# Supplementary material for: Deep metagenomics examines the oral microbiome during dental caries, revealing novel taxa and co-occurrences with host molecules
Source: HighWire-hosted journal article supplement (doi:10.1101/gr.265645.120), 2020-11-25
Supplement: Supplemental_Table_S4.xlsx [file Supplemental_Table_S4.xlsx]

## Sheet: Sheet1
Supplemental Table S4: Differential ranks of species associated with dental caries (i.e. disease status) generated by Songbird
Taxa	Intercept	Status[T.healthy]
Human herpesvirus 4	0.549099	-2.56652
Streptococcus mutans	-0.657756	-2.06489
Shuttleworthia satelles	-0.821918	-1.97006
Cryptobacterium curtum	-0.399316	-1.95201
Prevotella oris	1.91898	-1.77399
Porphyromonas endodontalis	0.191219	-1.46097
Prevotella denticola	0.884999	-1.36364
Prevotella histicola	5.24252	-1.3179
Filifactor alocis	-1.25711	-1.30212
Prevotella oulorum	1.72238	-1.18721
Atopobium rimae	1.46653	-1.17322
Prevotella veroralis	1.0902	-1.15853
Streptococcus gordonii	0.15691	-1.12792
Alloprevotella unclassified	-0.604723	-1.0704
candidate division TM7 single cell isolate TM7c	3.50924	-1.0263
Parvimonas unclassified	1.8424	-1.02353
candidate division TM7 single cell isolate TM7b	3.40342	-1.01496
Scardovia wiggsiae	1.63763	-1.01091
Eubacterium brachy	1.58836	-0.989221
Human herpesvirus 7	1.84296	-0.92313
Prevotella salivae	3.53088	-0.919661
Streptococcus intermedius	2.20194	-0.900286
Dialister invisus	1.40219	-0.869597
Veillonella atypica	3.07602	-0.822594
Selenomonas noxia	1.21316	-0.797032
Veillonella dispar	2.4846	-0.744244
Prevotella maculosa	-0.230298	-0.699721
Prevotella nigrescens	2.10369	-0.689095
Haemophilus influenzae	0.25021	-0.65335
Prevotella micans	-0.158784	-0.643387
Candidatus Prevotella conceptionensis	-1.81639	-0.622325
Parvimonas micra	0.0278112	-0.59579
Selenomonas flueggei	-0.301294	-0.576209
Streptococcus mitis oralis pneumoniae	1.69966	-0.560381
Atopobium parvulum	2.92703	-0.556995
Streptococcus salivarius	2.04828	-0.509374
Prevotella pallens	3.6561	-0.497295
Selenomonas infelix	-2.11966	-0.492289
Corynebacterium matruchotii	-0.457919	-0.480975
Megasphaera micronuciformis	2.52883	-0.466484
Eubacterium yurii	-2.23342	-0.45048
Streptococcus peroris	-1.78666	-0.449685
Streptococcus oligofermentans	-1.2533	-0.432358
Prevotella intermedia	-0.423198	-0.423947
Prevotella melaninogenica	4.6639	-0.41149
Gemella morbillorum	1.55789	-0.403227
Leptotrichia unclassified	0.27712	-0.399774
Eubacterium infirmum	2.18971	-0.357396
Granulicatella adiacens	1.42908	-0.33386
Leptotrichia buccalis	-1.78049	-0.328306
Campylobacter showae	-0.452471	-0.269217
Actinomyces graevenitzii	0.883228	-0.266908
Solobacterium moorei	2.94312	-0.256949
Granulicatella elegans	1.44951	-0.239244
Actinomyces naeslundii	-1.77621	-0.203171
Leptotrichia hofstadii	-1.90983	-0.187795
Streptococcus parasanguinis	2.75173	-0.181127
Peptostreptococcus unclassified	1.03079	-0.174289
Veillonella unclassified	4.56313	-0.173746
Treponema medium	-2.4001	-0.172846
Veillonella parvula	3.17326	-0.172519
Alloprevotella tannerae	1.36502	-0.172408
Treponema socranskii	-2.01497	-0.13739
Gemella haemolysans	0.649248	-0.129076
Haemophilus haemolyticus	-0.744536	-0.119806
Abiotrophia defectiva	1.26652	-0.101733
Campylobacter concisus	1.11353	-0.10067
Lachnospiraceae oral taxon 107	-2.10847	-0.0802563
Prevotella loescheii	-1.08495	-0.070332
Prevotella saccharolytica	-1.13391	-0.0608713
Capnocytophaga granulosa	-2.08162	-0.037715
Peptostreptococcus stomatis	0.448966	0.0098065
Catonella morbi	-1.02187	0.0473642
Selenomonas sputigena	-2.05602	0.0598884
Aggregatibacter segnis	-1.26047	0.0704536
Porphyromonas catoniae	0.494246	0.0772526
Selenomonas artemidis	-2.11093	0.0880836
Actinomyces viscosus	-1.19385	0.110597
Fusobacterium periodonticum	1.73268	0.112488
Neisseria meningitidis	-1.49124	0.121355
Lachnospiraceae bacterium ICM7	0.113465	0.128665
Fusobacterium nucleatum	1.27959	0.133252
Treponema denticola	-1.72444	0.142236
Eikenella corrodens	-1.92953	0.142435
Oribacterium sinus	1.61044	0.14963
Stomatobaculum longum	-0.895944	0.160052
Mycoplasma orale	-2.22137	0.161897
Actinomyces oris	-1.61185	0.176832
Leptotrichia wadei	-0.77004	0.199281
Streptococcus cristatus	-0.355578	0.204886
Lachnoanaerobaculum saburreum	-2.61787	0.208442
Streptococcus sanguinis	2.75555	0.209483
Capnocytophaga gingivalis	-0.581659	0.210864
Capnocytophaga unclassified	1.11192	0.211411
Neisseria flavescens	0.816374	0.217668
Actinomyces odontolyticus	0.374433	0.237577
Lachnospiraceae bacterium oral taxon 082	-2.12164	0.298284
Streptococcus tigurinus	-1.26613	0.3442
Prevotella nanceiensis	2.094	0.361611
Gemella sanguinis	0.222835	0.396487
Streptococcus constellatus	-0.091761	0.41881
Capnocytophaga ochracea	-2.02791	0.51378
Granulicatella unclassified	0.677252	0.574216
Streptococcus infantis	1.01044	0.575209
Prevotella pleuritidis	-0.672001	0.636289
Neisseria macacae	-1.93477	0.677899
Porphyromonas sp oral taxon 279	3.29309	0.719169
Haemophilus parainfluenzae	3.06725	0.732879
Campylobacter gracilis	-2.84838	0.762931
Escherichia unclassified	-3.24453	0.778595
Kingella denitrificans	-2.54961	0.807899
Haemophilus sputorum	-0.554737	0.80932
Bacteroidetes oral taxon 274	-1.53995	0.872752
Rothia dentocariosa	0.933912	0.884823
Oribacterium sp oral taxon 078	-2.88621	0.887796
Neisseria sicca	-0.165961	0.889801
Actinomyces johnsonii	-2.69269	0.91312
Leptotrichia goodfellowii	-2.03122	0.917636
Neisseria subflava	-1.35007	0.956153
Neisseria unclassified	1.58866	1.03196
Actinomyces massiliensis	-2.69755	1.20883
Rothia mucilaginosa	2.8135	1.21404
Rothia aeria	0.439299	1.2506
Lautropia mirabilis	0.10425	1.3692
Streptococcus australis	0.226608	1.41891
Aggregatibacter unclassified	-2.76746	1.41958
Aggregatibacter aphrophilus	-3.23658	1.49833
Cardiobacterium hominis	-3.45426	1.81513
Alloprevotella rava	-1.49046	2.03931
Propionibacterium propionicum	-2.94915	2.07085
Corynebacterium durum	-3.62098	2.26757
Actinobacillus unclassified	-3.12318	2.67197
Haemophilus paraphrohaemolyticus	-4.45907	3.05271
Neisseria elongata	-5.08455	4.22253
