# Supplementary material for: Deep metagenomics examines the oral microbiome during dental caries, revealing novel taxa and co-occurrences with host molecules
Source: HighWire-hosted journal article supplement (doi:10.1101/gr.265645.120), 2020-11-25
Supplement: Supplemental_Table_S5.xlsx [file Supplemental_Table_S5.xlsx]

## Sheet: Sheet1
Supplemental Table S5: Functional pathways present in samples identified by HumanN2. Columns with red text indicate caries group, columns with black text indicate healthy group.
# Pathway	SC18	SC20	SC21	SC22	SC25	SC26	SC27	SC31	SC32	SC34	SC01	SC36	SC37	SC38	SC39	SC40	SC17	SC19	SC23	SC24	SC28	SC29	SC30	SC33	SC35	SC41	SC42	SC43	SC44	SC45	SC46	SC05	SC47	SC48	SC49	SC50	SC51	SC53	SC54	SC55	SC56	SC07	SC09	SC10	SC11	SC15	SC16
UNMAPPED	321948	363673	404870	413378	361888	395454	488271	383285	393513	342495	495818	358070	460543	341852	411009	407333	393925	508618	460687	469108	327237	395554	360426	354455	335714	434480	364320	404443	325727	304910	366973	396114	356782	313463	481875	325941	474649	383263	396272	376752	386831	417038	531822	445733	457224	400047	328669
UNINTEGRATED	626834	578802	542527	541058	589503	554508	469471	566057	557720	608351	463160	579135	497379	601715	544583	543610	555130	449866	494918	486722	611626	558286	582128	591591	611435	520103	585409	537798	612026	631155	573766	553663	585300	617921	476883	620555	477392	561011	547350	562992	553075	535425	431273	509230	499571	548913	622452
UNINTEGRATED|g__Abiotrophia.s__Abiotrophia_defectiva	1087.14	391.27	1061.47	729.89	585.403	1488.82	872.356	793.419	270.37	887.881	1521.95	2052.21	717.47	430.901	2496.74	795.295	2623.73	3492.26	2067	1284.19	1394.04	620.665	1323.76	1669.29	0	346.313	4836.22	3467.73	220.97	0	1203.18	0	407.423	1225.34	370.436	655.523	3782.85	1964.1	0	688.535	643.418	4549.94	486.936	1110.55	2169.39	1073.81	264.424
UNINTEGRATED|g__Acidovorax.s__Acidovorax_ebreus	0	0	0	0	0	0	0	0	0	0	0	0	0	0	0	0	0	0	0	0	0	0	0	839.081	0	0	0	0	0	0	0	0	0	0	0	0	0	0	0	0	0	0	0	0	0	0	0
UNINTEGRATED|g__Acinetobacter.s__Acinetobacter_junii	0	0	0	0	0	0	0	0	0	0	0	0	0	0	0	0	0	0	0	0	0	0	0	119.621	0	0	0	0	0	0	0	0	0	0	0	0	0	0	0	0	0	0	0	0	0	0	0
UNINTEGRATED|g__Actinobaculum.s__Actinobaculum_sp_oral_taxon_183	0	0	0	0	0	0	0	0	0	0	0	0	0	0	0	0	0	0	0	0	0	0	0	399.444	0	0	0	0	0	0	0	0	0	0	0	0	0	0	0	0	0	0	0	0	0	0	0
UNINTEGRATED|g__Actinomyces.s__Actinomyces_georgiae	0	0	0	0	0	0	0	0	0	0	0	0	0	0	0	0	1279.41	0	0	0	0	0	935.513	1518.06	0	0	0	0	0	0	0	0	0	687.166	0	0	0	0	0	697.741	0	0	0	0	0	0	0
UNINTEGRATED|g__Actinomyces.s__Actinomyces_graevenitzii	1397.22	1242.54	7869.78	0	819.728	108.961	0	0	687.542	649.559	1138.28	419.254	1393.25	704.53	257.707	840.688	1478.77	831.313	0	358.547	549.863	590.241	1118.17	1709.19	1457.23	1243.21	0	624.587	854.677	617.633	1065.18	1752.67	812.83	80.7616	546.693	564.899	772.598	4705.63	2650.36	560.078	261.035	1090.94	498.33	1059.43	0	127.769	1270.57
UNINTEGRATED|g__Actinomyces.s__Actinomyces_johnsonii	0	0	0	0	0	0	0	0	0	0	0	0	0	256.504	0	113.119	543.663	0	0	0	226.414	0	215.764	199.12	0	0	1792.4	0	597.281	0	665.41	0	0	507.067	0	0	0	0	0	218.341	200.704	701.414	0	0	0	0	0
UNINTEGRATED|g__Actinomyces.s__Actinomyces_massiliensis	0	0	0	0	0	0	0	0	0	0	0	393.373	0	0	0	0	159.393	0	0	0	0	0	346.255	243.841	0	0	0	0	2271.38	713.372	724.476	0	0	0	0	0	145.328	0	0	0	0	594.466	0	0	0	0	0
UNINTEGRATED|g__Actinomyces.s__Actinomyces_naeslundii	0	816.381	0	927.48	0	0	0	387.93	0	0	453.654	1651.55	0	0	782.631	356.356	568.691	0	0	0	0	0	866.188	936.169	0	0	1538.59	1711.92	0	0	422.246	552.216	0	0	0	491.495	235.684	2539.22	666.487	0	454.579	0	0	0	0	785.457	0
UNINTEGRATED|g__Actinomyces.s__Actinomyces_odontolyticus	1453.99	2805.94	3876.24	3311.96	5386.14	1827.69	2421.95	2624.96	4079.63	3228.87	2903.66	7029.71	4652.27	5148.93	776.742	6036.63	3236.89	3953.57	1564.74	2016.09	4146.47	2782.4	2354.55	2079.87	8084.04	1878.7	0	0	10066.6	10778.3	6324.92	2659.11	3229.37	3777.51	5601.61	1892.88	3731.43	14280.6	4981.42	3344.56	4899.96	2075.1	2193.49	3266.24	1501.64	3729.11	6067.33
UNINTEGRATED|g__Actinomyces.s__Actinomyces_oris	0	566.649	0	0	0	0	0	0	0	0	0	3348.94	0	0	213.612	105.217	0	436.845	0	0	0	0	916.86	875.948	0	0	2723.94	0	0	753.665	609.474	610.739	0	1655.5	519.967	0	188.948	808.661	504.992	0	517.15	0	0	0	0	0	0
UNINTEGRATED|g__Actinomyces.s__Actinomyces_sp_HPA0247	0	0	0	0	0	0	0	0	0	0	0	0	0	0	1404.09	22966.4	0	0	0	0	0	0	0	2179.15	0	0	0	0	0	0	0	0	0	0	0	0	0	0	4495.74	7891.81	0	0	0	0	0	0	0
UNINTEGRATED|g__Actinomyces.s__Actinomyces_sp_ICM39	0	7026.49	0	0	0	0	0	0	0	0	0	0	0	0	0	0	0	0	0	0	0	0	0	2659.03	0	0	0	0	0	0	0	0	0	0	0	0	0	0	0	0	0	0	0	0	0	0	0
UNINTEGRATED|g__Actinomyces.s__Actinomyces_sp_ICM47	0	0	0	0	0	0	0	0	0	0	0	0	0	0	4745.75	0	0	0	0	0	0	0	0	11393.1	0	0	0	0	0	0	0	0	0	0	0	0	0	0	2564.11	0	0	0	0	0	0	0	0
UNINTEGRATED|g__Actinomyces.s__Actinomyces_sp_oral_taxon_172	0	0	0	0	0	0	0	0	0	0	0	0	0	0	0	0	0	0	0	0	0	0	0	8419.46	0	0	0	0	0	0	0	0	0	0	0	0	0	0	0	0	0	0	0	0	0	0	0
UNINTEGRATED|g__Actinomyces.s__Actinomyces_sp_oral_taxon_448	0	0	0	0	0	0	0	0	0	0	0	0	0	0	2705.26	0	0	0	0	0	0	0	0	270.746	0	0	0	0	0	0	0	0	0	0	0	0	0	0	0	0	0	0	0	0	0	0	0
UNINTEGRATED|g__Actinomyces.s__Actinomyces_viscosus	657.002	1176.65	282.718	0	0	1479.05	0	0	1335.52	0	0	3509.4	0	432.186	860.723	168.868	321.125	0	0	0	722.038	0	927.484	1313.96	721.712	0	4575.8	5520.61	2336.61	1267.44	670.249	877.256	591.701	1124.95	0	0	0	1257.72	658.493	441.527	0	0	0	0	0	745.229	961.456
UNINTEGRATED|g__Aggregatibacter.s__Aggregatibacter_actinomycetemcomitans	0	0	0	0	0	0	0	0	0	0	0	0	0	0	0	0	0	0	0	0	0	0	0	0	0	0	0	0	0	0	0	1483.47	0	0	0	0	0	0	0	0	183.434	0	0	0	0	0	0
UNINTEGRATED|g__Aggregatibacter.s__Aggregatibacter_aphrophilus	0	0	237.727	0	0	0	0	0	0	0	684.87	0	0	0	0	0	0	0	577.63	1299.52	411.67	0	0	380.062	0	0	465.225	1988.29	0	0	1640.25	0	0	385.183	0	0	0	0	0	956.104	0	0	0	0	0	0	0
UNINTEGRATED|g__Aggregatibacter.s__Aggregatibacter_segnis	0	0	0	237.343	0	0	1077.91	0	0	0	1638.38	827.971	0	0	121.142	0	1112.73	307.28	1730.46	2436.06	167.261	218.145	289.188	0	0	903.137	0	1237.1	809.566	0	1378.92	0	985.778	2297.55	192.633	0	0	0	0	275.701	0	1941.5	0	608.273	0	0	0
UNINTEGRATED|g__Alloprevotella.s__Alloprevotella_rava	0	0	0	0	0	0	481.937	1223.95	0	0	342.772	0	0	0	0	224.03	0	0	0	0	206.178	513.743	903.581	0	0	1659	0	0	0	0	0	0	0	0	3914.01	0	187.881	488.165	1835.93	829.452	93.2522	0	0	0	668.543	0	0
UNINTEGRATED|g__Alloprevotella.s__Alloprevotella_tannerae	791.926	2402.74	3904.35	0	0	1623.52	9306.6	2334.45	0	2144.69	6776.4	2303.46	3344.07	2101.2	1454.02	784.944	1333.66	1341.33	3884.86	0	0	6014.16	0	426.699	0	37010.2	0	478.329	0	924.774	0	0	2261.95	679.304	6192.68	3960.06	796.709	1354.16	0	0	1468.6	4803.06	0	3532.06	3462.49	0	0
UNINTEGRATED|g__Alloscardovia.s__Alloscardovia_omnicolens	0	0	0	0	0	0	0	0	0	0	0	0	0	0	0	0	0	0	0	0	0	0	0	0	0	0	0	0	0	0	0	0	0	0	0	325.9	0	0	0	0	0	0	0	0	0	0	0
UNINTEGRATED|g__Anaeroglobus.s__Anaeroglobus_geminatus	0	0	0	0	0	0	0	0	0	0	0	0	0	0	233.809	0	0	0	0	0	0	0	0	0	0	0	0	0	0	0	0	0	0	0	0	0	0	0	0	0	0	484.484	0	0	0	0	0
UNINTEGRATED|g__Atopobium.s__Atopobium_parvulum	3444.08	4634.49	1958.35	3800.56	4365.49	2647.12	4434.17	6212.59	5288.26	4079.33	2621.59	5248.23	4427.28	1889.05	4996.54	8645.54	4287.04	3073.67	1612.77	1895.83	5629.2	3390.44	1850.03	10938.2	6222.87	3571.78	1997.29	1498.96	860.515	2351	352.23	2488.58	3583.71	670.976	1887.42	14328.9	189.042	606.692	3183.55	2174.81	809.804	3482.32	1166.62	4705.46	7753.88	6088.76	5556.26
UNINTEGRATED|g__Atopobium.s__Atopobium_rimae	536.569	2363.14	811.817	605.164	0	830.184	1817.42	0	664.869	748.882	551.393	3868.07	2526.15	0	1818.73	622.282	451.121	1630.43	330.437	0	0	655.459	403.33	2329.03	0	649.896	251.502	0	324.71	2002.49	0	0	0	344.401	0	2825.06	0	394.133	166.832	0	140.99	507.516	715.185	3550.37	3509.09	1309.02	0
UNINTEGRATED|g__Atopobium.s__Atopobium_sp_ICM58	0	0	0	0	0	0	0	0	0	0	0	0	0	0	0	0	0	0	0	0	0	0	4924.3	0	0	0	0	0	0	0	0	0	0	0	0	0	0	0	0	0	0	0	0	0	0	0	0
UNINTEGRATED|g__Bacteroidetes_noname.s__Bacteroidetes_oral_taxon_274	0	375.82	0	0	0	0	0	0	0	0	201.614	0	233.521	0	0	0	214.228	123.621	515.37	0	0	0	769.7	241.816	0	407.932	0	0	378.385	335.538	1473.53	0	0	0	201.706	0	0	1547.35	0	0	189.363	306.249	0	0	255.392	555.633	0
UNINTEGRATED|g__Bifidobacterium.s__Bifidobacterium_dentium	0	0	0	0	0	0	0	0	0	0	0	626.959	0	0	0	0	0	0	0	0	0	0	0	0	0	0	0	0	0	0	0	0	0	0	0	0	0	0	0	0	0	0	0	218.344	0	0	0
UNINTEGRATED|g__Bifidobacterium.s__Bifidobacterium_longum	0	0	0	0	0	0	0	0	0	0	0	0	0	0	0	0	0	0	0	0	0	0	0	0	0	0	0	0	0	0	0	0	0	0	1241.61	0	0	0	0	0	0	0	0	0	0	0	0
UNINTEGRATED|g__Bulleidia.s__Bulleidia_extructa	0	0	0	0	0	0	0	0	0	0	0	0	0	0	0	0	0	0	338.624	0	0	0	0	0	0	0	0	0	0	0	0	0	0	0	0	0	0	0	0	0	0	473.708	0	0	330.873	0	0
UNINTEGRATED|g__Campylobacter.s__Campylobacter_concisus	2721.71	2359.67	2692.41	3547.43	1918.88	880.105	2655.47	927.804	1870.89	1132.78	2180.63	2138.16	5425.11	5193.15	3439.5	865.501	554.859	2418.22	814.92	5149.76	2338.34	1761.85	1111.14	2583.85	2806.58	1635.84	4643.51	514.903	1246.13	1422.67	1524.72	7427.95	12468.1	1071.69	1020.28	1519.56	942.342	2596.31	7623.25	7878.2	1678.55	1053.04	9221.16	1427.2	900.297	680.425	924.815
UNINTEGRATED|g__Campylobacter.s__Campylobacter_gracilis	0	183.876	0	0	0	0	0	0	0	0	0	0	0	264.218	69.6107	0	244.521	0	0	305.302	0	0	0	374.79	0	0	132.156	0	0	0	365.457	137.087	0	101.775	0	0	0	0	118.932	243.675	120.928	110.743	0	0	0	0	0
UNINTEGRATED|g__Campylobacter.s__Campylobacter_rectus	0	0	0	0	0	0	0	0	0	0	0	0	0	0	0	0	0	0	0	0	0	0	1011.46	0	0	0	0	0	0	0	0	0	0	0	0	0	0	0	0	0	0	0	0	0	0	0	0
UNINTEGRATED|g__Campylobacter.s__Campylobacter_showae	0	4646.36	868.145	550.072	0	0	593.176	0	0	0	0	595.73	0	308.292	0	0	284.441	570.762	1409.15	2680.6	624.122	0	303.609	269.083	0	283.465	0	344.571	501.174	757.095	402.679	297.178	1901.94	402.608	0	298.101	432.187	805.006	587.149	0	323.476	675.334	638.903	0	0	0	0
UNINTEGRATED|g__Capnocytophaga.s__Capnocytophaga_gingivalis	0	1802.43	1640.22	549.801	532.734	0	1178.74	346.676	0	0	296.446	891.357	0	358.453	281.206	0	0	1870.58	232.653	2511.84	835.175	0	432.076	1033.9	0	838.979	425.507	2800.28	1212.47	330.78	647.208	597.787	1870.63	836.536	598.168	0	487.388	2555.62	1016.84	280.945	323.515	719.805	0	1599.76	0	0	0
UNINTEGRATED|g__Capnocytophaga.s__Capnocytophaga_granulosa	0	875.192	0	0	0	0	0	0	0	0	0	301.834	0	424.081	0	0	466.752	622.041	0	842.797	0	0	192.815	226.508	0	0	612.677	0	277.318	0	881.609	393.614	0	224.56	0	0	0	578.8	325.661	236.526	0	1050.25	0	0	0	0	0
UNINTEGRATED|g__Capnocytophaga.s__Capnocytophaga_ochracea	0	0	0	0	0	0	0	0	0	0	0	0	0	294.185	200.651	0	729.563	525.943	686.805	420.1	502.958	443.889	855.852	987.276	0	259.194	758.364	0	0	267.645	548.788	721.563	0	0	0	0	0	859.54	389.018	0	236.472	0	554.594	361.71	459.911	431.977	0
UNINTEGRATED|g__Capnocytophaga.s__Capnocytophaga_sp_oral_taxon_329	0	0	0	0	0	0	0	0	0	0	0	0	0	0	0	0	0	0	0	0	0	0	0	360.245	0	0	0	0	0	0	0	0	0	0	0	0	0	0	0	0	0	0	0	0	0	0	0
UNINTEGRATED|g__Cardiobacterium.s__Cardiobacterium_hominis	0	216.806	0	0	0	0	0	0	0	0	0	0	0	135.585	0	0	0	209.419	222.631	225.432	363.636	0	390.872	376.585	0	0	276.491	0	453.027	442.38	452.737	0	0	257.211	0	0	185.917	0	0	0	317.071	0	0	0	0	0	0
UNINTEGRATED|g__Catonella.s__Catonella_morbi	0	373.29	0	0	0	0	750.858	0	268.239	0	0	276.753	0	0	301.374	0	1034.27	1409.13	577.813	238.946	873.242	688.95	482.26	349.386	0	646.641	0	0	0	367.793	635.642	0	269.548	520.539	763.374	0	0	0	340.412	0	514.803	1457.13	0	848.593	906.032	213.195	139.242
UNINTEGRATED|g__Centipeda.s__Centipeda_periodontii	0	0	0	0	0	0	0	0	0	0	0	0	0	0	0	0	0	0	1048.64	0	0	486.589	0	0	0	0	0	0	0	0	0	0	0	0	0	0	0	0	0	0	0	0	0	0	0	836.485	0
UNINTEGRATED|g__Clostridiales_Family_XIII_Incertae_Sedis_noname.s__Eubacterium_infirmum	6145.35	2923.15	2683.73	3188.48	2712.27	855.906	3133.43	5990.64	10431.3	2381.76	8168.46	3169.71	3364.67	1043.48	1292.58	5821.63	6386.77	3065	1439.91	1920.61	585.569	6889	1275.13	9324.18	9988.32	8343.84	0	588.437	1698.54	1439.89	667.799	0	617.675	950.329	4225.66	2145.77	1766.74	1380.99	831.972	1378.76	2188.58	3491.64	1467.64	8283.87	4293.84	4641.6	0
UNINTEGRATED|g__Corynebacterium.s__Corynebacterium_durum	0	244.476	0	0	0	0	0	129.681	0	0	0	0	0	0	0	0	0	0	0	0	0	0	616.774	310.992	0	0	2544.01	319.086	0	108.573	239.029	0	406.937	424.608	0	0	167.048	1089.44	0	184.592	104.157	0	0	0	0	0	0
UNINTEGRATED|g__Corynebacterium.s__Corynebacterium_matruchotii	0	239.038	0	187.325	0	0	0	0	0	0	0	1457.45	0	760.685	0	0	258.512	230.514	405.902	0	194.926	0	580.973	246.443	0	0	610.382	0	1298.98	191.037	1190.43	281.411	0	301.682	358.251	0	0	398.2	279.424	195.776	172.707	6315.3	0	0	0	480.004	0
UNINTEGRATED|g__Cryptobacterium.s__Cryptobacterium_curtum	0	0	0	356.035	0	0	78.5323	0	120.944	0	0	803.726	0	0	161.384	0	0	0	0	0	0	290.372	0	0	0	0	0	0	0	0	0	0	0	0	0	526.898	0	0	0	0	0	0	0	413.586	358.95	143.548	0
UNINTEGRATED|g__Dialister.s__Dialister_invisus	1079.87	620.446	352.917	1522.31	0	491.564	2608.5	0	823.748	438.897	777.492	3612.39	2551.49	0	2720.22	685.088	1191.85	584.311	830.977	0	0	937.557	252.958	2165.35	0	1261.21	936.514	316.447	317.704	1033.72	1013.16	0	8041.86	595.697	439.175	1713.36	0	1551.45	0	726.393	287.382	651.652	764.882	4889.14	8127.82	786.443	649.304
UNINTEGRATED|g__Eikenella.s__Eikenella_corrodens	0	0	0	487.497	0	0	0	0	0	0	0	325.462	0	477.661	147.948	174.404	367.53	337.134	356.531	625.045	504.178	0	192.899	125.435	0	0	0	838.259	0	0	523.617	0	0	153.397	0	0	150.055	923.124	0	0	102.968	811.013	0	166.433	0	0	0
UNINTEGRATED|g__Enhydrobacter.s__Enhydrobacter_aerosaccus	0	0	0	0	0	0	0	0	0	0	0	0	0	0	0	0	0	0	0	0	0	0	0	104.724	0	0	0	0	0	0	0	0	0	0	0	0	0	0	0	0	0	0	0	0	0	0	0
UNINTEGRATED|g__Escherichia.s__Escherichia_coli	4365.62	0	0	0	0	0	0	0	0	0	0	0	0	0	0	1667.24	0	0	0	0	829.854	0	0	1455.81	0	0	0	0	0	0	0	0	0	0	0	2198.71	0	0	0	0	0	0	895.998	0	1833.26	1988.53	130214
UNINTEGRATED|g__Eubacteriaceae_noname.s__Eubacteriaceae_bacterium_CM5	0	0	0	0	0	1240.79	0	0	0	0	0	0	0	0	0	0	0	0	0	0	0	0	0	0	0	0	0	0	0	0	0	0	0	0	0	0	0	0	0	0	0	0	0	0	0	0	0
UNINTEGRATED|g__Eubacterium.s__Eubacterium_brachy	0	1318.56	0	0	0	0	520.075	0	1283.32	624.633	2106.18	436.767	0	929.952	1751.09	1050.75	0	1105.61	718.492	0	0	814.354	1083.1	3208.26	565.244	1946.02	658.241	0	564.928	741.211	1007.14	4284.16	0	280.92	953.369	692.435	0	0	0	0	680.679	4915	938.899	1562.51	4656.17	953.329	542.279
UNINTEGRATED|g__Eubacterium.s__Eubacterium_saphenum	0	0	0	0	0	0	0	0	0	0	0	0	0	0	222.219	0	0	0	0	0	0	0	0	0	0	0	0	0	0	0	0	0	0	0	0	0	0	0	0	0	0	0	0	0	193.891	0	0
UNINTEGRATED|g__Filifactor.s__Filifactor_alocis	0	0	0	0	0	0	0	0	0	0	0	0	0	0	239.904	0	0	0	0	0	0	0	0	0	0	0	0	0	0	0	0	0	0	0	0	0	0	0	0	0	0	0	0	0	0	0	0
UNINTEGRATED|g__Fusobacterium.s__Fusobacterium_necrophorum	0	0	0	0	0	0	0	0	0	0	0	0	0	0	0	0	0	0	0	0	0	0	0	0	0	0	0	0	0	0	0	4924.45	0	0	0	0	0	0	0	0	0	0	0	0	0	0	0
UNINTEGRATED|g__Fusobacterium.s__Fusobacterium_nucleatum	993.194	4874.23	1122.12	1071.76	1054.85	1950.27	1442.45	2147.7	1715.63	841.705	3089.07	5959.15	1229.42	4724.1	1631.13	1645.29	4840.95	6357.25	5478.97	2910.04	1731.19	1756.77	5165.22	5583.49	1197.11	2099.22	4714.44	2593.53	6328.33	3868.65	5619.19	2114.28	2709.44	2999.56	1560.31	1870.99	3789.35	6291.48	1951.26	2166.93	5277.96	5519.7	1592.24	3029.06	2787.98	1370.49	976.855
UNINTEGRATED|g__Fusobacterium.s__Fusobacterium_periodonticum	1678.52	11226	6647.3	1792.44	2114.87	2245.29	3631.84	4723.87	4506.03	2101.67	9454.97	12623	1077.54	9743.91	240.603	1590.14	5617.5	7277.28	3513.96	4847.41	1388.95	5212.7	2383.81	5353.8	7514.87	3497.81	751.109	7313.32	25161.9	12878.7	5415.64	0	7368.1	2151.68	4269.42	1079.3	8660.92	21440.8	2901.27	2669.89	12269.2	5742.79	2244.68	6422.55	1801.75	2164.51	1903.2
UNINTEGRATED|g__Gemella.s__Gemella_bergeri	0	0	0	0	0	0	0	0	0	0	0	0	0	0	0	0	0	0	0	0	0	0	185.061	0	0	0	0	0	0	0	0	0	0	0	0	0	0	0	0	0	0	0	0	0	0	0	0
UNINTEGRATED|g__Gemella.s__Gemella_haemolysans	835.949	405.608	268.271	435.971	237.539	1258.16	1109.05	1390.9	494.844	870.178	637.314	1258.24	0	788.7	1620.05	510.571	1325.06	1362.21	1600.43	733.256	1458.5	732.163	775.6	182.413	550.452	340.595	1837.52	891.788	296.149	136.393	761.702	579.959	631.758	1486.85	734.986	1925.35	1125.26	0	306.285	613.855	172.984	1683.09	167.344	341.941	1216.47	194.458	561.959
UNINTEGRATED|g__Gemella.s__Gemella_morbillorum	271.517	503.176	827.371	270.033	298.225	1493.1	2347.7	372.192	1129.67	1164.89	2835.2	1547.23	0	660.95	1476.28	940.196	3151.3	8260.3	5098.44	1165.97	861.031	2643.78	259.38	819.327	312.007	549.624	1108.61	807.462	604.996	82.9929	414.749	529.79	852.077	1663.84	2076.75	1892.17	927.69	722.621	218.884	820.274	320.439	12195.8	972.044	240.715	2633.94	691.333	197.695
UNINTEGRATED|g__Gemella.s__Gemella_sanguinis	264.837	868.111	811.583	200.862	301.205	1036	569.605	231.478	102.789	0	626.956	651.758	0	1364.54	147.349	115.912	344.035	558.681	913.972	319.081	918.097	180.756	254.489	1307.12	355.827	0	5217.55	734.038	2441.65	822.404	651.329	0	0	1189.51	1116.08	0	445.465	2914.37	158.729	111.768	703.324	904.707	0	334.066	209.217	297.433	375.869
UNINTEGRATED|g__Granulicatella.s__Granulicatella_adiacens	390.699	1641.76	1420.42	922.349	492.357	1987.88	3834.18	1280.12	686.111	2283.74	1837.07	1799.69	1009.81	921.976	3363.72	1430.45	2165.31	2792.32	2440.39	1198.91	1644.94	2614.17	1588.38	1373.57	1128.81	775.63	6734.93	2163.54	2721.33	2550.68	1583.93	1027.82	460.357	1860.62	1315.39	1664.9	994.54	6369.42	453.946	4066.35	830.369	2256.55	426.311	751.422	2453.78	1550.71	810.142
UNINTEGRATED|g__Granulicatella.s__Granulicatella_elegans	0	0	409.439	246.832	461.546	868.57	1442.52	2967.87	1051.38	3391.15	788.027	2002.9	619.347	251.241	1991.4	280.026	1440.74	2633.1	2154.27	787.684	3418.74	346.344	513.096	106.468	526.894	362.239	392.764	894.743	0	0	381.373	0	1105.85	144.043	747.234	460.005	2809.1	0	606.692	1236.14	195.675	3673.45	0	456.91	3566.46	309.611	0
UNINTEGRATED|g__Haemophilus.s__Haemophilus_haemolyticus	0	0	162.044	0	0	0	688.128	244.945	169.412	438.683	245.083	198.222	334.279	308.72	341.152	73.7056	196.586	311.776	267.058	458.593	437.063	180.803	101.687	0	452.567	303.096	416.659	1341.83	0	355.21	664.411	311.495	1074.74	324.376	214.779	261.208	335.46	0	292.665	540.298	275.015	323.808	0	407.475	271.953	0	0
UNINTEGRATED|g__Haemophilus.s__Haemophilus_influenzae	0	0	0	0	0	5510.55	656.126	381.535	524.369	1117.39	0	705.546	369.89	2297.8	434.77	2996.69	530.687	0	613.52	744.952	1034.8	0	506.373	0	517.931	292.608	505.51	1721.1	0	636.43	922.954	358.2	3383.76	461.621	0	578.142	1188.84	1218.55	550.237	572.063	361.548	300.352	348.591	519.327	466.111	0	0
UNINTEGRATED|g__Haemophilus.s__Haemophilus_parahaemolyticus	0	275.748	0	0	0	0	0	0	0	0	0	0	0	0	0	0	0	0	0	302.625	0	0	0	0	0	0	0	0	0	0	575.281	506.503	0	986.278	0	0	0	0	0	0	0	0	0	0	0	0	0
UNINTEGRATED|g__Haemophilus.s__Haemophilus_parainfluenzae	1921.6	14026.3	31489.6	14110.9	5844.83	13848.4	13325.1	8415.81	10478.8	6889.77	7474.49	10016.7	6109.68	41226.6	10824.1	3468.22	6341.94	13032	13382.4	17351.9	15853.4	5860.13	12393.7	12419.8	11163.3	7067.36	7051.99	39093.6	68559	57873.6	53624	1400.01	13292.3	70745.1	6623.18	7169.1	26409	42509.5	31984.8	13337.5	50521.8	5881.59	3345.23	13388	10179.1	3291.05	12514.2
UNINTEGRATED|g__Haemophilus.s__Haemophilus_paraphrohaemolyticus	0	0	0	0	0	0	0	0	0	0	0	0	434.277	0	0	0	440.294	0	0	0	2039.15	0	0	0	0	0	0	1089.44	0	0	395.198	0	764.381	451.1	0	0	726.608	0	0	351.827	0	0	0	0	0	0	0
UNINTEGRATED|g__Haemophilus.s__Haemophilus_pittmaniae	0	0	2063.04	0	0	0	0	0	0	476.376	0	0	0	0	0	0	0	0	0	0	0	0	0	0	0	0	0	0	0	0	0	0	0	0	0	0	0	0	0	0	0	0	374.782	2965.9	0	0	0
UNINTEGRATED|g__Haemophilus.s__Haemophilus_sputorum	0	520.333	0	0	517.799	0	911.659	736.069	181.643	0	493.421	1122.61	410.359	1216.19	0	0	288.788	301.6	805.506	1031.16	218.14	470.619	0	276.131	0	430.349	359.331	1336.85	0	1294.46	2943.73	0	334.286	214.239	0	0	1211.59	1230.1	1795.57	495.275	692.885	481.83	0	416.777	562.511	0	1107.32
UNINTEGRATED|g__Johnsonella.s__Johnsonella_ignava	0	0	0	0	0	0	0	0	0	0	0	0	0	0	0	0	438.172	0	308.867	0	0	0	401.546	256.282	0	0	0	0	0	0	215.182	0	0	0	0	0	0	0	0	0	149.867	0	0	0	0	0	0
UNINTEGRATED|g__Kingella.s__Kingella_denitrificans	0	0	0	0	0	0	0	0	0	0	0	958.328	0	0	0	0	0	0	0	1386.29	1303.01	0	613.819	0	0	0	0	0	0	0	0	0	0	327.057	0	1741.84	257.917	0	0	800.345	0	916.744	0	0	0	0	0
UNINTEGRATED|g__Kingella.s__Kingella_oralis	0	0	0	0	0	0	0	0	0	0	0	0	0	0	0	0	0	0	0	0	0	0	0	0	0	0	415.42	0	357.966	0	0	0	0	537.164	0	0	0	0	621.84	0	0	0	0	0	0	0	0
UNINTEGRATED|g__Lachnoanaerobaculum.s__Lachnoanaerobaculum_saburreum	0	0	0	0	0	0	0	0	0	0	0	1344.76	0	0	535.944	137.025	468.202	0	0	0	0	0	324.527	311.786	0	0	0	0	354.813	0	0	0	557.798	0	0	0	0	0	0	373.779	0	511.144	0	0	0	0	0
UNINTEGRATED|g__Lachnospiraceae_noname.s__Lachnospiraceae_bacterium_ICM7	0	1432.41	9470.58	0	0	0	1083.51	399.255	829.818	0	905.756	1372.44	0	1238.32	0	0	502.528	1018.32	1242.53	809.151	253.557	618.421	953.794	465.835	874.603	657.034	464.702	1105.98	3060.56	1641.19	480.428	0	763.118	1104.16	192.611	0	2005.1	1319.86	600.871	901.956	2319.03	757.642	0	1872.29	494.573	0	427.992
UNINTEGRATED|g__Lachnospiraceae_noname.s__Lachnospiraceae_bacterium_oral_taxon_082	0	0	0	0	1206.97	0	0	0	0	0	0	950.66	0	773.454	426.37	678.081	0	0	0	0	1339.45	0	772.031	1452.96	0	0	0	0	377.1	1606.5	0	921.459	1060.94	0	0	903.904	0	0	650.741	764.082	674.967	0	0	0	0	0	0
UNINTEGRATED|g__Lachnospiraceae_noname.s__Lachnospiraceae_oral_taxon_107	0	651.4	0	0	0	0	0	0	0	0	482.855	0	0	0	0	0	847.081	433.27	566.032	0	0	0	361.748	0	0	0	254.247	0	0	0	932.01	0	0	431.755	0	0	0	0	0	475.305	0	909.585	0	0	259.88	0	0
UNINTEGRATED|g__Lactobacillus.s__Lactobacillus_gasseri	0	0	0	0	0	0	0	0	698.22	0	0	0	0	0	0	0	0	0	0	0	0	0	0	0	0	0	0	0	0	0	0	0	0	0	0	0	0	0	101.855	0	0	0	0	586.686	0	0	0
UNINTEGRATED|g__Lactobacillus.s__Lactobacillus_rhamnosus	0	0	0	0	0	0	0	0	0	0	0	0	0	0	0	0	0	0	0	0	0	0	0	0	0	0	0	0	0	0	0	0	0	0	0	0	0	0	0	0	0	0	0	154.697	0	0	0
UNINTEGRATED|g__Lautropia.s__Lautropia_mirabilis	0	579.493	1326.09	125.773	0	1432.83	624.145	1136.52	0	0	423.967	5603.09	723.833	514.844	512.961	318.125	410.17	3619.98	657.044	473.58	2353.84	305.816	3478.53	483.546	0	211.093	198.119	6637.99	6912.98	3206.36	17525.2	5258.34	1750.45	7314.75	0	824.174	1921.67	9422.13	11001.9	7429.72	2299.94	293.651	0	651.715	728.991	563.368	0
UNINTEGRATED|g__Leptotrichia.s__Leptotrichia_buccalis	0	0	0	0	0	0	433.668	0	0	0	383.83	227.963	0	343.869	0	0	375.849	514.383	520.877	185.424	0	236.776	0	354.477	0	211.165	0	0	0	0	550.729	0	690.662	0	0	0	0	0	0	155.518	0	1285.3	0	0	381.727	106.941	0
UNINTEGRATED|g__Leptotrichia.s__Leptotrichia_goodfellowii	0	0	0	0	0	0	0	1009.51	0	0	0	0	0	0	150.231	156.353	724.118	496.979	0	325.887	115.754	0	421.887	794.089	0	0	0	167.012	0	81.8449	493.606	0	229.299	330.78	0	216.603	0	0	157.313	197.12	68.1189	0	0	370.377	279.669	0	0
UNINTEGRATED|g__Leptotrichia.s__Leptotrichia_hofstadii	0	0	0	0	0	0	0	0	0	0	0	1067.52	0	0	985.192	0	1253.3	0	1573.57	1278.78	0	0	986.284	343.431	0	0	1618.25	0	1245.69	0	0	0	0	0	0	0	0	0	0	1304.75	0	2046.97	0	0	0	0	0
UNINTEGRATED|g__Leptotrichia.s__Leptotrichia_shahii	0	0	0	0	0	0	0	0	0	0	0	0	0	762.062	178.359	0	327.044	0	433.761	506.851	0	503.09	155.216	250.71	0	0	0	0	0	0	0	0	0	0	0	567.905	0	0	77.8683	584.58	294.558	637.461	557.705	0	540.764	261.109	0
UNINTEGRATED|g__Leptotrichia.s__Leptotrichia_sp_oral_taxon_215	0	0	0	0	0	0	0	0	0	0	0	0	0	0	0	0	0	0	0	0	0	0	0	552.858	0	0	0	0	0	0	0	0	0	0	0	0	3155.22	0	0	0	0	0	0	0	0	0	0
UNINTEGRATED|g__Leptotrichia.s__Leptotrichia_wadei	0	0	0	513.833	861.905	0	495.405	1071.33	0	0	656.886	368.829	1299.8	1071.59	270.504	329.912	619.829	302.358	681.297	1741.77	0	1024.3	522.028	1001.85	1158.5	532.111	436.727	0	521.899	0	0	736.635	1857.58	0	629.997	674.272	0	0	257.419	1728.29	557.061	1001.77	1598.77	380.636	566.52	499.403	0
UNINTEGRATED|g__Megasphaera.s__Megasphaera_micronuciformis	7560.95	0	0	2926.93	8920.87	1765.33	893.038	2011.53	1756.27	2654.8	993.372	3718.61	3329.85	5035.3	6285.85	6345.44	817.249	1115.67	1665.79	3694.55	3202.44	1546.57	3603.15	7877.92	4981.56	865.437	136.829	0	670.82	6345.87	135.848	11323.2	8534.14	199.315	2526.61	10005.2	0	582.426	6275.63	5004.01	2057.99	1071.89	12120.4	872.742	1787.95	5900.73	4303.34
UNINTEGRATED|g__Moraxella.s__Moraxella_catarrhalis	0	0	0	0	0	0	0	0	0	0	0	0	0	0	0	575.102	0	0	0	0	0	0	0	0	0	0	0	0	0	0	0	0	0	0	0	0	0	0	0	0	0	0	0	0	0	0	0
UNINTEGRATED|g__Neisseria.s__Neisseria_bacilliformis	0	0	0	0	0	0	0	0	0	0	0	0	0	0	0	0	0	0	0	0	0	0	0	0	0	0	0	0	0	0	0	0	0	0	0	0	0	0	186.571	0	0	0	0	0	0	0	0
UNINTEGRATED|g__Neisseria.s__Neisseria_cinerea	0	0	0	0	0	0	0	0	0	0	0	0	0	0	0	0	0	0	0	349.681	1152.39	0	0	0	0	0	0	0	0	0	0	0	0	0	0	0	117.643	0	0	0	0	0	0	0	254.773	0	0
UNINTEGRATED|g__Neisseria.s__Neisseria_elongata	0	0	0	0	0	0	682.109	0	0	0	0	0	0	0	0	0	0	1019.18	0	1351.71	1216.23	0	563.899	1099.96	0	0	0	0	795.485	0	1141.38	0	0	1978.96	0	718.96	409.469	5846.98	1779.81	1178	716.891	0	0	0	0	0	0
UNINTEGRATED|g__Neisseria.s__Neisseria_flavescens	0	2870.19	908.666	1926.51	2303.88	1050.01	1853.34	2191.15	1036.46	0	2952.26	2432.37	0	9676.28	707.514	0	1178.32	2626.37	3087.33	6806.47	0	825.829	1896.31	2078.31	0	7195.47	3071.94	19202.9	3913.79	4372.5	13039	0	3699.97	13824.5	773.189	0	4185.08	36795	2910.18	7510.49	11905.1	4462.56	0	3459.08	755.696	0	831.272
UNINTEGRATED|g__Neisseria.s__Neisseria_gonorrhoeae	0	0	0	0	0	0	0	0	0	0	177.634	0	0	0	0	0	0	0	0	584.885	0	0	85.0129	0	0	0	0	0	0	0	0	0	0	0	0	0	0	0	0	0	0	0	0	0	0	0	0
UNINTEGRATED|g__Neisseria.s__Neisseria_lactamica	0	0	0	0	0	0	0	0	0	0	0	0	0	0	0	0	0	0	0	1063.59	197.016	0	0	0	0	0	0	0	0	0	0	0	826.742	0	0	0	0	0	0	0	0	0	0	0	0	0	0
UNINTEGRATED|g__Neisseria.s__Neisseria_macacae	0	0	0	0	0	4991.15	0	0	0	0	996.418	3778.82	0	830.379	0	0	836.603	2817.28	2425.54	2431.19	1624.97	0	2054.18	665.772	0	0	6843.24	9797.13	0	0	5482.26	0	0	0	0	3800.85	3819.74	3546.52	0	5992.89	0	3451.54	0	1804.88	0	0	0
UNINTEGRATED|g__Neisseria.s__Neisseria_meningitidis	0	0	458.751	435.586	734.073	539.211	395.037	446.443	519.238	0	508.647	1022.88	780.83	650.623	75.2089	0	0	1034.01	360.158	1243.52	324.499	232.026	0	0	0	573.832	910.548	0	762.79	0	0	262.122	652.056	0	0	0	444.674	2022	0	1314.8	0	499.089	0	423.572	357.195	0	0
UNINTEGRATED|g__Neisseria.s__Neisseria_sicca	1816.73	1030.36	0	1781.54	0	10179.9	3343.11	1300.87	0	1367.29	2212.25	12207	2271.1	570.547	2743.84	0	2116.4	7859.08	5786.72	7325.97	4159.96	3968.53	5512.15	3127.79	0	1241.7	20443.6	33251.2	0	0	16946.2	1643	8400.69	26310.2	1459.75	6722.1	6229.57	8757.93	1117.4	19430.4	7176.91	6616.19	2992.43	4194.8	3427.35	0	0
UNINTEGRATED|g__Neisseria.s__Neisseria_sp_oral_taxon_014	0	0	0	0	0	0	0	0	0	0	0	0	0	0	0	0	0	0	0	0	0	0	0	0	0	0	0	0	0	0	0	0	0	0	0	0	0	0	0	0	2206	0	0	0	0	0	0
UNINTEGRATED|g__Neisseria.s__Neisseria_subflava	0	7850.1	834.425	0	0	0	1216.17	0	0	0	2149.26	3933.66	0	7580.71	0	0	617.269	1995.82	2200.74	3614.75	0	693.887	0	3153.95	0	0	2159.26	14670.8	4257.71	8582.75	15189.3	0	4546.77	14029	1206.06	0	0	41062.4	4224.09	5005.62	16550.8	0	0	2129.59	0	0	0
UNINTEGRATED|g__Oribacterium.s__Oribacterium_sinus	1195.08	2176.36	3626.15	1441.08	1932.72	6875.26	1665.19	1551.97	2911.71	2357.68	1700.6	7704.36	996.343	10070.3	2926.96	3811.19	1246.35	6502.52	1891	1437.59	1729.74	3720.76	1999.39	826.581	3239.32	1679.1	1496.91	2970.07	3108.13	6908.79	3098.43	789.652	4638.66	2375.24	2545.52	1410.79	5455.3	2221.69	8426.68	5885.32	3782.38	2328.87	9499.36	1924.21	906.093	4166.74	2582.66
UNINTEGRATED|g__Oribacterium.s__Oribacterium_sp_ACB1	0	0	10919.6	0	0	0	0	0	0	0	0	0	0	0	0	3069.75	0	0	0	0	0	0	0	0	0	0	0	0	0	0	0	0	0	0	0	0	4458.01	0	0	0	0	0	0	0	0	0	0
UNINTEGRATED|g__Oribacterium.s__Oribacterium_sp_ACB8	0	0	0	0	0	0	0	0	0	6521.62	0	0	0	0	0	0	0	3103.95	0	0	0	0	0	0	0	0	0	0	0	0	0	0	0	0	0	0	0	0	0	0	0	0	0	0	0	0	0
UNINTEGRATED|g__Oribacterium.s__Oribacterium_sp_oral_taxon_078	0	286.367	0	0	0	0	0	0	0	0	0	798.584	0	0	0	0	0	0	0	0	0	0	625.113	141.954	0	0	0	0	0	371.981	346.519	0	0	280.521	0	0	188.762	0	0	351.932	464.288	623.755	0	0	0	0	0
UNINTEGRATED|g__Parvimonas.s__Parvimonas_micra	0	3788.65	1932.6	0	0	1908.74	1842.2	0	5535.38	882.607	9866.37	0	1137.26	2804.04	4315.06	1553.67	0	0	1640.16	0	0	1454.49	3899.05	712.572	511.012	2633.45	0	1470.6	0	387.205	882.458	1958.88	0	1204.29	2815.87	1128.47	2504.85	1270.42	0	0	1040.55	4807.11	1023.69	2727.07	2020.66	0	0
UNINTEGRATED|g__Parvimonas.s__Parvimonas_sp_oral_taxon_110	0	0	0	0	0	0	0	0	0	0	0	0	0	0	0	11110.8	0	0	0	0	0	0	0	1336.59	0	0	0	0	0	0	0	0	0	0	0	3696.55	0	0	0	0	0	0	0	0	0	0	0
UNINTEGRATED|g__Peptostreptococcaceae_noname.s__Eubacterium_yurii	0	356.458	0	0	0	0	0	0	0	0	0	0	0	415.006	0	0	0	0	324.584	0	0	0	83.0078	129.396	0	0	0	0	0	0	193.015	0	0	0	0	0	125.05	0	0	0	127.982	0	0	0	0	168.77	0
UNINTEGRATED|g__Peptostreptococcus.s__Peptostreptococcus_stomatis	302.41	436.124	1470.33	921.641	0	0	1001.76	722.838	621.378	531.311	1220.36	233.082	382.94	0	0	461.807	1979.94	710.328	381.896	674.375	310.976	498.299	2325.49	676.676	887.259	1278.46	0	0	406.366	301.44	0	717.342	336.745	224.773	1510.11	0	999.201	379.926	0	0	0	860.998	0	1340.36	779.675	326.107	0
UNINTEGRATED|g__Porphyromonas.s__Porphyromonas_catoniae	223.606	733.738	378.386	453.588	0	0	931.997	955.386	570.34	1154.18	448.712	610.658	0	0	1084.68	464.203	1710.31	873.855	2006.76	2207.97	604.474	223.714	597.023	1243.04	563.804	993.518	1148.91	958.486	316.364	221.185	1034.81	0	0	847.153	925.317	204.299	2121.23	381.831	0	0	1409.1	2785.46	685.33	1079.88	1039.4	775.984	349.861
UNINTEGRATED|g__Porphyromonas.s__Porphyromonas_endodontalis	0	0	0	0	0	1285.53	0	0	0	0	750.17	0	0	1029.61	780.323	0	0	336.977	1593.11	0	0	0	0	0	0	711.139	187.48	0	0	0	0	1078.17	0	0	0	0	0	1644.99	0	0	424.511	872.705	607.928	381.871	970.179	0	138.234
UNINTEGRATED|g__Porphyromonas.s__Porphyromonas_gingivalis	0	0	0	0	0	0	0	0	0	0	0	0	0	0	241.71	0	0	0	0	0	0	0	0	0	0	0	0	0	0	0	0	0	0	0	0	0	0	0	0	0	0	0	0	0	0	0	0
UNINTEGRATED|g__Porphyromonas.s__Porphyromonas_sp_oral_taxon_279	0	23344.2	12460.8	5879.01	4323.67	0	20980.1	21146.3	15661.9	13521.2	32332	11586.6	0	10405.2	1406.65	459.869	62810.2	20517.1	10551.2	9887.68	3422.76	6341.9	3302.53	1159.23	3592.36	11873.5	0	32132.1	24068.9	7670.93	21440.4	0	1221.89	19944.1	27687.7	2451.47	38432.8	8740.19	638.78	7253	61170.9	23228	1816.56	13257	4871.89	3969.56	1917.34
UNINTEGRATED|g__Prevotella.s__Candidatus_Prevotella_conceptionensis	0	0	0	0	0	0	0	0	0	0	0	1638.33	0	1442.43	0	0	1815.26	0	0	0	0	0	1224.7	932.903	0	1614.55	0	0	0	0	1033.11	0	0	573.751	0	0	0	644.567	0	0	0	1952.18	0	1417.06	0	0	0
UNINTEGRATED|g__Prevotella.s__Prevotella_buccae	0	0	0	0	0	0	0	0	0	0	0	0	0	0	953.944	0	0	0	0	0	0	0	3432.68	0	0	0	0	0	0	0	0	0	0	0	0	0	0	0	0	0	0	0	0	1318.98	1688.81	0	0
UNINTEGRATED|g__Prevotella.s__Prevotella_denticola	3140.11	3793.56	0	3250.47	0	1281.64	2858.21	0	2809.75	5815.49	1995.01	4718.57	4307.67	0	2779.84	2405.7	0	1508.55	0	0	0	0	0	6860.9	0	0	0	0	0	0	0	0	0	0	0	0	0	0	0	0	1177.48	0	0	3637.37	2939.36	0	3428.49
UNINTEGRATED|g__Prevotella.s__Prevotella_histicola	187016	5173.16	8509.05	10330.6	228804	54212	7183.69	31487.4	23849.2	153330	3744.01	20640.7	89448.8	18535.1	178223	64933.6	15575.7	6175.92	5989	4139.89	30101.1	66643.8	33158.9	68005.3	78016.4	0	0	3096.11	23269.8	33852.9	4579.21	93203.2	28963.3	1532.17	8538.29	184527	0	2790.27	32473.3	26209.9	3505.97	3843.02	9094.32	18991.5	57988.9	46884.3	118688
UNINTEGRATED|g__Prevotella.s__Prevotella_intermedia	0	0	0	0	0	0	0	0	1586.84	0	0	0	0	0	384.396	0	0	0	0	0	697.857	0	2269.53	0	0	3215.1	0	0	0	0	0	5404.76	0	0	991.396	0	0	1781.48	0	0	1250.27	866.734	1371.53	0	952.145	0	0
UNINTEGRATED|g__Prevotella.s__Prevotella_loescheii	0	3582.42	0	783.263	0	0	1226.51	0	0	0	874.722	0	0	934.567	458.378	0	0	598.906	1948.1	1169.92	691.146	0	1848.6	544.291	0	0	670.533	0	0	523.616	0	0	1141.27	0	0	0	1403.3	522.092	0	0	1368.9	0	0	616.127	707.333	1159.5	0
UNINTEGRATED|g__Prevotella.s__Prevotella_maculosa	0	0	0	3194.07	0	0	1027.93	1658.35	0	0	1184.56	1691.44	0	0	1727.92	0	1182.08	821.23	1634.85	0	0	2108.1	1680.73	1410.66	0	1848.07	0	0	0	1861.49	929.525	0	0	431.24	0	2682.91	0	0	0	1122.88	602.74	1404.64	0	1491.6	1879.36	1867.53	0
UNINTEGRATED|g__Prevotella.s__Prevotella_marshii	0	0	0	0	0	0	1058.53	0	0	0	735.247	0	0	0	0	0	0	0	418.24	0	0	838.536	0	0	0	0	0	0	0	0	0	0	0	0	0	0	0	0	0	0	0	1449.28	0	0	549.182	0	0
UNINTEGRATED|g__Prevotella.s__Prevotella_melaninogenica	39219.5	91879.2	36334.3	118315	27813.1	25864.7	41285.4	110378	117018	145039	16816.6	34190.3	16781.6	38738.1	21262.2	28316	83843	17766.7	50963.6	49170.5	72305.1	22104.8	23263.9	22397.8	135451	91678.1	21812.8	28511.7	52402.9	30775.1	12815.5	3677.38	40933.2	17207	50126.4	21089.4	15289.6	9732.07	32474.9	26890.3	33969.8	37568.3	17216.6	46497.8	24185.7	51564.7	75100.4
UNINTEGRATED|g__Prevotella.s__Prevotella_micans	0	0	0	0	0	0	0	0	0	0	553.635	656.426	0	0	433.913	265.261	2073.82	0	632.555	0	0	658.474	477.753	862.758	0	650.907	0	0	0	0	0	0	0	0	0	0	0	0	0	0	0	1867.63	0	612.302	614.792	1263.83	0
UNINTEGRATED|g__Prevotella.s__Prevotella_multiformis	0	0	0	0	0	0	0	0	0	0	0	0	2323.24	0	0	0	0	0	0	0	0	0	0	0	0	0	0	0	0	0	0	0	0	0	0	0	0	0	0	0	0	0	0	0	0	0	0
UNINTEGRATED|g__Prevotella.s__Prevotella_nanceiensis	6553.45	7982.42	2105.99	2779.21	6823.68	3934.7	1896.8	4176.84	3098.69	22393.4	3221.25	1757.93	2354.4	2729.19	1430.27	675.828	4269.56	1610.49	2497.45	3377.77	1661.9	4178.64	456.875	1601.06	3159.29	9159.22	901.187	4435.43	4514.38	20583.6	5329.43	0	3583.51	5659.83	2954.25	0	4703.15	4557.1	2473.84	2012.78	5360.8	2354.42	1532.71	2956.26	1280.18	1251.77	1414.87
UNINTEGRATED|g__Prevotella.s__Prevotella_nigrescens	4576.24	15701.3	2007.65	6761.14	6497	4924.73	12294.9	0	6152.19	0	2809.33	10902.2	6704.16	4185.32	5838.59	3264.53	2148.79	8762.35	5756.36	3825.47	0	3269.78	11379.3	12312.2	6006.24	13317.6	2069.31	2315.44	2629.27	4648.69	3821.05	3179.45	0	3372.83	7108.62	5321.55	242.611	1385.46	1821.15	1987.92	3636.74	2290.27	4376.21	7473.32	18247.3	8462.76	4327.06
UNINTEGRATED|g__Prevotella.s__Prevotella_oralis	0	0	0	0	0	0	0	0	0	0	0	0	816.974	0	533.101	0	0	0	0	0	0	0	0	0	0	0	0	0	0	0	0	0	0	0	0	0	0	0	0	0	0	0	0	0	0	0	0
UNINTEGRATED|g__Prevotella.s__Prevotella_oris	8378.83	10304	4589.1	10183.9	6050.79	2179.08	4557.82	0	3274.64	10452	3111.36	6014.73	15483.6	4166.92	14672.2	8646.66	3185.25	3999.94	5336.52	2126.85	5715.52	7732.76	4430.12	4826.73	4178.2	7516.86	4275.72	1553.3	2977.87	4460.97	768.914	8446.3	0	1731.77	0	8785.23	3159.12	5086.71	1199.72	2585.36	1844.91	4439.38	7000.38	5416.01	16523.8	5765.31	4854.43
UNINTEGRATED|g__Prevotella.s__Prevotella_oulorum	703.196	677.995	2517.31	5153.27	1365.35	0	1031.27	718.403	746.884	1055.23	754.771	1002.5	3312.79	280.164	2327.45	748.564	556.089	515.651	654.204	447.684	276.11	1599.45	401.9	291.484	1995.96	0	642.345	358.586	425.014	730.558	400.111	919.326	3279.64	202.438	0	1509.02	384.376	664.429	447.857	2916.96	227.925	1680.12	4976.49	1161.28	1510.55	2613.82	966.713
UNINTEGRATED|g__Prevotella.s__Prevotella_pallens	55302.2	42034.2	36005.9	71387	62654.7	9708.19	27250.8	64646.4	93491.3	67088.5	78889.7	14061	24961.7	26417	14817	47863.2	72953.4	31114.4	15429.9	23727.5	24290.5	44982.3	16488.8	68452.7	73935	67529	0	7858.34	7294.29	22486.4	7959.62	14298.6	56105.7	3631.29	120028	11351.2	1411.41	5486.62	18555.1	10917.6	11036.4	42909.9	20169.9	43807.9	36183.6	38065.6	0
UNINTEGRATED|g__Prevotella.s__Prevotella_pleuritidis	0	0	437.276	1486.34	0	0	0	0	0	0	764.207	626.48	0	0	0	0	0	0	0	0	0	0	3467.01	0	0	806.118	0	341.46	960.635	520.915	1741.53	978.577	0	0	0	0	0	0	0	0	787.71	0	469.83	0	1039.6	0	0
UNINTEGRATED|g__Prevotella.s__Prevotella_saccharolytica	0	325.865	0	765.135	0	0	0	0	0	0	0	0	0	0	0	124.064	907.828	544.021	1047.08	358.571	252.819	1213.71	638.5	344.317	0	756.988	0	0	0	0	187.318	0	0	0	0	0	171.512	0	0	0	204.454	653.027	0	0	522.18	604.88	0
UNINTEGRATED|g__Prevotella.s__Prevotella_salivae	112779	2360.23	2142.8	74650.3	41225.1	10427.7	15156.7	26953.8	13722.3	29460.1	21419.2	5729.72	97832	13344.1	22807.5	19542.8	9685.53	4950.12	5579.62	19015.7	14715.8	48683.9	11524.4	21369.1	50196.8	35866.8	706.106	1260.61	1473.75	22939.2	1218.7	17906	22982.3	1334.27	24714.2	23675.4	1651.48	1185.98	12876.1	4670.7	3046.37	8652.93	5210.5	12346.6	18968.6	16521.1	8572.57
UNINTEGRATED|g__Prevotella.s__Prevotella_sp_C561	0	0	0	0	0	0	0	0	31281.4	0	0	0	0	0	0	0	0	0	0	0	0	59205.2	0	25151.9	0	0	0	0	0	0	0	0	0	0	0	0	0	0	11739.1	0	0	0	0	0	0	0	0
UNINTEGRATED|g__Prevotella.s__Prevotella_sp_oral_taxon_306	0	0	0	0	24649.5	0	0	0	0	0	0	0	0	0	0	21722.2	0	0	0	0	0	0	0	6219.67	0	16086.8	0	0	0	0	0	0	0	0	0	0	0	0	19078.1	0	0	0	0	0	0	0	0
UNINTEGRATED|g__Prevotella.s__Prevotella_veroralis	14891.4	3624.52	2975.57	9814.49	13625.9	3042.56	5085.21	26101.5	5858.9	15664.1	4052.86	6045.67	9860.43	10806.2	8744.2	5938.71	8068.88	3253.91	0	0	0	13616	4444.14	0	17012	8347.71	1754.79	0	0	5847.46	0	1913.94	0	1483.31	0	41363.2	0	1681.59	0	0	1509.97	4253.01	5352.9	3667.73	12210.6	8121.48	0
UNINTEGRATED|g__Propionibacterium.s__Propionibacterium_acnes	0	0	0	0	0	0	0	0	0	0	0	0	0	0	0	0	0	0	0	0	0	0	0	218.793	0	0	0	0	0	0	0	0	0	0	0	0	0	0	0	0	0	0	0	0	0	0	0
UNINTEGRATED|g__Propionibacterium.s__Propionibacterium_propionicum	0	244.678	0	0	0	0	0	0	0	0	0	933.58	0	0	0	0	734.702	0	408.915	238.355	538.134	0	1419.52	622.712	0	0	114.067	434.083	378.184	0	190.112	0	0	0	0	0	715.682	0	238.349	0	1156.8	0	0	0	0	271.887	0
UNINTEGRATED|g__Rothia.s__Rothia_aeria	0	550.528	822.752	0	0	4086.15	1681.02	958.192	537.945	0	1145.76	5146.43	0	339.209	229.603	1954.77	919.713	1911.89	4091.51	2272.62	4443.37	298.441	3793.33	1598.04	517.403	1261.08	42174.3	5444.33	2047.05	1397.22	3538.34	938.732	998.747	7798.05	304.505	880.979	3852.31	2041.46	2618.14	4893.78	1970.8	1041.06	2511.47	991.839	427.25	1445.05	690.413
UNINTEGRATED|g__Rothia.s__Rothia_dentocariosa	405.463	0	407.275	0	0	6891.68	1152.15	157.315	1580.79	0	1488.86	2630.7	0	1345.81	671.664	883.19	1690.82	825.114	1617.48	761.717	2139.62	452.011	6888.63	331.805	765.943	0	19930.4	2707.98	744.395	2251.8	591.811	8803.35	4070.78	12171.2	508.226	2249.36	4748.57	0	9892	1730.1	1251.15	1824.55	1872.52	997.845	993.434	0	964.567
UNINTEGRATED|g__Rothia.s__Rothia_mucilaginosa	708.472	15281.5	3130.29	261.944	1267.58	12098.2	2419.28	605.561	2618.9	208.986	3420.39	15075.8	355.551	41721.3	859.098	831.134	1741.14	1471.59	17091	5502.8	43861.6	1222.52	95867.7	1814.51	2894.43	1081.92	26135.9	28879.3	66755.4	30643.1	36380.7	13052.6	9106.97	54608.7	1171.75	2199.1	14831.9	3310.36	17153.3	9212.96	25187	3694.02	2227.72	2160.65	287.993	1411.18	1375.52
UNINTEGRATED|g__Scardovia.s__Scardovia_wiggsiae	1016.8	760.863	105.042	866.222	417.707	1232.72	0	449.002	931.943	481.436	546.318	868.733	629.617	0	952.58	146.745	0	1780.61	372.486	0	0	2108.69	0	4164.41	0	0	0	0	0	0	0	0	0	260.172	0	830.388	0	0	141.771	0	0	323.959	700.028	4034.81	5954.22	679.685	1094.78
UNINTEGRATED|g__Selenomonas.s__Selenomonas_artemidis	0	906.132	0	0	0	0	0	0	0	0	0	0	0	188.695	229.641	0	816.611	0	243.252	252.039	0	0	200.221	910.864	0	0	0	0	511.433	0	464.596	221.386	522.038	116.166	0	0	0	0	333.363	0	0	608.802	258.512	0	0	0	0
UNINTEGRATED|g__Selenomonas.s__Selenomonas_flueggei	1459.97	0	3080.95	5221.32	2642.98	0	1213.94	0	1363.03	1163.58	2483.33	893.7	4031.83	1006.17	831.21	0	386.539	522.065	727.358	4568.1	2689.69	3680.64	1212.47	924.593	2302.95	0	0	0	0	269.035	0	9800.61	21850.3	0	0	225.82	0	0	2679.43	2346.1	913.613	1411.38	3661.66	0	1207.47	2471.46	0
UNINTEGRATED|g__Selenomonas.s__Selenomonas_infelix	0	673.224	0	0	0	0	574.586	0	0	0	0	0	0	0	0	0	0	0	2472.76	683.234	0	1044.59	699.045	491.27	0	0	0	0	0	0	0	0	0	0	0	0	0	0	0	841.565	0	1559.68	0	503.386	0	675.982	0
UNINTEGRATED|g__Selenomonas.s__Selenomonas_noxia	0	1777.67	0	4630.15	0	453.915	880.099	679.128	475.8	0	626.932	827.976	1363.54	634.606	323.587	491.004	2903.87	1291.87	2129.03	756.007	0	981.827	526.898	2145.64	0	800.221	438.48	0	324.248	543.668	242.28	2331.45	2007.08	528.496	0	545.364	169.91	782.929	966.862	1258.4	343.674	2112.48	7589.39	1672.75	1078.18	3067.52	3402.61
UNINTEGRATED|g__Selenomonas.s__Selenomonas_sputigena	0	0	0	354.217	0	0	0	0	0	0	0	766.319	468.56	0	0	0	0	0	345.272	3038.92	0	1123.56	1401.19	0	0	531.826	0	0	0	0	0	0	1413.67	0	679.433	0	0	0	0	655.549	0	958.162	1488.33	0	661.624	585.784	0
UNINTEGRATED|g__Shuttleworthia.s__Shuttleworthia_satelles	275.685	688.067	0	0	0	0	374.76	0	0	0	0	1030.11	657.462	0	312.264	0	0	0	0	0	0	263.887	0	0	0	529.057	171.569	0	0	339.352	0	0	0	0	0	352.858	0	0	0	0	0	0	0	440.442	585.082	602.403	0
UNINTEGRATED|g__Solobacterium.s__Solobacterium_moorei	11279.5	5552.71	5926.61	15018.7	15088.5	3741.08	10032.7	37447.1	12856.6	6371.71	11829.4	5824.18	11011	2574.43	4736.13	12159.7	11883.1	5197.47	3325.17	2050.52	8683.05	16773.3	5157.56	37580.2	11815.8	16572.1	2493.96	1519.96	2042.73	2810.34	1679.89	4144.78	3572.9	2460.25	19459.5	7817.38	3474.92	2593.96	2205.82	4833.31	4096.09	9324.37	9381.77	14320.4	8147.25	15534.6	2603.76
UNINTEGRATED|g__Stomatobaculum.s__Stomatobaculum_longum	0	306.289	928.72	0	462.567	0	0	229.648	0	0	323.481	786.95	0	286.414	0	214.777	0	220.187	89.859	62.8696	320.515	450.238	492.112	513.37	291.558	0	0	0	669.254	481.792	127.61	0	387.191	303.544	382.866	284.282	0	0	377.054	214.205	253.5	255.639	237.73	0	0	0	0
UNINTEGRATED|g__Streptococcus.s__Streptococcus_anginosus	0	0	0	0	0	0	0	0	0	0	0	0	0	0	1072.5	0	0	0	0	0	0	0	683.069	0	0	0	0	0	0	330.766	0	327.186	0	0	0	0	0	0	0	0	0	0	0	0	0	0	0
UNINTEGRATED|g__Streptococcus.s__Streptococcus_australis	0	7858.92	5496.94	796.35	221.254	0	2426.59	397.354	0	0	948.972	1767.53	0	2124.99	0	556.694	1463.09	1123.42	1966.74	1311.93	1039.22	1392.34	1126.78	567.307	1023.4	339.859	4855.02	3370.96	8953.58	2957.14	8865.5	0	1100.44	15478.8	1928.09	0	6568.85	9550.69	855.818	2538.08	8026.77	3474.57	0	503.29	783.264	2137.62	763.731
UNINTEGRATED|g__Streptococcus.s__Streptococcus_constellatus	0	0	0	379.167	0	0	0	0	0	295.29	934.995	0	0	0	0	283.02	0	365.221	0	0	0	738.337	0	0	0	449.339	637.662	0	0	427.823	0	328.125	0	0	0	0	244.859	0	0	0	0	525.614	0	0	0	0	0
UNINTEGRATED|g__Streptococcus.s__Streptococcus_cristatus	0	305.601	957.599	304.906	0	815.323	1053.75	0	471.741	0	1484.61	904.103	0	444.971	524.486	0	1532.26	1189.79	1610.18	768.503	0	1330.91	1167.85	0	0	0	10300.6	830.388	1011.5	717.924	1128.44	0	476.904	732.42	1737.68	0	473.923	742.496	0	1157.5	516.744	2958.1	1007.43	0	427.604	1859.06	0
UNINTEGRATED|g__Streptococcus.s__Streptococcus_gordonii	0	433.878	0	0	794.539	1702.53	0	0	0	633.287	628.681	875.152	975.18	438.32	790.429	442.718	970.391	2399.81	715.756	0	1136.25	895.04	1044.42	121.332	0	0	1891.48	0	0	316.218	0	0	395.768	464.673	0	2063.66	194.175	0	0	546.729	187.914	2522.93	0	829.03	396.801	1538.81	0
UNINTEGRATED|g__Streptococcus.s__Streptococcus_infantis	1572.51	14448.4	5168.32	4332.77	1936.63	4662.98	9680.67	3534.02	3304.64	2175.37	3326.93	9995.21	464.635	18564.2	1697.27	3919.58	4587.17	3334.81	9620.63	3439.67	11089.2	3391.74	12057.6	3140.47	3636.83	1718.15	21031.4	5299.82	8634.34	5856.23	17577.6	0	3757.67	14097.5	9297.2	1299.19	7710.37	25279	2902.61	11379.3	12818.7	9831.37	5332.2	2113.55	3249.14	3708.2	2470.43
UNINTEGRATED|g__Streptococcus.s__Streptococcus_intermedius	1183.7	4889.38	2426.15	1886.52	1868.23	0	931.393	4409.21	1033.65	5893.93	1761.04	1195.08	1061.66	2554.23	5511.24	9154.91	9548.34	2883.04	1640.7	1249.92	161.014	2660.4	577.138	1441.1	476.652	819.914	5523.29	488.324	1076.74	1965.32	2381.59	1968.46	2064.64	2195.71	1868.14	3096.22	1399.22	503.628	1433.64	1955.27	542.279	1605.38	1250.34	4360.31	4262.65	353.337	827.963
UNINTEGRATED|g__Streptococcus.s__Streptococcus_mitis_oralis_pneumoniae	8966.13	24975.4	16274.2	6305.41	7322.1	36005.8	32683.1	26415.1	15388.9	31552.2	15586.6	42275.4	9746.67	21876.3	34889.4	26028.1	22603.4	25816	38933.8	22740	44917.6	15841.1	21792.6	6032.59	11669.8	8541.68	79538.9	45300.2	16836.1	7241.98	58208	25891.4	29043.2	62845.8	14700.7	18151.5	28515.6	22950.4	26506.3	73312.1	10950.5	40092.7	30485	7110.99	19708.7	9716.43	5928.3
UNINTEGRATED|g__Streptococcus.s__Streptococcus_mutans	0	0	0	0	0	0	0	0	0	0	0	0	0	0	562.284	0	0	0	0	0	0	120.932	0	225.089	0	0	0	0	0	0	0	3537.64	0	0	0	1123.03	0	0	235.389	0	0	0	0	0	859.669	452.687	0
UNINTEGRATED|g__Streptococcus.s__Streptococcus_oligofermentans	0	500.775	0	0	0	519.104	597.192	0	0	0	713.323	541.707	0	0	0	0	632.71	848.912	898.938	0	0	390.543	550.055	0	0	0	3709.38	204.105	573.143	0	586.706	0	0	0	0	0	231.504	0	0	716.741	451.789	1374.83	0	0	0	673.383	0
UNINTEGRATED|g__Streptococcus.s__Streptococcus_parasanguinis	23758.5	3477.36	2526.91	2171.51	4703.15	10798.3	5204.64	1153.17	5742.78	5503.45	1736.72	9057.24	6143.27	20700.1	6959.98	8827.87	2533.51	2633.35	6052.62	2312	24108.8	3602.4	34371.3	4803.75	6064.92	1990.21	17750.3	5905.13	15403.3	27605.8	4157.36	18076.4	6495.08	9468.67	2458.27	15653.4	2633.82	12087.1	9312.09	10641.5	8176.83	14271.1	4183.67	2200.71	4149.76	9018.28	11651.6
UNINTEGRATED|g__Streptococcus.s__Streptococcus_peroris	0	0	0	0	0	0	0	506.218	0	0	150.104	738.121	0	967.328	402.731	0	0	390.073	700.477	0	755.188	0	0	0	0	0	1147.79	0	344.507	0	0	820.756	0	783.61	800.579	0	399.899	1214.83	299.087	394.303	0	628.986	0	0	0	274.004	149.118
UNINTEGRATED|g__Streptococcus.s__Streptococcus_pseudopneumoniae	0	0	0	0	0	0	0	0	0	0	0	0	0	0	0	0	0	1184.03	1683.37	1887.79	0	0	0	0	0	0	0	0	0	0	0	2260.88	0	0	0	0	2190.17	0	0	0	0	0	1207.52	0	0	0	0
UNINTEGRATED|g__Streptococcus.s__Streptococcus_pyogenes	0	0	0	0	0	0	0	0	0	0	0	0	0	0	0	0	0	0	0	0	0	0	0	172.103	0	0	0	0	0	0	0	316.131	0	0	0	0	0	0	0	0	0	0	0	0	0	0	0
UNINTEGRATED|g__Streptococcus.s__Streptococcus_salivarius	14700.1	6258.58	0	681.493	3251.1	6284.69	7630.57	1902.05	2584.14	3506.35	5209.29	10921.1	4253.93	9604.31	5031.92	2204.45	3727.26	3827.53	6943.11	2703.78	10007.6	4156.61	13580.6	2634.44	1895.34	1744.83	29824	8809.34	7968.83	11924	4941.09	38357.8	4302.05	14165.9	3466.74	8333.14	8815.07	13119	6936.02	11259.2	7307.29	5953.88	3255.14	3200.86	7484.74	8768.36	5035.4
UNINTEGRATED|g__Streptococcus.s__Streptococcus_sanguinis	3912.1	4266.23	21355.3	1713.87	1390.47	30756.9	14991.4	6762.69	4636.28	9810.06	9169.23	18229.7	3531.47	3716.75	7579.49	7212.74	3018.85	18972	13325.4	5999.68	7164.4	8851.62	13154.3	4428.12	2001.23	3516.52	27496.3	13011.3	7332.12	8886.32	18762.9	3235.87	13497.9	21967.3	2173.39	6085.36	15827.5	5482.26	5530.02	19239.2	9119.35	4218.59	11317.2	7947	17810	5349.28	2722.04
UNINTEGRATED|g__Streptococcus.s__Streptococcus_sobrinus	0	0	0	0	0	0	0	0	0	0	0	0	0	0	529.912	0	0	0	0	0	0	759.977	0	0	0	0	0	0	0	0	0	0	0	0	0	0	0	0	0	0	0	0	0	0	0	0	0
UNINTEGRATED|g__Streptococcus.s__Streptococcus_sp_M334	0	0	0	0	0	0	0	0	0	0	0	0	0	0	0	0	0	0	0	0	8085.57	0	0	0	0	0	0	0	0	0	0	0	4953.54	0	0	0	0	0	0	0	0	0	0	0	0	0	0
UNINTEGRATED|g__Streptococcus.s__Streptococcus_sp_SK140	0	0	0	0	0	0	0	0	0	0	0	0	0	4451.08	0	0	0	0	0	0	0	0	0	764.385	0	0	0	0	0	0	0	0	0	0	0	0	1850.66	0	0	0	0	0	0	0	0	0	0
UNINTEGRATED|g__Streptococcus.s__Streptococcus_thermophilus	0	0	899.63	0	0	0	0	0	0	0	0	0	0	0	0	0	0	0	0	0	0	0	0	0	0	0	0	0	0	0	0	0	0	0	0	0	0	0	0	0	0	0	0	0	0	0	0
UNINTEGRATED|g__Streptococcus.s__Streptococcus_tigurinus	0	0	0	0	277.245	2406.14	1119.31	762.65	583.278	0	923.507	0	0	0	1794.41	0	911.128	1075.62	0	0	1296.18	1085.27	0	0	826.879	0	2886.49	1006.38	0	0	1145.68	594.026	646.627	0	731.443	0	631.523	1617.95	828.111	2382.24	282.028	1586.76	0	0	826.659	0	0
UNINTEGRATED|g__Streptococcus.s__Streptococcus_vestibularis	0	0	0	0	0	0	0	0	0	0	0	0	0	0	146.554	0	0	0	0	0	0	0	0	0	0	0	2010.31	0	0	562.78	0	1344.61	0	0	0	0	0	452.93	0	0	0	0	0	0	187.893	0	0
UNINTEGRATED|g__Tannerella.s__Tannerella_forsythia	0	0	0	0	0	0	0	0	0	0	0	0	0	0	131.202	0	0	0	0	0	0	0	0	0	0	0	0	0	0	105.806	0	0	0	0	0	0	0	0	0	0	0	0	370.335	0	0	0	0
UNINTEGRATED|g__Treponema.s__Treponema_denticola	0	0	0	0	0	0	0	0	0	0	0	0	0	0	622.741	0	0	0	3777.17	0	0	0	0	0	0	453.768	0	0	0	989.814	0	0	0	0	0	0	0	0	0	0	0	0	0	0	0	0	0
UNINTEGRATED|g__Treponema.s__Treponema_lecithinolyticum	0	0	0	0	0	0	0	0	0	0	0	301.269	0	0	0	0	0	0	0	0	0	0	0	0	0	0	0	0	0	0	0	0	0	0	0	0	0	0	0	0	0	0	0	0	433.106	0	0
UNINTEGRATED|g__Treponema.s__Treponema_maltophilum	0	0	0	0	0	0	0	0	0	0	0	0	0	0	0	0	0	0	121.112	0	0	0	0	0	0	0	0	0	0	0	0	0	0	0	0	0	0	0	0	0	0	0	0	0	0	0	0
UNINTEGRATED|g__Treponema.s__Treponema_medium	0	833.07	0	0	0	0	0	0	0	0	0	0	0	123.852	284.824	0	0	0	573.331	370.111	0	0	1374.56	0	0	0	0	0	0	181.991	0	0	332.667	0	0	0	0	1337.26	0	0	375.998	0	0	269.654	1123.56	0	0
UNINTEGRATED|g__Treponema.s__Treponema_socranskii	0	254.026	190.299	0	0	0	0	0	0	0	0	569.817	357.142	0	168.851	0	0	0	276.085	0	0	0	624.469	90.5051	0	146.167	400.518	0	0	0	217.293	283.129	810.182	0	0	0	0	1133.77	0	0	0	0	242.945	0	154.382	342.472	0
UNINTEGRATED|g__Treponema.s__Treponema_vincentii	0	0	0	0	0	0	0	0	0	0	0	0	0	0	0	0	0	0	0	0	0	0	422.501	0	0	0	0	0	0	0	0	0	0	0	0	0	0	0	0	0	0	471.921	0	0	0	0	0
UNINTEGRATED|g__Veillonella.s__Veillonella_atypica	57432.4	7456.55	30282.2	19125.5	77572.9	40422.7	9616.92	20776.7	14527.4	10383.5	7324.68	12872.8	17273	31939.7	34040.5	35072.3	6607.18	11670.1	17728.4	24344	14025.1	25726.7	22276.5	28928.4	39378.5	10458.2	2390.2	1697.71	9869.12	30697.5	2578.43	52603.3	30828.3	5378.96	5961.02	73548.6	1438.64	1881.4	32148.8	26646.2	7850.66	9178.78	58137.9	8227.2	17248.4	72968.5	30130.7
UNINTEGRATED|g__Veillonella.s__Veillonella_dispar	12143.5	8074.66	40873.9	17839.2	19103.8	41900.3	6701.74	20861.9	14501.5	11034.2	4767.59	21148	13190.8	26438.9	12091.5	12841.7	6731.19	10775.5	13187.9	10717.4	36472.9	6531.44	20302.1	12529.6	18900.7	6211.63	7800.97	8200.21	35649.9	43255.9	6937.12	15652.8	15277.6	9583.34	7371.75	17297	6754.32	2973.6	36820.2	27252.9	20711.5	7815.87	20532.4	20495.3	10617	41763.6	33887.7
UNINTEGRATED|g__Veillonella.s__Veillonella_parvula	4820.06	17922.3	38155.4	15976.5	8099.79	20044.5	4599.17	11966.5	10431.3	18347.9	5884.94	18666.8	12491.1	4723.42	23942.5	11859.4	25365	25114.9	15981.2	13274.7	6035.37	6899.23	9263.08	15506.1	5286.69	5340.22	19873.2	8273.49	15007.6	21474.3	11679	16188.3	6158.13	13144.1	4629.81	24635.3	5482.38	6523.5	11132.8	8905.92	12432.6	6805.38	8600.87	24585.6	25066.9	32998.5	14778.4
UNINTEGRATED|g__Veillonella.s__Veillonella_sp_6_1_27	0	0	0	0	0	0	0	0	0	0	0	0	0	0	0	0	0	0	0	0	0	0	0	0	0	0	0	0	0	0	0	0	0	7472.22	0	0	0	0	6516.08	0	0	0	0	0	0	0	0
UNINTEGRATED|g__Veillonella.s__Veillonella_sp_HPA0037	0	0	0	0	0	0	0	0	0	0	0	0	0	0	0	0	0	0	0	0	0	0	0	0	0	0	0	0	0	0	0	42024.7	0	0	0	0	0	0	0	0	0	0	0	0	0	0	0
UNINTEGRATED|g__Veillonella.s__Veillonella_sp_oral_taxon_158	0	0	0	0	0	0	0	0	0	0	0	0	0	0	0	0	0	0	0	0	0	0	0	0	0	0	0	0	0	0	0	0	0	0	0	0	0	0	0	0	0	18629.7	0	0	0	0	0
UNINTEGRATED|g__Veillonella.s__Veillonella_sp_oral_taxon_780	0	0	0	0	0	0	0	0	0	2113.22	0	0	0	0	1143.71	0	0	0	1616.94	0	2731.74	0	0	0	0	0	0	0	0	0	0	0	0	0	0	0	2503	0	1542.73	0	0	0	0	0	2168.55	0	0
UNINTEGRATED|unclassified	62279.7	97123.7	92904.2	70007.1	60900.1	54034.1	65103.4	86983.3	87927.1	58437.4	68785	62858.1	43737.2	61975.4	48745	73191.9	79727.5	42572.3	53964.9	85487.4	84659	64685.8	57086.9	75903.9	73579.3	92613.7	49102.7	51312.5	66752.6	65351.2	45791.3	44661.3	74319.3	50710.5	87948.5	68507.5	96330.7	44143.1	49542.7	54884.7	80963.9	52561.6	47080.5	79641.7	41131.7	82002.5	38114.3
1CMET2-PWY: N10-formyl-tetrahydrofolate biosynthesis	273.708	256.886	259.108	186.106	143.459	317.405	222.828	226.871	152.015	249.934	147.224	316.471	167.803	286.881	231.809	208.933	189.076	178.986	216.15	176.293	313.464	149.794	337.966	166.334	173.071	119.697	379.727	249.385	276.842	332.944	306.601	294.26	293.871	350.355	186.615	263.589	210.647	287.273	267.236	372.149	252.51	253.375	204.183	164.731	228.407	281.705	242.509
1CMET2-PWY: N10-formyl-tetrahydrofolate biosynthesis|g__Acidovorax.s__Acidovorax_ebreus	0	0	0	0	0	0	0	0	0	0	0	0	0	0	0	0	0	0	0	0	0	0	0	0.610643	0	0	0	0	0	0	0	0	0	0	0	0	0	0	0	0	0	0	0	0	0	0	0
1CMET2-PWY: N10-formyl-tetrahydrofolate biosynthesis|g__Escherichia.s__Escherichia_coli	0	0	0	0	0	0	0	0	0	0	0	0	0	0	0	0	0	0	0	0	0	0	0	0.136885	0	0	0	0	0	0	0	0	0	0	0	0	0	0	0	0	0	0	0	0	0	0	11.2406
1CMET2-PWY: N10-formyl-tetrahydrofolate biosynthesis|g__Haemophilus.s__Haemophilus_haemolyticus	0	0	0	0	0	0	0	0	0	0	0	0	0	0	0.458678	0	0	0	0	0	0	0	0	0	0	0	0	0	0	0	0	0	0	0	0	0	0	0	0	1.21318	0	0	0	0	0	0	0
1CMET2-PWY: N10-formyl-tetrahydrofolate biosynthesis|g__Haemophilus.s__Haemophilus_influenzae	0	0	0	0	0	8.88843	0	0	0	0	0	0	0	1.33137	0	5.3615	0	0	0	0	0.998954	0	0	0	0	0	0	0	0	0	0	0	3.45673	0	0	0	0	0	0	0	0	0	0	0	0	0	0
1CMET2-PWY: N10-formyl-tetrahydrofolate biosynthesis|g__Neisseria.s__Neisseria_cinerea	0	0	0	0	0	0	0	0	0	0	0	0	0	0	0	0	0	0	0	0	0.629206	0	0	0	0	0	0	0	0	0	0	0	0	0	0	0	0	0	0	0	0	0	0	0	0	0	0
1CMET2-PWY: N10-formyl-tetrahydrofolate biosynthesis|g__Streptococcus.s__Streptococcus_gordonii	0	0.999206	0	0	0	0	0	0	0	0	0	0	0	0	0.527541	0	0	3.01023	0	0	0	0	1.24202	0.0713813	0	0	0	0	0	0	0	0	0	0	0	0	0	0	0	0	0	2.9147	0	0	0	0	0
1CMET2-PWY: N10-formyl-tetrahydrofolate biosynthesis|g__Streptococcus.s__Streptococcus_parasanguinis	22.1262	1.52642	0	0	4.56674	10.5784	4.40692	0	4.74503	2.90905	2.19639	8.94202	4.02544	18.1763	7.5584	8.36812	0	0	4.94878	0	26.8213	2.76339	41.8703	4.30948	5.15352	0	20.0467	0	12.2133	25.9796	2.78314	18.9471	5.72618	5.41032	0	18.0233	0.554965	10.484	11.0323	11.1446	7.25141	13.1777	3.68619	2.28112	3.91964	10.1438	11.5993
1CMET2-PWY: N10-formyl-tetrahydrofolate biosynthesis|g__Streptococcus.s__Streptococcus_sanguinis	2.23602	3.72512	17.0484	0	0	27.9577	12.7745	2.22965	2.41975	10.8385	10.1381	18.7385	0	2.2897	5.87871	5.01109	3.30946	15.2992	16.5453	5.9175	4.49682	7.47807	12.1463	3.55871	0	0	32.0287	9.84311	3.4532	8.8142	18.6388	0	12.0129	16.5751	0	4.34675	14.4567	2.78942	5.72846	21.3047	8.09258	2.16708	7.94049	4.96499	19.4786	3.81248	2.62442
1CMET2-PWY: N10-formyl-tetrahydrofolate biosynthesis|g__Veillonella.s__Veillonella_sp_oral_taxon_158	0	0	0	0	0	0	0	0	0	0	0	0	0	0	0	0	0	0	0	0	0	0	0	0	0	0	0	0	0	0	0	0	0	0	0	0	0	0	0	0	0	26.5695	0	0	0	0	0
1CMET2-PWY: N10-formyl-tetrahydrofolate biosynthesis|unclassified	22.1385	52.353	67.8344	16.1216	17.7604	0	18.71	31.6201	0	25.0582	17.8046	25.6311	0	29.7033	12.9525	8.81053	24.7894	19.0066	29.9192	27.0173	34.8444	0	29.0209	17.7981	0	11.4697	9.78692	0	38.7493	30.5321	24.4362	0	33.4352	27.5819	37.668	0	38.0352	32.0734	16.8329	19.306	46.2884	0	21.6696	41.3361	18.407	48.9592	17.4269
ALL-CHORISMATE-PWY: superpathway of chorismate metabolism	0	0	0	0	0	0	0	0	0	0	0	0	0	0	0	0	0	0	0	0	0	0	0	2.38671	0	0	0	0	0	0	0	0	0	0	0	0	0	0	0	0	0	0	0	0	0	0	0
ALLANTOINDEG-PWY: superpathway of allantoin degradation in yeast	0	0	0	0	0	0	0	0	0	0	0	0	0	0	0	0.590289	0	0	0	0	0	0	0	0.214562	0	0	0	0	0	0	0	0	0	0	0	0	0	0	0	0	0	0	0	0	0	0	0
ANAEROFRUCAT-PWY: homolactic fermentation	206.548	209.498	162.575	186.516	141.785	215.904	172.084	164.547	120.725	129.332	188.186	287.056	152.8	265.765	182.09	205.374	134.944	190.501	173.714	190.373	240.11	173.891	294.28	185.838	182.991	136.384	247.78	317.866	265.773	333.973	298.806	136.787	206.144	321.83	147.765	215.723	218.214	332.473	236.975	309.384	308.913	236.366	117.515	177.57	164.177	140.214	166.655
ANAEROFRUCAT-PWY: homolactic fermentation|unclassified	0	41.6725	0	18.7471	0	0	14.3205	0	0	0	0	18.1603	0	8.4126	8.00762	0	0	0	0	17.3183	0	0	21.5848	13.8405	0	0	9.156	0	23.4782	23.0581	16.346	0	0	15.0857	0	0	37.133	0	0	0	30.5592	19.3688	0	0	0	0	0
ANAGLYCOLYSIS-PWY: glycolysis III (from glucose)	344.799	399.95	365.694	302.401	229.074	315.789	278.984	305.878	175.829	181.729	275.19	422.721	315.113	403.933	244.547	284.593	199.447	251.997	289.728	241.31	426.554	297.017	422.218	293.171	293.546	278.354	313.85	415.816	497.714	496.568	450.6	270.452	284.378	557.501	242.73	318.825	385.624	495.108	310.988	393.655	480.567	322.547	162.144	250.178	244.935	193.868	289.41
ANAGLYCOLYSIS-PWY: glycolysis III (from glucose)|g__Actinomyces.s__Actinomyces_sp_oral_taxon_448	0	0	0	0	0	0	0	0	0	0	0	0	0	0	3.31232	0	0	0	0	0	0	0	0	0.242771	0	0	0	0	0	0	0	0	0	0	0	0	0	0	0	0	0	0	0	0	0	0	0
ANAGLYCOLYSIS-PWY: glycolysis III (from glucose)|g__Escherichia.s__Escherichia_coli	1.44684	0	0	0	0	0	0	0	0	0	0	0	0	0	0	0.55108	0	0	0	0	0	0	0	0.360457	0	0	0	0	0	0	0	0	0	0	0	0	0	0	0	0	0	0	0	0	0	0	36.0012
ANAGLYCOLYSIS-PWY: glycolysis III (from glucose)|g__Fusobacterium.s__Fusobacterium_necrophorum	0	0	0	0	0	0	0	0	0	0	0	0	0	0	0	0	0	0	0	0	0	0	0	0	0	0	0	0	0	0	0	8.10083	0	0	0	0	0	0	0	0	0	0	0	0	0	0	0
ANAGLYCOLYSIS-PWY: glycolysis III (from glucose)|g__Fusobacterium.s__Fusobacterium_nucleatum	0	5.67122	0	0	0	0	1.76162	2.06652	1.87505	0	2.34077	5.85879	2.81519	5.47547	2.29076	1.53834	3.90447	7.41392	8.08058	5.13319	2.13389	0	9.31407	7.15141	0.926741	2.16531	5.7347	0	2.2738	4.53834	11.7034	5.20586	3.06445	4.59185	0	2.81869	2.22101	10.1639	3.07567	3.40415	4.90444	7.44682	0	4.86619	2.90707	1.88035	1.59492
ANAGLYCOLYSIS-PWY: glycolysis III (from glucose)|g__Haemophilus.s__Haemophilus_haemolyticus	0	0	0	0	0	0	1.00184	0	0	0.981048	0	0	0	0	0.649369	0	0	0	0	0.731252	0	0	0	0	0.825248	0	0	4.17084	0	0	1.21827	0	1.07362	0.701549	0	0	0.82293	0	0	0	0.771222	0	0	0	0	0	0
ANAGLYCOLYSIS-PWY: glycolysis III (from glucose)|g__Haemophilus.s__Haemophilus_influenzae	0	0	0	0	0	6.11785	0	0	0	0	0	0	0	1.67336	0	3.55822	0	0	0	0	0	0	0	0	0	0	0	0	0	0	0	0	6.64676	0	0	0	0.552454	0	0	0	0	0	0	0	0	0	0
ANAGLYCOLYSIS-PWY: glycolysis III (from glucose)|g__Haemophilus.s__Haemophilus_parainfluenzae	2.54889	19.4375	51.6308	18.087	7.84807	17.1727	18.09	11.55	14.6418	8.25758	8.49637	16.2226	7.13092	57.517	15.7197	5.58921	8.22874	20.0206	19.4189	25.9457	24.2173	11.0459	16.4699	18.6096	17.2194	11.8475	9.993	56.6087	100.559	84.73	77.2284	1.44996	18.9646	110.42	8.70555	11.0121	40.1613	57.8802	50.0422	19.7895	76.7351	7.80994	3.23471	19.0089	10.8122	4.79266	22.1314
ANAGLYCOLYSIS-PWY: glycolysis III (from glucose)|g__Streptococcus.s__Streptococcus_australis	0	7.63638	5.52715	0	0	0	5.34992	0.92974	0	0	1.13706	2.2974	0	3.05422	0	0	0	0	3.89141	0.979164	1.34018	1.74017	0	0.76031	0	0	7.00108	3.46177	6.88208	4.7005	10.3131	0	1.97881	17.6776	2.71371	0	6.17068	8.97782	0	5.15022	8.90265	4.85984	0	0	0	0	0
ANAGLYCOLYSIS-PWY: glycolysis III (from glucose)|g__Streptococcus.s__Streptococcus_infantis	0	17.9458	6.45578	4.22264	1.81993	5.76253	9.41527	0	5.35407	2.68493	4.68769	11.464	0	21.1407	2.24736	7.49805	7.39024	4.62846	11.4893	3.98335	17.289	4.36332	18.3837	3.94263	4.50235	0	23.1317	7.0855	14.1645	7.9505	20.4269	0	4.44356	11.4414	12.3739	0	10.6228	18.3415	3.71615	18.6652	16.495	15.37	7.06454	2.67595	0	3.51074	4.6276
ANAGLYCOLYSIS-PWY: glycolysis III (from glucose)|g__Streptococcus.s__Streptococcus_mitis_oralis_pneumoniae	8.01338	23.7478	14.8145	3.33057	2.50714	18.9522	18.1001	16.9354	5.52542	24.9137	12.1337	47.3279	5.849	17.8569	26.4726	19.861	19.2602	20.3065	28.7772	14.2705	25.9815	12.6199	20.1623	4.74798	6.96567	5.37682	47.069	31.7034	17.9504	6.99739	41.4599	15.464	17.5735	49.0451	16.1035	13.2074	20.2195	26.7025	19.0697	55.121	12.5421	35.262	21.4753	6.65347	17.0188	8.76796	0
ANAGLYCOLYSIS-PWY: glycolysis III (from glucose)|g__Streptococcus.s__Streptococcus_pseudopneumoniae	0	0	0	0	0	0	0	0	0	0	0	0	0	0	0	0	0	0	2.4169	3.28129	0	0	0	0	0	0	0	0	0	0	0	0	0	0	0	0	2.16387	0	0	0	0	0	0	0	0	0	0
ANAGLYCOLYSIS-PWY: glycolysis III (from glucose)|g__Streptococcus.s__Streptococcus_sp_M334	0	0	0	0	0	0	0	0	0	0	0	0	0	0	0	0	0	0	0	0	13.2402	0	0	0	0	0	0	0	0	0	0	0	11.3855	0	0	0	0	0	0	0	0	0	0	0	0	0	0
ANAGLYCOLYSIS-PWY: glycolysis III (from glucose)|g__Streptococcus.s__Streptococcus_sp_SK140	0	0	0	0	0	0	0	0	0	0	0	0	0	6.61205	0	0	0	0	0	0	0	0	0	1.16069	0	0	0	0	0	0	0	0	0	0	0	0	3.47029	0	0	0	0	0	0	0	0	0	0
ANAGLYCOLYSIS-PWY: glycolysis III (from glucose)|unclassified	0	51.7751	0	26.039	0	0	24.461	29.0895	28.8124	0	24.6256	25.5909	0	16.5649	8.5248	0	0	0	22.1027	15.3779	0	0	27.7856	26.6763	19.7426	0	8.33414	19.8661	26.7589	36.9133	20.3384	0	0	15.1541	0	0	55.9162	0	0	0	35.214	29.0047	0	25.662	0	0	0
ARG+POLYAMINE-SYN: superpathway of arginine and polyamine biosynthesis	63.496	116.409	104.21	76.3503	62.4871	81.2748	63.0125	78.6242	48.8539	52.8182	59.0162	135.723	65.5375	112.309	59.8776	41.9536	83.2892	104.394	91.0162	115.899	101.776	65.6028	86.5252	97.7033	45.3678	67.2009	73.6479	69.8597	93.1672	132.429	74.7038	112.999	138.156	110.162	51.6265	95.9154	35.1194	69.8427	125.283	107.48	98.5372	71.6289	31.9346	100.552	96.4066	102.974	85.3655
ARG+POLYAMINE-SYN: superpathway of arginine and polyamine biosynthesis|g__Escherichia.s__Escherichia_coli	0	0	0	0	0	0	0	0	0	0	0	0	0	0	0	0	0	0	0	0	0	0	0	0.18243	0	0	0	0	0	0	0	0	0	0	0	0	0	0	0	0	0	0	0	0	0	0	17.0158
ARG+POLYAMINE-SYN: superpathway of arginine and polyamine biosynthesis|unclassified	0	0	0	0	0	0	0	0	0	0	0	0	0	0	0	0	0	0	0	0	0	0	6.91711	4.89876	0	0	0	0	0	0	0	0	0	0	0	0	7.95015	0	0	0	0	0	0	0	0	0	0
ARGDEG-PWY: superpathway of L-arginine, putrescine, and 4-aminobutanoate degradation	0	0	0	0	0	0	0	0	0	0	0	0	0	0	0	0.546807	0	0	0	0	0	0	0	0.515594	0	0	0	0	0	0	0	0	0	0	0	0	0	0	0	0	0	0	0	0	0	0	27.4318
ARGDEG-PWY: superpathway of L-arginine, putrescine, and 4-aminobutanoate degradation|g__Escherichia.s__Escherichia_coli	0	0	0	0	0	0	0	0	0	0	0	0	0	0	0	0.351614	0	0	0	0	0	0	0	0.255442	0	0	0	0	0	0	0	0	0	0	0	0	0	0	0	0	0	0	0	0	0	0	24.5997
ARGININE-SYN4-PWY: L-ornithine de novo biosynthesis	0	0	0	0	0	2.70128	0	0	0	0	5.90782	3.43971	5.73754	3.54188	1.90645	0	3.97574	0	6.83047	0.895239	4.65282	0	4.88215	1.51822	0	0	2.67305	0	0	0	2.66618	3.85833	0	0	0	0	2.31386	3.61752	0	0	4.69521	2.16681	0	1.13206	2.31504	2.24806	0
ARGININE-SYN4-PWY: L-ornithine de novo biosynthesis|g__Propionibacterium.s__Propionibacterium_propionicum	0	0	0	0	0	0	0	0	0	0	0	2.01106	0	0	0	0	0	0	0	0.562831	1.15885	0	1.61649	0.922196	0	0	0	0	0	0	0	0	0	0	0	0	1.24123	0	0	0	1.19778	0	0	0	0	0	0
ARGORNPROST-PWY: arginine, ornithine and proline interconversion	0	0	0	0	0	11.9922	0	0	0	0	8.54801	7.66959	3.61329	10.8503	6.09596	0	2.46014	0	10.9943	3.63019	11.7245	0	6.55101	5.79027	0	0	0	0	0	0	10.7155	8.84535	0	0	0	0	8.95541	9.10171	0	0	4.54848	8.08409	0	3.15872	5.19985	4.26452	0
ARGSYN-PWY: L-arginine biosynthesis I (via L-ornithine)	130.777	213.049	348.118	147.362	176.927	293.223	111.482	155.373	134.555	124.174	98.8067	296.069	124.067	229.328	162.877	155.258	140.884	173.759	172.949	183.25	245.212	120.454	243.292	166.306	144.396	86.9238	222.636	293.107	293.31	327.139	264.535	239.565	247.023	314.45	84.6139	218.654	179.504	254.688	305.279	293.59	276.401	154.751	190.654	196.673	171.337	300.652	244.691
ARGSYN-PWY: L-arginine biosynthesis I (via L-ornithine)|g__Acidovorax.s__Acidovorax_ebreus	0	0	0	0	0	0	0	0	0	0	0	0	0	0	0	0	0	0	0	0	0	0	0	0.862528	0	0	0	0	0	0	0	0	0	0	0	0	0	0	0	0	0	0	0	0	0	0	0
ARGSYN-PWY: L-arginine biosynthesis I (via L-ornithine)|g__Actinomyces.s__Actinomyces_oris	0	0	0	0	0	0	0	0	0	0	0	3.53711	0	0	0	0	0	0	0	0	0	0	0.714322	0.62385	0	0	0	0	0	0.730008	0.735179	0	0	1.83372	0	0	0	0	0	0	0.4072	0	0	0	0	0	0
ARGSYN-PWY: L-arginine biosynthesis I (via L-ornithine)|g__Actinomyces.s__Actinomyces_viscosus	0	0	0	0	0	0	0	0	0	0	0	5.09267	0	0	0.895637	0	0	0	0	0	0.687907	0	0	1.46708	0.523695	0	3.20421	5.25361	3.24827	0.972987	0	1.45891	0	1.15642	0	0	0	0	0	0	0	0	0	0	0	0	1.15071
ARGSYN-PWY: L-arginine biosynthesis I (via L-ornithine)|g__Bifidobacterium.s__Bifidobacterium_longum	0	0	0	0	0	0	0	0	0	0	0	0	0	0	0	0	0	0	0	0	0	0	0	0	0	0	0	0	0	0	0	0	0	0	0.850155	0	0	0	0	0	0	0	0	0	0	0	0
ARGSYN-PWY: L-arginine biosynthesis I (via L-ornithine)|g__Enhydrobacter.s__Enhydrobacter_aerosaccus	0	0	0	0	0	0	0	0	0	0	0	0	0	0	0	0	0	0	0	0	0	0	0	0.182602	0	0	0	0	0	0	0	0	0	0	0	0	0	0	0	0	0	0	0	0	0	0	0
ARGSYN-PWY: L-arginine biosynthesis I (via L-ornithine)|g__Escherichia.s__Escherichia_coli	0	0	0	0	0	0	0	0	0	0	0	0	0	0	0	0	0	0	0	0	0	0	0	0.301601	0	0	0	0	0	0	0	0	0	0	0	0	0	0	0	0	0	0	0	0	0	0	35.6984
ARGSYN-PWY: L-arginine biosynthesis I (via L-ornithine)|g__Haemophilus.s__Haemophilus_parahaemolyticus	0	0	0	0	0	0	0	0	0	0	0	0	0	0	0	0	0	0	0	0	0	0	0	0	0	0	0	0	0	0	0	0	0	1.76295	0	0	0	0	0	0	0	0	0	0	0	0	0
ARGSYN-PWY: L-arginine biosynthesis I (via L-ornithine)|g__Haemophilus.s__Haemophilus_paraphrohaemolyticus	0	0	0	0	0	0	0	0	0	0	0	0	0	0	0	0	0	0	0	0	2.23265	0	0	0	0	0	0	0	0	0	0	0	0	0	0	0	1.08545	0	0	0	0	0	0	0	0	0	0
ARGSYN-PWY: L-arginine biosynthesis I (via L-ornithine)|g__Haemophilus.s__Haemophilus_sputorum	0	0	0	0	0	0	0	0	0	0	0	1.15738	0	1.09314	0	0	0	0	1.05221	1.27727	0	0	0	0.161848	0	0	0	0	0	1.27312	3.73871	0	0	0	0	0	1.78971	0	2.3575	0	0	0	0	0	0	0	0
ARGSYN-PWY: L-arginine biosynthesis I (via L-ornithine)|g__Lautropia.s__Lautropia_mirabilis	0	0	0.775297	0	0	0	0	0	0	0	0	5.68023	0	0	0.468601	0	0	3.21478	0	0.742678	3.31426	0	2.96015	0.390127	0	0	0	8.11489	6.0086	2.7551	18.7281	5.82251	1.7678	7.61636	0	0	2.14045	10.0753	10.6153	7.47869	2.47043	0	0	0	0	0	0
ARGSYN-PWY: L-arginine biosynthesis I (via L-ornithine)|g__Neisseria.s__Neisseria_elongata	0	0	0	0	0	0	0	0	0	0	0	0	0	0	0	0	0	0	0	0	0.612608	0	0	0.537997	0	0	0	0	0	0	0	0	0	3.20202	0	0	0.561648	6.29166	1.92492	0.567575	0	0	0	0	0	0	0
ARGSYN-PWY: L-arginine biosynthesis I (via L-ornithine)|g__Neisseria.s__Neisseria_flavescens	0	1.82966	0	0	0	0	0	0	0	0	0	0	0	3.41261	0.303445	0	0	1.72733	2.43553	3.4651	0	0	0.628154	1.29385	0	4.22958	0	29.132	0	4.53465	3.49791	0	0	13.6048	0	0	4.34126	21.0607	1.63076	7.06004	10.7222	3.21221	0	0.816846	0	0	0
ARGSYN-PWY: L-arginine biosynthesis I (via L-ornithine)|g__Neisseria.s__Neisseria_sicca	0	1.5817	0	1.25108	0	0	0	0	0	0	0	12.0701	2.75424	0	0.402619	0	1.14413	2.29288	3.99722	2.67828	2.94518	0	5.85914	2.57668	0	0	12.095	30.5823	0	0	6.13275	0	2.42106	9.96431	0	0	3.48407	0	1.14069	16.0893	3.32087	3.5039	0	2.07793	1.66804	0	0
ARGSYN-PWY: L-arginine biosynthesis I (via L-ornithine)|g__Streptococcus.s__Streptococcus_mutans	0	0	0	0	0	0	0	0	0	0	0	0	0	0	0	0	0	0	0	0	0	0	0	0	0	0	0	0	0	0	0	3.90565	0	0	0	1.7464	0	0	0	0	0	0	0	0	0	0	0
ARGSYN-PWY: L-arginine biosynthesis I (via L-ornithine)|g__Veillonella.s__Veillonella_dispar	28.9939	0	113.197	29.4969	39.4929	82.1043	19.3181	42.7565	32.8099	24.2739	9.03584	52.866	23.4433	59.2746	23.9398	28.8186	15.3714	24.3317	31.0391	27.2721	74.4977	16.5522	55.758	26.4646	38.8714	13.3585	0	21.4028	81.7269	98.2241	21.9978	29.4802	37.353	31.6465	15.4647	40.474	22.2382	6.73233	68.8068	51.2262	74.404	15.3754	41.3226	49.5161	25.3106	86.0049	72.4393
ARGSYN-PWY: L-arginine biosynthesis I (via L-ornithine)|g__Veillonella.s__Veillonella_parvula	7.78749	17.9345	30.4321	22.7766	9.73301	26.0765	1.78505	13.5357	14.4662	21.1274	5.78031	30.6921	13.3206	4.15245	33.2813	17.0366	31.176	30.0346	17.2733	12.1716	6.71261	10.4657	8.11061	20.8977	4.52163	5.60452	16.6705	7.21803	12.5568	24.7367	10.9578	20.8829	4.76776	18.0573	4.79422	33.1701	1.53292	7.47846	17.4028	15.6564	8.88933	8.91727	9.90302	27.1797	33.8186	45.2993	20.1986
ARGSYN-PWY: L-arginine biosynthesis I (via L-ornithine)|g__Veillonella.s__Veillonella_sp_6_1_27	0	0	0	0	0	0	0	0	0	0	0	0	0	0	0	0	0	0	0	0	0	0	0	0	0	0	0	0	0	0	0	0	0	2.31726	0	0	0	0	3.35858	0	0	0	0	0	0	0	0
ARGSYN-PWY: L-arginine biosynthesis I (via L-ornithine)|unclassified	0	0	0	0	0	0	0	0	0	0	0	0	0	0	0	0	0	0	0	0	0	0	6.7794	7.59412	0	0	0	0	0	0	0	0	0	0	0	0	12.8875	0	0	0	0	0	0	0	0	0	0
ARGSYNBSUB-PWY: L-arginine biosynthesis II (acetyl cycle)	63.3458	88.6092	16.233	30.1879	28.6327	51.8205	60.0311	38.9229	21.2772	23.0021	39.4491	174.981	37.1984	112.612	28.2236	15.7105	44.9267	73.7898	72.7313	106.765	99.7769	24.7034	111.286	66.8781	11.8852	52.3248	149.167	281.947	93.6725	111.962	218.444	150.848	95.8455	237.22	34.5616	57.6591	98.5481	233.777	133.541	223.5	195.673	43.6698	7.50829	58.744	60.4098	36.2198	272.102
ARGSYNBSUB-PWY: L-arginine biosynthesis II (acetyl cycle)|g__Acidovorax.s__Acidovorax_ebreus	0	0	0	0	0	0	0	0	0	0	0	0	0	0	0	0	0	0	0	0	0	0	0	0.8902	0	0	0	0	0	0	0	0	0	0	0	0	0	0	0	0	0	0	0	0	0	0	0
ARGSYNBSUB-PWY: L-arginine biosynthesis II (acetyl cycle)|g__Actinomyces.s__Actinomyces_oris	0	0	0	0	0	0	0	0	0	0	0	3.30973	0	0	0	0	0	0	0	0	0	0	0.848544	0.351407	0	0	0	0	0	0.860092	0.849982	0	0	2.09961	0	0	0	0	0	0	0.386752	0	0	0	0	0	0
ARGSYNBSUB-PWY: L-arginine biosynthesis II (acetyl cycle)|g__Actinomyces.s__Actinomyces_viscosus	0	0	0	0	0	0	0	0	0	0	0	4.70241	0	0	0.702645	0	0	0	0	0	0.812822	0	0	1.28944	0.577051	0	2.72045	4.20532	3.54055	0.98827	0	1.48039	0	1.14247	0	0	0	0	0	0	0	0	0	0	0	0	1.26162
ARGSYNBSUB-PWY: L-arginine biosynthesis II (acetyl cycle)|g__Bifidobacterium.s__Bifidobacterium_longum	0	0	0	0	0	0	0	0	0	0	0	0	0	0	0	0	0	0	0	0	0	0	0	0	0	0	0	0	0	0	0	0	0	0	0.845956	0	0	0	0	0	0	0	0	0	0	0	0
ARGSYNBSUB-PWY: L-arginine biosynthesis II (acetyl cycle)|g__Enhydrobacter.s__Enhydrobacter_aerosaccus	0	0	0	0	0	0	0	0	0	0	0	0	0	0	0	0	0	0	0	0	0	0	0	0.153264	0	0	0	0	0	0	0	0	0	0	0	0	0	0	0	0	0	0	0	0	0	0	0
ARGSYNBSUB-PWY: L-arginine biosynthesis II (acetyl cycle)|g__Escherichia.s__Escherichia_coli	0	0	0	0	0	0	0	0	0	0	0	0	0	0	0	0	0	0	0	0	0	0	0	0.213233	0	0	0	0	0	0	0	0	0	0	0	0	0	0	0	0	0	0	0	0	0	0	40.6913
ARGSYNBSUB-PWY: L-arginine biosynthesis II (acetyl cycle)|g__Lautropia.s__Lautropia_mirabilis	0	0	0.675784	0	0	0	0	0	0	0	0	5.21509	0	0	0.520402	0	0	3.08883	0	0.655265	3.10357	0	3.16437	0.421006	0	0	0	8.2859	5.40771	1.93754	19.3162	5.42045	1.78418	7.1614	0	0	2.18677	9.21294	10.8961	7.52202	2.4132	0	0	0	0	0	0
ARGSYNBSUB-PWY: L-arginine biosynthesis II (acetyl cycle)|g__Neisseria.s__Neisseria_elongata	0	0	0	0	0	0	0	0	0	0	0	0	0	0	0	0	0	0	0	0	0.692321	0	0	0.592373	0	0	0	0	0	0	0	0	0	2.38597	0	0	0.514802	5.88687	2.09193	0.542073	0	0	0	0	0	0	0
ARGSYNBSUB-PWY: L-arginine biosynthesis II (acetyl cycle)|g__Neisseria.s__Neisseria_flavescens	0	1.7126	0	0	0	0	0	0	0	0	0	0	0	2.79204	0.341791	0	0	2.02703	2.47036	3.83565	0	0	0.772852	1.39596	0	4.35022	0	31.0682	0	4.54589	2.58994	0	0	12.498	0	0	4.10295	17.019	1.63386	7.35364	8.57863	3.12135	0	0.915393	0	0	0
ARGSYNBSUB-PWY: L-arginine biosynthesis II (acetyl cycle)|g__Neisseria.s__Neisseria_sicca	0	1.17949	0	1.36149	0	0	0	0	0	0	0	12.6386	3.107	0	0.473113	0	1.35044	2.70967	3.83125	3.12622	3.37639	0	6.36111	2.38018	0	0	12.3347	35.0207	0	0	6.06511	0	2.75523	11.473	0	0	4.07056	0	1.26514	18.8279	3.59491	3.70963	0	2.0726	1.7452	0	0
ARGSYNBSUB-PWY: L-arginine biosynthesis II (acetyl cycle)|g__Streptococcus.s__Streptococcus_mutans	0	0	0	0	0	0	0	0	0	0	0	0	0	0	0	0	0	0	0	0	0	0	0	0	0	0	0	0	0	0	0	3.35846	0	0	0	1.59585	0	0	0	0	0	0	0	0	0	0	0
ARGSYNBSUB-PWY: L-arginine biosynthesis II (acetyl cycle)|unclassified	0	0	0	0	0	0	0	0	0	0	0	0	0	0	0	0	0	0	0	0	0	0	6.69218	4.44323	0	0	0	0	0	0	0	0	0	0	0	0	9.16532	0	0	0	0	0	0	0	0	0	0
ARO-PWY: chorismate biosynthesis I	569.095	564.077	498.226	444.379	452.531	432.795	378.83	489.322	584.792	511.551	392.593	552.051	360.791	520.385	401.465	447.454	548.211	374.772	420.118	416.548	560.09	478.525	508.727	499.289	582.016	464.598	460.534	540.757	631.678	605.314	511.079	471.44	516.009	606.786	369.201	507.641	412.238	488.524	546.912	542.411	583.388	436.812	345.125	484.835	389.29	519.943	472.374
ARO-PWY: chorismate biosynthesis I|g__Actinomyces.s__Actinomyces_sp_oral_taxon_448	0	0	0	0	0	0	0	0	0	0	0	0	0	0	1.40166	0	0	0	0	0	0	0	0	0	0	0	0	0	0	0	0	0	0	0	0	0	0	0	0	0	0	0	0	0	0	0	0
ARO-PWY: chorismate biosynthesis I|g__Campylobacter.s__Campylobacter_gracilis	0	0	0	0	0	0	0	0	0	0	0	0	0	0	0	0	0	0	0	0	0	0	0	0.599091	0	0	0	0	0	0	0	0	0	0	0	0	0	0	0	0	0	0	0	0	0	0	0
ARO-PWY: chorismate biosynthesis I|g__Campylobacter.s__Campylobacter_showae	0	5.07498	0	0	0	0	0	0	0	0	0	0	0	0	0	0	0	0	1.1767	1.96256	0	0	0	0.157939	0	0	0	0	0	0	0	0	0	0.568486	0	0	0.4298	0	0.326057	0	0	0	0	0	0	0	0
ARO-PWY: chorismate biosynthesis I|g__Cardiobacterium.s__Cardiobacterium_hominis	0	0	0	0	0	0	0	0	0	0	0	0	0	0	0	0	0	0	0	0	0	0	0	0.369657	0	0	0	0	0	0	0	0	0	0	0	0	0.373822	0	0	0	0	0	0	0	0	0	0
ARO-PWY: chorismate biosynthesis I|g__Clostridiales_Family_XIII_Incertae_Sedis_noname.s__Eubacterium_infirmum	0	0	0	0	0	0	0	0	0	0	0	0	0	0	0	0	0	0	0	0	0	0	0	0	0	0	0	0	0	0	0	0	0	0	0	0	0	0	0	0	0	3.53905	0	0	2.71656	0	0
ARO-PWY: chorismate biosynthesis I|g__Corynebacterium.s__Corynebacterium_matruchotii	0	0	0	0	0	0	0	0	0	0	0	0	0	0	0	0	0	0	0	0	0	0	0	0.220599	0	0	0	0	2.20643	0	0.920592	0	0	0	0	0	0	0	0	0	0	4.99204	0	0	0	0	0
ARO-PWY: chorismate biosynthesis I|g__Cryptobacterium.s__Cryptobacterium_curtum	0	0	0	0	0	0	0	0	0	0	0	3.01005	0	0	0	0	0	0	0	0	0	0	0	0	0	0	0	0	0	0	0	0	0	0	0	1.79046	0	0	0	0	0	0	0	0	0	0	0
ARO-PWY: chorismate biosynthesis I|g__Eikenella.s__Eikenella_corrodens	0	0	0	0	0	0	0	0	0	0	0	0	0	0	0	0	0	0	0	0	0	0	0	0.0674075	0	0	0	0	0	0	0	0	0	0	0	0	0	0	0	0	0	0	0	0	0	0	0
ARO-PWY: chorismate biosynthesis I|g__Enhydrobacter.s__Enhydrobacter_aerosaccus	0	0	0	0	0	0	0	0	0	0	0	0	0	0	0	0	0	0	0	0	0	0	0	0.129681	0	0	0	0	0	0	0	0	0	0	0	0	0	0	0	0	0	0	0	0	0	0	0
ARO-PWY: chorismate biosynthesis I|g__Escherichia.s__Escherichia_coli	0	0	0	0	0	0	0	0	0	0	0	0	0	0	0	1.03361	0	0	0	0	0	0	0	0.261385	0	0	0	0	0	0	0	0	0	0	0	0	0	0	0	0	0	0	0	0	0	0	35.6063
ARO-PWY: chorismate biosynthesis I|g__Haemophilus.s__Haemophilus_haemolyticus	0	0	0	0	0	0	0	0	0	0	0	0	0	0	0.391476	0	0	0	0	0	0	0	0	0	0	0	0	0	0	0	0	0	0	0	0	0	0	0	0	0	0	0	0	0	0	0	0
ARO-PWY: chorismate biosynthesis I|g__Haemophilus.s__Haemophilus_influenzae	0	0	0	0	0	0	0	0	0	0	0	0	0	1.44065	0	4.23196	0	0	0	0	0	0	0	0	0	0	0	0	0	0	0	0	4.92889	0	0	0	0	0	0	0	0	0	0	0	0	0	0
ARO-PWY: chorismate biosynthesis I|g__Haemophilus.s__Haemophilus_parahaemolyticus	0	0	0	0	0	0	0	0	0	0	0	0	0	0	0	0	0	0	0	0	0	0	0	0	0	0	0	0	0	0	0	0	0	1.0386	0	0	0	0	0	0	0	0	0	0	0	0	0
ARO-PWY: chorismate biosynthesis I|g__Haemophilus.s__Haemophilus_parainfluenzae	3.41148	18.923	38.2984	15.7624	4.40998	15.9681	17.2181	10.4972	12.3312	8.62281	10.3649	15.0787	4.83938	53.6174	12.4005	4.48621	7.86152	17.563	20.499	20.6627	18.1302	8.01483	12.7569	16.7094	17.1113	7.61602	8.03735	51.0538	86.3597	76.748	65.359	0	16.3872	98.2392	7.9736	9.27525	32.9661	54.5857	48.4875	15.4748	64.8181	4.81241	2.80028	16.5534	11.1056	5.136	18.274
ARO-PWY: chorismate biosynthesis I|g__Haemophilus.s__Haemophilus_sputorum	0	0	0	0	0	0	0	0	0	0	0	1.47687	0	0	0	0	0	0	0	0	0	0	0	0.127265	0	0	0	0	0	0	3.12687	0	0	0	0	0	0.814539	0	1.3844	0	0	0	0	0	0	0	0
ARO-PWY: chorismate biosynthesis I|g__Kingella.s__Kingella_denitrificans	0	0	0	0	0	0	0	0	0	0	0	0	0	0	0	0	0	0	0	0	0	0	0.760869	0	0	0	0	0	0	0	0	0	0	0	0	0	0	0	0	0	0	0	0	0	0	0	0
ARO-PWY: chorismate biosynthesis I|g__Kingella.s__Kingella_oralis	0	0	0	0	0	0	0	0	0	0	0	0	0	0	0	0	0	0	0	0	0	0	0	0	0	0	0	0	0	0	0	0	0	0.783824	0	0	0	0	0	0	0	0	0	0	0	0	0
ARO-PWY: chorismate biosynthesis I|g__Lachnospiraceae_noname.s__Lachnospiraceae_bacterium_ICM7	0	0	7.057	0	0	0	0	0	0	0	0	0	0	0	0	0	0	0	0	0	0	0	0	0.408637	0	0	0	0	3.83519	0	0	0	0	1.20599	0	0	2.2792	0	0	0	2.49452	0	0	0	0	0	0
ARO-PWY: chorismate biosynthesis I|g__Leptotrichia.s__Leptotrichia_buccalis	0	0	0	0	0	0	0	0	0	0	0	0	0	0	0	0	0	0	0	0	0	0	0	0.371309	0	0	0	0	0	0	0	0	0	0	0	0	0	0	0	0	0	0	0	0	0	0	0
ARO-PWY: chorismate biosynthesis I|g__Leptotrichia.s__Leptotrichia_goodfellowii	0	0	0	0	0	0	0	0	0	0	0	0	0	0	0	0	0	0	0	0	0	0	0	0.590258	0	0	0	0	0	0	0	0	0	0	0	0	0	0	0	0	0	0	0	0	0	0	0
ARO-PWY: chorismate biosynthesis I|g__Leptotrichia.s__Leptotrichia_wadei	0	0	0	0	0	0	0	0	0	0	0	0	0	0	0	0	0	0	0	0	0	0	0	0.594302	0	0	0	0	0	0	0	0	0	0	0	0	0	0	0	0	0	0	0	0	0	0	0
ARO-PWY: chorismate biosynthesis I|g__Neisseria.s__Neisseria_elongata	0	0	0	0	0	0	0	0	0	0	0	0	0	0	0	0	0	0	0	0	2.34417	0	0	0.611218	0	0	0	0	0	0	0	0	0	1.78142	0	0	0.287388	5.40694	1.80917	0	0	0	0	0	0	0	0
ARO-PWY: chorismate biosynthesis I|g__Neisseria.s__Neisseria_flavescens	0	0	0	2.60593	2.41691	0	1.51162	0	0	0	3.39339	3.66327	0	10.4583	0	0	0	0	2.31491	7.3775	0	0	2.76956	2.69379	0	7.18789	4.00511	25.1296	4.14981	3.32006	20.416	0	3.11358	16.5974	0	0	6.12155	54.9188	3.32811	8.4789	21.358	3.23221	0	2.23633	0	0	1.25358
ARO-PWY: chorismate biosynthesis I|g__Neisseria.s__Neisseria_macacae	0	0	0	0	0	0	0	0	0	0	0	1.59184	0	0	0	0	0	1.84594	1.75934	0	0	0	0	0	0	0	2.7937	0	0	0	2.36118	0	0	0	0	0	0	0	0	0	0	2.5449	0	1.38588	0	0	0
ARO-PWY: chorismate biosynthesis I|g__Neisseria.s__Neisseria_sicca	0	0	0	0	0	5.8986	0	0	0	0	1.5383	13.2988	0	0	1.87021	0	1.37101	5.9386	3.18854	4.66791	0	3.68609	5.57151	2.76987	0	0	10.491	33.8057	0	0	2.95	0	0	15.5192	0	2.98618	3.88351	0	0.650688	18.9098	0	5.13602	0	2.31219	2.19455	0	0
ARO-PWY: chorismate biosynthesis I|g__Neisseria.s__Neisseria_sp_oral_taxon_014	0	0	0	0	0	0	0	0	0	0	0	0	0	0	0	0	0	0	0	0	0	0	0	0	0	0	0	0	0	0	0	0	0	0	0	0	0	0	0	0	1.82303	0	0	0	0	0	0
ARO-PWY: chorismate biosynthesis I|g__Neisseria.s__Neisseria_subflava	0	8.33565	0	0	0	0	1.1297	0	0	0	1.85398	2.97728	0	7.51196	0	0	0.924359	0	2.00807	4.13337	0	0	0	3.73858	0	0	0	19.4272	2.6035	10.0401	11.0436	0	6.5406	17.0898	0	0	0	45.9205	2.34792	5.4701	17.888	0	0	0	0	0	0
ARO-PWY: chorismate biosynthesis I|g__Oribacterium.s__Oribacterium_sp_oral_taxon_078	0	0	0	0	0	0	0	0	0	0	0	0	0	0	0	0	0	0	0	0	0	0	0	0	0	0	0	0	0	0	0.568781	0	0	0	0	0	0	0	0	0	0	0	0	0	0	0	0
ARO-PWY: chorismate biosynthesis I|g__Propionibacterium.s__Propionibacterium_propionicum	0	0	0	0	0	0	0	0	0	0	0	0	0	0	0	0	0	0	0	0	0	0	0	0.412712	0	0	0	0	0	0	0	0	0	0	0	0	0	0	0	0	0.485561	0	0	0	0	0	0
ARO-PWY: chorismate biosynthesis I|g__Selenomonas.s__Selenomonas_flueggei	0	0	0	2.45735	0	0	0	0	0	0	0	0	0	0	0	0	0	0	0	0	0	0	0	0.120817	0	0	0	0	0	0	0	0	9.36504	0	0	0	0	0	0	0	0	0	0	0	0	0	0
ARO-PWY: chorismate biosynthesis I|g__Selenomonas.s__Selenomonas_noxia	0	3.84868	0	5.06956	0	0	0	0	0	0	0	0	0	0	0	0	4.51044	0	2.20223	0	0	0	0	2.49675	0	0	0	0	0	0.640864	0	0	0	0	0	0	0	0	1.10238	1.41628	0	2.54988	10.9367	0	0	3.77932	4.21371
ARO-PWY: chorismate biosynthesis I|g__Selenomonas.s__Selenomonas_sputigena	0	0	0	0	0	0	0	0	0	0	0	0	0	0	0	0	0	0	0	0	0	0	2.11242	0	0	0	0	0	0	0	0	0	0	0	0	0	0	0	0	0	0	0	0	0	1.43333	0	0
ARO-PWY: chorismate biosynthesis I|g__Streptococcus.s__Streptococcus_australis	0	7.25973	8.38988	0	0	0	2.6884	0	0	0	0	0	0	0	0	0	0	0	0	0	0	0	0	0.562354	0	0	0	4.94099	0	2.61312	0	0	1.25692	9.22674	0	0	7.72061	0	0	0	6.04991	2.32543	0	0	0	0	0
ARO-PWY: chorismate biosynthesis I|g__Streptococcus.s__Streptococcus_cristatus	0	0	0	0	0	0	0	0	0	0	0	0	0	0	0	0	1.49053	0	1.32357	0	0	0	1.17053	0	0	0	9.90102	0	0	0	1.56492	0	0	0.580528	0	0	0.814231	0	0	1.64506	0	2.17139	0	0	0	1.57442	0
ARO-PWY: chorismate biosynthesis I|g__Streptococcus.s__Streptococcus_gordonii	0	0	0	0	1.0365	0	0	0	0	0	0	0	0	0	0	0	1.2558	3.74703	0	0	0	0	0	0	0	0	3.02574	0	0	0	0	0	0	0	0	0	0	0	0	0	0	2.12754	0	0	0	0	0
ARO-PWY: chorismate biosynthesis I|g__Streptococcus.s__Streptococcus_oligofermentans	0	0	0	0	0	0	0	0	0	0	0	0	0	0	0	0	0	0	0	0	0	0	0	0	0	0	0	0	0	0	0	0	0	0	0	0	0	0	0	0	0	1.24588	0	0	0	0	0
ARO-PWY: chorismate biosynthesis I|g__Streptococcus.s__Streptococcus_parasanguinis	22.5374	3.18487	0	1.30197	3.03852	15.7435	3.26418	0	5.62629	3.54871	0	9.84195	6.94119	20.5806	6.36892	8.61672	2.26135	0	3.53419	2.32568	30.4932	2.02411	38.8327	4.47498	5.12131	2.4935	16.3704	3.76123	12.4913	31.8171	0	16.3427	6.18754	7.57597	0	16.2656	0.934833	9.80209	10.3798	9.21709	8.8134	11.6516	3.58094	1.29191	2.88648	8.72978	14.0415
ARO-PWY: chorismate biosynthesis I|g__Streptococcus.s__Streptococcus_salivarius	0	0	0	0	0	0	3.11355	0	1.29381	0	0	0	0	6.67719	1.18682	0	0	0	2.44426	0	0	0.929774	0	1.35109	0	0	0	0	0	0	0	30.2234	5.10214	3.24251	0	8.56575	0	0	3.09685	1.4355	0	0	0	2.11086	0	0	0
ARO-PWY: chorismate biosynthesis I|g__Streptococcus.s__Streptococcus_sanguinis	4.72206	5.41901	22.7652	0	0	24.3457	16.7081	0	3.5216	7.86306	10.6228	22.233	4.00932	3.13343	6.45336	4.79531	4.3722	21.4605	13.5397	6.05909	4.63971	9.83724	19.298	4.76697	1.6463	4.12738	33.2063	18.7728	8.76541	10.2063	24.3985	2.31212	17.3014	30.1513	0	4.37082	19.5429	5.36876	5.73058	27.1169	10.7426	0	12.4978	6.71987	17.3844	4.61649	0
ARO-PWY: chorismate biosynthesis I|g__Streptococcus.s__Streptococcus_vestibularis	0	0	0	0	0	0	0	0	0	0	0	0	0	0	0	0	0	0	0	0	0	0	0	0	0	0	0	0	0	2.96102	0	0	0	0	0	0	0	1.82964	0	0	0	0	0	0	0	0	0
ARO-PWY: chorismate biosynthesis I|unclassified	65.6887	79.0827	76.739	49.1134	41.5989	0	66.6594	77.1084	121.521	31.5865	98.4395	53.2107	23.5361	38.4302	21.2376	82.7522	109.222	37.0636	36.6692	64.9725	53.9069	87.9367	32.3503	107.914	92.4779	109.239	15.9184	29.3213	39.3243	45.1925	34.0633	29.95	60.2318	37.7623	83.7516	18.6877	71.6912	39.0554	36.0263	32.4693	75.4746	47.9942	14.0076	120.57	29.9792	53.1645	0
ASPASN-PWY: superpathway of L-aspartate and L-asparagine biosynthesis	588.111	420.202	259.697	445.744	591.526	242.366	282.193	452.285	431.899	614.182	197.963	349.968	358.074	335.338	360.497	386.749	377.341	171.863	248.313	308.399	403.931	436.81	290.919	394.531	568.304	371.406	265.681	299.106	365.15	394.628	263.619	329.514	356.435	314.169	288.27	499.724	208.222	271.696	355.642	326.526	338.438	228.469	190.32	300.546	302.198	374.208	395.71
ASPASN-PWY: superpathway of L-aspartate and L-asparagine biosynthesis|g__Actinomyces.s__Actinomyces_georgiae	0	0	0	0	0	0	0	0	0	0	0	0	0	0	0	0	0	0	0	0	0	0	0	1.38547	0	0	0	0	0	0	0	0	0	1.15638	0	0	0	0	0	0	0	0	0	0	0	0	0
ASPASN-PWY: superpathway of L-aspartate and L-asparagine biosynthesis|g__Actinomyces.s__Actinomyces_sp_oral_taxon_448	0	0	0	0	0	0	0	0	0	0	0	0	0	0	3.77557	0	0	0	0	0	0	0	0	0.265863	0	0	0	0	0	0	0	0	0	0	0	0	0	0	0	0	0	0	0	0	0	0	0
ASPASN-PWY: superpathway of L-aspartate and L-asparagine biosynthesis|g__Atopobium.s__Atopobium_rimae	0	6.81532	1.9678	0	0	2.23187	2.8358	0	2.18552	0	1.8751	11.7696	2.93196	0	4.21748	1.24566	0.82416	0.925085	2.23587	0	0	0.708252	0.604667	3.98045	0	0	0	0	0.783741	5.43803	0	0	0	0.485388	0	4.26551	0	0	0.221013	0	0.264589	0.686839	0	4.03182	2.32739	3.11179	0
ASPASN-PWY: superpathway of L-aspartate and L-asparagine biosynthesis|g__Capnocytophaga.s__Capnocytophaga_gingivalis	0	0	1.04396	0	0	0	0	0	0	0	0	0.847848	0	0	0.189018	0	0	0	0	0	0	0	0	0.206988	0	0	0	0	0	0	0.593751	0	0	0.322377	0	0	0	0	0	0	0	0.755791	0	0	0	0	0
ASPASN-PWY: superpathway of L-aspartate and L-asparagine biosynthesis|g__Capnocytophaga.s__Capnocytophaga_granulosa	0	0	0	0	0	0	0	0	0	0	0	0	0	0	0	0	0	0.83467	0	0	0	0	0	0.213887	0	0	0.956501	0	0	0	0.906658	0.780121	0	0	0	0	0	0	0	0.344943	0	0	0	0	0	0	0
ASPASN-PWY: superpathway of L-aspartate and L-asparagine biosynthesis|g__Capnocytophaga.s__Capnocytophaga_ochracea	0	0	0	0	0	0	0	0	0	0	0	0	0	0	0.393113	0	0	0	1.48628	0	0	0.849307	2.01595	1.41815	0	0	0.821885	0	0	0	1.14632	0	0	0	0	0	0	0	0.265012	0	0.178143	0	0	0	0.652283	0.811759	0
ASPASN-PWY: superpathway of L-aspartate and L-asparagine biosynthesis|g__Capnocytophaga.s__Capnocytophaga_sp_oral_taxon_329	0	0	0	0	0	0	0	0	0	0	0	0	0	0	0	0	0	0	0	0	0	0	0	0.646405	0	0	0	0	0	0	0	0	0	0	0	0	0	0	0	0	0	0	0	0	0	0	0
ASPASN-PWY: superpathway of L-aspartate and L-asparagine biosynthesis|g__Escherichia.s__Escherichia_coli	1.01312	0	0	0	0	0	0	0	0	0	0	0	0	0	0	0.927603	0	0	0	0	0.48379	0	0	0.546987	0	0	0	0	0	0	0	0	0	0	0	0.576721	0	0	0	0	0	0	0	0	0	0	32.7173
ASPASN-PWY: superpathway of L-aspartate and L-asparagine biosynthesis|g__Haemophilus.s__Haemophilus_haemolyticus	0	0	2.3542	0	0	0	0.842603	1.00743	0	0.835702	0	0	0	0.995216	0.495642	0	0.988663	0	1.0952	1.70358	0	0	0.518626	0	1.57475	0	0.81379	6.63218	0	0.484195	4.21164	0	3.65078	0.942718	1.11175	0.688187	1.56522	0	1.35458	0	0	0	0	0	0	0	0
ASPASN-PWY: superpathway of L-aspartate and L-asparagine biosynthesis|g__Haemophilus.s__Haemophilus_influenzae	0	0	0	0	0	10.8847	1.16251	0.823125	0	0	0	0	0	3.3017	0.994322	3.07514	0	0	0	2.25638	0.778254	0	1.10039	0	0.921648	0	0.645675	2.77685	0	0.525282	2.1499	0	6.40897	2.79199	0	0.700668	0.954808	0	0.754377	0.594308	0.328604	0.92524	0	0.798351	0	0	0
ASPASN-PWY: superpathway of L-aspartate and L-asparagine biosynthesis|g__Haemophilus.s__Haemophilus_parahaemolyticus	0	0	0	0	0	0	0	0	0	0	0	0	0	0	0	0	0	0	0	0	0	0	0	0	0	0	0	0	0	0	0.712019	1.66715	0	2.61993	0	0	0	0	0	0	0	0	0	0	0	0	0
ASPASN-PWY: superpathway of L-aspartate and L-asparagine biosynthesis|g__Haemophilus.s__Haemophilus_parainfluenzae	1.3318	18.7684	29.7329	17.6092	5.07255	19.2938	14.678	13.8497	13.1245	5.47431	5.95716	16.0118	7.25571	49.5941	13.3474	5.2297	7.8894	14.7851	17.6735	17.4442	17.6057	6.50852	16.4464	14.5677	14.3981	7.40925	9.70731	48.2328	87.3193	75.8474	61.1555	2.89718	18.3726	89.1601	6.36045	8.20582	34.3139	47.7783	45.821	19.2205	66.1733	6.45846	1.84181	14.812	13.8137	3.76761	12.8399
ASPASN-PWY: superpathway of L-aspartate and L-asparagine biosynthesis|g__Haemophilus.s__Haemophilus_paraphrohaemolyticus	0	0	0	0	0	0	0	0	0	0	0	0	0	0	0	0	0	0	0	0	3.727	0	0	0	0	0	0	0	0	0	0	0	0.619254	0	0	0	0.964396	0	0	0	0	0	0	0	0	0	0
ASPASN-PWY: superpathway of L-aspartate and L-asparagine biosynthesis|g__Haemophilus.s__Haemophilus_pittmaniae	0	0	2.56521	0	0	0	0	0	0	0	0	0	0	0	0	0	0	0	0	0	0	0	0	0	0	0	0	0	0	0	0	0	0	0	0	0	0	0	0	0	0	0	0	5.22152	0	0	0
ASPASN-PWY: superpathway of L-aspartate and L-asparagine biosynthesis|g__Haemophilus.s__Haemophilus_sputorum	0	0	0	0	0	0	1.44142	1.1387	0	0	0	1.38715	0	0.984244	0	0	0	0.749949	0	2.12766	0	0	0	0.105374	0	0	0	1.47742	0	2.84824	4.0899	0	0	0	0	0	1.15617	1.3933	1.2686	0.934529	0.207001	0.800609	0	0.781585	0	0	0
ASPASN-PWY: superpathway of L-aspartate and L-asparagine biosynthesis|g__Leptotrichia.s__Leptotrichia_goodfellowii	0	0	0	0	0	0	0	1.60072	0	0	0	0	0	0	0	0.213579	0	0	0	0	0	0	0	0.645994	0	0	0	0	0	0	0.44789	0	0	0.565579	0	0	0	0	0	0	0	0	0	0	0	0	0
ASPASN-PWY: superpathway of L-aspartate and L-asparagine biosynthesis|g__Prevotella.s__Candidatus_Prevotella_conceptionensis	0	0	0	0	0	0	0	0	0	0	0	1.75531	0	1.58639	0	0	0.843279	0	0	0	0	0	0.77567	0.717522	0	0.904719	0	0	0	0	0.922789	0	0	0.348836	0	0	0	1.23158	0	0	0	1.26856	0	1.63866	0	0	0
ASPASN-PWY: superpathway of L-aspartate and L-asparagine biosynthesis|g__Prevotella.s__Prevotella_denticola	1.37415	3.72694	0	0.9499	0	0	1.67692	0	0.894348	1.36346	0	8.85792	5.57222	0	0.663453	1.63083	0	1.89605	0	0	0	0	0	7.49611	0	0	0	0	0	0	0	0	0	0	0	0	0	0	0	0	0	0	0	3.59041	2.64295	0	0
ASPASN-PWY: superpathway of L-aspartate and L-asparagine biosynthesis|g__Prevotella.s__Prevotella_loescheii	0	3.4603	0	0	0	0	0.904357	0	0	0	0.800271	0	0	1.50916	0.270604	0	0	0	3.37993	0	0.968094	0	1.96317	0.662894	0	0	0	0	0	0.516428	0	0	0	0	0	0	0.967447	0	0	0	0.600798	0	0	1.46926	0	1.01101	0
ASPASN-PWY: superpathway of L-aspartate and L-asparagine biosynthesis|g__Prevotella.s__Prevotella_melaninogenica	63.3052	172.087	62.5806	192.88	39.3713	44.508	72.4313	189.29	213.145	244.829	25.1318	73.3358	20.3217	68.2861	30.5492	47.5919	134.168	29.335	80.864	84.7012	124.171	31.0524	40.7336	35.6509	230.421	161.912	44.4129	49.1056	111.239	57.0387	23.6724	2.08817	69.9043	36.6341	81.3882	24.9154	28.873	20.8657	66.3872	54.6628	66.0698	61.2414	30.8703	73.569	39.4358	86.0353	129.069
ASPASN-PWY: superpathway of L-aspartate and L-asparagine biosynthesis|g__Prevotella.s__Prevotella_multiformis	0	0	0	0	0	0	0	0	0	0	0	0	1.46232	0	0	0	0	0	0	0	0	0	0	0	0	0	0	0	0	0	0	0	0	0	0	0	0	0	0	0	0	0	0	0	0	0	0
ASPASN-PWY: superpathway of L-aspartate and L-asparagine biosynthesis|g__Prevotella.s__Prevotella_salivae	133.894	0.823933	0.951467	63.0035	49.0813	6.16909	14.2408	27.49	10.3494	39.3271	18.7054	1.26298	87.6326	11.0389	20.2568	20.9464	7.40055	4.09806	5.64333	16.2148	11.0577	39.1529	8.32475	17.4955	45.4285	25.3397	0	1.73471	0	22.8495	0	23.1231	18.8052	0.410436	24.4118	16.2929	0.918974	0	12.2998	4.16489	1.77573	7.51222	6.15431	7.6325	13.33	15.2012	5.98631
ASPASN-PWY: superpathway of L-aspartate and L-asparagine biosynthesis|g__Prevotella.s__Prevotella_sp_C561	0	0	0	0	0	0	0	0	22.9495	0	0	0	0	0	0	0	0	0	0	0	0	79.2536	0	23.7819	0	0	0	0	0	0	0	0	0	0	0	0	0	0	7.8835	0	0	0	0	0	0	0	0
ASPASN-PWY: superpathway of L-aspartate and L-asparagine biosynthesis|g__Selenomonas.s__Selenomonas_sputigena	0	0	0	0	0	0	0	0	0	0	0	1.00494	1.65111	0	0	0	0	0	0	2.77525	0	2.86205	2.68266	0	0	0.547811	0	0	0	0	0	0	0	0	1.07554	0	0	0	0	0.598046	0	0	3.52833	0	0.790245	1.27714	0
ASPASN-PWY: superpathway of L-aspartate and L-asparagine biosynthesis|g__Streptococcus.s__Streptococcus_mitis_oralis_pneumoniae	0	0	0	0	0	0	0	0	0	0	0	0	0	0	0	4.28021	0	0	0	0	0	0	0	0	0	0	0	0	0	0	0	0	0	0	0	0	0	0	0	0	0	0	0	0	0	0	0
ASPASN-PWY: superpathway of L-aspartate and L-asparagine biosynthesis|unclassified	27.8939	52.4727	43.8467	37.5919	31.0076	0	63.0779	33.4809	40.8433	20.3101	27.7278	24.3674	26.1464	36.5592	20.3345	40.4027	66.0335	17.1519	28.055	87.6603	74.11	39.8241	17.6193	27.2848	19.386	37.344	15.6241	23.4209	30.8954	38.6761	13.1247	19.8477	51.3107	19.3958	73.9026	60.9659	40.4594	26.7535	24.7837	39.7299	44.1116	27.6464	12.5998	53.7036	13.1599	74.3083	16.5499
AST-PWY: L-arginine degradation II (AST pathway)	0.879496	0	0	0	0	0	0	0	0	0	0	0	0	0	0	0.589568	0	0	0	0	0.381397	0	0	0.397266	0	0	0	0	0	0	0	0	0	0	0	0	0	0	0	0	0	0	0	0	0.621938	0	21.9902
AST-PWY: L-arginine degradation II (AST pathway)|g__Acinetobacter.s__Acinetobacter_junii	0	0	0	0	0	0	0	0	0	0	0	0	0	0	0	0	0	0	0	0	0	0	0	0.0559707	0	0	0	0	0	0	0	0	0	0	0	0	0	0	0	0	0	0	0	0	0	0	0
AST-PWY: L-arginine degradation II (AST pathway)|g__Escherichia.s__Escherichia_coli	0.879496	0	0	0	0	0	0	0	0	0	0	0	0	0	0	0.589568	0	0	0	0	0.381397	0	0	0.29551	0	0	0	0	0	0	0	0	0	0	0	0	0	0	0	0	0	0	0	0	0.621938	0	21.9902
BIOTIN-BIOSYNTHESIS-PWY: biotin biosynthesis I	32.6177	58.9763	54.1971	49.0736	18.9314	77.3864	37.7617	75.2942	20.9849	30.8345	79.2446	109.789	0	80.9397	33.9692	51.1441	53.9007	61.9315	78.9329	51.1191	56.3194	44.9694	44.7869	82.1792	31.8542	27.2119	61.4479	66.2218	87.4494	67.9306	81.8596	68.3375	127.085	96.719	44.304	44.2011	49.9248	72.3363	78.689	58.9838	86.4944	58.5632	47.2201	50.6807	39.7993	25.642	117.609
BIOTIN-BIOSYNTHESIS-PWY: biotin biosynthesis I|g__Escherichia.s__Escherichia_coli	0	0	0	0	0	0	0	0	0	0	0	0	0	0	0	0.137387	0	0	0	0	0	0	0	0.198888	0	0	0	0	0	0	0	0	0	0	0	0	0	0	0	0	0	0	0	0	0	0	24.2301
BIOTIN-BIOSYNTHESIS-PWY: biotin biosynthesis I|g__Haemophilus.s__Haemophilus_haemolyticus	0	0	0	0	0	0	0	0	0	0	0	0	0	0	0	0	0	0	0	0	0	0	0	0	0	0	0	1.45401	0	0	0	0	1.4526	0.893612	0	0	0.544973	0	0	0	0	0	0	0	0	0	0
BIOTIN-BIOSYNTHESIS-PWY: biotin biosynthesis I|g__Haemophilus.s__Haemophilus_influenzae	0	0	0	0	0	7.01317	0	0	0	0	0	0	0	2.26573	0	2.85464	0	0	0	0	1.26913	0	0	0	0	0	0	0	0	0	0	0	2.83681	0	0	0	0	0	0.292616	0	0	0	0	0	0	0	0
BIOTIN-BIOSYNTHESIS-PWY: biotin biosynthesis I|g__Haemophilus.s__Haemophilus_parainfluenzae	0	3.83951	3.60521	8.49003	0	0	2.63985	0	0	0	2.98671	2.18122	0	3.67971	1.43665	0.781588	2.20003	2.2377	3.57798	3.25981	6.14224	1.89411	0	3.05797	0	0	5.35493	5.76794	0	0	5.54584	0	9.59163	35.664	2.35337	0	5.09039	12.2738	8.72599	3.46053	6.43254	0	0	0	0	0	0
BRANCHED-CHAIN-AA-SYN-PWY: superpathway of branched amino acid biosynthesis	393.15	518.897	447.262	337.856	358.269	428.133	301.955	345.737	276.753	423.599	252.638	619.726	308.217	517.978	347.19	357.323	337.547	398.852	395.606	370.732	553.899	408.476	566.433	368.632	401.543	263.594	534.684	574.223	622.667	600.902	539.643	419.914	509.21	703.21	250.105	462.011	449.683	481.877	489.28	563.794	546.097	415.525	318.185	320.652	378.477	430.377	368.208
BRANCHED-CHAIN-AA-SYN-PWY: superpathway of branched amino acid biosynthesis|g__Acidovorax.s__Acidovorax_ebreus	0	0	0	0	0	0	0	0	0	0	0	0	0	0	0	0	0	0	0	0	0	0	0	1.1477	0	0	0	0	0	0	0	0	0	0	0	0	0	0	0	0	0	0	0	0	0	0	0
BRANCHED-CHAIN-AA-SYN-PWY: superpathway of branched amino acid biosynthesis|g__Bifidobacterium.s__Bifidobacterium_longum	0	0	0	0	0	0	0	0	0	0	0	0	0	0	0	0	0	0	0	0	0	0	0	0	0	0	0	0	0	0	0	0	0	0	0.859522	0	0	0	0	0	0	0	0	0	0	0	0
BRANCHED-CHAIN-AA-SYN-PWY: superpathway of branched amino acid biosynthesis|g__Campylobacter.s__Campylobacter_gracilis	0	0	0	0	0	0	0	0	0	0	0	0	0	0	0	0	0	0	0	0.712914	0	0	0	0.956201	0	0	0	0	0	0	0	0	0	0	0	0	0	0	0	0.58785	0	0	0	0	0	0	0
BRANCHED-CHAIN-AA-SYN-PWY: superpathway of branched amino acid biosynthesis|g__Campylobacter.s__Campylobacter_rectus	0	0	0	0	0	0	0	0	0	0	0	0	0	0	0	0	0	0	0	0	0	0	2.01201	0	0	0	0	0	0	0	0	0	0	0	0	0	0	0	0	0	0	0	0	0	0	0	0
BRANCHED-CHAIN-AA-SYN-PWY: superpathway of branched amino acid biosynthesis|g__Campylobacter.s__Campylobacter_showae	0	7.69953	1.31537	0.918722	0	0	0	0	0	0	0	2.1206	0	0	0	0	0	0	3.21617	4.24555	0.959054	0	0	0.324099	0	0	0	0	0	0.614194	0.69473	0	2.15465	0.680446	0	0	0.696297	0	1.3618	0	0	0.943407	0	0	0	0	0
BRANCHED-CHAIN-AA-SYN-PWY: superpathway of branched amino acid biosynthesis|g__Cardiobacterium.s__Cardiobacterium_hominis	0	0	0	0	0	0	0	0	0	0	0	0	0	0	0	0	0	0	0	0	0	0	0.357634	0.406769	0	0	0	0	0	0	0.416018	0	0	0	0	0	0.111967	0	0	0	0.214174	0	0	0	0	0	0
BRANCHED-CHAIN-AA-SYN-PWY: superpathway of branched amino acid biosynthesis|g__Centipeda.s__Centipeda_periodontii	0	0	0	0	0	0	0	0	0	0	0	0	0	0	0	0	0	0	1.12307	0	0	0	0	0	0	0	0	0	0	0	0	0	0	0	0	0	0	0	0	0	0	0	0	0	0	0.606847	0
BRANCHED-CHAIN-AA-SYN-PWY: superpathway of branched amino acid biosynthesis|g__Corynebacterium.s__Corynebacterium_durum	0	0	0	0	0	0	0	0	0	0	0	0	0	0	0	0	0	0	0	0	0	0	0.958733	0.328343	0	0	2.08558	0	0	0	0	0	0	0	0	0	0	0	0	0	0	0	0	0	0	0	0
BRANCHED-CHAIN-AA-SYN-PWY: superpathway of branched amino acid biosynthesis|g__Corynebacterium.s__Corynebacterium_matruchotii	0	0	0	0	0	0	0	0	0	0	0	0	0	0	0	0	0	0	0	0	0	0	0	0.147951	0	0	0	0	1.79067	0	0.93953	0	0	0	0	0	0	0	0	0	0	3.24812	0	0	0	0	0
BRANCHED-CHAIN-AA-SYN-PWY: superpathway of branched amino acid biosynthesis|g__Enhydrobacter.s__Enhydrobacter_aerosaccus	0	0	0	0	0	0	0	0	0	0	0	0	0	0	0	0	0	0	0	0	0	0	0	0.115139	0	0	0	0	0	0	0	0	0	0	0	0	0	0	0	0	0	0	0	0	0	0	0
BRANCHED-CHAIN-AA-SYN-PWY: superpathway of branched amino acid biosynthesis|g__Escherichia.s__Escherichia_coli	0	0	0	0	0	0	0	0	0	0	0	0	0	0	0	0.812181	0	0	0	0	0	0	0	0.313471	0	0	0	0	0	0	0	0	0	0	0	0	0	0	0	0	0	0	0	0	0	0	29.2489
BRANCHED-CHAIN-AA-SYN-PWY: superpathway of branched amino acid biosynthesis|g__Fusobacterium.s__Fusobacterium_nucleatum	0	4.26848	0	0.970359	0	2.25187	0	1.71317	0	0	1.44317	5.64422	0	1.97639	0.718058	0.952467	3.93092	7.47391	10.3442	2.98684	2.83539	0	3.25623	3.98807	0	0	3.02881	2.96127	3.40492	0.60839	3.51795	0	1.82827	4.22976	0	0	2.35316	1.61232	3.88681	0.676317	1.83135	7.57298	0	1.48884	2.80779	0.904895	0
BRANCHED-CHAIN-AA-SYN-PWY: superpathway of branched amino acid biosynthesis|g__Fusobacterium.s__Fusobacterium_periodonticum	2.31876	37.3392	14.5598	3.54023	5.15927	3.0683	9.75718	13.6236	8.24647	6.08327	18.359	41.6404	2.24696	20.9246	0.394656	2.52825	15.2303	14.62	9.48433	11.3772	4.07467	14.6781	7.78176	10.1596	8.4005	7.82864	1.31791	20.926	64.7564	36.7106	14.1519	0	23.9817	5.53719	8.7663	3.25383	27.1011	49.1431	7.42502	7.78556	29.9271	13.8037	4.58253	16.1958	4.86775	3.52705	1.35243
BRANCHED-CHAIN-AA-SYN-PWY: superpathway of branched amino acid biosynthesis|g__Lachnoanaerobaculum.s__Lachnoanaerobaculum_saburreum	0	0	0	0	0	0	0	0	0	0	0	0.595475	0	0	0.350925	0	0	0	0	0	0	0	0	0	0	0	0	0	0	0	0	0	0	0	0	0	0	0	0	0	0	0	0	0	0	0	0
BRANCHED-CHAIN-AA-SYN-PWY: superpathway of branched amino acid biosynthesis|g__Lachnospiraceae_noname.s__Lachnospiraceae_bacterium_ICM7	0	3.43527	14.1544	0	0	0	1.56823	0	0	0	0.928422	3.19461	0	1.30887	0	0	0	1.29044	1.83533	0.993084	0	0	1.15359	0.37513	1.15715	0	0	0	3.28872	2.24008	0.594406	0	0.984373	2.44657	0	0	3.7164	1.09152	0.65015	2.11686	4.93243	1.31595	0	2.38895	0	0	0
BRANCHED-CHAIN-AA-SYN-PWY: superpathway of branched amino acid biosynthesis|g__Lachnospiraceae_noname.s__Lachnospiraceae_bacterium_oral_taxon_082	0	0	0	0	0	0	0	0	0	0	0	0.928963	0	0.901274	0	0	0	0	0	0	0.880739	0	1.41067	1.41533	0	0	0	0	0	2.22221	0	0.751479	1.28078	0	0	0	0	0	0.856312	0.75107	1.00905	0	0	0	0	0	0
BRANCHED-CHAIN-AA-SYN-PWY: superpathway of branched amino acid biosynthesis|g__Lachnospiraceae_noname.s__Lachnospiraceae_oral_taxon_107	0	0	0	0	0	0	0	0	0	0	0	0	0	0	0	0	0	0	0	0	0	0	0	0	0	0	0	0	0	0	0.398968	0	0	0	0	0	0	0	0	0.630478	0	0	0	0	0	0	0
BRANCHED-CHAIN-AA-SYN-PWY: superpathway of branched amino acid biosynthesis|g__Lautropia.s__Lautropia_mirabilis	0	0.729319	0	0	0	0	0	0.995933	0	0	0	5.01448	0	0.797872	0.52467	0.0868613	0	4.4329	0	0	3.00162	0	4.021	0.443703	0	0	0	4.80822	7.6234	2.86675	22.2595	5.30123	0	7.31716	0	0.821185	2.72741	11.1143	11.2696	9.12359	2.44686	0	0	0	0	0	0
BRANCHED-CHAIN-AA-SYN-PWY: superpathway of branched amino acid biosynthesis|g__Leptotrichia.s__Leptotrichia_buccalis	0	0	0	0	0	0	0	0	0	0	0	0	0	0	0	0	0	1.3364	0	0	0	0	0	0.444477	0	0	0	0	0	0	2.41689	0	0	0	0	0	0	0	0	0	0	2.38715	0	0	0	0	0
BRANCHED-CHAIN-AA-SYN-PWY: superpathway of branched amino acid biosynthesis|g__Leptotrichia.s__Leptotrichia_hofstadii	0	0	0	0	0	0	0	0	0	0	0	1.30417	0	0	1.63994	0	1.59288	0	2.2606	1.11408	0	0	0.716479	0.106757	0	0	2.83908	0	1.11043	0	0	0	0	0	0	0	0	0	0	2.21236	0	2.55288	0	0	0	0	0
BRANCHED-CHAIN-AA-SYN-PWY: superpathway of branched amino acid biosynthesis|g__Neisseria.s__Neisseria_elongata	0	0	0	0	0	0	0.609825	0	0	0	0	0	0	0	0	0	0	0.818632	0	1.10967	1.69541	0	0	0.877257	0	0	0	0	0	0	0	0	0	1.78662	0	0	0.494289	4.9098	1.45796	0.99425	0.472783	0	0	0	0	0	0
BRANCHED-CHAIN-AA-SYN-PWY: superpathway of branched amino acid biosynthesis|g__Neisseria.s__Neisseria_flavescens	0	0	0.999532	2.80148	2.83836	0	0	1.32478	0	0	2.24619	0	0	8.69009	0.72782	0	1.05837	2.39553	0	5.87229	0	0	1.88221	0.629505	0	5.47789	4.49172	29.3589	2.29393	2.91251	7.3345	0	1.71633	16.0505	0	0	4.45571	17.3585	1.91703	11.0632	3.71718	4.38398	0	2.73556	0.960028	0	1.44263
BRANCHED-CHAIN-AA-SYN-PWY: superpathway of branched amino acid biosynthesis|g__Neisseria.s__Neisseria_macacae	0	0	0	0	0	6.56442	0	0	0	0	0	5.29939	0	0	0	0	1.09378	2.15577	1.83582	1.70511	0.930005	0	1.31694	1.01911	0	0	2.08014	17.5084	0	0	6.71952	0	0	0	0	2.49939	2.94703	1.99042	0	6.0094	0	1.77971	0	0.756283	0	0	0
BRANCHED-CHAIN-AA-SYN-PWY: superpathway of branched amino acid biosynthesis|g__Neisseria.s__Neisseria_sicca	0	0	0	1.32437	0	10.0708	2.8732	0	0	1.37656	0	14.3258	2.61812	0	1.6294	0	0	7.2195	2.81222	5.44102	3.50729	4.24724	3.99117	2.82109	0	0.84192	19.4301	35.1892	0	0	9.89775	0	7.042	24.8255	1.42353	2.29903	5.29413	9.40313	1.51799	15.4727	5.74101	3.10649	0	2.24582	5.04244	0	0
BRANCHED-CHAIN-AA-SYN-PWY: superpathway of branched amino acid biosynthesis|g__Neisseria.s__Neisseria_sp_oral_taxon_014	0	0	0	0	0	0	0	0	0	0	0	0	0	0	0	0	0	0	0	0	0	0	0	0	0	0	0	0	0	0	0	0	0	0	0	0	0	0	0	0	3.51277	0	0	0	0	0	0
BRANCHED-CHAIN-AA-SYN-PWY: superpathway of branched amino acid biosynthesis|g__Oribacterium.s__Oribacterium_sinus	0	3.50263	3.63755	0	1.43331	6.65797	0	0	1.79736	1.01076	0	13.1575	0	12.0224	3.01208	2.55787	0	9.13313	3.10853	2.01081	2.95269	3.2071	2.86402	0.53231	1.7138	2.11128	0	4.78771	4.51111	9.64174	5.72782	0	6.1502	4.91215	1.48859	1.32156	6.64868	1.76319	13.3461	10.5667	5.51849	2.66319	10.5062	0.954369	0	5.45731	4.51476
BRANCHED-CHAIN-AA-SYN-PWY: superpathway of branched amino acid biosynthesis|g__Peptostreptococcaceae_noname.s__Eubacterium_yurii	0	0	0	0	0	0	0	0	0	0	0	0	0	0	0	0	0	0	0	0	0	0	0	0.0227771	0	0	0	0	0	0	0	0	0	0	0	0	0	0	0	0	0	0	0	0	0	0	0
BRANCHED-CHAIN-AA-SYN-PWY: superpathway of branched amino acid biosynthesis|g__Prevotella.s__Prevotella_buccae	0	0	0	0	0	0	0	0	0	0	0	0	0	0	0	0	0	0	0	0	0	0	0	0	0	0	0	0	0	0	0	0	0	0	0	0	0	0	0	0	0	0	0	0	0.974628	0	0
BRANCHED-CHAIN-AA-SYN-PWY: superpathway of branched amino acid biosynthesis|g__Propionibacterium.s__Propionibacterium_propionicum	0	0	0	0	0	0	0	0	0	0	0	0.949704	0	0	0	0	1.20606	0	0.631308	0	0	0	2.86809	1.38499	0	0	0	0	0	0	0	0	0	0	0	0	1.3962	0	0.250498	0	2.47016	0	0	0	0	0	0
BRANCHED-CHAIN-AA-SYN-PWY: superpathway of branched amino acid biosynthesis|g__Rothia.s__Rothia_aeria	0	0	0	0	0	0	0	0	0	0	0	4.86297	0	0	0	0.386419	0	1.59979	2.82425	0.841455	2.61363	0	2.51603	0.721453	0	0	14.9069	4.11422	2.65448	0.774673	2.55044	0	0	5.88806	0	0	3.29306	0	1.79541	2.8298	1.44203	0	0	0	0	0	0
BRANCHED-CHAIN-AA-SYN-PWY: superpathway of branched amino acid biosynthesis|g__Rothia.s__Rothia_dentocariosa	0	0	0	0	0	7.76969	0	0	0	0	1.67896	3.53024	0	0.799381	0.39853	0.880532	1.57667	0	0	0	1.72889	0	6.67311	0.0915149	1.41714	0	14.0925	0	0	1.26327	0	6.91767	4.18177	10.8991	0	1.8511	4.63597	0	7.98469	1.56658	0.937224	0	0	0	0	0	0.954783
BRANCHED-CHAIN-AA-SYN-PWY: superpathway of branched amino acid biosynthesis|g__Selenomonas.s__Selenomonas_flueggei	4.26001	0	11.1702	12.9327	5.68428	0	4.76457	0	3.10176	2.45225	8.52057	2.05249	10.6416	2.19669	1.90763	0	0.959869	0.934409	2.22833	17.5688	9.78222	12.0486	4.33487	2.72338	7.22916	0	0	0	0	0.971772	0	25.6191	72.4458	0	0	0	0	0	8.97988	7.71278	2.02797	3.09419	10.5521	0	2.78266	6.59463	0
BRANCHED-CHAIN-AA-SYN-PWY: superpathway of branched amino acid biosynthesis|g__Selenomonas.s__Selenomonas_sputigena	0	0	0	0	0	0	0	0	0	0	0	0	0	0	0	0	0	0	0	2.72858	0	0	1.37336	0	0	0	0	0	0	0	0	0	1.41869	0	0	0	0	0	0	0	0	0	0	0	0	0	0
BRANCHED-CHAIN-AA-SYN-PWY: superpathway of branched amino acid biosynthesis|g__Shuttleworthia.s__Shuttleworthia_satelles	0	1.16518	0	0	0	0	0	0	0	0	0	1.80576	0	0	0.458391	0	0	0	0	0	0	0	0	0	0	0	0	0	0	0.750247	0	0	0	0	0	0	0	0	0	0	0	0	0	0	0	1.38309	0
BRANCHED-CHAIN-AA-SYN-PWY: superpathway of branched amino acid biosynthesis|g__Streptococcus.s__Streptococcus_australis	0	17.1403	6.82356	0.859889	0	0	2.29823	0	0	0	1.18106	2.32993	0	2.40023	0	0	1.22716	1.28376	2.68092	2.19854	0	1.63342	1.16986	0.787313	1.08764	0	7.36498	5.69604	11.1313	4.19165	16.0584	0	1.57759	32.9089	2.09728	0	11.1161	17.3755	0.745678	3.73864	16.3068	5.13401	0	0	0	1.10176	0
BRANCHED-CHAIN-AA-SYN-PWY: superpathway of branched amino acid biosynthesis|g__Streptococcus.s__Streptococcus_cristatus	0	0	0.953528	0	0	0	1.76204	0	0	0	0	1.26527	0	0	0.553371	0	0	1.03908	2.6941	0	0	1.77293	2.8098	0	0	0	22.6278	1.06752	1.91547	0.682955	1.4877	0	0	0.702004	0.63209	0	0.243624	0.803821	0	3.08724	0.390926	5.5767	1.38116	0	0	1.45388	0
BRANCHED-CHAIN-AA-SYN-PWY: superpathway of branched amino acid biosynthesis|g__Streptococcus.s__Streptococcus_infantis	1.98091	32.1961	7.87014	7.89542	2.01268	9.36384	13.3884	4.21322	5.91827	2.84248	4.27963	23.0984	0	33.298	2.25663	5.87219	8.03657	4.37741	15.9551	4.83738	20.8177	4.60319	25.2771	3.21269	6.5313	1.43653	34.276	15.022	15.7589	9.20468	33.7484	0	4.60764	29.877	14.3212	0	15.3557	39.0091	4.25649	19.4475	24.8597	15.3009	8.8472	2.61476	5.14017	5.48346	4.08142
BRANCHED-CHAIN-AA-SYN-PWY: superpathway of branched amino acid biosynthesis|g__Streptococcus.s__Streptococcus_mitis_oralis_pneumoniae	10.6637	30.9446	16.5876	4.89092	7.71257	48.215	35.0119	30.1266	12.3605	40.5824	16.9179	74.3243	14.4412	25.3779	48.0911	30.9936	29.0397	29.9419	39.6084	26.5645	58.1987	21.6422	31.4397	5.22027	12.6779	8.69641	87.443	68.8544	21.3167	8.75029	80.1549	25.8045	34.8843	96.9861	17.9481	22.3241	39.0864	22.5196	37.2589	114.299	15.6133	50.9305	42.988	6.94008	23.5552	11.7785	6.77665
BRANCHED-CHAIN-AA-SYN-PWY: superpathway of branched amino acid biosynthesis|g__Streptococcus.s__Streptococcus_parasanguinis	29.7884	3.67076	0.730874	2.40515	4.86317	9.96477	6.52731	0	7.63878	7.83165	1.51862	16.8077	8.22614	21.1548	7.69158	10.6547	2.56727	1.5655	5.72438	2.62561	41.1389	3.64857	52.688	5.58796	7.88354	3.10441	20.5053	7.63379	22.0954	40.4907	3.74872	20.803	10.285	9.88039	0	21.7487	1.11561	12.8149	14.0009	13.2893	8.94432	21.0654	7.58963	1.85791	3.72178	11.9779	15.5344
BRANCHED-CHAIN-AA-SYN-PWY: superpathway of branched amino acid biosynthesis|g__Streptococcus.s__Streptococcus_peroris	0	0	0	0	0	0	0	0	0	0	0	0	0	0	0	0	0	0	0	0	0	0	0	0	0	0	0	0	0	0	0	0.671245	0	0	0	0	0	0	0	0	0	0	0	0	0	0	0
BRANCHED-CHAIN-AA-SYN-PWY: superpathway of branched amino acid biosynthesis|g__Streptococcus.s__Streptococcus_pseudopneumoniae	0	0	0	0	0	0	0	0	0	0	0	0	0	0	0	0	0	0	0	1.0112	0	0	0	0	0	0	0	0	0	0	0	1.8773	0	0	0	0	0.819133	0	0	0	0	0	0	0	0	0	0
BRANCHED-CHAIN-AA-SYN-PWY: superpathway of branched amino acid biosynthesis|g__Streptococcus.s__Streptococcus_sanguinis	2.53781	5.3811	29.8289	2.87045	0	45.5106	16.1935	7.99795	3.81706	9.4717	11.0951	30.2288	6.06384	3.9576	8.56294	11.0659	1.88584	25.3634	12.2714	6.36841	9.98185	9.6704	17.885	5.31221	1.27261	5.0812	26.2184	20.9853	9.24971	10.9024	25.9469	4.3721	16.5252	30.6706	2.78103	7.23105	23.0338	2.08095	7.78897	28.5814	11.3062	4.10192	17.4481	13.0327	19.7054	7.2953	4.4415
BRANCHED-CHAIN-AA-SYN-PWY: superpathway of branched amino acid biosynthesis|g__Streptococcus.s__Streptococcus_sp_M334	0	0	0	0	0	0	0	0	0	0	0	0	0	0	0	0	0	0	0	0	9.65346	0	0	0	0	0	0	0	0	0	0	0	5.20086	0	0	0	0	0	0	0	0	0	0	0	0	0	0
BRANCHED-CHAIN-AA-SYN-PWY: superpathway of branched amino acid biosynthesis|g__Streptococcus.s__Streptococcus_sp_SK140	0	0	0	0	0	0	0	0	0	0	0	0	0	7.70459	0	0	0	0	0	0	0	0	0	1.13854	0	0	0	0	0	0	0	0	0	0	0	0	3.97685	0	0	0	0	0	0	0	0	0	0
BRANCHED-CHAIN-AA-SYN-PWY: superpathway of branched amino acid biosynthesis|g__Streptococcus.s__Streptococcus_tigurinus	0	0	0	0	0	1.87291	1.0394	0	0	0	0	0	0	0	2.19814	0	0	0	0	0	0	0	0	0	0	0	0	0	0	0	0	0	0	0	0	0	0.433653	0	0	1.50454	0	0	0	0	0	0	0
BRANCHED-CHAIN-AA-SYN-PWY: superpathway of branched amino acid biosynthesis|g__Veillonella.s__Veillonella_sp_oral_taxon_780	0	0	0	0	0	0	0	0	0	5.9186	0	0	0	0	3.07355	0	0	0	4.11881	0	8.12933	0	0	0	0	0	0	0	0	0	0	0	0	0	0	0	6.93304	0	4.00998	0	0	0	0	0	10.0807	0	0
BRANCHED-CHAIN-AA-SYN-PWY: superpathway of branched amino acid biosynthesis|unclassified	8.00193	42.4926	25.0137	11.4615	0	0	8.65351	12.2823	0	6.1178	7.40496	36.8955	0	25.1587	11.7286	20.0756	18.3772	17.4969	11.2088	34.1284	21.6134	0	22.9749	20.4614	10.0516	24.5042	0	16.1798	12.2286	23.8857	16.039	18.0152	38.9224	28.1599	27.6952	7.3664	52.9917	19.4375	20.2342	17.3145	39.5145	32.0673	12.1788	13.1798	11.5106	9.66046	12.2182
CALVIN-PWY: Calvin-Benson-Bassham cycle	184.328	380.325	379.14	245.353	184.934	264.947	321.037	327.809	284.52	295.491	317.8	457.917	210.572	350.778	261.194	316.202	407.978	289.534	314.542	298.806	370.162	226.508	323.718	277.285	229.402	305.629	294.381	351.136	371.792	350.201	384.622	249.627	379.624	443.747	313.539	291.997	420.113	329.784	337.888	381.83	413.266	363.21	229.524	347.106	257.794	316.139	227.848
CALVIN-PWY: Calvin-Benson-Bassham cycle|g__Campylobacter.s__Campylobacter_gracilis	0	0	0	0	0	0	0	0	0	0	0	0	0	0	0.287821	0	0	0	0	0	0	0	0	0.34593	0	0	0	0	0	0	0	0	0	0	0	0	0	0	0.258854	0	0	0	0	0	0	0	0
CALVIN-PWY: Calvin-Benson-Bassham cycle|g__Campylobacter.s__Campylobacter_showae	0	7.11127	1.38928	0	0	0	0	0	0	0	0	2.08039	0	0	0	0	0	0	2.27622	2.43359	0	0	0	0.797727	0	0	0	0	0	0	0	0	0	0.567319	0	0	0.807581	0	0.535284	0	0.55893	1.1334	1.58367	0	0	0	0
CALVIN-PWY: Calvin-Benson-Bassham cycle|g__Enhydrobacter.s__Enhydrobacter_aerosaccus	0	0	0	0	0	0	0	0	0	0	0	0	0	0	0	0	0	0	0	0	0	0	0	0.0890505	0	0	0	0	0	0	0	0	0	0	0	0	0	0	0	0	0	0	0	0	0	0	0
CALVIN-PWY: Calvin-Benson-Bassham cycle|g__Fusobacterium.s__Fusobacterium_nucleatum	0	5.04671	0	0	0	0	0	1.87019	1.35897	0	3.04751	5.78637	2.37447	3.98031	1.54738	2.32827	2.7304	5.15665	7.85686	3.57628	1.70169	0	8.9719	6.77387	1.01138	1.95669	6.26847	0	2.59608	3.77742	11.3382	2.35035	3.80162	3.98187	0	2.43571	1.9427	7.02538	2.62368	4.29341	3.68345	6.72565	1.87897	5.53763	4.31926	1.76582	0
CALVIN-PWY: Calvin-Benson-Bassham cycle|g__Gemella.s__Gemella_haemolysans	0	0	0	1.01758	0	0	4.46279	2.41595	0	0	0	5.10334	0	0.803828	2.55219	0	2.68266	0.995968	2.90671	1.03552	5.80156	0	2.31062	0.0813889	0	0	1.71421	0	0.832382	0	1.71769	1.05033	3.55764	3.35039	1.20773	2.2826	2.48295	0	0.396253	2.46209	0.722011	1.30554	0	0	3.20342	0	0
CALVIN-PWY: Calvin-Benson-Bassham cycle|g__Lachnospiraceae_noname.s__Lachnospiraceae_bacterium_ICM7	0	3.22147	13.563	0	0	0	2.04701	0	0	0	0	1.83908	0	0	0	0	0	1.10102	0	0.670513	0	0	2.53011	0.350063	0	0	0	0	3.62	1.7216	0.581806	0	0	1.98366	0	0	3.83275	1.25964	1.10434	2.07702	4.5917	0	0	0	0	0	0
CALVIN-PWY: Calvin-Benson-Bassham cycle|g__Peptostreptococcus.s__Peptostreptococcus_stomatis	0	1.16351	11.3636	2.14279	0	0	7.28395	4.31531	2.43867	0	10.4081	0	0	0	0	4.62392	15.0818	2.12695	1.66503	2.50529	0	0	7.94419	5.48261	2.7286	5.9877	0	0	0	1.47212	0	0	1.31126	1.70044	5.48454	0	11.006	0	0	0	0	4.46872	0	10.4967	2.91147	0	0
CALVIN-PWY: Calvin-Benson-Bassham cycle|g__Porphyromonas.s__Porphyromonas_endodontalis	0	0	0	0	0	0	0	0	0	0	1.83335	0	0	1.97439	1.80105	0	0	1.31883	1.94228	0	0	0	0	0	0	2.2579	0	0	0	0	0	0	0	0	0	0	0	4.49283	0	0	0.654323	1.5021	0	0	1.10476	0	0
CALVIN-PWY: Calvin-Benson-Bassham cycle|g__Prevotella.s__Prevotella_marshii	0	0	0	0	0	0	0	0	0	0	0	0	0	0	0	0	0	0	0.799946	0	0	0	0	0	0	0	0	0	0	0	0	0	0	0	0	0	0	0	0	0	0	0	0	0	0	0	0
CALVIN-PWY: Calvin-Benson-Bassham cycle|g__Selenomonas.s__Selenomonas_sputigena	0	0	0	0	0	0	0	0	0	0	0	1.7605	0	0	0	0	0	0	0	4.7634	0	1.1617	2.6373	0	0	0	0	0	0	0	0	0	0	0	1.36355	0	0	0	0	0.786806	0	1.30469	1.63036	0	0	0.731105	0
CALVIN-PWY: Calvin-Benson-Bassham cycle|g__Treponema.s__Treponema_medium	0	0	0	0	0	0	0	0	0	0	0	0	0	0	0	0	0	0	0	0	0	0	0	0	0	0	0	0	0	0.469803	0	0	0	0	0	0	0	0	0	0	0	0	0	0	0	0	0
CALVIN-PWY: Calvin-Benson-Bassham cycle|unclassified	22.1742	72.722	67.2177	36.3539	14.9307	0	51.6427	56.089	0	22.4052	62.6894	53.026	22.4344	19.9961	26.9107	54.312	63.6757	20.172	31.202	73.3257	58.1407	27.2519	24.9309	43.4832	56.6528	93.5678	11.5903	11.3376	34.5901	34.8988	17.3708	10.3341	51.2858	27.6183	74.013	31.5369	105.334	0	32.5652	35.0598	57.8107	23.8587	13.6961	77.6857	21.8538	52.0034	13.1563
CATECHOL-ORTHO-CLEAVAGE-PWY: catechol degradation to &beta;-ketoadipate	0	0	0	0	0	0	0	0	0	0	0	0	0	0	0	0	0	0	0	0	0	0	0	0.592388	0	0	0	0	0	0	0	0	0	0	0	0	0	0	0	0	0	0	0	0	0	0	0
CATECHOL-ORTHO-CLEAVAGE-PWY: catechol degradation to &beta;-ketoadipate|g__Acidovorax.s__Acidovorax_ebreus	0	0	0	0	0	0	0	0	0	0	0	0	0	0	0	0	0	0	0	0	0	0	0	0.375885	0	0	0	0	0	0	0	0	0	0	0	0	0	0	0	0	0	0	0	0	0	0	0
CENTFERM-PWY: pyruvate fermentation to butanoate	0	0	0	0	0	0	0	0	0	0	0	0	0	0	0	0.956095	0	0	0	0	0	0	0	2.89981	0	0	0	0	0	0	0	0	0	0	0	0	0	0	0	0	0	0	0	0	0	0	0
CENTFERM-PWY: pyruvate fermentation to butanoate|unclassified	0	0	0	0	0	0	0	0	0	0	0	0	0	0	0	0	0	0	0	0	0	0	0	1.95076	0	0	0	0	0	0	0	0	0	0	0	0	0	0	0	0	0	0	0	0	0	0	0
CITRULBIO-PWY: L-citrulline biosynthesis	0	9.29609	6.12187	0	0	4.01718	6.78402	4.59539	0	0	8.57119	21.9402	5.9046	5.26925	2.81301	6.33887	5.98057	8.06128	9.99895	1.78555	6.89716	0	17.8832	5.83836	0	6.31003	3.98759	17.1253	23.5303	4.50151	51.2108	5.69724	10.1396	21.811	0	0	3.85559	32.4399	25.4121	20.9855	6.93857	6.24588	0	2.2051	6.92725	3.28016	0
COA-PWY-1: coenzyme A biosynthesis II (mammalian)	522.285	580.426	616.776	551.411	518.721	494.306	461.681	689.187	681.209	621.227	495.582	628.42	378.414	591.079	462.818	508.324	609.162	437.799	473.081	421.274	579.173	461.976	577.645	638.464	635.494	590.581	556.101	559.588	626.217	671.202	570.865	552.548	536.867	628.361	473.459	582.019	436.877	529.428	526.859	542.248	629.341	551.52	422.057	535.403	461.518	628.36	469.851
COA-PWY-1: coenzyme A biosynthesis II (mammalian)|g__Abiotrophia.s__Abiotrophia_defectiva	2.24596	0	0	0	0	5.4999	0	1.35581	0	0	0	2.7363	0	0	2.96328	0.919566	4.42992	3.74583	2.46725	1.89972	1.98852	0	1.27891	3.07912	0	0	7.78725	4.05214	0	0	1.40261	0	0	3.98796	0	0	5.56293	0	0	1.17238	1.52658	5.94908	0	1.48589	4.61758	4.13453	0
COA-PWY-1: coenzyme A biosynthesis II (mammalian)|g__Acidovorax.s__Acidovorax_ebreus	0	0	0	0	0	0	0	0	0	0	0	0	0	0	0	0	0	0	0	0	0	0	0	0.911504	0	0	0	0	0	0	0	0	0	0	0	0	0	0	0	0	0	0	0	0	0	0	0
COA-PWY-1: coenzyme A biosynthesis II (mammalian)|g__Actinobaculum.s__Actinobaculum_sp_oral_taxon_183	0	0	0	0	0	0	0	0	0	0	0	0	0	0	0	0	0	0	0	0	0	0	0	0.580931	0	0	0	0	0	0	0	0	0	0	0	0	0	0	0	0	0	0	0	0	0	0	0
COA-PWY-1: coenzyme A biosynthesis II (mammalian)|g__Actinomyces.s__Actinomyces_graevenitzii	0	0	3.60967	0	0	0	0	0	0	0	0	0	0	0	0	0	1.72644	0	0	0	0	0	0	0.406555	0	0	0	0	0	0	0	0	0	0	0	0	0	4.71566	1.61404	0	0	1.00628	0	0	0	0	0
COA-PWY-1: coenzyme A biosynthesis II (mammalian)|g__Actinomyces.s__Actinomyces_johnsonii	0	0	0	0	0	0	0	0	0	0	0	0	0	0	0	0	0	0	0	0	0	0	0	0.274322	0	0	0	0	0	0	0	0	0	0	0	0	0	0	0	0	0	0	0	0	0	0	0
COA-PWY-1: coenzyme A biosynthesis II (mammalian)|g__Actinomyces.s__Actinomyces_massiliensis	0	0	0	0	0	0	0	0	0	0	0	0	0	0	0	0	0	0	0	0	0	0	0	0.338941	0	0	0	0	1.20538	0.798764	0.635261	0	0	0	0	0	0	0	0	0	0	1.30321	0	0	0	0	0
COA-PWY-1: coenzyme A biosynthesis II (mammalian)|g__Actinomyces.s__Actinomyces_naeslundii	0	0.563601	0	1.47047	0	0	0	0	0	0	0	1.65301	0	0	0	0	1.44951	0	0	0	0	0	0.921734	0.90711	0	0	0	0	0	0	0	0	0	0	0	0.663784	0.15288	0	0	0	0.554433	0	0	0	0	0.765092	0
COA-PWY-1: coenzyme A biosynthesis II (mammalian)|g__Actinomyces.s__Actinomyces_odontolyticus	0	0	2.66304	0	4.13688	1.87593	3.223	1.81337	0	2.60012	0.930292	3.46669	3.01111	3.35608	0.755092	3.52272	0.779327	2.73258	0	0	2.75279	0	0	0.740027	6.61441	0	0	0	6.07953	7.1829	3.13231	0	0	2.65588	2.13077	1.4959	1.67477	4.59688	1.18668	2.80947	4.06079	2.43412	0	2.94882	0	2.4526	5.87051
COA-PWY-1: coenzyme A biosynthesis II (mammalian)|g__Actinomyces.s__Actinomyces_sp_HPA0247	0	0	0	0	0	0	0	0	0	0	0	0	0	0	0.968031	31.8625	0	0	0	0	0	0	0	0.296552	0	0	0	0	0	0	0	0	0	0	0	0	0	0	5.10933	9.21165	0	0	0	0	0	0	0
COA-PWY-1: coenzyme A biosynthesis II (mammalian)|g__Actinomyces.s__Actinomyces_sp_ICM39	0	4.98209	0	0	0	0	0	0	0	0	0	0	0	0	0	0	0	0	0	0	0	0	0	2.31664	0	0	0	0	0	0	0	0	0	0	0	0	0	0	0	0	0	0	0	0	0	0	0
COA-PWY-1: coenzyme A biosynthesis II (mammalian)|g__Actinomyces.s__Actinomyces_sp_ICM47	0	0	0	0	0	0	0	0	0	0	0	0	0	0	5.26506	0	0	0	0	0	0	0	0	12.1913	0	0	0	0	0	0	0	0	0	0	0	0	0	0	2.64138	0	0	0	0	0	0	0	0
COA-PWY-1: coenzyme A biosynthesis II (mammalian)|g__Actinomyces.s__Actinomyces_sp_oral_taxon_172	0	0	0	0	0	0	0	0	0	0	0	0	0	0	0	0	0	0	0	0	0	0	0	5.50175	0	0	0	0	0	0	0	0	0	0	0	0	0	0	0	0	0	0	0	0	0	0	0
COA-PWY-1: coenzyme A biosynthesis II (mammalian)|g__Actinomyces.s__Actinomyces_sp_oral_taxon_448	0	0	0	0	0	0	0	0	0	0	0	0	0	0	2.6132	0	0	0	0	0	0	0	0	0.111181	0	0	0	0	0	0	0	0	0	0	0	0	0	0	0	0	0	0	0	0	0	0	0
COA-PWY-1: coenzyme A biosynthesis II (mammalian)|g__Aggregatibacter.s__Aggregatibacter_segnis	0	0	0	0	0	0	1.10385	0	0	0	2.76887	1.15678	0	0	0	0	0	0	2.86231	2.5456	0	0	0	0	0	0	0	0	0.644358	0	0	0	0	1.79492	0	0	0	0	0	0	0	3.31793	0	0	0	0	0
COA-PWY-1: coenzyme A biosynthesis II (mammalian)|g__Alloprevotella.s__Alloprevotella_rava	0	0	0	0	0	0	0	3.30847	0	0	0	0	0	0	0	0	0	0	0	0	0	0	0	0	0	1.82189	0	0	0	0	0	0	0	0	0	0	0	0	2.38248	1.01135	0	0	0	0	0	0	0
COA-PWY-1: coenzyme A biosynthesis II (mammalian)|g__Alloprevotella.s__Alloprevotella_tannerae	0	1.96966	6.16372	0	0	0	17.2585	3.81491	0	0	7.43397	5.5668	8.78139	2.45247	1.40972	0.928041	1.25765	3.81932	5.25248	0	0	9.56494	0	0	0	63.8744	0	0	0	0.896383	0	0	1.60813	1.51014	11.3891	3.13128	0.24362	1.5862	0	0	3.92993	3.83694	0	5.93838	2.68843	0	0
COA-PWY-1: coenzyme A biosynthesis II (mammalian)|g__Atopobium.s__Atopobium_parvulum	5.75921	5.46071	4.72645	7.50356	7.91716	0	4.39542	4.64877	6.01323	5.60875	0	9.41587	6.71209	1.26452	6.75248	10.1028	6.10855	7.08374	2.91927	2.56759	4.51063	6.90948	2.16628	11.6503	3.85898	0	7.52951	1.40515	0	4.23674	0	3.71653	5.03199	1.39387	2.27515	21.9214	0	0	4.22541	5.48164	0.624251	3.14334	3.32503	8.43034	9.87659	6.58616	11.2964
COA-PWY-1: coenzyme A biosynthesis II (mammalian)|g__Atopobium.s__Atopobium_rimae	0	3.45317	2.66589	0	0	0	0	0	0	0	1.37668	0	5.00324	0	3.99071	0	0	0	0	0	0	1.06386	0	4.42748	0	0	0	0	0	4.35284	0	0	0	0	0	4.41886	0	2.46216	0	0	0	0	0	6.37897	4.55177	3.33893	0
COA-PWY-1: coenzyme A biosynthesis II (mammalian)|g__Atopobium.s__Atopobium_sp_ICM58	0	0	0	0	0	0	0	0	0	0	0	0	0	0	0	0	0	0	0	0	0	0	3.15618	0	0	0	0	0	0	0	0	0	0	0	0	0	0	0	0	0	0	0	0	0	0	0	0
COA-PWY-1: coenzyme A biosynthesis II (mammalian)|g__Bacteroidetes_noname.s__Bacteroidetes_oral_taxon_274	0	0	0	0	0	0	0	0	0	0	0	0	0	0	0	0	0	0	0	0	0	0	0	0.221668	0	0	0	0	1.10735	0	1.73917	0	0	0	0	0	0	3.81253	0	0	0	0	0	0	0	0	0
COA-PWY-1: coenzyme A biosynthesis II (mammalian)|g__Campylobacter.s__Campylobacter_concisus	0	2.61966	0	0	0	0	0	0	0	0	0	4.2474	11.9228	0	2.95307	0	0	3.726	1.59795	6.65118	3.23329	1.49563	0	3.21697	3.20251	0	2.74515	0	0	1.26534	2.53835	12.1997	14.2903	0.752248	2.70509	0	1.17983	5.65655	8.46469	10.4703	1.82597	0	9.01539	2.66827	0	0	0
COA-PWY-1: coenzyme A biosynthesis II (mammalian)|g__Campylobacter.s__Campylobacter_gracilis	0	0	0	0	0	0	0	0	0	0	0	0	0	0	0	0	0	0	0	0	0	0	0	0.068704	0	0	0	0	0	0	0	0	0	0	0	0	0	0	0	0	0	0	0	0	0	0	0
COA-PWY-1: coenzyme A biosynthesis II (mammalian)|g__Campylobacter.s__Campylobacter_showae	0	1.97825	0	0	0	0	0	0	0	0	0	0	0	0	0	0	0	0	0	2.70981	0	0	0	0	0	0	0	0	0	0	0	0	0	0	0	0	0	0	0	0	0	0	0	0	0	0	0
COA-PWY-1: coenzyme A biosynthesis II (mammalian)|g__Capnocytophaga.s__Capnocytophaga_gingivalis	0	0	0	0	0	0	0	0	0	0	0	0	0	0	0	0	0	2.29297	0	0	0	0	0	0.945765	0	0	0	0	1.19836	0	0	0	1.29883	1.35922	0	0	0	0	0.58608	0	0	0	0	0	0	0	0
COA-PWY-1: coenzyme A biosynthesis II (mammalian)|g__Capnocytophaga.s__Capnocytophaga_granulosa	0	0	0	0	0	0	0	0	0	0	0	0	0	1.12134	0	0	0	0	0	0	0	0	0	0	0	0	0	0	0	0	0.775713	0	0	0	0	0	0	0	0.511828	0	0	0	0	0	0	0	0
COA-PWY-1: coenzyme A biosynthesis II (mammalian)|g__Capnocytophaga.s__Capnocytophaga_ochracea	0	0	0	0	0	0	0	0	0	0	0	0	0	0	0	0	3.11547	0	0	1.36762	1.47928	0	0	1.5163	0	1.59861	0	0	0	0.677947	0.978811	2.12083	0	0	0	0	0	1.9924	0.474688	0	0.438923	0	0	0	0	0	0
COA-PWY-1: coenzyme A biosynthesis II (mammalian)|g__Cardiobacterium.s__Cardiobacterium_hominis	0	0	0	0	0	0	0	0	0	0	0	0	0	0	0	0	0	0	0	0	0.493068	0	0.471388	0.399937	0	0	0	0	0	0.723498	0.667413	0	0	0.306033	0	0	0	0	0	0	0	0	0	0	0	0	0
COA-PWY-1: coenzyme A biosynthesis II (mammalian)|g__Catonella.s__Catonella_morbi	0	0	0	0	0	0	0	0	0	0	0	0	0	0	0	0	0	0	0	0	0	0	0	0.149306	0	0	0	0	0	0	0	0	0	0	0	0	0	0	0	0	1.31187	0	0	0	0	0	0
COA-PWY-1: coenzyme A biosynthesis II (mammalian)|g__Clostridiales_Family_XIII_Incertae_Sedis_noname.s__Eubacterium_infirmum	0	0.767573	1.0218	2.5067	0	0	0	0	3.31781	0	4.21354	5.21369	4.17645	0	1.34717	0.698883	4.16048	3.76247	0	0	0	2.45462	1.80047	1.85109	2.16008	0	0	0	0	0.709057	0	0	0	0.326147	1.09636	4.20279	0.177892	0	0	0	0	4.53984	0	5.26089	4.0751	7.56319	0
COA-PWY-1: coenzyme A biosynthesis II (mammalian)|g__Corynebacterium.s__Corynebacterium_durum	0	0	0	0	0	0	0	0	0	0	0	0	0	0	0	0	0	0	0	0	0	0	0	0	0	0	2.05184	0	0	0	0	0	0	0	0	0	0	0	0	0	0	0	0	0	0	0	0
COA-PWY-1: coenzyme A biosynthesis II (mammalian)|g__Corynebacterium.s__Corynebacterium_matruchotii	0	0	0	0	0	0	0	0	0	0	0	0	0	0	0	0	0	0	0	0	0	0	0	0	0	0	0	0	0	0	0	0	0	0	0	0	0	0	0	0	0	3.26228	0	0	0	0	0
COA-PWY-1: coenzyme A biosynthesis II (mammalian)|g__Cryptobacterium.s__Cryptobacterium_curtum	0	0	0	0	0	0	0	0	0	0	0	0	0	0	0.433962	0	0	0	0	0	0	0	0	0	0	0	0	0	0	0	0	0	0	0	0	0	0	0	0	0	0	0	0	0	0	0	0
COA-PWY-1: coenzyme A biosynthesis II (mammalian)|g__Dialister.s__Dialister_invisus	1.49891	0.933548	0	1.74535	0	0	2.85135	0	0	0	1.30834	0	6.35919	0	4.47843	0	0	1.35195	1.33907	0	0	0	0	3.41928	0	3.17296	0	0	0	0	1.51187	0	13.2789	0	1.22787	2.5407	0	0	0	0.980482	0.35332	0	2.07796	6.81546	14.6611	2.22576	0
COA-PWY-1: coenzyme A biosynthesis II (mammalian)|g__Eikenella.s__Eikenella_corrodens	0	0	0	0	0	0	0	0	0	0	0	1.3292	0	0	0	0	0	0	0	0	0	0	0	0.183937	0	0	0	0	0	0	0	0	0	0	0	0	0	0	0	0	0	0	0	0	0	0	0
COA-PWY-1: coenzyme A biosynthesis II (mammalian)|g__Escherichia.s__Escherichia_coli	1.22715	0	0	0	0	0	0	0	0	0	0	0	0	0	0	0.264429	0	0	0	0	0	0	0	0.235004	0	0	0	0	0	0	0	0	0	0	0	0	0	0	0	0	0	0	0	0	0	0	43.2514
COA-PWY-1: coenzyme A biosynthesis II (mammalian)|g__Eubacterium.s__Eubacterium_brachy	0	0	0	0	0	0	0	0	0	0	2.85071	2.0347	0	0	3.37199	0	0	0	1.03338	0	0	1.14453	1.93187	4.32265	0	4.83437	0	0	1.26483	1.58172	2.90205	3.3928	0	0	0	0	0	0	0	0	0	4.3843	0	2.16035	4.37154	0	0
COA-PWY-1: coenzyme A biosynthesis II (mammalian)|g__Fusobacterium.s__Fusobacterium_necrophorum	0	0	0	0	0	0	0	0	0	0	0	0	0	0	0	0	0	0	0	0	0	0	0	0	0	0	0	0	0	0	0	4.78946	0	0	0	0	0	0	0	0	0	0	0	0	0	0	0
COA-PWY-1: coenzyme A biosynthesis II (mammalian)|g__Fusobacterium.s__Fusobacterium_nucleatum	0	4.49686	1.73799	0	0	3.98697	0.896144	1.55348	2.23163	0	4.96659	4.84451	2.99827	5.65789	1.5278	2.71977	4.46916	8.54286	8.05722	3.82224	4	1.79179	8.17625	9.11574	0	4.44505	11.1414	2.6396	3.16348	2.64523	9.34401	5.28647	0	3.03745	0	2.72878	2.50828	4.33493	2.34753	1.38804	4.83962	8.19618	0	7.14403	1.79205	1.37636	0
COA-PWY-1: coenzyme A biosynthesis II (mammalian)|g__Fusobacterium.s__Fusobacterium_periodonticum	1.6455	7.50071	3.0532	0	1.83288	0	2.51306	3.42204	7.12486	0	11.5773	10.0499	0	12.3504	0	0.104079	0	5.52577	2.65122	4.75915	0	3.93242	2.13062	4.72004	7.52899	4.69898	0	7.16045	1.49791	7.74681	1.01215	0	6.46576	0.983201	2.99518	0	5.57419	22.4974	1.54923	0.894681	12.6937	2.05929	0	0	1.70976	0	1.65552
COA-PWY-1: coenzyme A biosynthesis II (mammalian)|g__Gemella.s__Gemella_haemolysans	0	1.42989	0	0	0	0	0	0	0	0	0	1.85687	0	1.33473	2.82084	0	0	0	1.18782	0	0	0	1.88165	0.0305117	1.5712	0	0	0	0	0	0	1.3981	2.65517	0.90649	0	0	1.87595	0	0	0	0	0	0	0	1.77597	0	0
COA-PWY-1: coenzyme A biosynthesis II (mammalian)|g__Gemella.s__Gemella_sanguinis	0	2.95393	1.93398	0	0	0	0	0	0	0	0	0	0	3.74192	0	0	0	0	1.06389	0	0	0	0	1.43285	0	0	9.99968	0	5.44455	0	1.07671	0	0	1.45221	0	0	1.19822	0	0	0	0.597424	0	0	0	0	0	0
COA-PWY-1: coenzyme A biosynthesis II (mammalian)|g__Granulicatella.s__Granulicatella_adiacens	0	2.0556	3.04889	1.65222	0	3.79556	5.33953	0	0	5.43377	0	3.10221	0	0	5.08408	6.35309	4.00163	6.26926	4.13402	1.76437	1.29291	5.10817	2.16073	1.7861	2.8579	1.63235	11.7363	5.26444	6.04293	4.41511	1.45395	0	1.81344	2.81066	0	2.91562	0.503262	6.05704	0.504824	8.67339	0.259871	2.1414	3.4659	0	2.29007	0	0
COA-PWY-1: coenzyme A biosynthesis II (mammalian)|g__Haemophilus.s__Haemophilus_haemolyticus	0	0	0	0	0	0	0	0	0	1.17272	0	0	0	0	0.247681	0	0	0	0	1.31824	0	0	0	0	0	0	0	0	0	0	0	0	2.27558	0.467393	0	0	0.425704	0	0	0	0	0	0	0	0	0	0
COA-PWY-1: coenzyme A biosynthesis II (mammalian)|g__Haemophilus.s__Haemophilus_influenzae	0	0	0	0	0	10.8906	0	0	0	0	0	0	0	0	0.244542	5.86894	0	0	0.968672	0	1.10537	0	0.768689	0	0.845511	0	0	0	0	0.386653	1.98362	0.847836	5.42177	0.519778	0	0	1.18268	0	0	0	0	0	0	0	0	0	0
COA-PWY-1: coenzyme A biosynthesis II (mammalian)|g__Haemophilus.s__Haemophilus_parahaemolyticus	0	0	0	0	0	0	0	0	0	0	0	0	0	0	0	0	0	0	0	0	0	0	0	0	0	0	0	0	0	0	1.82819	0	0	1.82871	0	0	0	0	0	0	0	0	0	0	0	0	0
COA-PWY-1: coenzyme A biosynthesis II (mammalian)|g__Haemophilus.s__Haemophilus_parainfluenzae	0	17.4913	43.5302	22.094	7.00209	26.9651	12.1945	13.8434	19.0434	5.36981	8.41968	9.35028	0	56.002	16.2887	6.5709	7.06255	18.6651	15.6763	21.4646	13.8094	7.87109	14.5143	15.6998	12.206	8.34329	11.29	52.4933	89.8386	95.4209	80.8919	1.90046	18.3021	92.8858	13.5286	5.39087	38.7729	47.6418	40.5782	15.1554	64.0553	11.6313	0	13.398	12.5075	2.26981	16.4868
COA-PWY-1: coenzyme A biosynthesis II (mammalian)|g__Haemophilus.s__Haemophilus_paraphrohaemolyticus	0	0	0	0	0	0	0	0	0	0	0	0	0	0	0	0	0	0	0	0	4.03155	0	0	0	0	0	0	0	0	0	0	0	2.01055	0	0	0	1.16694	0	0	0	0	0	0	0	0	0	0
COA-PWY-1: coenzyme A biosynthesis II (mammalian)|g__Haemophilus.s__Haemophilus_sputorum	0	0	0	0	1.08468	0	1.79249	1.06195	0	0	0	2.11777	0	0.86644	0	0	0.968492	0	0	1.05629	0	0	0	0.304741	0	0	0	2.50824	0	1.98748	4.05286	0	0	0	0	0	1.3333	1.2125	1.4689	0	0	1.45373	0	0	1.63806	0	0.858173
COA-PWY-1: coenzyme A biosynthesis II (mammalian)|g__Johnsonella.s__Johnsonella_ignava	0	0	0	0	0	0	0	0	0	0	0	0	0	0	0	0	0	0	0	0	0	0	0	0.0640569	0	0	0	0	0	0	0	0	0	0	0	0	0	0	0	0	0	0	0	0	0	0	0
COA-PWY-1: coenzyme A biosynthesis II (mammalian)|g__Kingella.s__Kingella_denitrificans	0	0	0	0	0	0	0	0	0	0	0	0	0	0	0	0	0	0	0	1.26972	1.73357	0	0.475108	0	0	0	0	0	0	0	0	0	0	0	0	0.472012	0	0	0	1.0014	0	0	0	0	0	0	0
COA-PWY-1: coenzyme A biosynthesis II (mammalian)|g__Lachnospiraceae_noname.s__Lachnospiraceae_bacterium_ICM7	0	1.79457	9.85638	0	0	0	2.14858	0	0	0	0	0	0	1.57283	0	0	0	2.21457	0.824983	1.45961	0	0	0.841619	0.474697	1.38597	0.913333	0	0	8.80654	2.61186	0	0	0	1.95591	0	0	2.55594	2.0565	1.16017	1.2452	3.10863	0	0	2.37325	0	0	0
COA-PWY-1: coenzyme A biosynthesis II (mammalian)|g__Lautropia.s__Lautropia_mirabilis	0	1.29831	0	0	0	0	0	0	0	0	0	5.75771	0	0	0.473559	0.0850729	0	3.56899	0.801198	0.577394	3.09289	0	1.45566	0.516194	0	0	0	9.95043	8.39273	2.1167	17.6986	6.1108	2.38571	8.72145	0	0	2.01596	9.38046	10.2526	8.95181	2.71605	0	0	0	0.860907	0	0
COA-PWY-1: coenzyme A biosynthesis II (mammalian)|g__Leptotrichia.s__Leptotrichia_buccalis	0	0	0	0	0	0	0	0	0	0	0	0	0	0	0	0	0	0	0	0	0	0	0	0.368899	0	0	0	0	0	0	0	0	1.48149	0	0	0	0	0	0	0	0	1.78725	0	0	0	0	0
COA-PWY-1: coenzyme A biosynthesis II (mammalian)|g__Leptotrichia.s__Leptotrichia_goodfellowii	0	0	0	0	0	0	0	0	0	0	0	0	0	0	0	0	0	0	0	0	0	0	0	0.731065	0	0	0	0	0	0	0	0	0	0	0	0	0	0	0	0	0	0	0	0	0	0	0
COA-PWY-1: coenzyme A biosynthesis II (mammalian)|g__Leptotrichia.s__Leptotrichia_hofstadii	0	0	0	0	0	0	0	0	0	0	0	0	0	0	0	0	0	0	0	0	0	0	0	0	0	0	0	0	0	0	0	0	0	0	0	0	0	0	0	0	0	1.71021	0	0	0	0	0
COA-PWY-1: coenzyme A biosynthesis II (mammalian)|g__Leptotrichia.s__Leptotrichia_sp_oral_taxon_215	0	0	0	0	0	0	0	0	0	0	0	0	0	0	0	0	0	0	0	0	0	0	0	0.29379	0	0	0	0	0	0	0	0	0	0	0	0	2.93425	0	0	0	0	0	0	0	0	0	0
COA-PWY-1: coenzyme A biosynthesis II (mammalian)|g__Leptotrichia.s__Leptotrichia_wadei	0	0	0	0.905554	0	0	0	1.29524	0	0	0	0	2.1434	0	0	0	0	0	0	0	0	0	0	0.191236	1.87058	0	1.0334	0	0	0	0	0	2.19041	0	0	0	0	0	0	0.990715	0	0	0	0	0	0	0
COA-PWY-1: coenzyme A biosynthesis II (mammalian)|g__Megasphaera.s__Megasphaera_micronuciformis	11.7772	0	0	2.64911	19.3338	0	0	5.14806	3.98436	3.40128	0	7.28318	6.49382	11.2643	8.60548	7.34842	0	2.58875	3.35465	5.72551	6.53382	2.1012	6.11873	12.7639	6.9201	0.797365	0	0	1.10735	10.0236	0	14.3426	14.9132	0	5.50511	13.454	0	0	9.66323	7.00733	5.25264	2.86869	27.3122	1.92563	5.17315	7.70229	5.64166
COA-PWY-1: coenzyme A biosynthesis II (mammalian)|g__Neisseria.s__Neisseria_bacilliformis	0	0	0	0	0	0	0	0	0	0	0	0	0	0	0	0	0	0	0	0	0	0	0	0	0	0	0	0	0	0	0	0	0	0	0	0	0	0	0.348577	0	0	0	0	0	0	0	0
COA-PWY-1: coenzyme A biosynthesis II (mammalian)|g__Neisseria.s__Neisseria_cinerea	0	0	0	0	0	0	0	0	0	0	0	0	0	0	0	0	0	0	0	0	0.818268	0	0	0	0	0	0	0	0	0	0	0	0	0	0	0	0	0	0	0	0	0	0	0	0.538519	0	0
COA-PWY-1: coenzyme A biosynthesis II (mammalian)|g__Neisseria.s__Neisseria_flavescens	0	0	0	1.22402	4.94147	0	0	4.04561	2.29441	0	0	0	0	2.24162	0	0	0	0	0	0	0	0	1.9932	1.47388	0	6.82574	2.39861	24.707	2.07954	3.00604	9.31214	0	1.61094	6.78989	0	0	3.93442	13.0031	0.800534	7.02881	2.39704	5.183	0	0	0	0	1.56883
COA-PWY-1: coenzyme A biosynthesis II (mammalian)|g__Neisseria.s__Neisseria_macacae	0	0	0	0	0	7.06946	0	0	0	0	0.628449	3.55361	0	0.796161	0	0	0	4.23921	3.47902	1.97264	0	0	2.1704	0.516717	0	0	7.32288	4.04167	0	0	10.5464	0	0	0	0	3.94665	3.68673	5.18707	0	3.74475	0	6.02123	0	4.7498	0	0	0
COA-PWY-1: coenzyme A biosynthesis II (mammalian)|g__Neisseria.s__Neisseria_meningitidis	0	0	0	0	0	0	0	0	0	0	0	0	0	0	0	0	0	0	0	0	0	0	0	0	0	0	0	0	0	0	0	0	0	0	0	0	0	0	0	0.319368	0	0	0	0	0	0	0
COA-PWY-1: coenzyme A biosynthesis II (mammalian)|g__Neisseria.s__Neisseria_sicca	1.68926	0	0	2.02269	0	10.1789	1.30664	1.02897	0	0	0	14.3592	2.3282	0	0.660488	0	0	4.35973	4.47056	4.71367	2.31531	0	2.41083	1.67254	0	0	17.5941	42.3561	0	0	8.5324	1.46098	8.3427	23.0269	0.671888	2.30663	4.23547	8.07713	0.762618	20.0361	4.51058	2.93376	2.84319	0	2.20136	0	0
COA-PWY-1: coenzyme A biosynthesis II (mammalian)|g__Neisseria.s__Neisseria_sp_oral_taxon_014	0	0	0	0	0	0	0	0	0	0	0	0	0	0	0	0	0	0	0	0	0	0	0	0	0	0	0	0	0	0	0	0	0	0	0	0	0	0	0	0	2.91808	0	0	0	0	0	0
COA-PWY-1: coenzyme A biosynthesis II (mammalian)|g__Neisseria.s__Neisseria_subflava	0	10.5308	0	0	0	0	0	0	0	0	2.12083	1.9494	0	11.6116	0	0	1.10991	0	2.98121	5.5578	0	0	0	1.4741	0	0	0	28.8804	3.32149	8.4089	15.5331	0	2.12277	11.419	2.25581	0	0	63.2785	5.3037	0	11.9656	0	0	2.60055	0	0	0
COA-PWY-1: coenzyme A biosynthesis II (mammalian)|g__Oribacterium.s__Oribacterium_sinus	0	0	0	0	1.4498	0	0	0	0	0	1.95723	6.35422	0	9.77052	3.4567	2.83026	0	1.62058	1.8087	1.3704	1.33896	0	2.82684	0.261653	0	0	0	0	2.07026	6.98412	5.16677	0	5.18503	4.54362	0	2.16056	2.66032	0	8.69618	7.55631	1.19237	0	4.47386	0	0	1.82122	0
COA-PWY-1: coenzyme A biosynthesis II (mammalian)|g__Oribacterium.s__Oribacterium_sp_ACB1	0	0	13.9131	0	0	0	0	0	0	0	0	0	0	0	0	1.6691	0	0	0	0	0	0	0	0	0	0	0	0	0	0	0	0	0	0	0	0	6.05388	0	0	0	0	0	0	0	0	0	0
COA-PWY-1: coenzyme A biosynthesis II (mammalian)|g__Oribacterium.s__Oribacterium_sp_ACB8	0	0	0	0	0	0	0	0	0	11.4636	0	0	0	0	0	0	0	0	0	0	0	0	0	0	0	0	0	0	0	0	0	0	0	0	0	0	0	0	0	0	0	0	0	0	0	0	0
COA-PWY-1: coenzyme A biosynthesis II (mammalian)|g__Parvimonas.s__Parvimonas_micra	0	2.44522	5.5759	0	0	0	0.756028	0	8.00751	1.07637	13.1906	0	1.09192	4.75204	6.60194	0	0	0	1.62672	0	0	0	6.32398	0.55549	0.574796	3.16546	0	1.03205	0	0.330024	0	0	0	0.912325	3.25811	2.45047	1.98698	0	0	0	1.02556	5.98779	0	1.92043	3.21994	0	0
COA-PWY-1: coenzyme A biosynthesis II (mammalian)|g__Parvimonas.s__Parvimonas_sp_oral_taxon_110	0	0	0	0	0	0	0	0	0	0	0	0	0	0	0	18.5947	0	0	0	0	0	0	0	1.54691	0	0	0	0	0	0	0	0	0	0	0	6.28855	0	0	0	0	0	0	0	0	0	0	0
COA-PWY-1: coenzyme A biosynthesis II (mammalian)|g__Peptostreptococcus.s__Peptostreptococcus_stomatis	0	1.68413	4.27026	2.96364	0	0	2.48905	0	0	0	2.79081	0	0	0	0	1.52209	7.10051	1.43945	0	0	0.798292	1.16329	5.5042	2.06848	1.17265	3.44166	0	0	0	0.949571	0	0.890175	0	0.495653	5.76077	0	4.65473	0	0	0	0	0	0	3.21504	1.41886	0	0
COA-PWY-1: coenzyme A biosynthesis II (mammalian)|g__Porphyromonas.s__Porphyromonas_catoniae	0	1.13879	0	1.27615	0	0	0	0.862629	0	0	0.868462	0	0	0	0.841647	0.761341	1.59773	2.08075	3.92007	3.36441	0	0	1.11084	1.82971	0	0.791485	0	0	0	0	0.965614	0	0	1.14017	1.95967	0	3.00358	0	0	0	2.65462	3.80211	2.92146	0	1.40594	0	0
COA-PWY-1: coenzyme A biosynthesis II (mammalian)|g__Porphyromonas.s__Porphyromonas_endodontalis	0	0	0	0	0	0	0	0	0	0	0	0	0	0	1.12005	0	0	0	0	0	0	0	0	0	0	0	0	0	0	0	0	0	0	0	0	0	0	3.57743	0	0	0.469372	0	0	0	0	0	0
COA-PWY-1: coenzyme A biosynthesis II (mammalian)|g__Porphyromonas.s__Porphyromonas_sp_oral_taxon_279	0	50.1255	23.0295	10.8127	8.85256	0	43.4613	47.614	29.407	25.9774	67.0428	28.6712	0	19.6646	2.97308	0.737968	137.475	43.1496	22.781	18.6696	5.40597	12.0239	6.35408	2.43927	7.70992	26.9681	0	75.9209	50.4756	13.0765	42.0825	0	2.56135	43.6442	57.018	4.64238	78.5522	19.9374	1.26153	15.9192	127.986	42.9436	2.30207	25.2436	10.7338	8.27297	4.76927
COA-PWY-1: coenzyme A biosynthesis II (mammalian)|g__Prevotella.s__Candidatus_Prevotella_conceptionensis	0	0	0	0	0	0	0	0	0	0	0	0	0	0	0	0	0	0	0	0	0	0	0.827062	0.21776	0	0	0	0	0	0	2.0859	0	0	1.37034	0	0	0	0	0	0	0	4.20153	0	0	0	0	0
COA-PWY-1: coenzyme A biosynthesis II (mammalian)|g__Prevotella.s__Prevotella_denticola	0	2.17448	0	0	0	0	0	0	2.19899	2.1822	0	8.15738	0	0	0.842739	1.98789	0	2.19322	0	0	0	0	0	6.00945	0	0	0	0	0	0	0	0	0	0	0	0	0	0	0	0	0	0	0	2.97185	2.08825	0	0
COA-PWY-1: coenzyme A biosynthesis II (mammalian)|g__Prevotella.s__Prevotella_intermedia	0	0	0	0	0	0	0	0	0	0	0	0	0	0	0	0	0	0	0	0	1.07095	0	5.34604	0	0	2.33551	0	0	0	0	0	9.15561	0	0	0	0	0	1.58334	0	0	1.17177	0	0	0	0.936018	0	0
COA-PWY-1: coenzyme A biosynthesis II (mammalian)|g__Prevotella.s__Prevotella_loescheii	0	4.54981	0	0	0	0	0	0	0	0	0	0	0	0	0.445369	0	0	0	0	1.17045	0	0	2.5579	0.153419	0	0	0	0	0	0	0	0	0	0	0	0	0.379351	0	0	0	0	0	0	0	0	0	0
COA-PWY-1: coenzyme A biosynthesis II (mammalian)|g__Prevotella.s__Prevotella_melaninogenica	58.943	151.698	52.9986	173.653	36.8349	42.8531	58.0006	183.933	202.642	219.916	19.0769	60.6239	16.2406	63.5499	25.3369	37.8384	125.761	28.18	77.379	84.019	106.578	25.9439	38.7084	31.0563	229.072	147.823	32.4342	35.7072	75.6736	58.562	23.3663	0.992733	63.2478	28.7941	82.4988	22.9594	22.3438	12.9488	51.9461	40.326	55.4845	62.2922	36.6272	62.4235	28.7964	78.395	122.946
COA-PWY-1: coenzyme A biosynthesis II (mammalian)|g__Prevotella.s__Prevotella_pleuritidis	0	0	0	0	0	0	0	0	0	0	0	0	0	0	0	0	0	0	0	0	0	0	6.02965	0	0	0	0	0	0	0	2.13005	1.06637	0	0	0	0	0	0	0	0	1.1814	0	0	0	0	0	0
COA-PWY-1: coenzyme A biosynthesis II (mammalian)|g__Prevotella.s__Prevotella_salivae	77.0119	0	0	69.6549	29.6852	4.86714	3.12792	6.82065	6.60698	19.9933	17.7413	5.07287	84.1002	11.8511	19.9353	11.7335	6.79215	2.14706	4.20306	11.1435	9.61285	40.0126	8.59433	14.2613	37.2493	35.0858	0	0	0	20.5474	0	14.0952	17.0041	1.24757	23.937	20.4119	0.696785	0	6.89684	2.34465	1.24139	4.09164	5.53281	10.7521	14.1508	12.5582	0
COA-PWY-1: coenzyme A biosynthesis II (mammalian)|g__Prevotella.s__Prevotella_sp_oral_taxon_306	0	0	0	0	9.96444	0	0	0	0	0	0	0	0	0	0	7.81589	0	0	0	0	0	0	0	4.5135	0	16.1575	0	0	0	0	0	0	0	0	0	0	0	0	21.3824	0	0	0	0	0	0	0	0
COA-PWY-1: coenzyme A biosynthesis II (mammalian)|g__Prevotella.s__Prevotella_veroralis	11.0201	0	0	4.85814	18.4156	2.23235	4.43507	43.1397	4.21793	14.2629	1.45782	6.92915	8.84705	18.148	6.18939	22.5111	6.2458	2.71537	0	0	0	16.6565	4.42512	0	20.9463	12.8168	1.11631	0	0	6.24237	0	0	0	0.940207	0	68.1872	0	0	0	0	1.16996	3.1476	9.66711	1.76765	14.6926	3.29884	0
COA-PWY-1: coenzyme A biosynthesis II (mammalian)|g__Propionibacterium.s__Propionibacterium_acnes	0	0	0	0	0	0	0	0	0	0	0	0	0	0	0	0	0	0	0	0	0	0	0	0.120713	0	0	0	0	0	0	0	0	0	0	0	0	0	0	0	0	0	0	0	0	0	0	0
COA-PWY-1: coenzyme A biosynthesis II (mammalian)|g__Propionibacterium.s__Propionibacterium_propionicum	0	0	0	0	0	0	0	0	0	0	0	1.24611	0	0	0	0	0.872303	0	0	0	0	0	1.26066	0.670201	0	0	0	0	0	0	0	0	0	0	0	0	0.943987	0	0.214184	0	1.51075	0	0	0	0	0	0
COA-PWY-1: coenzyme A biosynthesis II (mammalian)|g__Rothia.s__Rothia_aeria	0	0	0	0	0	7.0029	0	0	0	0	0	0	0	0	0	0.283147	0	0	3.02702	0	2.3998	0	3.23759	0.599292	1.00238	1.06224	25.697	6.50471	0	0.458335	4.02357	0	2.27733	3.33394	0	0	3.36662	0	2.21383	1.56737	1.33991	1.70115	0	0	0	1.05699	0
COA-PWY-1: coenzyme A biosynthesis II (mammalian)|g__Rothia.s__Rothia_dentocariosa	0	0	0	0	0	4.63341	2.02879	0	0	0	2.29594	3.05715	0	1.43835	0.540958	2.2335	3.93578	0	2.44694	0.607304	0.931418	0	3.86517	0.045799	0	0	13.9221	0	0	1.97181	0.544637	5.65313	3.64077	10.4329	0	1.4738	4.08965	0	7.78833	1.21707	1.16145	1.92596	3.50104	2.04578	0	0	0
COA-PWY-1: coenzyme A biosynthesis II (mammalian)|g__Rothia.s__Rothia_mucilaginosa	0	16.7298	5.1445	0	0	16.8346	2.61833	0	0	0	5.50651	13.3055	0	43.0352	0.634736	0.29388	2.96721	2.38599	25.9689	9.90448	44.5384	0.991713	111.413	2.12082	2.72086	0	35.2022	24.8272	76.4304	33.3309	45.9923	6.05478	10.3917	56.3968	0	0	16.1819	0	17.7875	5.78078	29.3492	5.29871	4.03554	1.47762	0	2.73908	0.966272
COA-PWY-1: coenzyme A biosynthesis II (mammalian)|g__Scardovia.s__Scardovia_wiggsiae	1.50107	1.75376	0	3.86997	0	0	0	1.479	0	2.79633	1.3532	1.48878	0	0	2.74257	0	0	9.47269	0	0	0	3.61596	0	12.8706	0	0	0	0	0	0	0	0	0	0.563854	0	0	0	0	0	0	0	1.19488	0	11.7405	14.9235	0	2.43177
COA-PWY-1: coenzyme A biosynthesis II (mammalian)|g__Selenomonas.s__Selenomonas_artemidis	0	1.65578	0	0	0	0	0	0	0	0	0	0	0	0	0.427147	0	0	0	0	0	0	0	0	1.46125	0	0	0	0	0	0	0	0	0	0	0	0	0	0	0.519143	0	0	0.716039	0	0	0	0	0
COA-PWY-1: coenzyme A biosynthesis II (mammalian)|g__Selenomonas.s__Selenomonas_flueggei	1.80764	0	4.57878	8.37546	2.83275	0	2.38367	0	0	2.00002	0	1.62375	4.745	2.10387	1.1878	0	0	0	0	4.75587	1.69924	6.12644	1.83139	1.25989	0	0	0	0	0	0	0	18.6185	28.3646	0	0	0	0	0	4.03651	4.17695	1.62116	1.89976	9.39591	0	2.39533	5.97538	0
COA-PWY-1: coenzyme A biosynthesis II (mammalian)|g__Selenomonas.s__Selenomonas_infelix	0	0	0	0	0	0	0	0	0	0	0	0	0	0	0	0	0	0	5.5803	0	0	0	0	0.346192	0	0	0	0	0	0	0	0	0	0	0	0	0	0	0	0	0	0	0	0	0	1.21318	0
COA-PWY-1: coenzyme A biosynthesis II (mammalian)|g__Selenomonas.s__Selenomonas_noxia	0	4.41999	0	9.30375	0	0	0	0	0	0	0	0	0	1.55359	0	0	3.55943	0	0	0.939986	0	1.21417	0	3.41621	0	0	0	0	0	1.55207	0	4.3136	0	0	0	0	0	0	1.876	0	0	2.81662	15.5543	0	0	2.43835	6.76656
COA-PWY-1: coenzyme A biosynthesis II (mammalian)|g__Shuttleworthia.s__Shuttleworthia_satelles	0	0	0	0	0	0	0.99663	0	0	0	0	1.79661	0	0	0.348066	0	0	0	0	0	0	0	0	0	0	1.15302	0	0	0	1.1142	0	0	0	0	0	0	0	0	0	0	0	0	0	0	1.20514	0	0
COA-PWY-1: coenzyme A biosynthesis II (mammalian)|g__Solobacterium.s__Solobacterium_moorei	9.74234	8.01729	7.12454	13.1853	13.0444	7.01052	14.472	44.7634	12.9735	4.91043	10.4427	5.78747	11.4681	1.62675	5.6273	8.83773	10.1384	5.71595	2.39291	1.35036	5.63228	15.0566	5.86201	37.1899	14.3687	17.6103	4.97598	0	0	2.14932	1.11851	5.61596	3.62133	3.17641	17.6329	9.42805	2.13192	4.15323	1.8803	5.67839	4.91381	12.9576	6.78234	11.7957	10.1417	14.0096	2.68985
COA-PWY-1: coenzyme A biosynthesis II (mammalian)|g__Stomatobaculum.s__Stomatobaculum_longum	0	0	0	0	0	0	0	0	0	0	0	1.64433	0	0	0	0	0	0	0	0	0	1.5314	0	0.455385	0	0	0	0	0	0	0	0	0	0	0	0	0	0	0	0	0	0	0	0	0	0	0
COA-PWY-1: coenzyme A biosynthesis II (mammalian)|g__Streptococcus.s__Streptococcus_australis	0	12.7179	6.08158	0	0	0	0	0	0	0	0	2.01404	0	1.66416	0	0	2.38102	0	2.48867	0	0	0	0	0.351928	0	0	6.02374	4.89089	12.5947	4.17144	14.4053	0	0	28.4127	1.74692	0	9.9008	20.5498	0.461388	4.26395	14.6997	5.85485	0	0	0	0	0
COA-PWY-1: coenzyme A biosynthesis II (mammalian)|g__Streptococcus.s__Streptococcus_cristatus	0	0	0	0	0	0	0	0	0	0	0	0	0	0	0	0	0	0	0	0	0	0	0	0	0	0	0	0	0	0	0	0	0	0.393701	0	0	0.502163	0	0	0	0	0	0	0	0	0	0
COA-PWY-1: coenzyme A biosynthesis II (mammalian)|g__Streptococcus.s__Streptococcus_gordonii	0	0	0	0	0	2.61302	0	0	0	0	1.19128	1.70675	0	0	0.857858	0	0	3.626	0	0	1.09132	1.35098	1.1573	0.0605292	0	0	0	0	0	0	0	0	0	0	0	2.34638	0	0	0	0.968223	0.488072	2.30801	0	0	0	2.09983	0
COA-PWY-1: coenzyme A biosynthesis II (mammalian)|g__Streptococcus.s__Streptococcus_infantis	1.7106	19.0204	3.60886	6.19061	2.42218	11.0461	20.7483	5.0822	4.91333	1.81743	4.47399	18.3222	0	25.3824	1.12844	4.11613	5.55272	4.57406	14.5174	4.02603	13.6011	4.35916	16.1218	4.39143	3.98842	3.02272	28.9036	4.20761	10.3802	7.65187	27.9372	0	4.59506	19.0741	17.3348	0.590378	10.6887	38.7406	2.67744	14.4611	15.3583	13.0737	6.49419	1.59551	4.99829	5.16805	5.76761
COA-PWY-1: coenzyme A biosynthesis II (mammalian)|g__Streptococcus.s__Streptococcus_mitis_oralis_pneumoniae	6.13522	20.0843	14.1207	6.04366	5.53856	40.1969	29.7795	27.0948	12.0513	36.778	12.786	49.6613	6.9763	19.7864	34.1646	27.7233	18.2779	18.859	26.6326	19.7023	49.4545	17.4546	22.7801	5.03479	8.11719	11.8214	73.8533	52.9249	11.1289	7.70973	65.1331	23.0101	31.4858	65.0925	14.7525	20.435	26.6369	9.24313	25.903	87.8412	12.8455	40.7823	38.4365	8.48197	17.2273	10.4375	3.3779
COA-PWY-1: coenzyme A biosynthesis II (mammalian)|g__Streptococcus.s__Streptococcus_mutans	0	0	0	0	0	0	0	0	0	0	0	0	0	0	0.589345	0	0	0	0	0	0	0	0	0.0335007	0	0	0	0	0	0	0	3.97227	0	0	0	0	0	0	0	0	0	0	0	0	1.32193	0	0
COA-PWY-1: coenzyme A biosynthesis II (mammalian)|g__Streptococcus.s__Streptococcus_oligofermentans	0	0	0	0	0	0	0	0	0	0	1.57755	0	0	0	0	0	0	0	0	0	0	0	0	0	0	0	2.62283	0	0	0	0	0	0	0	0	0	0.61793	0	0	0	0.645699	2.02579	0	0	0	0	0
COA-PWY-1: coenzyme A biosynthesis II (mammalian)|g__Streptococcus.s__Streptococcus_parasanguinis	26.0615	2.92654	0	3.42802	4.18867	12.3444	6.53303	1.59022	7.05663	8.90744	0	12.9936	9.51695	19.9497	6.95065	9.281	3.27432	2.19356	4.9214	1.76478	32.4384	6.09689	39.0259	4.12194	8.96276	0	9.0582	3.05625	13.5071	33.0193	2.2164	21.6502	7.11718	7.6216	1.50708	19.224	1.25289	9.85382	10.0317	13.6775	7.46134	15.1371	2.63269	2.29786	5.67397	5.17935	14.1938
COA-PWY-1: coenzyme A biosynthesis II (mammalian)|g__Streptococcus.s__Streptococcus_pseudopneumoniae	0	0	0	0	0	0	0	0	0	0	0	0	0	0	0	0	0	1.99998	1.90274	4.04791	0	0	0	0	0	0	0	0	0	0	0	2.86361	0	0	0	0	2.97008	0	0	0	0	0	0	0	0	0	0
COA-PWY-1: coenzyme A biosynthesis II (mammalian)|g__Streptococcus.s__Streptococcus_sanguinis	2.40441	5.83601	21.1483	3.14414	2.12293	31.5902	10.9456	4.14879	4.93336	8.69927	10.6617	19.1436	3.33681	0	7.77189	6.15879	4.04664	20.1349	18.3554	4.53866	7.8712	8.85953	14.2079	4.5353	0	1.997	41.423	16.1662	6.692	9.8635	26.1136	2.42768	8.80835	28.4349	2.34742	3.43494	17.4831	5.86847	3.8285	19.9723	7.27681	2.4254	9.8831	10.7745	16.1645	9.66011	3.58465
COA-PWY-1: coenzyme A biosynthesis II (mammalian)|g__Streptococcus.s__Streptococcus_sp_M334	0	0	0	0	0	0	0	0	0	0	0	0	0	0	0	0	0	0	0	0	9.41909	0	0	0	0	0	0	0	0	0	0	0	8.20742	0	0	0	0	0	0	0	0	0	0	0	0	0	0
COA-PWY-1: coenzyme A biosynthesis II (mammalian)|g__Streptococcus.s__Streptococcus_sp_SK140	0	0	0	0	0	0	0	0	0	0	0	0	0	5.9259	0	0	0	0	0	0	0	0	0	1.57013	0	0	0	0	0	0	0	0	0	0	0	0	3.67644	0	0	0	0	0	0	0	0	0	0
COA-PWY-1: coenzyme A biosynthesis II (mammalian)|g__Streptococcus.s__Streptococcus_tigurinus	0	0	0	0	0	3.58255	1.91837	0	0	0	0	0	0	0	1.18576	0	1.02286	0	0	0	0	0	0	0	0	0	6.78346	0	0	0	0	0	0	0	0	0	0.806928	0	0.361881	2.48696	0	1.58943	0	0	0	0	0
COA-PWY-1: coenzyme A biosynthesis II (mammalian)|g__Treponema.s__Treponema_socranskii	0	0	0	0	0	0	0	0	0	0	0	0	0	0	0	0	0	0	0	0	0	0	0	0	0	0	0	0	0	0	0	0	0	0	0	0	0	1.88628	0	0	0	0	0	0	0	0	0
COA-PWY-1: coenzyme A biosynthesis II (mammalian)|g__Veillonella.s__Veillonella_atypica	75.8578	4.53037	34.5256	23.5171	112.407	41.6151	11.0383	26.0449	15.3488	8.47204	6.15838	13.5484	25.3814	35.3032	38.267	40.3191	9.64943	10.5492	21.3416	24.9116	14.8926	29.8731	27.5961	37.3471	38.1208	13.0381	0	1.36815	5.60258	37.3189	2.57787	42.4561	36.9641	8.41939	7.54436	108.493	0.424927	2.3313	36.7146	33.2755	6.27646	10.5429	75.11	6.87135	20.8016	83.756	30.9184
COA-PWY-1: coenzyme A biosynthesis II (mammalian)|g__Veillonella.s__Veillonella_dispar	14.4064	14.3147	44.768	17.7619	18.2246	61.6541	8.82302	21.7051	33.0149	15.4186	5.50933	31.397	28.5735	41.2562	14.1848	16.2702	5.40737	10.3119	9.32088	12.4968	62.8048	8.71455	26.0784	20.0016	31.6238	5.80606	15.4499	15.7219	47.3404	64.5677	4.1333	20.5072	18.0508	9.4921	12.3781	19.3969	9.72761	2.71583	50.4685	32.3144	15.9219	11.031	20.434	30.578	13.5799	74.1617	67.891
COA-PWY-1: coenzyme A biosynthesis II (mammalian)|g__Veillonella.s__Veillonella_parvula	3.63733	19.0547	36.5592	23.0026	5.19537	28.0416	7.98942	14.406	13.481	21.2485	6.69325	28.7036	16.1538	3.88303	29.9053	14.1831	35.0486	30.0901	19.5095	13.7415	2.50917	7.79224	9.0457	17.7003	1.61271	7.02251	26.5223	9.1273	13.1636	20.1996	13.9843	17.5961	5.50446	13.5837	4.17564	32.1957	3.94722	11.0539	9.71873	8.7721	11.6755	8.11767	9.1934	33.4464	31.205	42.8965	17.9471
COA-PWY-1: coenzyme A biosynthesis II (mammalian)|g__Veillonella.s__Veillonella_sp_6_1_27	0	0	0	0	0	0	0	0	0	0	0	0	0	0	0	0	0	0	0	0	0	0	0	0	0	0	0	0	0	0	0	0	0	10.5949	0	0	0	0	8.26128	0	0	0	0	0	0	0	0
COA-PWY-1: coenzyme A biosynthesis II (mammalian)|g__Veillonella.s__Veillonella_sp_HPA0037	0	0	0	0	0	0	0	0	0	0	0	0	0	0	0	0	0	0	0	0	0	0	0	0	0	0	0	0	0	0	0	86.8522	0	0	0	0	0	0	0	0	0	0	0	0	0	0	0
COA-PWY-1: coenzyme A biosynthesis II (mammalian)|g__Veillonella.s__Veillonella_sp_oral_taxon_158	0	0	0	0	0	0	0	0	0	0	0	0	0	0	0	0	0	0	0	0	0	0	0	0	0	0	0	0	0	0	0	0	0	0	0	0	0	0	0	0	0	19.3349	0	0	0	0	0
COA-PWY-1: coenzyme A biosynthesis II (mammalian)|g__Veillonella.s__Veillonella_sp_oral_taxon_780	0	0	0	0	0	0	0	0	0	0	0	0	0	0	0.733354	0	0	0	0	0	0	0	0	0	0	0	0	0	0	0	0	0	0	0	0	0	1.43588	0	1.50472	0	0	0	0	0	2.70158	0	0
COA-PWY-1: coenzyme A biosynthesis II (mammalian)|unclassified	64.9785	114.035	169.583	73.2417	65.6581	31.8341	83.9334	134.982	141.303	49.4968	125.264	80.2871	48.0593	58.8748	40.8555	96.3093	96.3547	53.346	61.6106	83.2322	96.8658	99.7437	61.9977	177.944	111.716	149.459	59.5644	28.5074	99.3682	79.7378	50.0505	49.1046	83.2189	68.5979	113.42	76.6015	100.289	53.7337	69.0147	55.6494	114	71.9899	40.7672	134.004	46.4569	97.042	53.1539
COA-PWY: coenzyme A biosynthesis I	534.49	580.426	496.865	551.411	518.721	432.091	410.801	689.187	681.209	621.227	432.583	487.491	378.414	435.859	373.711	446.597	569.912	345.063	392.207	369.672	510.607	461.976	435.349	547.998	635.494	590.581	434.775	404.403	491.602	511.334	434.949	425.456	461.068	474.825	473.459	581.312	387.773	329.541	418.499	447.741	504.412	457.675	366.237	467.797	360.684	550.317	441.92
COA-PWY: coenzyme A biosynthesis I|g__Acidovorax.s__Acidovorax_ebreus	0	0	0	0	0	0	0	0	0	0	0	0	0	0	0	0	0	0	0	0	0	0	0	0.84489	0	0	0	0	0	0	0	0	0	0	0	0	0	0	0	0	0	0	0	0	0	0	0
COA-PWY: coenzyme A biosynthesis I|g__Actinomyces.s__Actinomyces_massiliensis	0	0	0	0	0	0	0	0	0	0	0	0	0	0	0	0	0	0	0	0	0	0	0	0.348971	0	0	0	0	1.54905	0.798764	1.00793	0	0	0	0	0	0	0	0	0	0	1.11478	0	0	0	0	0
COA-PWY: coenzyme A biosynthesis I|g__Actinomyces.s__Actinomyces_naeslundii	0	0.448439	0	1.49032	0	0	0	0.647458	0	0	0	0.842729	0	0	0	0.114203	1.27746	0	0	0	0	0	0.961534	0.797243	0	0	0	0	0	0	0.658519	0	0	0	0	0.609116	0.120197	0	0	0	0.545621	0	0	0	0	0.61843	0
COA-PWY: coenzyme A biosynthesis I|g__Actinomyces.s__Actinomyces_odontolyticus	0	0	1.57158	0	3.34383	1.77366	1.83798	2.05987	0	2.20931	0.69917	2.77919	1.54297	3.06157	0	0.715478	0.585702	1.93984	0	0	1.84588	0	0	0.72973	4.86062	0	0	0	4.75957	6.04656	1.83738	0	0	0.978241	1.81909	1.29184	0.980713	3.2116	0.942549	1.37751	0.762195	0	0	0.953594	0	1.96197	5.33364
COA-PWY: coenzyme A biosynthesis I|g__Actinomyces.s__Actinomyces_sp_ICM39	0	3.99459	0	0	0	0	0	0	0	0	0	0	0	0	0	0	0	0	0	0	0	0	0	2.09316	0	0	0	0	0	0	0	0	0	0	0	0	0	0	0	0	0	0	0	0	0	0	0
COA-PWY: coenzyme A biosynthesis I|g__Actinomyces.s__Actinomyces_sp_ICM47	0	0	0	0	0	0	0	0	0	0	0	0	0	0	5.09058	0	0	0	0	0	0	0	0	11.3639	0	0	0	0	0	0	0	0	0	0	0	0	0	0	2.34063	0	0	0	0	0	0	0	0
COA-PWY: coenzyme A biosynthesis I|g__Actinomyces.s__Actinomyces_sp_oral_taxon_448	0	0	0	0	0	0	0	0	0	0	0	0	0	0	2.4576	0	0	0	0	0	0	0	0	0.105471	0	0	0	0	0	0	0	0	0	0	0	0	0	0	0	0	0	0	0	0	0	0	0
COA-PWY: coenzyme A biosynthesis I|g__Aggregatibacter.s__Aggregatibacter_aphrophilus	0	0	0	0	0	0	0	0	0	0	0	0	0	0	0	0	0	0	0	1.62513	0	0	0	0.469439	0	0	0	0	0	0	0	0	0	0	0	0	0	0	0	1.47738	0	0	0	0	0	0	0
COA-PWY: coenzyme A biosynthesis I|g__Aggregatibacter.s__Aggregatibacter_segnis	0	0	0	0	0	0	0.902541	0	0	0	2.55657	2.02487	0	0	0	0	0	0	3.07843	2.8804	0	0	0.696961	0	0	0	0	2.28051	0.594905	0	1.70231	0	0	2.79439	0.744174	0	0	0	0	0	0	3.2409	0	1.26323	0	0	0
COA-PWY: coenzyme A biosynthesis I|g__Alloprevotella.s__Alloprevotella_tannerae	0	1.50388	7.68112	0	0	0	18.8918	3.75759	0	1.56685	9.86679	4.68124	8.26855	2.45247	1.57293	0.439761	0	3.81932	5.25248	0	0	11.1292	0	0	0	64.7205	0	0	0	0.812737	0	0	1.60813	1.37003	10.3213	3.73322	0.408103	1.5862	0	0	3.67285	4.549	0	5.9978	2.87153	0	0
COA-PWY: coenzyme A biosynthesis I|g__Atopobium.s__Atopobium_parvulum	5.75921	6.45616	5.80466	7.50356	9.20959	2.96139	6.46146	10.3913	11.9511	8.06889	3.17044	12.9388	7.48485	3.6614	11.1275	16.6965	6.94965	8.35998	2.4535	2.56759	6.1923	7.16234	3.75175	19.7297	8.48904	3.77508	7.28921	1.07609	0	4.23674	0	4.78639	5.03199	1.39387	2.27515	21.9214	0.267008	0	6.01353	5.48164	0.676496	9.18178	2.86345	7.2143	15.6377	10.4174	11.9403
COA-PWY: coenzyme A biosynthesis I|g__Capnocytophaga.s__Capnocytophaga_granulosa	0	0	0	0	0	0	0	0	0	0	0	0	0	1.88084	0	0	0	1.34952	0	0	0	0	0	0.422093	0	0	0	0	0	0	1.09536	0	0	0	0	0	0	0	0.491375	0.807332	0	0	0	0	0	0	0
COA-PWY: coenzyme A biosynthesis I|g__Cardiobacterium.s__Cardiobacterium_hominis	0	0	0	0	0	0	0	0	0	0	0	0	0	0	0	0	0	0	0	0	0.439276	0	0.379235	0.326432	0	0	0	0	0	0.718488	0.774692	0	0	0.233523	0	0	0.41033	0	0	0	0	0	0	0	0	0	0
COA-PWY: coenzyme A biosynthesis I|g__Clostridiales_Family_XIII_Incertae_Sedis_noname.s__Eubacterium_infirmum	0	0.53129	0.711021	2.11631	0	0	0	0	2.51259	0	3.02246	4.44706	2.91599	0	1.23359	0.492131	3.03047	3.19256	0	0	0	1.78304	1.50702	1.28038	1.63458	0	0	0	0	0.52762	0	0	0	0.234701	0.780565	4.0553	0.121349	0	0	0	0	3.69426	0	4.45359	3.22503	6.10774	0
COA-PWY: coenzyme A biosynthesis I|g__Escherichia.s__Escherichia_coli	1.61091	0	0	0	0	0	0	0	0	0	0	0	0	0	0	0.257123	0	0	0	0	0	0	0	0.200257	0	0	0	0	0	0	0	0	0	0	0	0	0	0	0	0	0	0	0	0	0	0	25.4812
COA-PWY: coenzyme A biosynthesis I|g__Fusobacterium.s__Fusobacterium_nucleatum	1.71629	4.97687	1.40729	0	0	2.07935	0.78032	1.55348	1.95137	0	2.70577	5.38265	2.62241	5.38414	1.22153	2.31713	3.88285	7.25582	7.99805	3.48919	1.6986	1.32614	8.17506	6.10945	0	1.02206	7.82842	0	0.850888	2.27687	9.34401	5.28647	0	2.81646	1.48763	2.25738	1.77134	4.19558	2.22935	2.33012	3.65786	9.35153	0	7.14403	2.28109	0.920218	0
COA-PWY: coenzyme A biosynthesis I|g__Granulicatella.s__Granulicatella_adiacens	0	1.50026	1.5645	1.26641	0	1.99282	3.73673	0	0	3.8066	0	2.26302	0	0	4.25375	0.167056	2.70925	3.15975	3.42877	0.733823	0.896911	3.22477	1.60488	1.43615	2.72492	1.23793	1.27566	1.63841	4.92679	3.449	0.928846	0	0	1.60356	0	1.53977	0.351183	4.54015	0	5.57916	0.181536	0.866616	0	0	0.93035	0	0
COA-PWY: coenzyme A biosynthesis I|g__Haemophilus.s__Haemophilus_haemolyticus	0	0	0	0	0	0	0	0	0	1.17272	0	0	0	0	0.18971	0	0	0	0	0.721981	0	0	0	0	0	0	0	0	0	0	0	0	1.43093	0.432203	0	0.634689	0.425704	0	0	0.361933	0	0	0	0	0	0	0
COA-PWY: coenzyme A biosynthesis I|g__Haemophilus.s__Haemophilus_influenzae	0	0	0	0	0	8.76466	0	0	0	0	0	0	0	0	0.198212	2.97427	0	0	0	0	1.59368	0	0.712598	0	0.845511	0	0	0	0	0.386653	1.98362	0.785708	8.79815	0.519778	0	0	1.18268	0	0	1.69779	0	0	0	0	0	0	0
COA-PWY: coenzyme A biosynthesis I|g__Haemophilus.s__Haemophilus_parahaemolyticus	0	0.476987	0	0	0	0	0	0	0	0	0	0	0	0	0	0	0	0	0	0	0	0	0	0	0	0	0	0	0	0	2.29236	0	0	1.82799	0	0	0	0	0	0	0	0	0	0	0	0	0
COA-PWY: coenzyme A biosynthesis I|g__Haemophilus.s__Haemophilus_paraphrohaemolyticus	0	0	0	0	0	0	0	0	0	0	0	0	0	0	0	0	0	0	0	0	5.05774	0	0	0	0	0	0	1.1603	0	0	0	0	1.77314	1.50276	0	0	0.89293	0	0	0	0	0	0	0	0	0	0
COA-PWY: coenzyme A biosynthesis I|g__Haemophilus.s__Haemophilus_sputorum	0	0	0	0	0.878411	0	1.61548	0.778301	0	0	0	2.44182	0	1.59397	0	0	1.29523	0	0	1.05629	0	0	0	0.277205	0	0	0	2.86065	0	1.71433	5.22806	0	0	0	0	0	1.33629	1.11547	2.60709	1.08162	0	1.35317	0	0	0.88227	0	0.694392
COA-PWY: coenzyme A biosynthesis I|g__Kingella.s__Kingella_denitrificans	0	0	0	0	0	0	0	0	0	0	0	0	0	0	0	0	0	0	0	1.44221	1.62287	0	0.381584	0	0	0	0	0	0	0	0	0	0	0	0	0.586016	0	0	0	0.970535	0	0	0	0	0	0	0
COA-PWY: coenzyme A biosynthesis I|g__Lachnoanaerobaculum.s__Lachnoanaerobaculum_saburreum	0	0	0	0	0	0	0	0	0	0	0	0	0	0	0	0	0	0	0	0	0	0	0	0	0	0	0	0	0	0	0	0	1.1155	0	0	0	0	0	0	0	0	0	0	0	0	0	0
COA-PWY: coenzyme A biosynthesis I|g__Lachnospiraceae_noname.s__Lachnospiraceae_bacterium_ICM7	0	2.45549	9.20198	0	0	0	1.97643	0	0.96735	0	0	1.66116	0	0	0	0	0	2.41262	0.642932	1.60681	0	1.56156	0.70244	0.547363	1.38597	0.711641	1.90332	0	7.38114	2.59329	0.739053	0	1.51568	2.15539	0	0	2.43309	2.91834	0	0.849589	2.80879	0	0	1.59182	0	0	0
COA-PWY: coenzyme A biosynthesis I|g__Lautropia.s__Lautropia_mirabilis	0	1.10426	3.97426	0	0	0	0	0	0	0	0	6.4584	1.20884	0.500131	0.473559	0.0652659	0	3.5401	0.977873	0.468207	2.02274	0	1.50026	0.317092	0	0	0	9.18853	6.59838	1.65819	16.2255	7.88771	2.85913	7.9901	0	0	1.62803	13.2049	9.89029	8.74717	2.56029	0	0	0.57763	1.06958	0	0
COA-PWY: coenzyme A biosynthesis I|g__Leptotrichia.s__Leptotrichia_buccalis	0	0	0	0	0	0	0	0	0	0	0	0	0	0	0	0	0	0.64163	0	0	0	0	0	0.446886	0	0	0	0	0	0	0	0	1.52797	0	0	0	0	0	0	0	0	3.47857	0	0	0	0	0
COA-PWY: coenzyme A biosynthesis I|g__Leptotrichia.s__Leptotrichia_hofstadii	0	0	0	0	0	0	0	0	0	0	0	0	0	0	0	0	0	0	0.592608	0	0	0	0.976079	0.161132	0	0	0	0	1.54656	0	0	0	0	0	0	0	0	0	0	0	0	2.09929	0	0	0	0	0
COA-PWY: coenzyme A biosynthesis I|g__Leptotrichia.s__Leptotrichia_wadei	0	0	0	0.717091	0	0	0	1.84928	0	0	0	0	2.4194	0	0	0	0	0	0	0	0	0	0	0.195753	1.83085	0	0.816899	0	1.50947	0	0	0	2.33464	0	0	1.34178	0	0	0	0.999823	0	0	0	0	0	1.43613	0
COA-PWY: coenzyme A biosynthesis I|g__Megasphaera.s__Megasphaera_micronuciformis	13.0949	0	0	2.19591	18.1965	0	0	5.72024	3.60173	3.14476	1.3834	6.2794	4.23616	7.44442	9.37253	7.22346	0	2.44329	2.8484	5.62313	5.6787	1.76642	6.11873	11.1941	7.2356	0.693605	0	0	1.10735	9.83726	0	16.8847	13.5371	0.519635	6.41014	13.4877	0	0	9.57969	6.24342	5.38019	2.97605	27.3122	3.0803	4.00116	9.89402	4.817
COA-PWY: coenzyme A biosynthesis I|g__Neisseria.s__Neisseria_macacae	0	0	0	0	0	8.76533	0	0	0	0	1.50683	4.5328	0	0.796161	0	0	0	4.57769	2.67444	2.05593	0	0	2.19524	0.205473	0	0	12.0595	0	0	0	11.5329	0	0	0	0	3.82635	2.6223	6.52218	0	0	0	6.02123	0	8.31487	0	0	0
COA-PWY: coenzyme A biosynthesis I|g__Neisseria.s__Neisseria_sp_oral_taxon_014	0	0	0	0	0	0	0	0	0	0	0	0	0	0	0	0	0	0	0	0	0	0	0	0	0	0	0	0	0	0	0	0	0	0	0	0	0	0	0	0	3.10965	0	0	0	0	0	0
COA-PWY: coenzyme A biosynthesis I|g__Parvimonas.s__Parvimonas_micra	0	2.59062	5.72342	0	0	0	3.31411	0	9.42552	0.862951	14.5352	0	1.12202	4.48832	6.31024	0	0	0	1.66401	0	0	0	6.14674	0.602931	0.546952	3.06817	0	1.19529	0	0.291877	0	1.49596	0	1.45262	3.79806	2.76183	2.08332	0	0	0	1.0915	5.93476	0	2.04583	2.75049	0	0
COA-PWY: coenzyme A biosynthesis I|g__Parvimonas.s__Parvimonas_sp_oral_taxon_110	0	0	0	0	0	0	0	0	0	0	0	0	0	0	0	7.46781	0	0	0	0	0	0	0	1.24205	0	0	0	0	0	0	0	0	0	0	0	5.81531	0	0	0	0	0	0	0	0	0	0	0
COA-PWY: coenzyme A biosynthesis I|g__Peptostreptococcus.s__Peptostreptococcus_stomatis	0	1.59699	4.44236	2.76967	0	0	2.76354	2.07093	0	0	3.0671	0	0	0	0	1.34825	6.0957	2.87943	2.22516	0	1.22142	1.26639	4.40048	2.38741	1.29127	3.17246	0	0	0	1.03118	0	0.781189	0	0.403974	7.32275	0	5.53082	0	0	0	0	4.33817	0	3.799	2.23464	0	0
COA-PWY: coenzyme A biosynthesis I|g__Porphyromonas.s__Porphyromonas_catoniae	0	1.92363	0	1.56464	0	0	0	0.862629	0.952164	1.50581	0.749325	0	0	0	0.836785	0.554322	0.756549	2.30166	3.84192	3.05429	0	0	0.819701	2.24333	0	0.683236	0	0	0.574578	0.550494	1.86737	0	0	1.31447	2.85418	0	1.4928	1.08262	0	0	2.20653	3.64301	0	0	1.40594	0	0
COA-PWY: coenzyme A biosynthesis I|g__Porphyromonas.s__Porphyromonas_sp_oral_taxon_279	0	48.3721	19.9673	13.7403	8.85256	0	43.263	46.8133	27.902	28.7403	69.4171	26.8867	0	18.1579	2.56289	0.708177	127.462	40.1074	23.9223	17.2716	4.8923	12.0601	6.46398	2.91487	8.18587	26.9681	0	75.888	52.9962	11.8536	44.8574	0	2.50926	44.8552	57.018	5.49905	77.5455	22.8397	0.658082	15.2292	121.597	44.9328	3.24903	25.2436	9.28175	8.27297	4.61279
COA-PWY: coenzyme A biosynthesis I|g__Prevotella.s__Candidatus_Prevotella_conceptionensis	0	0	0	0	0	0	0	0	0	0	0	1.97535	0	0	0	0	1.04852	0	0	0	0	0	0.827062	0.299234	0	0.674742	0	0	0	0	2.2359	0	0	1.37034	0	0	0	0	0	0	0	4.20153	0	0	0	0	0
COA-PWY: coenzyme A biosynthesis I|g__Prevotella.s__Prevotella_denticola	1.842	4.16663	0	0	0	0	3.2018	0	2.19899	2.59184	0.752335	8.15738	0	0	0.842739	1.98789	0	2.19322	0	0	0	0	0	6.00945	0	0	0	0	0	0	0	0	0	0	0	0	0	0	0	0	0.168055	0	0	6.42123	2.08825	0	0.626538
COA-PWY: coenzyme A biosynthesis I|g__Prevotella.s__Prevotella_intermedia	0	0	0	0	0	0	0	0	0	0	0	0	0	0	0.206055	0	0	0	0	0	1.40239	0	5.34604	0	0	6.52482	0	0	0	0	0	9.15561	0	0	0	0	0	1.58334	0	0	2.31612	0	1.26823	0	0.936018	0	0
COA-PWY: coenzyme A biosynthesis I|g__Prevotella.s__Prevotella_loescheii	0	4.54981	0	0	0	0	0.723898	0	0	0	0	0	0	0.523921	0.500829	0	0	0	1.89822	1.17045	0.382575	0	3.23124	0.404176	0	0	1.40946	0	0	0.485364	0	0	0	0	0	0	1.26185	0	0	0	1.74995	0	0	0.709156	0	0	0
COA-PWY: coenzyme A biosynthesis I|g__Prevotella.s__Prevotella_marshii	0	0	0	0	0	0	0.715533	0	0	0	0	0	0	0	0	0	0	0	0	0	0	0	0	0	0	0	0	0	0	0	0	0	0	0	0	0	0	0	0	0	0	1.54523	0	0	0	0	0
COA-PWY: coenzyme A biosynthesis I|g__Prevotella.s__Prevotella_melaninogenica	61.6203	163.042	52.9986	188.329	40.3322	48.9347	58.0006	183.933	217.732	225.777	19.0769	60.6239	16.2406	63.5499	25.3369	37.8384	125.761	28.18	77.379	84.019	106.578	26.5019	38.7084	31.0563	229.072	147.823	41.5219	41.2721	96.4062	58.562	23.3663	0.992733	63.2478	28.7941	82.4988	23.6175	22.3438	16.4838	51.9461	40.326	55.4845	62.2922	36.6272	62.4235	29.9931	78.395	123.991
COA-PWY: coenzyme A biosynthesis I|g__Prevotella.s__Prevotella_pleuritidis	0	0	0	1.25083	0	0	0	0	0	0	0	0	0	0	0	0	0	0	0	0	0	0	6.02965	0	0	0	0	0	1.02166	0	2.75675	1.06637	0	0	0	0	0	0	0	0	1.48749	0	0	0	0.773987	0	0
COA-PWY: coenzyme A biosynthesis I|g__Prevotella.s__Prevotella_salivae	90.5242	0	1.35067	69.6549	35.2564	4.86714	6.18596	21.3517	7.37399	26.6811	21.8444	7.08019	94.0963	11.8511	20.4735	14.7042	10.6095	5.13851	5.77864	12.4912	13.5602	50.6625	8.65311	15.3488	42.0668	36.8162	0	3.08571	1.08629	22.9063	0	14.0952	18.7685	1.68457	23.937	21.1809	0.696785	0	9.15441	2.34465	1.86985	4.87815	6.6392	10.7521	14.3203	13.6189	6.70961
COA-PWY: coenzyme A biosynthesis I|g__Prevotella.s__Prevotella_sp_C561	0	0	0	0	0	0	0	0	30.5349	0	0	0	0	0	0	0	0	0	0	0	0	55.3788	0	23.6456	0	0	0	0	0	0	0	0	0	0	0	0	0	0	7.28968	0	0	0	0	0	0	0	0
COA-PWY: coenzyme A biosynthesis I|g__Prevotella.s__Prevotella_sp_oral_taxon_306	0	0	0	0	9.96444	0	0	0	0	0	0	0	0	0	0	9.4365	0	0	0	0	0	0	0	4.5135	0	18.9977	0	0	0	0	0	0	0	0	0	0	0	0	21.3824	0	0	0	0	0	0	0	0
COA-PWY: coenzyme A biosynthesis I|g__Prevotella.s__Prevotella_veroralis	11.0201	0	0	4.85814	20.0149	2.23235	4.43507	43.1397	6.48288	14.6283	1.45782	6.92915	9.9669	18.148	6.36156	22.5111	6.2458	3.32492	0	0	0	16.6565	5.40553	0	20.9463	12.8168	1.11631	0	0	7.22732	0	0	0	1.38479	0	68.1872	0	0	0	0	1.16996	3.1476	9.75552	1.76765	14.6926	6.29565	0
COA-PWY: coenzyme A biosynthesis I|g__Propionibacterium.s__Propionibacterium_acnes	0	0	0	0	0	0	0	0	0	0	0	0	0	0	0	0	0	0	0	0	0	0	0	0.136849	0	0	0	0	0	0	0	0	0	0	0	0	0	0	0	0	0	0	0	0	0	0	0
COA-PWY: coenzyme A biosynthesis I|g__Propionibacterium.s__Propionibacterium_propionicum	0	0	0	0	0	0	0	0	0	0	0	2.66387	0	0	0	0	1.01247	0	0	0	1.52446	0	2.10632	0.768296	0	0	0.708165	0	0	0	0	0	0	0	0	0	1.19377	0	0.167868	0	2.46198	0	0	0	0	0	0
COA-PWY: coenzyme A biosynthesis I|g__Rothia.s__Rothia_dentocariosa	0	0	0	0	0	4.55554	1.72008	0	0	0	2.52106	0.955517	0	1.46403	0.651113	2.28131	3.10428	0	2.0278	0.466988	0.70688	1.69119	4.17219	0.0334402	0	0	10.7474	1.02486	0	1.9196	0	5.31096	3.09811	9.74807	0	1.49261	4.08965	0	7.42487	0.943508	1.09076	2.09697	3.24897	3.1508	0	0	0.902389
COA-PWY: coenzyme A biosynthesis I|g__Selenomonas.s__Selenomonas_artemidis	0	1.80266	0	0	0	0	0	0	0	0	0	0	0	0	0.756604	0	1.23004	0	0	0	0	0	0	1.53674	0	0	0	0	0	0	0.994067	0	0	0.254931	0	0	0	0	0.406073	0	0	0.623757	1.15034	0	0	0	0
COA-PWY: coenzyme A biosynthesis I|g__Selenomonas.s__Selenomonas_flueggei	1.44003	0	4.18756	7.71823	2.33522	0	2.10146	0	0	1.67574	0	0	4.15634	1.95172	1.07383	0	0	0	0	4.16062	1.64447	5.47612	1.54627	1.1687	0	0	0	0	0	0	0	15.6351	26.6206	0	0	0	0	0	3.75788	3.96613	1.36895	1.82346	8.84069	0	2.00352	5.06261	0
COA-PWY: coenzyme A biosynthesis I|g__Shuttleworthia.s__Shuttleworthia_satelles	0	0	0	0	0	0	0.778849	0	0	0	0	1.39997	1.4043	0	0.481616	0	0	0	0	0	0	0	0	0	0	0	0	0	0	0.854042	0	0	0	0	0	0	0	0	0	0	0	0	0	0	1.34145	0	0
COA-PWY: coenzyme A biosynthesis I|g__Solobacterium.s__Solobacterium_moorei	8.34723	7.63984	3.53723	15.2554	11.2604	7.01052	12.5994	38.9859	11.0766	4.15251	10.3308	4.12917	10.0448	2.19593	4.19303	6.9729	8.10968	0	2.39291	1.61005	3.89054	12.6383	4.40582	31.2408	6.02617	15.8154	5.00359	0	0	2.27283	1.11851	4.97032	3.78161	2.61028	15.366	8.04288	1.9309	2.93141	1.34656	4.01109	2.33402	6.1762	4.07378	7.14424	8.95099	11.5643	2.55086
COA-PWY: coenzyme A biosynthesis I|g__Streptococcus.s__Streptococcus_australis	0	9.63983	5.56623	0	0	0	0	0	0	0	0	2.01404	0	0	0	0	2.38102	0	1.89129	0	0	0	0	0.191834	0	0	2.60427	4.89089	11.1302	4.17144	7.5857	0	0	28.4127	1.72395	0	9.58905	15.8953	0.393383	2.6	8.64094	5.37023	0	0	0	0	0
COA-PWY: coenzyme A biosynthesis I|g__Streptococcus.s__Streptococcus_gordonii	0	0	0	0	0	4.65366	0	0	0	0	0	2.04636	0	0	0.91104	0	0	5.48994	0	0	1.28704	1.44729	0.818982	0.0596085	0	0	0	0	0	0	0	0	0	0	0	3.06157	0	0	0	0.72019	0.488072	2.7162	0	0	0	2.0647	0
COA-PWY: coenzyme A biosynthesis I|g__Streptococcus.s__Streptococcus_infantis	1.33111	20.3879	3.60886	6.1789	1.94627	12.3597	20.7483	4.31972	4.84592	1.94495	4.53369	15.981	0	25.3824	1.18586	4.11613	5.55272	4.63648	13.0784	4.10723	14.5264	4.25697	15.6614	4.39143	3.23422	3.08438	30.4406	4.30677	7.51001	7.65187	27.9372	0	5.47888	19.0847	16.398	0	11.0963	40.1356	2.67744	14.4611	16.7635	13.0279	4.6862	1.50034	4.20094	2.17343	5.76761
COA-PWY: coenzyme A biosynthesis I|g__Streptococcus.s__Streptococcus_mitis_oralis_pneumoniae	6.13522	15.664	6.85914	5.11966	5.53856	40.1969	24.458	27.0948	9.69618	33.3911	9.01175	47.9679	6.9763	11.2742	30.106	27.7233	16.1227	15.5512	20.8317	17.4772	47.1876	12.747	22.7801	4.25414	6.63215	7.34139	47.8119	49.7021	5.24669	6.025	60.629	16.5214	16.4995	65.0925	12.687	16.5497	26.6369	4.84878	25.903	87.8412	9.99034	30.8451	34.8291	6.27168	14.5061	5.72244	3.3779
COA-PWY: coenzyme A biosynthesis I|g__Streptococcus.s__Streptococcus_mutans	0	0	0	0	0	0	0	0	0	0	0	0	0	0	0.585097	0	0	0	0	0	0	0	0	0.0335007	0	0	0	0	0	0	0	3.97227	0	0	0	0	0	0	0	0	0	0	0	0	0	0	0
COA-PWY: coenzyme A biosynthesis I|g__Streptococcus.s__Streptococcus_oligofermentans	0	0	0	0	0	0	0	0	0	0	1.57755	0	0	0	0	0	0	0	0	0	0	0	0	0	0	0	0	0	0	0	0	0	0	0	0	0	0	0	0	0	0.552593	2.02579	0	0	0	0	0
COA-PWY: coenzyme A biosynthesis I|g__Streptococcus.s__Streptococcus_parasanguinis	34.2972	2.82675	0	5.1921	4.18867	13.2731	4.32053	0	8.65197	10.3125	0	11.9479	7.33992	20.9492	6.95065	9.281	2.70598	2.19356	5.41551	2.94886	32.4384	8.22078	42.616	4.42441	8.96276	0	9.06761	2.95484	13.7416	33.0193	2.35131	19.9277	5.53048	7.6216	0	20.7551	0.818074	12.0319	10.8461	13.6775	5.03933	16.9103	2.78708	2.29786	3.57844	4.88704	14.1938
COA-PWY: coenzyme A biosynthesis I|g__Streptococcus.s__Streptococcus_pseudopneumoniae	0	0	0	0	0	0	0	0	0	0	0	0	0	0	0	0	0	0	1.36738	1.73807	0	0	0	0	0	0	0	0	0	0	0	0	0	0	0	0	1.3308	0	0	0	0	0	0	0	0	0	0
COA-PWY: coenzyme A biosynthesis I|g__Streptococcus.s__Streptococcus_sanguinis	2.54405	5.83601	18.0872	3.07659	2.12293	26.9835	5.83652	5.85207	2.51121	6.23138	10.6617	19.1436	0	0	7.27201	6.15879	4.04664	20.1349	18.3554	4.16384	7.8712	8.85953	13.4345	4.5353	0	0	41.423	16.1662	12.0585	9.8635	26.1136	1.8992	6.32358	28.4349	0	3.43494	17.4831	5.23017	1.25668	19.9723	7.27681	2.4254	9.8831	8.71769	11.5969	9.66011	1.86274
COA-PWY: coenzyme A biosynthesis I|g__Streptococcus.s__Streptococcus_sp_M334	0	0	0	0	0	0	0	0	0	0	0	0	0	0	0	0	0	0	0	0	3.98243	0	0	0	0	0	0	0	0	0	0	0	8.20742	0	0	0	0	0	0	0	0	0	0	0	0	0	0
COA-PWY: coenzyme A biosynthesis I|g__Streptococcus.s__Streptococcus_sp_SK140	0	0	0	0	0	0	0	0	0	0	0	0	0	3.15851	0	0	0	0	0	0	0	0	0	1.1216	0	0	0	0	0	0	0	0	0	0	0	0	3.53521	0	0	0	0	0	0	0	0	0	0
COA-PWY: coenzyme A biosynthesis I|g__Streptococcus.s__Streptococcus_tigurinus	0	0	0	0	0	3.58255	0	0	0	0	0	0	0	0	0	0	0	0	0	0	0	0	0	0	0	0	0	0	0	0	0	0	0	0	0	0	0	0	0	0	0	0	0	0	0	0	0
COA-PWY: coenzyme A biosynthesis I|g__Veillonella.s__Veillonella_atypica	78.9121	4.53037	31.2546	24.0744	109.662	36.682	8.12098	25.7772	14.8818	7.55859	6.71853	11.9145	29.1274	34.7384	35.5882	36.6094	4.55875	9.18028	19.7682	25.9761	13.6833	27.3756	26.4571	27.2901	31.5529	13.6368	0.790017	1.36815	5.78086	39.7911	0.612243	42.4561	35.1403	7.91441	7.39898	95.3152	0.350422	2.3313	32.9184	29.9357	6.39582	13.0528	72.0224	8.26759	20.8016	76.5832	30.5749
COA-PWY: coenzyme A biosynthesis I|g__Veillonella.s__Veillonella_dispar	10.1324	0	16.4523	23.2427	15.5897	43.1233	5.45117	12.8164	13.283	12.2695	2.05984	20.7685	9.32186	27.5689	10.7456	9.77701	3.35874	8.11745	6.11856	3.96132	32.8798	5.66185	10.5092	12.3341	15.3992	4.7813	0	3.33929	26.5065	48.1598	1.20377	13.9339	14.5002	2.70097	12.0704	15.7222	1.70982	2.37759	37.0544	33.9406	11.5741	7.1473	15.5293	12.9957	8.60298	46.0102	37.6456
COA-PWY: coenzyme A biosynthesis I|g__Veillonella.s__Veillonella_parvula	3.63733	17.5533	33.5995	19.044	4.63552	28.6065	9.63499	13.7436	13.481	21.2485	7.897	24.2587	13.0056	2.57495	29.7854	13.5174	33.7063	28.1222	19.0012	11.4024	1.095	6.81832	7.15491	16.4787	1.39555	4.62453	22.4416	6.04954	13.5925	19.7694	14.4026	17.5396	5.28442	12.3193	5.75051	29.3709	3.04951	8.09011	8.14812	9.07491	6.13381	7.92652	7.89717	29.7612	26.4617	40.3645	15.4464
COA-PWY: coenzyme A biosynthesis I|g__Veillonella.s__Veillonella_sp_6_1_27	0	0	0	0	0	0	0	0	0	0	0	0	0	0	0	0	0	0	0	0	0	0	0	0	0	0	0	0	0	0	0	0	0	8.86269	0	0	0	0	9.36197	0	0	0	0	0	0	0	0
COA-PWY: coenzyme A biosynthesis I|g__Veillonella.s__Veillonella_sp_HPA0037	0	0	0	0	0	0	0	0	0	0	0	0	0	0	0	0	0	0	0	0	0	0	0	0	0	0	0	0	0	0	0	80.7225	0	0	0	0	0	0	0	0	0	0	0	0	0	0	0
COA-PWY: coenzyme A biosynthesis I|g__Veillonella.s__Veillonella_sp_oral_taxon_158	0	0	0	0	0	0	0	0	0	0	0	0	0	0	0	0	0	0	0	0	0	0	0	0	0	0	0	0	0	0	0	0	0	0	0	0	0	0	0	0	0	19.8889	0	0	0	0	0
COA-PWY: coenzyme A biosynthesis I|unclassified	71.7876	109.746	162.91	69.5246	65.9605	38.3187	78.2327	148.454	179.253	53.4882	119.201	67.6637	54.4133	66.5535	35.8749	100.321	103.71	50.0219	58.7559	83.2322	98.7615	100.611	62.5826	180.625	131.325	146.983	60.7952	27.0739	93.8366	81.1702	47.4827	46.4701	85.8386	63.7391	110.035	79.9844	101.558	43.1449	69.579	53.4073	112.221	67.9807	45.6626	140.709	46.0125	108.252	52.6693
COBALSYN-PWY: adenosylcobalamin salvage from cobinamide I	245.137	157.947	138.421	188.973	157.457	112.929	130.377	135.659	186.337	91.1593	207.886	114.201	168.656	88.3491	93.9579	144.726	282.434	110.455	85.5382	116.946	54.9165	159.819	112.195	138.059	145.781	154.345	63.3351	86.4603	122.762	121.085	84.6188	170.648	172.321	97.7929	133.815	132.96	163.339	40.3908	88.5506	89.9901	239.255	120.004	116.799	154.881	107.293	149.3	116.165
COBALSYN-PWY: adenosylcobalamin salvage from cobinamide I|g__Escherichia.s__Escherichia_coli	1.39934	0	0	0	0	0	0	0	0	0	0	0	0	0	0	0.448235	0	0	0	0	0	0	0	0.429778	0	0	0	0	0	0	0	0	0	0	0	0	0	0	0	0	0	0	0	0	0	0	39.7208
COBALSYN-PWY: adenosylcobalamin salvage from cobinamide I|g__Fusobacterium.s__Fusobacterium_necrophorum	0	0	0	0	0	0	0	0	0	0	0	0	0	0	0	0	0	0	0	0	0	0	0	0	0	0	0	0	0	0	0	3.76414	0	0	0	0	0	0	0	0	0	0	0	0	0	0	0
COBALSYN-PWY: adenosylcobalamin salvage from cobinamide I|g__Leptotrichia.s__Leptotrichia_goodfellowii	0	0	0	0	0	0	0	0	0	0	0	0	0	0	0	0	0	0	0	0	0	0	0	0.968269	0	0	0	0	0	0	0	0	0	0	0	0	0	0	0	0	0	0	0	0	0	0	0
COBALSYN-PWY: adenosylcobalamin salvage from cobinamide I|g__Porphyromonas.s__Porphyromonas_sp_oral_taxon_279	0	65.2541	26.2517	15.9631	8.51891	0	40.5743	35.4504	31.2764	20.0707	61.8031	24.5943	0	18.0387	2.23405	0	132.27	41.2926	17.7662	24.5513	6.60088	9.74547	10.5005	2.22755	6.02679	23.0623	0	61.6275	61.3157	15.8011	41.7481	0	0.828224	44.5011	51.9529	4.13429	89.2075	17.9226	2.687	16.4637	144.47	41.7876	2.00748	26.462	7.26462	6.90273	2.32339
COBALSYN-PWY: adenosylcobalamin salvage from cobinamide I|g__Prevotella.s__Prevotella_loescheii	0	1.74662	0	0	0	0	0	0	0	0	0	0	0	0.801827	0	0	0	0	0	0	0	0	0	0.28012	0	0	0	0	0	0	0	0	0	0	0	0	0	0	0	0	0.947022	0	0	0	0	0	0
COBALSYN-PWY: adenosylcobalamin salvage from cobinamide I|g__Prevotella.s__Prevotella_marshii	0	0	0	0	0	0	0	0	0	0	0	0	0	0	0	0	0	0	0	0	0	0	0	0	0	0	0	0	0	0	0	0	0	0	0	0	0	0	0	0	0	1.16824	0	0	0	0	0
COBALSYN-PWY: adenosylcobalamin salvage from cobinamide I|g__Prevotella.s__Prevotella_salivae	99.129	2.20442	0	65.1061	29.6142	15.9319	12.6598	18.2273	12.4785	20.4183	16.2349	0	91.4322	8.37628	19.0756	14.282	8.06691	2.07131	4.56786	13.5236	8.068	37.3655	11.0011	14.8245	38.976	29.1476	0	0	0	21.2013	0	16.6371	19.6655	0.773668	31.3386	21.3948	0	0	10.8038	2.48159	1.18996	6.81813	3.56575	8.23086	16.0011	13.4587	4.81821
COBALSYN-PWY: adenosylcobalamin salvage from cobinamide I|g__Selenomonas.s__Selenomonas_flueggei	0	0	0	5.18732	0	0	0	0	0	0	0	0	0	0	0	0	0	0	0	1.71858	0	0	0	0.291909	0.664793	0	0	0	0	0	0	0	4.14961	0	0	0	0	0	0	0.397981	0	0	2.35493	0	0	0.726579	0
COBALSYN-PWY: adenosylcobalamin salvage from cobinamide I|unclassified	43.1831	35.9916	34.6197	27.3328	22.7449	0	26.1013	38.7154	46.0441	17.1421	19.0517	27.0668	6.73802	12.397	3.1949	38.8581	55.0346	8.97474	11.4614	19.1214	7.00626	46.626	19.7283	46.0259	39.1305	63.4069	0	0	17.0756	13.6914	10.3382	0	13.9391	11.0036	26.7647	0	23.5674	0	11.7358	7.92005	31.4924	18.4578	6.87379	65.809	9.78637	21.9866	0
COLANSYN-PWY: colanic acid building blocks biosynthesis	7.76856	0	0	0	0	0	0	0	0	0	0	7.69868	13.3707	0	0	3.29176	0	0	2.25268	0	3.52171	0	1.4164	2.95412	0	0	0	0	0	4.81103	13.3256	0	0	0	0	8.2772	0	0	3.26689	0	0	2.4496	0	0	7.17088	2.24331	69.2623
COLANSYN-PWY: colanic acid building blocks biosynthesis|g__Escherichia.s__Escherichia_coli	0	0	0	0	0	0	0	0	0	0	0	0	0	0	0	0.0850286	0	0	0	0	0	0	0	0.185103	0	0	0	0	0	0	0	0	0	0	0	0	0	0	0	0	0	0	0	0	0	0	21.7113
COLANSYN-PWY: colanic acid building blocks biosynthesis|unclassified	0	0	0	0	0	0	0	0	0	0	0	0	0	0	0	0	0	0	0	0	0	0	0	1.08384	0	0	0	0	0	0	0	0	0	0	0	0	0	0	0	0	0	0	0	0	0	0	0
COMPLETE-ARO-PWY: superpathway of aromatic amino acid biosynthesis	525.305	516.344	476.329	436.301	418.998	426.419	345.114	476.725	564.539	507.417	365.253	532.079	329.435	501.919	361.239	422.28	496.945	346.618	391.382	374.2	533.956	458.886	506.827	460.708	563.923	439.591	456.763	517.213	593.757	582.237	505.533	454.395	483.726	599.178	352.354	468.408	392.869	468.828	532.021	538.659	549.413	406.797	333.227	423.431	352.003	494.948	525.225
COMPLETE-ARO-PWY: superpathway of aromatic amino acid biosynthesis|g__Actinomyces.s__Actinomyces_sp_oral_taxon_448	0	0	0	0	0	0	0	0	0	0	0	0	0	0	1.59265	0	0	0	0	0	0	0	0	0	0	0	0	0	0	0	0	0	0	0	0	0	0	0	0	0	0	0	0	0	0	0	0
COMPLETE-ARO-PWY: superpathway of aromatic amino acid biosynthesis|g__Campylobacter.s__Campylobacter_gracilis	0	0	0	0	0	0	0	0	0	0	0	0	0	0	0	0	0	0	0	0	0	0	0	0.633444	0	0	0	0	0	0	0	0	0	0	0	0	0	0	0	0	0	0	0	0	0	0	0
COMPLETE-ARO-PWY: superpathway of aromatic amino acid biosynthesis|g__Campylobacter.s__Campylobacter_showae	0	5.47455	0	0	0	0	0	0	0	0	0	0	0	0	0	0	0	0	1.28178	2.14302	0	0	0	0.174895	0	0	0	0	0	0	0	0	0	0.625036	0	0	0.4702	0	0.356618	0	0	0	0	0	0	0	0
COMPLETE-ARO-PWY: superpathway of aromatic amino acid biosynthesis|g__Cardiobacterium.s__Cardiobacterium_hominis	0	0	0	0	0	0	0	0	0	0	0	0	0	0	0	0	0	0	0	0	0	0	0	0.410534	0	0	0	0	0	0	0	0	0	0	0	0	0.388588	0	0	0	0	0	0	0	0	0	0
COMPLETE-ARO-PWY: superpathway of aromatic amino acid biosynthesis|g__Corynebacterium.s__Corynebacterium_matruchotii	0	0	0	0	0	0	0	0	0	0	0	0	0	0	0	0	0	0	0	0	0	0	0	0.233442	0	0	0	0	2.40611	0	1.01128	0	0	0	0	0	0	0	0	0	0	5.33541	0	0	0	0	0
COMPLETE-ARO-PWY: superpathway of aromatic amino acid biosynthesis|g__Eikenella.s__Eikenella_corrodens	0	0	0	0	0	0	0	0	0	0	0	0	0	0	0	0	0	0	0	0	0	0	0	0.0533603	0	0	0	0	0	0	0	0	0	0	0	0	0	0	0	0	0	0	0	0	0	0	0
COMPLETE-ARO-PWY: superpathway of aromatic amino acid biosynthesis|g__Enhydrobacter.s__Enhydrobacter_aerosaccus	0	0	0	0	0	0	0	0	0	0	0	0	0	0	0	0	0	0	0	0	0	0	0	0.131659	0	0	0	0	0	0	0	0	0	0	0	0	0	0	0	0	0	0	0	0	0	0	0
COMPLETE-ARO-PWY: superpathway of aromatic amino acid biosynthesis|g__Escherichia.s__Escherichia_coli	0	0	0	0	0	0	0	0	0	0	0	0	0	0	0	1.05889	0	0	0	0	0	0	0	0.289355	0	0	0	0	0	0	0	0	0	0	0	0	0	0	0	0	0	0	0	0	0	0	36.098
COMPLETE-ARO-PWY: superpathway of aromatic amino acid biosynthesis|g__Haemophilus.s__Haemophilus_haemolyticus	0	0	0	0	0	0	0	0	0	0	0	0	0	0	0.413586	0	0	0	0	0	0	0	0	0	0	0	0	0	0	0	0	0	0	0	0	0	0	0	0	0	0	0	0	0	0	0	0
COMPLETE-ARO-PWY: superpathway of aromatic amino acid biosynthesis|g__Haemophilus.s__Haemophilus_influenzae	0	0	0	0	0	0	0	0	0	0	0	0	0	1.61889	0	4.53761	0	0	0	0	0	0	0	0	0	0	0	0	0	0	0	0	5.35605	0	0	0	0	0	0	0	0	0	0	0	0	0	0
COMPLETE-ARO-PWY: superpathway of aromatic amino acid biosynthesis|g__Haemophilus.s__Haemophilus_parahaemolyticus	0	0	0	0	0	0	0	0	0	0	0	0	0	0	0	0	0	0	0	0	0	0	0	0	0	0	0	0	0	0	0	0	0	1.12015	0	0	0	0	0	0	0	0	0	0	0	0	0
COMPLETE-ARO-PWY: superpathway of aromatic amino acid biosynthesis|g__Haemophilus.s__Haemophilus_parainfluenzae	3.27894	17.8548	38.2879	16.0457	4.6165	16.4842	16.8512	10.6727	12.8983	8.82609	9.98602	14.4271	5.01927	53.1992	12.4122	4.50907	8.28994	16.9741	20.2794	20.6629	17.7295	7.88119	12.9278	16.6528	17.6404	7.69834	8.26634	49.2448	84.3996	75.6218	65.6694	0	16.5811	95.37	8.05513	9.6071	32.8154	53.1138	47.3861	15.6794	64.9115	5.04221	2.88712	16.1104	11.4775	4.94716	17.9815
COMPLETE-ARO-PWY: superpathway of aromatic amino acid biosynthesis|g__Haemophilus.s__Haemophilus_sputorum	0	0	0	0	0	0	0	0	0	0	0	1.59156	0	0	0	0	0	0	0	0	0	0	0	0.143069	0	0	0	0	0	0	3.35663	0	0	0	0	0	0.892809	0	1.48518	0	0	0	0	0	0	0	0
COMPLETE-ARO-PWY: superpathway of aromatic amino acid biosynthesis|g__Kingella.s__Kingella_denitrificans	0	0	0	0	0	0	0	0	0	0	0	0	0	0	0	0	0	0	0	0	0	0	0.856827	0	0	0	0	0	0	0	0	0	0	0	0	0	0	0	0	0	0	0	0	0	0	0	0
COMPLETE-ARO-PWY: superpathway of aromatic amino acid biosynthesis|g__Kingella.s__Kingella_oralis	0	0	0	0	0	0	0	0	0	0	0	0	0	0	0	0	0	0	0	0	0	0	0	0	0	0	0	0	0	0	0	0	0	0.859736	0	0	0	0	0	0	0	0	0	0	0	0	0
COMPLETE-ARO-PWY: superpathway of aromatic amino acid biosynthesis|g__Lachnospiraceae_noname.s__Lachnospiraceae_bacterium_ICM7	0	0	7.72698	0	0	0	0	0	0	0	0	0	0	0	0	0	0	0	0	0	0	0	0	0.444061	0	0	0	0	4.05249	0	0	0	0	1.28071	0	0	2.35387	0	0	0	2.65045	0	0	0	0	0	0
COMPLETE-ARO-PWY: superpathway of aromatic amino acid biosynthesis|g__Leptotrichia.s__Leptotrichia_buccalis	0	0	0	0	0	0	0	0	0	0	0	0	0	0	0	0	0	0	0	0	0	0	0	0.394533	0	0	0	0	0	0	0	0	0	0	0	0	0	0	0	0	0	0	0	0	0	0	0
COMPLETE-ARO-PWY: superpathway of aromatic amino acid biosynthesis|g__Leptotrichia.s__Leptotrichia_goodfellowii	0	0	0	0	0	0	0	0	0	0	0	0	0	0	0	0	0	0	0	0	0	0	0	0.638775	0	0	0	0	0	0	0	0	0	0	0	0	0	0	0	0	0	0	0	0	0	0	0
COMPLETE-ARO-PWY: superpathway of aromatic amino acid biosynthesis|g__Leptotrichia.s__Leptotrichia_wadei	0	0	0	0	0	0	0	0	0	0	0	0	0	0	0	0	0	0	0	0	0	0	0	0.654615	0	0	0	0	0	0	0	0	0	0	0	0	0	0	0	0	0	0	0	0	0	0	0
COMPLETE-ARO-PWY: superpathway of aromatic amino acid biosynthesis|g__Neisseria.s__Neisseria_elongata	0	0	0	0	0	0	0	0	0	0	0	0	0	0	0	0	0	0	0	0	2.18997	0	0	0.643782	0	0	0	0	0	0	0	0	0	2.00087	0	0	0.324168	5.66202	1.96778	0	0	0	0	0	0	0	0
COMPLETE-ARO-PWY: superpathway of aromatic amino acid biosynthesis|g__Neisseria.s__Neisseria_flavescens	0	0	0	2.8258	2.62868	0	1.61677	0	0	0	3.6325	4.01086	0	11.0791	0	0	0	0	2.55543	7.31643	0	0	2.93376	2.82447	0	7.49982	4.30339	26.1905	4.5387	3.60453	21.6725	0	3.42944	17.535	0	0	6.39512	58.243	3.55511	8.91147	22.2402	3.28938	0	2.40827	0	0	1.35363
COMPLETE-ARO-PWY: superpathway of aromatic amino acid biosynthesis|g__Neisseria.s__Neisseria_macacae	0	0	0	0	0	0	0	0	0	0	0	1.80562	0	0	0	0	0	2.06085	1.90621	0	0	0	0	0	0	0	3.14562	0	0	0	2.64238	0	0	0	0	0	0	0	0	0	0	2.82284	0	1.52546	0	0	0
COMPLETE-ARO-PWY: superpathway of aromatic amino acid biosynthesis|g__Neisseria.s__Neisseria_sicca	0	0	0	0	0	6.57543	0	0	0	0	1.69164	13.7396	0	0	1.9923	0	1.48367	6.30456	3.37523	4.94147	0	3.97404	6.05582	2.88345	0	0	11.4933	36.8234	0	0	3.30025	0	0	17.1607	0	3.26078	4.34739	0	0.722998	20.308	0	5.60534	0	2.52625	2.44732	0	0
COMPLETE-ARO-PWY: superpathway of aromatic amino acid biosynthesis|g__Neisseria.s__Neisseria_sp_oral_taxon_014	0	0	0	0	0	0	0	0	0	0	0	0	0	0	0	0	0	0	0	0	0	0	0	0	0	0	0	0	0	0	0	0	0	0	0	0	0	0	0	0	1.9698	0	0	0	0	0	0
COMPLETE-ARO-PWY: superpathway of aromatic amino acid biosynthesis|g__Neisseria.s__Neisseria_subflava	0	8.95123	0	0	0	0	1.16656	0	0	0	2.0149	3.21071	0	8.31706	0	0	0.948486	0	2.18552	4.48113	0	0	0	3.97569	0	0	0	20.9171	2.91193	10.7656	12.299	0	6.94356	18.3872	0	0	0	50.2809	2.62928	6.01565	19.7975	0	0	0	0	0	0
COMPLETE-ARO-PWY: superpathway of aromatic amino acid biosynthesis|g__Propionibacterium.s__Propionibacterium_propionicum	0	0	0	0	0	0	0	0	0	0	0	0	0	0	0	0	0	0	0	0	0	0	0	0.453985	0	0	0	0	0	0	0	0	0	0	0	0	0	0	0	0	0.54038	0	0	0	0	0	0
COMPLETE-ARO-PWY: superpathway of aromatic amino acid biosynthesis|g__Selenomonas.s__Selenomonas_flueggei	0	0	0	2.74988	0	0	0	0	0	0	0	0	0	0	0	0	0	0	0	0	0	0	0	0.137264	0	0	0	0	0	0	0	0	10.5448	0	0	0	0	0	0	0	0	0	0	0	0	0	0
COMPLETE-ARO-PWY: superpathway of aromatic amino acid biosynthesis|g__Selenomonas.s__Selenomonas_noxia	0	3.97459	0	5.30463	0	0	0	0	0	0	0	0	0	0	0	0	4.81553	0	2.3823	0	0	0	0	2.5997	0	0	0	0	0	0.703477	0	0	0	0	0	0	0	0	1.16788	1.49956	0	2.75048	11.3801	0	0	4.06581	4.51957
COMPLETE-ARO-PWY: superpathway of aromatic amino acid biosynthesis|g__Selenomonas.s__Selenomonas_sputigena	0	0	0	0	0	0	0	0	0	0	0	0	0	0	0	0	0	0	0	0	0	0	2.21827	0	0	0	0	0	0	0	0	0	0	0	0	0	0	0	0	0	0	0	0	0	1.5582	0	0
COMPLETE-ARO-PWY: superpathway of aromatic amino acid biosynthesis|g__Streptococcus.s__Streptococcus_australis	0	7.75299	8.77377	0	0	0	2.83882	0	0	0	0	0	0	0	0	0	0	0	0	0	0	0	0	0.55069	0	0	0	5.39841	0	2.8295	0	0	0	10.1196	0	0	8.2469	0	0	0	6.50635	2.50549	0	0	0	0	0
COMPLETE-ARO-PWY: superpathway of aromatic amino acid biosynthesis|g__Streptococcus.s__Streptococcus_cristatus	0	0	0	0	0	0	0	0	0	0	0	0	0	0	0	0	0	0	1.4454	0	0	0	1.19969	0	0	0	10.6776	0	0	0	1.65461	0	0	0	0	0	0	0	0	1.79485	0	2.41285	0	0	0	1.76596	0
COMPLETE-ARO-PWY: superpathway of aromatic amino acid biosynthesis|g__Streptococcus.s__Streptococcus_gordonii	0	0	0	0	1.04369	0	0	0	0	0	0	0	0	0	0	0	1.26718	4.18581	0	0	0	0	0	0	0	0	3.23106	0	0	0	0	0	0	0	0	0	0	0	0	0	0	2.31377	0	0	0	0	0
COMPLETE-ARO-PWY: superpathway of aromatic amino acid biosynthesis|g__Streptococcus.s__Streptococcus_oligofermentans	0	0	0	0	0	0	0	0	0	0	0	0	0	0	0	0	0	0	0	0	0	0	0	0	0	0	0	0	0	0	0	0	0	0	0	0	0	0	0	0	0	1.39595	0	0	0	0	0
COMPLETE-ARO-PWY: superpathway of aromatic amino acid biosynthesis|g__Streptococcus.s__Streptococcus_parasanguinis	24.2801	3.4926	0	1.42374	3.32911	16.6775	3.5758	0	6.08306	3.91311	0	10.4868	7.64391	21.7815	6.66877	9.21386	2.37713	0	3.91414	2.45447	31.9317	2.19665	40.8631	4.68827	5.4944	2.74806	17.0783	4.09062	13.3796	33.5212	0	17.6434	6.56157	8.04784	0	17.0116	1.04112	10.2846	10.9209	9.94445	9.39786	12.3595	3.89149	1.41335	3.08078	9.34433	14.3315
COMPLETE-ARO-PWY: superpathway of aromatic amino acid biosynthesis|g__Streptococcus.s__Streptococcus_salivarius	0	0	0	0	0	0	3.24609	0	1.39345	0	0	0	0	6.79893	1.28124	0	0	0	2.68544	0	0	1.03195	0	1.32946	0	0	0	0	0	0	0	31.6206	5.04652	3.39538	0	8.68638	0	0	3.26087	1.58383	0	0	0	2.18285	0	0	0
COMPLETE-ARO-PWY: superpathway of aromatic amino acid biosynthesis|g__Streptococcus.s__Streptococcus_sanguinis	5.08812	5.683	23.8775	0	0	26.6087	17.8086	0	3.8534	8.52855	11.2946	23.8438	4.34321	3.47197	7.03501	5.25906	4.77322	22.4128	14.7934	6.45642	5.15756	10.7968	20.6726	5.04742	1.79668	4.11369	36.0365	20.4546	9.3821	10.9192	25.9493	2.52216	18.4813	31.772	0	4.81769	20.8437	5.87747	6.14934	29.1613	11.462	0	13.0391	7.26865	18.722	4.98661	0
COMPLETE-ARO-PWY: superpathway of aromatic amino acid biosynthesis|g__Streptococcus.s__Streptococcus_vestibularis	0	0	0	0	0	0	0	0	0	0	0	0	0	0	0	0	0	0	0	0	0	0	0	0	0	0	0	0	0	2.67917	0	0	0	0	0	0	0	1.69443	0	0	0	0	0	0	0	0	0
COMPLETE-ARO-PWY: superpathway of aromatic amino acid biosynthesis|unclassified	69.9529	77.5484	70.5178	45.6415	36.7695	0	50.8392	72.1023	101.648	30.1752	94.4127	49.3062	22.2726	37.4558	20.3038	85.7338	85.1901	36.1535	31.3356	59.5502	53.4615	94.8497	32.9849	106.847	75.6221	97.3949	9.90197	27.5422	39.1824	43.2736	34.0963	31.2499	60.2506	37.411	68.2592	20.7664	66.6441	40.2482	35.1247	31.4779	73.2078	43.3515	14.6989	93.337	31.5497	55.2254	0
DAPLYSINESYN-PWY: L-lysine biosynthesis I	28.5198	131.255	142.256	85.6575	74.3133	178.962	86.8866	92.6102	74.5968	57.2418	74.4133	261.669	77.3081	251.883	96.0641	116.851	86.417	133.687	144.561	155.189	202.427	74.5711	214.226	177.417	97.5813	67.1827	239.248	338.222	285.466	275.09	314.277	84.1213	186.449	392.99	65.5415	97.2445	181.261	319.686	258.27	232.249	295.396	98.1967	80.7445	117.863	87.6329	48.9498	141.257
DAPLYSINESYN-PWY: L-lysine biosynthesis I|g__Acidovorax.s__Acidovorax_ebreus	0	0	0	0	0	0	0	0	0	0	0	0	0	0	0	0	0	0	0	0	0	0	0	0.471261	0	0	0	0	0	0	0	0	0	0	0	0	0	0	0	0	0	0	0	0	0	0	0
DAPLYSINESYN-PWY: L-lysine biosynthesis I|g__Actinomyces.s__Actinomyces_massiliensis	0	0	0	0	0	0	0	0	0	0	0	0	0	0	0	0	0	0	0	0	0	0	0	0.235208	0	0	0	0	0	0.416029	0	0	0	0	0	0	0	0	0	0	0	0	0	0	0	0	0
DAPLYSINESYN-PWY: L-lysine biosynthesis I|g__Actinomyces.s__Actinomyces_odontolyticus	0	2.26346	5.41872	3.89051	8.28261	4.0529	3.14129	2.43861	4.5695	4.08637	3.68717	5.69738	0	5.00431	0.318589	5.31248	3.97163	4.6176	1.55632	0	5.57896	2.52577	0	1.0457	12.0521	0	0	0	15.5481	13.69	7.39189	0	3.58092	4.88143	6.7882	0	5.76652	19.9444	5.87125	3.58806	7.26426	2.13105	2.16089	6.60493	2.48116	3.2867	7.39059
DAPLYSINESYN-PWY: L-lysine biosynthesis I|g__Actinomyces.s__Actinomyces_sp_HPA0247	0	0	0	0	0	0	0	0	0	0	0	0	0	0	1.59142	22.9018	0	0	0	0	0	0	0	1.77369	0	0	0	0	0	0	0	0	0	0	0	0	0	0	6.95245	12.9088	0	0	0	0	0	0	0
DAPLYSINESYN-PWY: L-lysine biosynthesis I|g__Actinomyces.s__Actinomyces_sp_ICM39	0	10.8173	0	0	0	0	0	0	0	0	0	0	0	0	0	0	0	0	0	0	0	0	0	3.62584	0	0	0	0	0	0	0	0	0	0	0	0	0	0	0	0	0	0	0	0	0	0	0
DAPLYSINESYN-PWY: L-lysine biosynthesis I|g__Actinomyces.s__Actinomyces_sp_ICM47	0	0	0	0	0	0	0	0	0	0	0	0	0	0	6.18079	0	0	0	0	0	0	0	0	12.0685	0	0	0	0	0	0	0	0	0	0	0	0	0	0	3.65733	0	0	0	0	0	0	0	0
DAPLYSINESYN-PWY: L-lysine biosynthesis I|g__Actinomyces.s__Actinomyces_sp_oral_taxon_172	0	0	0	0	0	0	0	0	0	0	0	0	0	0	0	0	0	0	0	0	0	0	0	7.81476	0	0	0	0	0	0	0	0	0	0	0	0	0	0	0	0	0	0	0	0	0	0	0
DAPLYSINESYN-PWY: L-lysine biosynthesis I|g__Actinomyces.s__Actinomyces_sp_oral_taxon_448	0	0	0	0	0	0	0	0	0	0	0	0	0	0	2.02963	0	0	0	0	0	0	0	0	0.108075	0	0	0	0	0	0	0	0	0	0	0	0	0	0	0	0	0	0	0	0	0	0	0
DAPLYSINESYN-PWY: L-lysine biosynthesis I|g__Actinomyces.s__Actinomyces_viscosus	0	1.40039	0	0	0	0	0	0	0	0	0	0	0	0	0.585796	0	0	0	0	0	0.624234	0	0	0.592031	0	0	2.59074	4.62844	1.92753	0.90771	0	0	0	0.723862	0	0	0	0	0.56541	0	0	0	0	0	0	0	0
DAPLYSINESYN-PWY: L-lysine biosynthesis I|g__Atopobium.s__Atopobium_sp_ICM58	0	0	0	0	0	0	0	0	0	0	0	0	0	0	0	0	0	0	0	0	0	0	4.52029	0	0	0	0	0	0	0	0	0	0	0	0	0	0	0	0	0	0	0	0	0	0	0	0
DAPLYSINESYN-PWY: L-lysine biosynthesis I|g__Campylobacter.s__Campylobacter_gracilis	0	0	0	0	0	0	0	0	0	0	0	0	0	0	0	0	0	0	0	0	0	0	0	0.168403	0	0	0	0	0	0	0	0	0	0	0	0	0	0	0	0	0	0	0	0	0	0	0
DAPLYSINESYN-PWY: L-lysine biosynthesis I|g__Cardiobacterium.s__Cardiobacterium_hominis	0	0	0	0	0	0	0	0	0	0	0	0	0	0	0	0	0	0	0	0	0	0	0	0.401484	0	0	0	0	0	0.365428	0	0	0	0	0	0	0	0	0	0	0	0	0	0	0	0	0
DAPLYSINESYN-PWY: L-lysine biosynthesis I|g__Corynebacterium.s__Corynebacterium_matruchotii	0	0	0	0	0	0	0	0	0	0	0	1.06248	0	0	0	0	0	0	0	0	0	0	0.663374	0.19724	0	0	0	0	1.27429	0.401325	0.818803	0	0	0.263818	0	0	0	0	0	0	0	3.66201	0	0	0	0	0
DAPLYSINESYN-PWY: L-lysine biosynthesis I|g__Enhydrobacter.s__Enhydrobacter_aerosaccus	0	0	0	0	0	0	0	0	0	0	0	0	0	0	0	0	0	0	0	0	0	0	0	0.0382596	0	0	0	0	0	0	0	0	0	0	0	0	0	0	0	0	0	0	0	0	0	0	0
DAPLYSINESYN-PWY: L-lysine biosynthesis I|g__Escherichia.s__Escherichia_coli	0	0	0	0	0	0	0	0	0	0	0	0	0	0	0	0.322231	0	0	0	0	0	0	0	0.253126	0	0	0	0	0	0	0	0	0	0	0	0	0	0	0	0	0	0	0	0	0	0	19.3838
DAPLYSINESYN-PWY: L-lysine biosynthesis I|g__Haemophilus.s__Haemophilus_haemolyticus	0	0	0	0	0	0	0	0	0	0	0	0	0	0	0.57789	0	0	0	0	0	0.918702	0	0	0	0	0	0	0	0	0	0	0	1.38479	0	0	0	0	0	0	0	0.622478	0	0	0	0	0	0
DAPLYSINESYN-PWY: L-lysine biosynthesis I|g__Haemophilus.s__Haemophilus_influenzae	0	0	0	0	0	0	0	0	0	0	0	0	0	1.73728	0	2.92779	0	0	0	0	0	0	0	0	0	0	0	0	0	0	0	0	3.85884	0	0	0	0	0	0	0	0	0	0	0	0	0	0
DAPLYSINESYN-PWY: L-lysine biosynthesis I|g__Haemophilus.s__Haemophilus_parahaemolyticus	0	0	0	0	0	0	0	0	0	0	0	0	0	0	0	0	0	0	0	0	0	0	0	0	0	0	0	0	0	0	0	0	0	0.889601	0	0	0	0	0	0	0	0	0	0	0	0	0
DAPLYSINESYN-PWY: L-lysine biosynthesis I|g__Haemophilus.s__Haemophilus_parainfluenzae	0	16.8845	35.5494	13.0769	4.31151	20.7805	13.3043	11.03	16.634	6.74479	7.67829	15.0771	6.29771	50.2221	13.3306	3.08642	9.7816	16.1221	17.5563	23.3868	20.6501	6.74134	17.8348	15.829	15.3904	8.6507	8.72371	47.2971	87.1078	72.335	63.2259	0	11.7362	104.426	7.11959	8.19066	33.8646	42.4475	44.2924	16.2731	64.7679	7.46645	2.68288	17.8999	14.3379	3.44785	16.5928
DAPLYSINESYN-PWY: L-lysine biosynthesis I|g__Haemophilus.s__Haemophilus_paraphrohaemolyticus	0	0	0	0	0	0	0	0	0	0	0	0	0	0	0	0	0	0	0	0	3.48833	0	0	0	0	0	0	0	0	0	0	0	0	0	0	0	1.06634	0	0	0	0	0	0	0	0	0	0
DAPLYSINESYN-PWY: L-lysine biosynthesis I|g__Haemophilus.s__Haemophilus_pittmaniae	0	0	0	0	0	0	0	0	0	0	0	0	0	0	0	0	0	0	0	0	0	0	0	0	0	0	0	0	0	0	0	0	0	0	0	0	0	0	0	0	0	0	0	2.3681	0	0	0
DAPLYSINESYN-PWY: L-lysine biosynthesis I|g__Haemophilus.s__Haemophilus_sputorum	0	0	0	0	0	0	0	0	0	0	0	0	0	0	0	0	0	0	0	0.914361	0	0	0	0.178299	0	0	0	1.87501	0	0	2.90038	0	0	0	0	0	1.27461	0	1.31232	0.580062	0	0	0	0	0	0	0
DAPLYSINESYN-PWY: L-lysine biosynthesis I|g__Kingella.s__Kingella_denitrificans	0	0	0	0	0	0	0	0	0	0	0	0	0	0	0	0	0	0	0	0	1.71053	0	0	0	0	0	0	0	0	0	0	0	0	0	0	0	0	0	0	0	0	0	0	0	0	0	0
DAPLYSINESYN-PWY: L-lysine biosynthesis I|g__Kingella.s__Kingella_oralis	0	0	0	0	0	0	0	0	0	0	0	0	0	0	0	0	0	0	0	0	0	0	0	0	0	0	0	0	0	0	0	0	0	0	0	0	0	0	0.647844	0	0	0	0	0	0	0	0
DAPLYSINESYN-PWY: L-lysine biosynthesis I|g__Lautropia.s__Lautropia_mirabilis	0	0	0	0	0	0	0	1.13635	0	0	0	4.34646	0	0	0.240011	0	0	3.6379	0	0	2.13515	0	3.11535	0.215861	0	0	0	5.3112	4.19244	2.64062	14.3999	3.83707	1.51176	5.80756	0	0	1.9467	7.36871	9.84136	6.39574	2.05414	0	0	0	0	0	0
DAPLYSINESYN-PWY: L-lysine biosynthesis I|g__Neisseria.s__Neisseria_cinerea	0	0	0	0	0	0	0	0	0	0	0	0	0	0	0	0	0	0	0	0	0.518658	0	0	0	0	0	0	0	0	0	0	0	0	0	0	0	0	0	0	0	0	0	0	0	0	0	0
DAPLYSINESYN-PWY: L-lysine biosynthesis I|g__Neisseria.s__Neisseria_elongata	0	0	0	0	0	0	0	0	0	0	0	0	0	0	0	0	0	0	0	0	0.902869	0	0	0.316174	0	0	0	0	0	0	0.494011	0	0	1.33919	0	0	0.302865	1.9039	1.60724	0.440392	0	0	0	0	0	0	0
DAPLYSINESYN-PWY: L-lysine biosynthesis I|g__Neisseria.s__Neisseria_flavescens	0	5.15269	0.881964	1.90398	1.75717	0	1.32222	2.15954	0	0	2.3524	6.90994	0	9.90159	0.519823	0	0.90202	2.50474	3.81601	5.79496	0	0	1.68248	3.37517	0	7.68448	2.31212	28.0386	4.30341	4.50711	22.4488	0	4.25774	16.3243	0	0	5.80237	49.6471	2.63887	10.7775	23.4607	5.28629	0	2.94118	0	0	0
DAPLYSINESYN-PWY: L-lysine biosynthesis I|g__Neisseria.s__Neisseria_macacae	0	0	0	0	0	0	0	0	0	0	0	3.45409	0	0	0	0	0	0	0	1.63213	0.774794	0	0	0.136599	0	0	0	0	0	0	0	0	0	0	0	0	1.11921	0	0	2.96652	0	0	0	0	0	0	0
DAPLYSINESYN-PWY: L-lysine biosynthesis I|g__Neisseria.s__Neisseria_meningitidis	0	0	0	0	0	0	0	0	0	0	0	0	0	0	0	0	0	0	0	0	0	0	0	0	0	0	0	0	0	0	0	0	0	0	0	0	0	0	0	2.48237	0	0	0	0	0	0	0
DAPLYSINESYN-PWY: L-lysine biosynthesis I|g__Neisseria.s__Neisseria_sicca	0	0	0	0	0	0	0	0	0	0	0	3.97852	0	0	0.737477	0	0	0	2.51892	2.20787	1.55837	1.46552	3.1545	1.55438	0	0	5.74852	22.7056	0	0	2.77976	0	0	7.1572	0.91434	3.51282	1.14239	3.26994	0	8.25045	0	2.91993	0	1.48592	1.55611	0	0
DAPLYSINESYN-PWY: L-lysine biosynthesis I|g__Neisseria.s__Neisseria_sp_oral_taxon_014	0	0	0	0	0	0	0	0	0	0	0	0	0	0	0	0	0	0	0	0	0	0	0	0	0	0	0	0	0	0	0	0	0	0	0	0	0	0	0	0	2.97367	0	0	0	0	0	0
DAPLYSINESYN-PWY: L-lysine biosynthesis I|g__Neisseria.s__Neisseria_subflava	0	10.7789	0	0	0	0	0	0	0	0	1.25848	3.63678	0	10.0034	0	0	0.92671	0	2.60078	4.1351	0	0	0	3.26169	0	0	2.17135	23.303	5.45384	13.0173	17.5226	0	6.77273	22.3637	0	0	0	48.9454	4.07024	5.24145	19.5345	0	0	2.15463	0	0	0
DAPLYSINESYN-PWY: L-lysine biosynthesis I|g__Propionibacterium.s__Propionibacterium_acnes	0	0	0	0	0	0	0	0	0	0	0	0	0	0	0	0	0	0	0	0	0	0	0	0.0978093	0	0	0	0	0	0	0	0	0	0	0	0	0	0	0	0	0	0	0	0	0	0	0
DAPLYSINESYN-PWY: L-lysine biosynthesis I|g__Propionibacterium.s__Propionibacterium_propionicum	0	0	0	0	0	0	0	0	0	0	0	0	0	0	0	0	0	0	0	0	0.661919	0	1.05376	0.512334	0	0	0	0	0	0	0	0	0	0	0	0	0	0	0	0	1.37706	0	0	0	0	0	0
DAPLYSINESYN-PWY: L-lysine biosynthesis I|g__Rothia.s__Rothia_dentocariosa	0	0	0	0	0	5.07983	0	0	0	0	0	0	0	0	0	0.646225	0	0	0	0.985111	1.64815	0	4.61054	0.121583	0	0	15.2423	1.62054	0	1.47214	0	4.1879	3.91905	11.1176	0	0	3.84419	0	7.94795	1.77247	0.957029	0	0	0	0	0	0
DAPLYSINESYN-PWY: L-lysine biosynthesis I|unclassified	0	0	7.68482	14.4132	0	0	11.4761	0	11.9439	0	0	25.5109	11.5946	0	0	16.1586	0	6.99422	3.17531	6.81267	9.25651	13.1501	11.7338	11.6756	0	0	0	26.3062	16.4507	16.1173	9.98356	0	16.8978	7.5025	17.0857	0	14.776	13.6869	7.62174	5.54306	10.8006	0	0	13.0264	0	0	0
DENITRIFICATION-PWY: nitrate reduction I (denitrification)	0	5.62028	1.80606	1.24728	0	0	5.66266	0	0	0	1.81873	5.69504	0	3.7879	2.12881	0	3.62272	5.23933	3.27083	6.22079	9.20594	4.75363	1.74115	4.61032	0	0.620315	3.43174	4.82719	1.65228	0	2.25861	3.9146	2.8762	5.13644	1.32165	0	3.01062	0	3.56636	0.706949	0.329673	0	0	2.34754	0	0	3.11845
DENITRIFICATION-PWY: nitrate reduction I (denitrification)|unclassified	0	0	0	0	0	0	0	0	0	0	0	0	0	0	0	0	0	0	0	0	0	0	0	0.813057	0	0	0	0	0	0	0	0	0	0	0	0	0	0	0	0	0	0	0	0	0	0	0
DENOVOPURINE2-PWY: superpathway of purine nucleotides de novo biosynthesis II	276.609	344.108	352.98	294.326	286.248	210.223	270.961	324.212	326.881	224.656	316.959	385.494	221.447	352.715	228.279	351.992	320.051	261.218	251.779	280.524	373.093	308.773	353.591	427.278	312.063	287.786	313.851	374.083	384.631	392.383	380.404	345.202	384.844	451.866	262.938	261.693	321.453	394.311	337.952	393.466	374.882	309.459	218.102	323.007	246.263	323.211	157.55
DENOVOPURINE2-PWY: superpathway of purine nucleotides de novo biosynthesis II|g__Haemophilus.s__Haemophilus_influenzae	0	0	0	0	0	0	0	0	0	0	0	0	0	2.50264	0.411219	0.982318	0	0	0	0	0	0	0	0	0	0	0	0	0	0	0	0	3.94221	0	0	0	0	0	0	0	0	0	0	0	0	0	0
DENOVOPURINE2-PWY: superpathway of purine nucleotides de novo biosynthesis II|g__Haemophilus.s__Haemophilus_parainfluenzae	0	13.5612	31.018	14.5351	5.43924	13.0648	9.70021	7.85945	7.51437	6.99146	6.50915	7.92878	0	42.7787	10.2996	3.27893	6.96644	13.1197	11.9874	15.8249	14.6597	4.57144	11.5037	12.6862	10.3557	6.60593	6.60342	37.3919	73.6853	64.0695	54.5824	1.1259	15.2517	77.8023	6.36214	7.21852	25.9244	42.8708	32.2163	18.177	43.8076	5.72391	0	13.2362	9.04734	0	13.1919
DENOVOPURINE2-PWY: superpathway of purine nucleotides de novo biosynthesis II|unclassified	0	47.9116	27.1665	25.2474	0	0	23.5171	29.1177	42.8722	18.9317	28.1618	43.999	0	21.4312	17.8764	35.9516	24.1976	25.2604	8.20695	35.683	32.6148	38.0631	25.4368	52.458	6.9029	56.3906	15.1386	28.6095	26.5423	32.226	13.0795	9.90697	33.997	27.8225	32.6367	21.4231	63.0596	0	25.4406	27.9094	38.8209	18.5958	0	0	20.4847	39.9765	0
DTDPRHAMSYN-PWY: dTDP-L-rhamnose biosynthesis I	590.28	460.882	232.744	450.122	565.53	324.049	300.072	472.196	415.959	687.596	232.868	398.073	375.847	334.646	457.382	406.566	436.179	230.548	312.973	303.71	389.825	388.959	306.522	393.091	542.874	482.577	246.458	363.032	411.556	328.737	284.018	333.046	324.116	363.093	323.607	558.973	318.41	344.576	318.917	311.637	382.961	285.299	190.599	297.207	328.918	351.638	478.899
DTDPRHAMSYN-PWY: dTDP-L-rhamnose biosynthesis I|g__Acidovorax.s__Acidovorax_ebreus	0	0	0	0	0	0	0	0	0	0	0	0	0	0	0	0	0	0	0	0	0	0	0	0.401714	0	0	0	0	0	0	0	0	0	0	0	0	0	0	0	0	0	0	0	0	0	0	0
DTDPRHAMSYN-PWY: dTDP-L-rhamnose biosynthesis I|g__Actinomyces.s__Actinomyces_georgiae	0	0	0	0	0	0	0	0	0	0	0	0	0	0	0	0	0	0	0	0	0	0	0.576899	1.23898	0	0	0	0	0	0	0	0	0	1.00891	0	0	0	0	0	0.607994	0	0	0	0	0	0	0
DTDPRHAMSYN-PWY: dTDP-L-rhamnose biosynthesis I|g__Actinomyces.s__Actinomyces_sp_oral_taxon_448	0	0	0	0	0	0	0	0	0	0	0	0	0	0	3.60928	0	0	0	0	0	0	0	0	0.20095	0	0	0	0	0	0	0	0	0	0	0	0	0	0	0	0	0	0	0	0	0	0	0
DTDPRHAMSYN-PWY: dTDP-L-rhamnose biosynthesis I|g__Alloprevotella.s__Alloprevotella_tannerae	0	0.892441	4.03594	0	0	0	14.272	2.87658	0	0	9.69753	3.69305	3.2514	3.6126	1.38429	0.531676	0.921455	2.08422	5.9753	0	0	6.84204	0	0.269589	0	67.9825	0	1.4445	0	0.360204	0	0	1.42257	0.587031	6.42451	4.42329	0.185868	1.44749	0	0	0.655047	7.54902	0	6.71659	6.86175	0	0
DTDPRHAMSYN-PWY: dTDP-L-rhamnose biosynthesis I|g__Atopobium.s__Atopobium_parvulum	16.0163	10.4874	3.7491	10.2154	16.1092	3.34832	22.9123	25.1596	11.9842	8.46074	4.74564	14.6916	11.4747	6.73214	18.22	30.9157	10.9079	7.66154	5.36513	4.70051	21.7401	10.2264	6.14117	32.5988	27.7816	11.6757	4.25076	3.02415	4.89741	6.77823	0	13.0966	12.3956	2.18389	6.42433	50.3877	0.750398	3.59204	10.3258	3.74725	3.12669	14.2388	2.92842	11.9743	16.5939	19.1054	15.8901
DTDPRHAMSYN-PWY: dTDP-L-rhamnose biosynthesis I|g__Atopobium.s__Atopobium_rimae	0	7.0256	1.7566	1.15295	0	0	4.84183	0	0	1.91241	1.93779	13.7269	5.79401	0	5.14855	0	0	3.24757	0	0	0	1.78422	1.82185	5.10854	0	1.75317	0	0	2.23662	4.73674	0	0	0	0.730918	0	8.60075	0	1.2838	0.767186	0	0	1.4282	0	9.45241	12.7758	3.62539	0
DTDPRHAMSYN-PWY: dTDP-L-rhamnose biosynthesis I|g__Bifidobacterium.s__Bifidobacterium_dentium	0	0	0	0	0	0	0	0	0	0	0	0	0	0	0	0	0	0	0	0	0	0	0	0	0	0	0	0	0	0	0	0	0	0	0	0	0	0	0	0	0	0	0	0.579266	0	0	0
DTDPRHAMSYN-PWY: dTDP-L-rhamnose biosynthesis I|g__Capnocytophaga.s__Capnocytophaga_gingivalis	0	1.74714	1.29692	0	0	0	0	0	0	0	0	2.14764	0	0	0	0	0	1.02404	0	1.54941	1.0488	0	0	1.04642	0	0	1.13589	0	0	0	0	0	0	1.84788	0	0	0.422876	1.86549	1.00363	0.448119	0	0	0	0	0	0	0
DTDPRHAMSYN-PWY: dTDP-L-rhamnose biosynthesis I|g__Capnocytophaga.s__Capnocytophaga_granulosa	0	0	0	0	0	0	0	0	0	0	0	0	0	1.40185	0	0	0	0	0	0.801518	0	0	0	0.285156	0	0	0	0	0	0	0	1.7262	0	0	0	0	0	0	0	0	0	1.57653	0	0	0	0	0
DTDPRHAMSYN-PWY: dTDP-L-rhamnose biosynthesis I|g__Capnocytophaga.s__Capnocytophaga_ochracea	0	0	0	0	0	0	0	0	0	0	0	0	0	0	0.918383	0	0	1.19637	1.95675	1.65844	2.61613	1.01049	1.27854	2.1744	0	0	1.22579	0	0	0	0.574434	0	0	0	0	0	0	1.90466	1.17909	0	1.11175	0	2.03742	0	1.61582	0.900272	0
DTDPRHAMSYN-PWY: dTDP-L-rhamnose biosynthesis I|g__Eikenella.s__Eikenella_corrodens	0	0	0	0	0	0	0	0	0	0	0	0	0	0	0	0	0	0	0	0	0	0	0	0	0	0	0	0	0	0	0	0	0	0	0	0	0.252229	0	0	0	0	1.13957	0	0	0	0	0
DTDPRHAMSYN-PWY: dTDP-L-rhamnose biosynthesis I|g__Escherichia.s__Escherichia_coli	2.13279	0	0	0	0	0	0	0	0	0	0	0	0	0	0	1.79768	0	0	0	0	0	0	0	0.630803	0	0	0	0	0	0	0	0	0	0	0	1.15589	0	0	0	0	0	0	0	0	0	0	47.1528
DTDPRHAMSYN-PWY: dTDP-L-rhamnose biosynthesis I|g__Fusobacterium.s__Fusobacterium_necrophorum	0	0	0	0	0	0	0	0	0	0	0	0	0	0	0	0	0	0	0	0	0	0	0	0	0	0	0	0	0	0	0	9.23298	0	0	0	0	0	0	0	0	0	0	0	0	0	0	0
DTDPRHAMSYN-PWY: dTDP-L-rhamnose biosynthesis I|g__Fusobacterium.s__Fusobacterium_nucleatum	0	10.0348	1.912	1.26277	1.94712	3.43102	0.929646	2.42008	2.34252	3.92391	2.86715	8.19764	1.79516	4.80028	4.28094	7.2583	5.2749	12.0537	12.7262	8.01297	2.6901	1.17422	7.83249	10.9405	0	2.55121	14.5435	5.65636	5.2328	3.68812	6.77475	4.60595	2.85209	5.428	1.44648	4.33862	1.83319	12.5601	2.16032	3.03028	6.64311	7.55969	4.32321	5.24475	6.63688	1.07091	2.19633
DTDPRHAMSYN-PWY: dTDP-L-rhamnose biosynthesis I|g__Fusobacterium.s__Fusobacterium_periodonticum	0	0	0	0	0	0	0	0	0	0	0	0	0	0	0	0	0	2.13584	0	0	0	0	0	0	0	0	0	0	0	0	0	0	0	0	0	0	0	0	0	0	0	0	0	0	0	0	0
DTDPRHAMSYN-PWY: dTDP-L-rhamnose biosynthesis I|g__Kingella.s__Kingella_denitrificans	0	0	0	0	0	0	0	0	0	0	0	0.803211	0	0	0	0	0	0	0	0.80092	1.81139	0	0.659126	0	0	0	0	0	0	0	0	0	0	0	0	2.27414	0.343292	0	0	0.484794	0	0	0	0	0	0	0
DTDPRHAMSYN-PWY: dTDP-L-rhamnose biosynthesis I|g__Kingella.s__Kingella_oralis	0	0	0	0	0	0	0	0	0	0	0	0	0	0	0	0	0	0	0	0	0	0	0	0	0	0	0	0	0	0	0	0	0	1.08061	0	0	0	0	0.473933	0	0	0	0	0	0	0	0
DTDPRHAMSYN-PWY: dTDP-L-rhamnose biosynthesis I|g__Lachnoanaerobaculum.s__Lachnoanaerobaculum_saburreum	0	0	0	0	0	0	0	0	0	0	0	0	0	0	0	0	0	0	0	0	0	0	0	0	0	0	0	0	0	0	0	0	0	0	0	0	0	0	0	0	0	1.07112	0	0	0	0	0
DTDPRHAMSYN-PWY: dTDP-L-rhamnose biosynthesis I|g__Lachnospiraceae_noname.s__Lachnospiraceae_bacterium_ICM7	0	0	13.244	0	0	0	0	0	0	0	0	1.0412	0	0	0	0	0	0	0	0	0	0	2.16943	0.146169	0	0.746222	0	2.04885	1.25443	1.3447	0	0	2.00605	1.39223	0	0	3.04364	0	1.12728	0.7049	4.11546	0	0	2.57069	0.881363	0	0
DTDPRHAMSYN-PWY: dTDP-L-rhamnose biosynthesis I|g__Lachnospiraceae_noname.s__Lachnospiraceae_bacterium_oral_taxon_082	0	0	0	0	0	0	0	0	0	0	0	1.02239	0	1.03823	0.558775	0.219815	0	0	0	0	2.24302	0	1.11453	1.86487	0	0	0	0	1.14251	2.73492	0	2.74396	1.61178	0	0	1.31866	0	0	0.98869	0.526507	0.340097	0	0	0	0	0	0
DTDPRHAMSYN-PWY: dTDP-L-rhamnose biosynthesis I|g__Lachnospiraceae_noname.s__Lachnospiraceae_oral_taxon_107	0	0	0	0	0	0	0	0	0	0	0	0	0	0	0	0	0	0.734838	0	0	0	0	0.547091	0	0	0	0	0	0	0	0	0	0	0	0	0	0	0	0	0	0	0.709988	0	0	0	0	0
DTDPRHAMSYN-PWY: dTDP-L-rhamnose biosynthesis I|g__Lautropia.s__Lautropia_mirabilis	0	1.00603	2.70978	0	0	0	0	2.37598	0	0	0	10.6241	0	1.42837	0	0.438531	0.957333	3.81192	0	0.806292	2.20547	0	6.58728	0.278663	0	1.05392	0	8.11688	7.76414	3.88257	21.9357	7.45247	3.00125	9.99973	0	1.97712	1.22555	10.1766	12.906	8.63183	1.17178	0	0	0.799385	0.870338	0	0
DTDPRHAMSYN-PWY: dTDP-L-rhamnose biosynthesis I|g__Leptotrichia.s__Leptotrichia_buccalis	0	0	0	0	0	0	0	0	0	0	0	0	0	0	0	0	0	0	0	0	0	0	0	0.516232	0	0	0	0	0	0	0	0	0	0	0	0	0	0	0	0	0	0	0	0	0	0	0
DTDPRHAMSYN-PWY: dTDP-L-rhamnose biosynthesis I|g__Leptotrichia.s__Leptotrichia_goodfellowii	0	0	0	0	0	0	0	0	0	0	0	0	0	0	0	0	0	0	0	0	0	0	0	0.0529008	0	0	0	0	0	0	0	0	0	0.823568	0	0	0	0	0.570539	0	0	0	0	0	0	0	0
DTDPRHAMSYN-PWY: dTDP-L-rhamnose biosynthesis I|g__Leptotrichia.s__Leptotrichia_hofstadii	0	0	0	0	0	0	0	0	0	0	0	0	0	0	0.840971	0	0	0	0	0	0	0	0	0.188858	0	0	0	0	0	0	0	0	0	0	0	0	0	0	0	1.00818	0	0	0	0	0	0	0
DTDPRHAMSYN-PWY: dTDP-L-rhamnose biosynthesis I|g__Megasphaera.s__Megasphaera_micronuciformis	0	0	0	1.18815	0	2.89132	1.61212	0	0	0	0	2.62022	0	0	2.10412	0	3.17984	0	0	0	0	0	0	3.68734	0	0	0	0	0	0	0	0	0	0	0	3.55918	0	0	4.12384	0	0	0	0	1.32014	6.23213	5.2723	0
DTDPRHAMSYN-PWY: dTDP-L-rhamnose biosynthesis I|g__Neisseria.s__Neisseria_elongata	0	0	0	0	0	0	0	0	0	0	0	0	0	0	0	0	0	0.795743	0	0	0.522011	0	0	0.415756	0	0	0	0	0.641188	0	0	0	0	0.820996	0	0	0.795287	3.28934	1.70996	0	0.953971	0	0	0	0	0	0
DTDPRHAMSYN-PWY: dTDP-L-rhamnose biosynthesis I|g__Neisseria.s__Neisseria_flavescens	0	8.86549	0	1.06993	1.04826	0	2.08496	1.14798	0	0	2.39534	6.40032	0	5.52403	0.63309	0	0	3.23339	2.6882	6.96179	0	0.746022	3.42021	2.67359	0	5.88217	3.07795	34.4615	3.05555	4.48863	17.5981	0	1.09378	28.4846	0	0	2.45919	63.1177	2.66258	11.4646	25.3931	2.75654	0	3.72923	0.883633	0	3.70007
DTDPRHAMSYN-PWY: dTDP-L-rhamnose biosynthesis I|g__Neisseria.s__Neisseria_macacae	0	0	0	0	0	5.55067	0	0	0	0	0.891495	1.38628	0	0	0	0	0	2.41486	2.63551	1.83169	2.14538	0	2.45725	0.293703	0	0	6.20163	4.72198	0	0	6.35025	0	0	0	0	3.09353	3.4032	1.86514	0	5.1489	0	1.3489	0	2.01355	0	0	0
DTDPRHAMSYN-PWY: dTDP-L-rhamnose biosynthesis I|g__Neisseria.s__Neisseria_meningitidis	0	0	0	0	0	0	0	0	0	0	0	0	0	2.45886	0	0	0	0	0	1.14515	0	0	0	0	0	1.84109	0	0	0	0	0	0	0	0	0	0	0	0	0	0.810727	0	0	0	1.44463	0	0	0
DTDPRHAMSYN-PWY: dTDP-L-rhamnose biosynthesis I|g__Neisseria.s__Neisseria_sicca	1.96056	0.84842	0	1.64616	0	13.1722	2.10854	0	0	1.5046	1.44344	14.4729	2.12157	0.887161	2.06256	0	0	5.91018	1.8242	4.88155	5.7924	3.46945	6.22432	4.13165	0	0.855473	16.0726	38.4684	0	0	12.0839	2.27366	5.69121	24.9893	3.97047	3.85067	4.93962	6.17691	2.76893	19.1847	4.64854	3.82613	3.97907	3.99974	2.41008	0	0
DTDPRHAMSYN-PWY: dTDP-L-rhamnose biosynthesis I|g__Neisseria.s__Neisseria_sp_oral_taxon_014	0	0	0	0	0	0	0	0	0	0	0	0	0	0	0	0	0	0	0	0	0	0	0	0	0	0	0	0	0	0	0	0	0	0	0	0	0	0	0	0	2.90017	0	0	0	0	0	0
DTDPRHAMSYN-PWY: dTDP-L-rhamnose biosynthesis I|g__Neisseria.s__Neisseria_subflava	0	8.6672	0	0	0	0	2.13764	0	0	0	2.07185	4.34522	0	13.9563	0	0	0	1.79897	1.53582	3.56408	0	0	0	4.66541	0	0	0	25.0508	9.13539	15.6561	29.0395	0	0	21.219	0	0	0	24.7723	6.8252	5.77115	15.6684	0	0	1.35554	0	0	0
DTDPRHAMSYN-PWY: dTDP-L-rhamnose biosynthesis I|g__Oribacterium.s__Oribacterium_sinus	0.910673	3.64157	2.06551	0	0	6.60256	0.805109	1.1825	4.22669	0	1.95822	8.0507	1.50509	13.5902	2.31227	3.10146	1.44713	8.89917	2.71873	0.608294	1.33486	0	2.54327	0.391666	0.945246	1.09681	2.86491	2.70517	3.5964	9.67368	4.0981	0	4.19843	2.90747	2.21585	1.46797	9.29645	0	11.7498	9.76917	6.84457	1.27805	13.9106	0.981375	0	4.39964	3.25901
DTDPRHAMSYN-PWY: dTDP-L-rhamnose biosynthesis I|g__Peptostreptococcaceae_noname.s__Eubacterium_yurii	0	1.23638	0	0	0	0	0	0	0	0	0	0	0	1.31302	0	0	0	0	0	0	0	0	0	0.0582027	0	0	0	0	0	0	0	0	0	0	0	0	0.708023	0	0	0	0	0	0	0	0	0	0
DTDPRHAMSYN-PWY: dTDP-L-rhamnose biosynthesis I|g__Porphyromonas.s__Porphyromonas_catoniae	0	0.51478	0	0	0	0	1.15821	0.99793	0	1.17222	0	0.975548	0	0	1.45622	1.27133	2.27087	0.892607	2.59758	3.6989	0.698404	0	0.727038	1.92031	0	1.65361	0	0	0	0	0	0	0	0.686993	0	0	2.53904	0	0	0	0.704142	1.86776	0	0	0	0	0
DTDPRHAMSYN-PWY: dTDP-L-rhamnose biosynthesis I|g__Porphyromonas.s__Porphyromonas_endodontalis	0	0	0	0	0	0	0	0	0	0	1.12421	0	0	1.65961	0.983555	0	0	1.13785	3.32076	0	0	0	0	0	0	1.21555	0	0	0	0	0	0	0	0	0	0	0	1.89094	0	0	1.25005	0	2.10295	0	1.95069	0	0
DTDPRHAMSYN-PWY: dTDP-L-rhamnose biosynthesis I|g__Porphyromonas.s__Porphyromonas_sp_oral_taxon_279	0	7.72068	7.06718	0	6.90406	0	19.8745	0	2.29447	0	1.76727	13.7793	0	0	3.58072	0.169021	2.57637	3.10741	4.6675	8.80675	0	2.7559	4.95405	0.258892	0	2.65911	0	18.5571	0	1.14506	0	0	0	7.36161	38.0556	0	8.40596	4.2133	1.28396	9.16329	0	26.8216	0	0	2.59408	2.53833	0
DTDPRHAMSYN-PWY: dTDP-L-rhamnose biosynthesis I|g__Prevotella.s__Candidatus_Prevotella_conceptionensis	0	0	0	0	0	0	0	0	0	0	0	1.57823	0	0	0	0	1.35238	0	0	0	0	0	0.472483	0.441078	0	0	0	0	0	0	0.700122	0	0	1.1004	0	0	0	0	0	0	0	2.55278	0	0	0	0	0
DTDPRHAMSYN-PWY: dTDP-L-rhamnose biosynthesis I|g__Prevotella.s__Prevotella_denticola	1.37847	5.66044	0	2.12035	0	0	1.8228	0	3.11127	2.6904	1.89527	9.58606	5.68701	0	1.87459	2.32519	0	2.74358	0	0	0	0	0	6.70087	0	0	0	0	0	0	0	0	0	0	0	0	0	0	0	0	0	0	0	2.80044	0.793825	0	0
DTDPRHAMSYN-PWY: dTDP-L-rhamnose biosynthesis I|g__Prevotella.s__Prevotella_histicola	283.881	5.91109	11.3358	7.97889	339.132	85.3391	7.82689	40.601	28.0657	208.834	3.71624	25.8117	118.722	23.1229	258.973	94.8198	16.1865	9.1133	7.07321	0.809176	40.2724	91.5434	43.8069	99.6534	105.134	0	0	2.11482	27.2452	47.4983	4.2942	115.874	32.907	3.6385	10.0775	271.187	0	1.55748	43.2747	35.2714	2.20909	1.27402	10.7482	28.2701	83.8547	62.6384	159.161
DTDPRHAMSYN-PWY: dTDP-L-rhamnose biosynthesis I|g__Prevotella.s__Prevotella_intermedia	0	0	0	0	0	0	0	0	2.2443	0	0	0	0	0	0.529435	0	0	0	0	0	0	0	3.40224	0	0	1.00854	0	0	0	0	0	10.5399	0	0	1.29259	0	0	0	0	0	1.90201	1.01393	1.90065	0	0	0	0
DTDPRHAMSYN-PWY: dTDP-L-rhamnose biosynthesis I|g__Prevotella.s__Prevotella_loescheii	0	3.39953	0	0	0	0	1.40524	0	0	0	0	0	0	0	0	0	0	0	1.87051	0	0	0	1.88848	0.531815	0	0	0	0	0	0.694988	0	0	0.972948	0	0	0	1.07179	0	0	0	1.83528	0	0	0	0	0	0
DTDPRHAMSYN-PWY: dTDP-L-rhamnose biosynthesis I|g__Prevotella.s__Prevotella_marshii	0	0	0	0	0	0	0.829697	0	0	0	0.750182	0	0	0	0	0	0	0	0	0	0	0	0	0	0	0	0	0	0	0	0	0	0	0	0	0	0	0	0	0	0	1.76033	0	0	0.915014	0	0
DTDPRHAMSYN-PWY: dTDP-L-rhamnose biosynthesis I|g__Prevotella.s__Prevotella_melaninogenica	60.2729	181.013	57.8145	213.292	43.481	58.8862	73.6294	223.632	220.245	280.797	19.6346	61.814	23.3355	66.9841	34.4783	52.7556	152.804	30.9352	90.4232	82.7848	135.097	31.9483	37.1659	38.8563	245.431	172.661	41.0386	48.8486	111.827	60.8904	25.1733	2.21431	59.1206	34.4362	89.997	24.9239	28.957	17.9403	63.4433	49.9731	65.6879	70.7028	31.4274	81.2498	45.0254	87.3335	161.038
DTDPRHAMSYN-PWY: dTDP-L-rhamnose biosynthesis I|g__Prevotella.s__Prevotella_multiformis	0	0	0	0	0	0	0	0	0	0	0	0	1.7765	0	0	0	0	0	0	0	0	0	0	0	0	0	0	0	0	0	0	0	0	0	0	0	0	0	0	0	0	0	0	0	0	0	0
DTDPRHAMSYN-PWY: dTDP-L-rhamnose biosynthesis I|g__Prevotella.s__Prevotella_nigrescens	0	17.8416	0.952498	4.77778	2.09509	5.6357	11.7367	0	0	0	0	17.2257	5.06507	1.0838	6.21007	3.06353	1.21851	6.09496	4.97043	0	0	1.12718	13.3627	9.065	0.989621	10.4473	2.4639	0	1.92974	5.29507	3.82223	1.49177	0	4.84635	0	2.1039	0	1.87503	0	0	2.82547	0.977026	2.22279	7.29085	21.3052	11.0605	3.89067
DTDPRHAMSYN-PWY: dTDP-L-rhamnose biosynthesis I|g__Prevotella.s__Prevotella_pleuritidis	0	0	0	1.79775	0	0	0	0	0	0	0	0	0	0	0	0	0	0	0	0	0	0	4.43109	0	0	0	0	0	2.2599	0.378714	2.41578	1.85737	0	0	0	0	0	0	0	0	1.04128	0	0	0	1.22943	0	0
DTDPRHAMSYN-PWY: dTDP-L-rhamnose biosynthesis I|g__Prevotella.s__Prevotella_salivae	132.476	1.70658	1.73904	93.2646	46.5056	6.59608	13.5327	27.2942	14.3333	25.2211	27.3019	4.63009	120.077	10.8262	34.2927	24.6181	8.65165	4.72135	6.12324	21.0819	14.1149	56.9133	10.5015	20.9135	54.3145	42.9276	0	3.64368	1.49045	30.4443	0.531449	18.5913	18.4951	1.74736	26.5407	24.8538	0.534155	1.35927	14.8893	4.6542	2.79496	7.75051	5.97828	13.1544	29.3141	17.7326	9.6521
DTDPRHAMSYN-PWY: dTDP-L-rhamnose biosynthesis I|g__Prevotella.s__Prevotella_sp_C561	0	0	0	0	0	0	0	0	23.8771	0	0	0	0	0	0	0	0	0	0	0	0	82.9725	0	27.0751	0	0	0	0	0	0	0	0	0	0	0	0	0	0	12.2625	0	0	0	0	0	0	0	0
DTDPRHAMSYN-PWY: dTDP-L-rhamnose biosynthesis I|g__Prevotella.s__Prevotella_sp_oral_taxon_306	0	0	0	0	7.4871	0	0	0	0	0	0	0	0	0	0	24.8757	0	0	0	0	0	0	0	2.83236	0	13.1939	0	0	0	0	0	0	0	0	0	0	0	0	10.4966	0	0	0	0	0	0	0	0
DTDPRHAMSYN-PWY: dTDP-L-rhamnose biosynthesis I|g__Rothia.s__Rothia_aeria	0	0	0.670113	0	0	0	0	0	0.923735	0	0	3.49549	0	1.04802	0	0	0	0	2.29222	1.09766	0.668874	0	5.17039	0.721083	0	0.674138	18.7091	2.8257	1.5815	0.803827	3.56342	0	0.725293	5.92404	0	1.22952	1.97524	0	1.49052	2.10192	1.99969	0	0	0.595146	0	0	0.90379
DTDPRHAMSYN-PWY: dTDP-L-rhamnose biosynthesis I|g__Selenomonas.s__Selenomonas_artemidis	0	1.2491	0	0	0	0	0	0	0	0	0	0	0	0	0	0	0	0	0	0	0	0	0	1.28738	0	0	0	0	0	0	0	0	0	0	0	0	0	0	1.23315	0	0	1.30909	0	0	0	0	0
DTDPRHAMSYN-PWY: dTDP-L-rhamnose biosynthesis I|g__Selenomonas.s__Selenomonas_flueggei	0	0	0	5.64367	0	0	0	0	0	0	0	1.77225	2.13476	0	0	0	0	0	1.4859	1.17318	0	0	0	0.121364	0	0	0	0	0	0	0	0	9.04333	0	0	0.911297	0	0	0	0.72783	0	1.20699	0	0	0	0	0
DTDPRHAMSYN-PWY: dTDP-L-rhamnose biosynthesis I|g__Selenomonas.s__Selenomonas_infelix	0	0	0	0	0	0	0	0	0	0	0	0	0	0	0	0	0	0	1.17257	0	0	0	0	0	0	0	0	0	0	0	0	0	0	0	0	0	0	0	0	0	0	0	0	0	0	0	0
DTDPRHAMSYN-PWY: dTDP-L-rhamnose biosynthesis I|g__Selenomonas.s__Selenomonas_noxia	0	2.71761	0	0	0	0	1.41849	0	1.51139	0	0	1.98022	1.8833	0.919159	0	0.165993	2.28996	0	3.79921	0	0	0	0	4.49824	0	0	1.38664	0	0.915742	0.879995	0.804013	4.19412	0	0	0	0.81047	0	0	0	1.56349	0.264152	0.928088	11.984	0	0	6.48499	4.38046
DTDPRHAMSYN-PWY: dTDP-L-rhamnose biosynthesis I|g__Selenomonas.s__Selenomonas_sputigena	0	0	0	0	0	0	0	0	0	0	0	1.01776	0	0	0	0	0	0	0	5.85113	0	1.40128	2.89247	0	0	0.885522	0	0	0	0	0	0	1.68053	0	1.89355	0	0	0	0	0	0	0.872069	1.6635	0	1.81051	0.77106	0
DTDPRHAMSYN-PWY: dTDP-L-rhamnose biosynthesis I|g__Streptococcus.s__Streptococcus_australis	0	3.54037	5.46527	0.853723	0	0	1.57104	0	0	0	2.02819	0	0	0	0	0	0.945505	0	4.40884	0.824862	0	0	0	0.356495	0	0	3.76771	5.69904	12.0328	2.37085	11.5905	0	1.77921	25.3042	2.89832	0	11.3927	11.934	1.4195	0	5.17042	0.878557	0	0	0	0	0
DTDPRHAMSYN-PWY: dTDP-L-rhamnose biosynthesis I|g__Streptococcus.s__Streptococcus_pyogenes	0	0	0	0	0	0	0	0	0	0	0	0	0	0	0	0	0	0	0	0	0	0	0	0.0938409	0	0	0	0	0	0	0	0	0	0	0	0	0	0	0	0	0	0	0	0	0	0	0
DTDPRHAMSYN-PWY: dTDP-L-rhamnose biosynthesis I|g__Streptococcus.s__Streptococcus_sanguinis	6.07471	2.8646	26.7863	1.76188	1.88183	39.1671	18.6521	8.29448	5.05043	11.1905	13.1909	24.6885	4.69757	4.18792	9.70834	7.17129	2.02216	28.7908	17.9614	9.00442	8.30056	11.6018	21.2046	5.75634	1.6879	4.7319	45.2441	13.5423	11.7287	11.4363	26.3891	4.08547	16.4033	28.6345	2.57264	7.60013	20.3206	1.95731	7.20348	22.8541	9.0944	3.5939	11.2184	11.9923	23.7254	8.90849	5.05816
DTDPRHAMSYN-PWY: dTDP-L-rhamnose biosynthesis I|g__Treponema.s__Treponema_socranskii	0	0	0	0	0	0	0	0	0	0	0	0	0	0	0	0	0	0	0	0	0	0	0.878267	0	0	0	0	0	0	0	0	0	0	0	0	0	0	0	0	0	0	0	0	0	0	0	0
DTDPRHAMSYN-PWY: dTDP-L-rhamnose biosynthesis I|g__Veillonella.s__Veillonella_atypica	2.04181	50.8209	1.60964	16.3051	8.42172	19.7052	5.43768	0	0	1.61459	2.55398	3.4852	6.07648	27.7599	0	50.1163	8.79602	19.02	4.27358	0	6.44186	0	0	2.77696	43.1808	0	0	0	0	13.0001	1.09112	13.5516	0	0	5.51882	25.6224	0.448513	0	27.6767	24.4257	0	10.9237	7.58658	7.27055	17.6847	40.0797	12.839
DTDPRHAMSYN-PWY: dTDP-L-rhamnose biosynthesis I|unclassified	27.9905	35.1675	28.3346	40.717	24.7703	7.90391	63.6935	65.9935	26.7569	39.5184	41.3316	39.1738	25.8429	44.5042	33.414	46.0448	76.0601	17.8476	24.3942	69.9694	60.2131	34.2737	18.3264	55.511	39.3957	77.0088	2.92061	17.1217	44.0849	25.1094	22.2677	57.4324	69.4485	19.5418	74.4817	75.9109	98.506	14.4072	30.6211	35.6389	51.0233	41.5132	32.1815	33.6217	39.4567	56.6491	24.794
ECASYN-PWY: enterobacterial common antigen biosynthesis	0	0	0	0	0	0	0	0	0	0	0	0	0	0	0	0	0	0	0	0	0	0	0	0.574881	0	0	0	0	0	0	0	0	0	0	0	0.926646	0	0	0	0	0	0	0	0	0	0	27.8674
ECASYN-PWY: enterobacterial common antigen biosynthesis|g__Escherichia.s__Escherichia_coli	0	0	0	0	0	0	0	0	0	0	0	0	0	0	0	0	0	0	0	0	0	0	0	0.415458	0	0	0	0	0	0	0	0	0	0	0	0.75522	0	0	0	0	0	0	0	0	0	0	24.6964
ENTBACSYN-PWY: enterobactin biosynthesis	0	0	0	0	0	0	0	0	0	0	0	0	0	0	0	0	0	0	0	0	0	0	0	8.78785	0	0	0	0	0	0	0	0	0	0	0	7.12062	0	0	0	0	0	0	0	0	0	15.3474	153.147
ENTBACSYN-PWY: enterobactin biosynthesis|g__Escherichia.s__Escherichia_coli	0	0	0	0	0	0	0	0	0	0	0	0	0	0	0	0	0	0	0	0	0	0	0	1.51948	0	0	0	0	0	0	0	0	0	0	0	0	0	0	0	0	0	0	0	0	0	0	86.136
FAO-PWY: fatty acid &beta;-oxidation I	0	0	0	0	0	0	0	0	0	0	0	0	0	0	0	0.827598	0	0	0	0	0	0	0	7.61231	0	0	0	0	0	0	0	0	0	0	0	0.666467	0	0	0	0	0	0	0	0	0	0.71549	20.8585
FAO-PWY: fatty acid &beta;-oxidation I|g__Escherichia.s__Escherichia_coli	0	0	0	0	0	0	0	0	0	0	0	0	0	0	0	0.560063	0	0	0	0	0	0	0	0.0388981	0	0	0	0	0	0	0	0	0	0	0	0.474297	0	0	0	0	0	0	0	0	0	0.497744	20.1167
FAO-PWY: fatty acid &beta;-oxidation I|unclassified	0	0	0	0	0	0	0	0	0	0	0	0	0	0	0	0	0	0	0	0	0	0	0	2.16426	0	0	0	0	0	0	0	0	0	0	0	0	0	0	0	0	0	0	0	0	0	0	0
FASYN-ELONG-PWY: fatty acid elongation -- saturated	728.755	273.105	274.204	470.77	538.019	315.482	306.013	342.855	290.956	360.899	291.868	368.566	561.319	341.762	318.032	320.767	285.975	223.863	272.53	317.05	345.645	406.735	312.285	307.472	489.66	454.125	236.98	360.538	269.739	366.648	340.994	284.608	378.091	400.76	326.804	372.409	297.309	372.484	310.382	268.996	350.971	266.652	174.64	282.53	338.416	255.216	220.508
FASYN-ELONG-PWY: fatty acid elongation -- saturated|g__Aggregatibacter.s__Aggregatibacter_aphrophilus	0	0	0	0	0	0	0	0	0	0	0	0	0	0	0	0	0	0	0	0	0	0	0	0.522093	0	0	0	0	0	0	1.49821	0	0	0	0	0	0	0	0	0	0	0	0	0	0	0	0
FASYN-ELONG-PWY: fatty acid elongation -- saturated|g__Aggregatibacter.s__Aggregatibacter_segnis	0	0	0	0	0	0	2.56968	0	0	0	0	0	0	0	0	0	1.48597	0	0	5.79526	0	0	1.10184	0	0	1.27044	0	0	0	0	3.18342	0	3.19631	4.68019	0	0	0	0	0	0	0	5.05924	0	0	0	0	0
FASYN-ELONG-PWY: fatty acid elongation -- saturated|g__Campylobacter.s__Campylobacter_rectus	0	0	0	0	0	0	0	0	0	0	0	0	0	0	0	0	0	0	0	0	0	0	1.43324	0	0	0	0	0	0	0	0	0	0	0	0	0	0	0	0	0	0	0	0	0	0	0	0
FASYN-ELONG-PWY: fatty acid elongation -- saturated|g__Campylobacter.s__Campylobacter_showae	0	6.99723	0	0	0	0	0	0	0	0	0	0	0	0	0	0	0	1.59161	2.57427	3.71103	0	0	0	0.395833	0	0	0	0	0	1.18483	0	0	1.31804	0.540298	0	0	0	0	1.73831	0	0.686526	0	0	0	0	0	0
FASYN-ELONG-PWY: fatty acid elongation -- saturated|g__Capnocytophaga.s__Capnocytophaga_gingivalis	0	1.49412	4.43157	0	0	0	0.963702	0	0	0	0	1.65144	0	0	0.416282	0	0	0	0	4.52106	1.01093	0	0.815527	1.75074	0	0.685393	0	5.02113	1.86818	0.371846	1.54186	0	4.21209	0.883381	0	0	0.754501	3.29201	2.01753	0	0.412483	0	0	1.63086	0	0	0
FASYN-ELONG-PWY: fatty acid elongation -- saturated|g__Capnocytophaga.s__Capnocytophaga_granulosa	0	0	0	0	0	0	0	0	0	0	0	0	0	0	0	0	0	0	0	0	0	0	0	0.0311474	0	0	0	0	0	0	0	0	0	0	0	0	0	0	0	0	0	0	0	0	0	0	0
FASYN-ELONG-PWY: fatty acid elongation -- saturated|g__Cardiobacterium.s__Cardiobacterium_hominis	0	0	0	0	0	0	0	0	0	0	0	0	0	0	0	0	0	0	0	0	0	0	0.657034	0.234571	0	0	0	0	0	0	0	0	0	0.315112	0	0	0	0	0	0	0.547419	0	0	0	0	0	0
FASYN-ELONG-PWY: fatty acid elongation -- saturated|g__Enhydrobacter.s__Enhydrobacter_aerosaccus	0	0	0	0	0	0	0	0	0	0	0	0	0	0	0	0	0	0	0	0	0	0	0	0.236829	0	0	0	0	0	0	0	0	0	0	0	0	0	0	0	0	0	0	0	0	0	0	0
FASYN-ELONG-PWY: fatty acid elongation -- saturated|g__Escherichia.s__Escherichia_coli	0	0	0	0	0	0	0	0	0	0	0	0	0	0	0	0.223681	0	0	0	0	0	0	0	0.138966	0	0	0	0	0	0	0	0	0	0	0	0	0	0	0	0	0	0	0	0	0	0	22.9443
FASYN-ELONG-PWY: fatty acid elongation -- saturated|g__Haemophilus.s__Haemophilus_haemolyticus	0	0	0	0	0	0	1.52904	0	0	0	0	0	0	0	0	0	0	0	0	0.959655	0	0	0	0	0	0	0	1.62751	0	0	0	0	3.3042	0.948909	0	0	0.663193	0	0	0.776436	0.514333	0	0	0	0	0	0
FASYN-ELONG-PWY: fatty acid elongation -- saturated|g__Haemophilus.s__Haemophilus_influenzae	0	0	0	0	0	8.20774	0	0	0	0	0	0	0	2.63538	0	2.71388	0	0	0	0	1.52355	0	0	0	0	0	0	0	0	0	0	0	2.70901	0	0	0	0.442702	0	0.247669	0	0	0	0	0	0	0	0
FASYN-ELONG-PWY: fatty acid elongation -- saturated|g__Haemophilus.s__Haemophilus_parainfluenzae	0	9.60668	19.8528	10.4428	3.34265	5.17409	7.36168	0	13.7009	0	4.93344	6.93841	4.40254	30.6658	6.23269	3.06306	4.2359	2.92639	11.8638	17.3797	8.47132	5.28275	10.4303	7.529	0	2.80312	5.28849	19.4597	9.36394	0	6.79416	0	9.61479	63.044	3.89692	3.01252	14.328	28.8844	9.56737	3.30934	27.8943	4.74437	0	6.53645	4.95044	0	0
FASYN-ELONG-PWY: fatty acid elongation -- saturated|g__Moraxella.s__Moraxella_catarrhalis	0	0	0	0	0	0	0	0	0	0	0	0	0	0	0	1.35593	0	0	0	0	0	0	0	0	0	0	0	0	0	0	0	0	0	0	0	0	0	0	0	0	0	0	0	0	0	0	0
FASYN-ELONG-PWY: fatty acid elongation -- saturated|g__Neisseria.s__Neisseria_cinerea	0	0	0	0	0	0	0	0	0	0	0	0	0	0	0	0	0	0	0	0	1.86952	0	0	0	0	0	0	0	0	0	0	0	0	0	0	0	0	0	0	0	0	0	0	0	0	0	0
FASYN-ELONG-PWY: fatty acid elongation -- saturated|g__Neisseria.s__Neisseria_flavescens	0	6.25368	0	3.14263	3.14989	0	0	3.74769	0	0	3.64567	0	0	5.11439	0.843568	0	1.68282	0	3.80156	7.24406	0	0	4.86086	2.30076	0	4.75246	0	8.59799	10.1246	5.18312	32.7014	0	6.78621	28.6227	0	0	7.78074	66.3163	8.24672	8.2479	26.4354	5.40613	0	5.65504	0	0	0
FASYN-ELONG-PWY: fatty acid elongation -- saturated|g__Neisseria.s__Neisseria_macacae	0	0	0	0	0	9.63965	0	0	0	0	0	9.29392	0	0	0	0	0	2.95417	6.77125	0	4.29099	0	6.46114	1.55105	0	0	15.1462	18.5879	0	0	8.26097	0	0	0	0	3.42914	5.17823	3.18042	0	3.05479	0	4.92925	0	0	0	0	0
FASYN-ELONG-PWY: fatty acid elongation -- saturated|g__Neisseria.s__Neisseria_sp_oral_taxon_014	0	0	0	0	0	0	0	0	0	0	0	0	0	0	0	0	0	0	0	0	0	0	0	0	0	0	0	0	0	0	0	0	0	0	0	0	0	0	0	0	8.19457	0	0	0	0	0	0
FASYN-ELONG-PWY: fatty acid elongation -- saturated|g__Neisseria.s__Neisseria_subflava	0	8.70927	0	0	0	0	0	0	0	0	2.49791	5.01668	0	3.59986	0	0	0	0	2.51362	2.55153	0	0	0	3.76815	0	0	0	0	2.58216	7.69072	8.91415	0	0	15.7868	0	0	0	38.8627	2.0595	5.19532	23.6493	0	0	0	0	0	0
FASYN-ELONG-PWY: fatty acid elongation -- saturated|g__Prevotella.s__Prevotella_buccae	0	0	0	0	0	0	0	0	0	0	0	0	0	0	0	0	0	0	0	0	0	0	0.547099	0	0	0	0	0	0	0	0	0	0	0	0	0	0	0	0	0	0	0	0	0	0	0	0
FASYN-ELONG-PWY: fatty acid elongation -- saturated|g__Prevotella.s__Prevotella_loescheii	0	4.58126	0	0	0	0	0	0	0	0	0	0	0	0	0	0	0	0	1.20528	0.467652	0.40454	0	2.14295	0.39792	0	0	0	0	0	0	0	0	0	0	0	0	0.985975	0	0	0	1.59613	0	0	0	0	0.794046	0
FASYN-ELONG-PWY: fatty acid elongation -- saturated|g__Prevotella.s__Prevotella_marshii	0	0	0	0	0	0	0	0	0	0	0	0	0	0	0	0	0	0	0	0	0	0	0	0	0	0	0	0	0	0	0	0	0	0	0	0	0	0	0	0	0	1.66123	0	0	0	0	0
FASYN-ELONG-PWY: fatty acid elongation -- saturated|g__Prevotella.s__Prevotella_micans	0	0	0	0	0	0	0	0	0	0	0	0	0	0	0	0	2.31504	0	0	0	0	0	0.596069	1.16093	0	0	0	0	0	0	0	0	0	0	0	0	0	0	0	0	0	2.91778	0	0	0	0	0
FASYN-ELONG-PWY: fatty acid elongation -- saturated|g__Prevotella.s__Prevotella_oris	1.17269	8.27043	1.82779	4.07462	0	0	2.20556	0	0	2.2321	0	3.90458	11.6572	0.712785	8.18661	7.28172	0	2.75585	2.30938	0	0	0.654636	1.38562	1.0781	0	1.51591	2.19185	0	0.76024	1.58796	0	5.84511	0	0.82909	0	3.0082	0.377953	5.92412	0	0.882546	0.393057	1.98419	4.06694	1.4436	16.0579	4.14929	2.98784
FASYN-ELONG-PWY: fatty acid elongation -- saturated|g__Prevotella.s__Prevotella_salivae	192.744	1.6927	0	119.555	71.5882	20.8164	24.3239	40.1096	18.4644	38.7199	35.3441	13.8517	191.981	20.2101	35.5613	36.5903	14.7936	7.23722	9.73438	28.281	26.1812	73.1354	18.001	30.3538	81.7166	60.5224	0	0	0	39.9568	0.657584	32.6604	34.2618	2.08741	41.1645	32.7831	0.69594	0	22.202	6.0888	2.61144	13.6028	7.45864	17.6495	29.1988	29.9414	14.0715
FASYN-ELONG-PWY: fatty acid elongation -- saturated|unclassified	0	28.7332	19.4882	14.8305	17.1601	0	27.258	22.7769	0	11.1862	13.8839	19.9843	0	8.83641	7.73672	9.21285	19.5957	16.2821	11.2643	20.3576	7.03142	15.5446	0	17.8713	10.1753	44.0139	0	0	12.5633	3.51459	0	13.0445	16.9422	10.4061	32.2086	18.9355	56.0975	0	6.33009	0	26.3662	23.2337	9.97768	8.81351	0	9.97349	0
FASYN-INITIAL-PWY: superpathway of fatty acid biosynthesis initiation (E. coli)	452.862	215.391	291.25	328.433	278.358	315.862	293.058	264.041	221.906	252.975	286.878	372.825	365.45	373.17	249.308	263.155	209.42	219.011	250.799	296.343	305.816	330.741	303.882	247.973	364.44	377.597	286.756	402.906	255.152	413.992	437.576	251.931	346.29	565.825	272.368	272.09	337.965	426.709	283.679	241.154	401.694	244.573	158.461	245.531	294.654	187.204	156.168
FASYN-INITIAL-PWY: superpathway of fatty acid biosynthesis initiation (E. coli)|g__Campylobacter.s__Campylobacter_showae	0	6.47861	0.927041	0	0	0	0	0	0	0	0	0.805936	0	0	0	0	0.798955	0	1.70181	3.38745	0.683497	0	0	0.0566765	0	0	0	0	0	0.514809	0	0	1.03764	0	0	0.819031	0.676582	2.09545	0.785227	0	0	0	0	0	0	0	0
FASYN-INITIAL-PWY: superpathway of fatty acid biosynthesis initiation (E. coli)|g__Capnocytophaga.s__Capnocytophaga_gingivalis	0	8.84016	1.49776	0	0	0	0	0	0	0	0	3.5962	0	0	0	0	0	3.05325	0.770818	6.44108	1.07471	0	0.783955	2.20413	0	0	0	4.88116	3.58398	0.547081	0	0	1.67124	0.636048	0	0	0.91716	2.73111	3.33477	0.857586	0.406603	1.44579	0	0	0	0	0
FASYN-INITIAL-PWY: superpathway of fatty acid biosynthesis initiation (E. coli)|g__Capnocytophaga.s__Capnocytophaga_granulosa	0	1.32778	0	0	0	0	0	0	0	0	0	1.11036	0	1.02449	0	0	0	0	0	0	0	0	0	0.246869	0	0	0	0	0	0	0	0	0	0	0	0	0	0	0	0	0	0	0	0	0	0	0
FASYN-INITIAL-PWY: superpathway of fatty acid biosynthesis initiation (E. coli)|g__Cardiobacterium.s__Cardiobacterium_hominis	0	0.940925	0	0	0	0	0	0	0	0	0	0	0	0	0	0	0	0	0	0	0	0	0	0.583481	0	0	0	0	0	0.717662	0	0	0	0.319683	0	0	0.239687	0	0	0	0	0	0	0	0	0	0
FASYN-INITIAL-PWY: superpathway of fatty acid biosynthesis initiation (E. coli)|g__Eikenella.s__Eikenella_corrodens	0	0	0	0	0	0	0	0	0	0	0	0	0	0	0	0.0559576	0	0	0	0	0	0	0	0.149672	0	0	0	0	0	0	0	0	0	0	0	0	0	0	0	0	0	0	0	0	0	0	0
FASYN-INITIAL-PWY: superpathway of fatty acid biosynthesis initiation (E. coli)|g__Escherichia.s__Escherichia_coli	1.03815	0	0	0	0	0	0	0	0	0	0	0	0	0	0	0	0	0	0	0	0	0	0	0.220217	0	0	0	0	0	0	0	0	0	0	0	0	0	0	0	0	0	0	0	0	0	0	17.7304
FASYN-INITIAL-PWY: superpathway of fatty acid biosynthesis initiation (E. coli)|g__Haemophilus.s__Haemophilus_haemolyticus	0	0	0.620432	0	0	0	0.974592	0	0	0	0	0	0	0	0.430828	0	0	0	0	0.872437	0	0	0	0	0	0	0	1.76582	0	0	1.81478	0	1.94501	0.581603	0	0	0.518042	0	0.26402	0.621832	0.54508	0	0	0	0	0	0
FASYN-INITIAL-PWY: superpathway of fatty acid biosynthesis initiation (E. coli)|g__Haemophilus.s__Haemophilus_influenzae	0	0	0	0	0	5.78671	0	0	0	0	0	0	0	3.01219	0	4.06979	0	0	0	1.07593	1.19574	0	0	0	1.13927	0	0	1.80104	0	0	0.883986	0	6.20804	0.449697	0	0	0.475312	0	0	0.655994	0.377469	0.731615	0	0	0	0	0
FASYN-INITIAL-PWY: superpathway of fatty acid biosynthesis initiation (E. coli)|g__Haemophilus.s__Haemophilus_parainfluenzae	3.25747	28.4309	64.6176	23.9819	11.4991	20.9048	29.5295	13.379	22.8924	10.9504	13.5923	28.6743	12.6957	78.8271	19.7276	6.81841	10.5999	27.3473	17.6639	36.7499	29.794	12.2502	26.0719	23.5248	19.957	14.9543	8.59815	88.0929	112.407	100.522	94.6235	1.70333	25.348	155.505	12.5716	12.0276	60.6477	69.3528	64.8077	28.7734	102.36	12.7261	5.68988	28.6703	25.0434	5.32825	19.8685
FASYN-INITIAL-PWY: superpathway of fatty acid biosynthesis initiation (E. coli)|g__Haemophilus.s__Haemophilus_pittmaniae	0	0	1.4753	0	0	0	0	0	0	1.22531	0	0	0	0	0	0	0	0	0	0	0	0	0	0	0	0	0	0	0	0	0	0	0	0	0	0	0	0	0	0	0	0	0	4.73297	0	0	0
FASYN-INITIAL-PWY: superpathway of fatty acid biosynthesis initiation (E. coli)|g__Kingella.s__Kingella_oralis	0	0	0	0	0	0	0	0	0	0	0	0	0	0	0	0	0	0	0	0	0	0	0	0	0	0	0	0	0	0	0	0	0	0.558453	0	0	0	0	0	0	0	0	0	0	0	0	0
FASYN-INITIAL-PWY: superpathway of fatty acid biosynthesis initiation (E. coli)|g__Leptotrichia.s__Leptotrichia_buccalis	0	0	0	0	0	0	0	0	0	0	0	0	0	0	0	0	0	0	0	0	0	0	0	0.234598	0	0	0	0	0	0	0.540295	0	0	0	0	0	0	0	0	0	0	1.41822	0	0	0	0	0
FASYN-INITIAL-PWY: superpathway of fatty acid biosynthesis initiation (E. coli)|g__Leptotrichia.s__Leptotrichia_goodfellowii	0	0	0	0	0	0	0	1.31475	0	0	0	0	0	0	0	0	0.905645	0	0	0	0	0	0.584133	0.627767	0	0	0	0	0	0	0	0	0	0	0	0	0	0	0	0	0	0	0	0	0	0	0
FASYN-INITIAL-PWY: superpathway of fatty acid biosynthesis initiation (E. coli)|g__Neisseria.s__Neisseria_cinerea	0	0	0	0	0	0	0	0	0	0	0	0	0	0	0	0	0	0	0	0.882172	0	0	0	0	0	0	0	0	0	0	0	0	0	0	0	0	0.228518	0	0	0	0	0	0	0	0	0	0
FASYN-INITIAL-PWY: superpathway of fatty acid biosynthesis initiation (E. coli)|g__Neisseria.s__Neisseria_elongata	0	0	0	0	0	0	0	0	0	0	0	0	0	0	0	0	0	0	0	0	0	0	0	1.00201	0	0	0	0	0	0	1.21807	0	0	2.85206	0	0.923832	0	7.5225	3.38345	0.710894	0.38594	0	0	0	0	0	0
FASYN-INITIAL-PWY: superpathway of fatty acid biosynthesis initiation (E. coli)|g__Neisseria.s__Neisseria_flavescens	0	5.04709	0	1.50491	2.22944	0	1.52353	3.1007	3.67345	0	3.44573	0.990961	0	15.3501	1.02045	0	1.53156	3.05318	3.36012	6.32504	0	0.991017	2.06738	1.74195	0	9.05575	4.28161	6.26073	8.18853	7.11078	19.9554	0	4.07995	23.3066	1.82095	0	8.04253	44.101	5.74223	12.749	26.7471	4.16291	0	4.57699	0.727	0	0
FASYN-INITIAL-PWY: superpathway of fatty acid biosynthesis initiation (E. coli)|g__Neisseria.s__Neisseria_macacae	0	0	0	0	0	6.13789	0	0	0	0	1.12846	7.58524	0	0	0	0	1.31684	1.5255	2.49065	5.37559	0	0	2.27293	0.994959	0	0	3.67423	7.03057	0	0	2.85121	0	0	0	0	5.1873	2.74904	0	0	2.15876	0	0	0	3.10726	0	0	0
FASYN-INITIAL-PWY: superpathway of fatty acid biosynthesis initiation (E. coli)|g__Neisseria.s__Neisseria_meningitidis	0	0	0	0	0	0	0	0	0	0	0	0	0	0.688739	0	0	0	0	0	0	0	0	0	0	0	0	0	0	0	0	0	0	0	0	0	0	0	0	0	0	0	0	0	0	0	0	0
FASYN-INITIAL-PWY: superpathway of fatty acid biosynthesis initiation (E. coli)|g__Neisseria.s__Neisseria_sicca	1.45797	1.05692	0	1.72593	0	3.53242	0	2.00174	0	0	0.881408	6.59064	0	0	2.46666	0	1.10024	6.66229	2.56431	4.99744	2.93752	0	2.63469	1.08477	0	0	21.2586	27.7062	0	0	19.7561	1.18037	5.80882	28.2276	2.29869	2.50412	7.35138	9.32314	0	2.2239	6.19353	7.37444	2.47981	1.92975	4.11601	0	0
FASYN-INITIAL-PWY: superpathway of fatty acid biosynthesis initiation (E. coli)|g__Neisseria.s__Neisseria_sp_oral_taxon_014	0	0	0	0	0	0	0	0	0	0	0	0	0	0	0	0	0	0	0	0	0	0	0	0	0	0	0	0	0	0	0	0	0	0	0	0	0	0	0	0	1.14415	0	0	0	0	0	0
FASYN-INITIAL-PWY: superpathway of fatty acid biosynthesis initiation (E. coli)|g__Streptococcus.s__Streptococcus_sanguinis	3.14107	2.25214	28.1902	0	2.4969	43.0005	22.4411	7.5859	5.57089	11.8962	10.2758	33.0971	0	2.05991	9.8605	9.75083	3.38232	23.8252	15.0314	7.20762	10.4959	13.2466	18.9997	6.60468	0	5.78405	34.1952	19.5928	8.94991	12.3198	35.8138	4.21915	21.4932	30.8517	2.94323	9.46861	28.7866	4.92114	6.27093	30.4115	12.1966	3.26739	16.1101	8.68767	30.6382	6.42517	3.04198
FASYN-INITIAL-PWY: superpathway of fatty acid biosynthesis initiation (E. coli)|unclassified	20.362	26.442	23.2708	14.7964	19.5304	0	23.1577	23.9684	0	29.4911	12.8866	16.7494	0	6.04416	11.8657	7.18763	14.3133	12.5346	8.09948	14.5275	4.6198	16.7954	0	38.6388	14.0199	43.3878	0	0	14.8494	2.47194	10.2428	11.6839	11.0326	9.45093	26.2642	10.7175	47.8276	13.7753	5.22733	0	25.8357	23.9508	11.8765	8.51139	0	6.59427	0
FERMENTATION-PWY: mixed acid fermentation	36.0135	104.879	57.3326	60.5552	46.9615	68.3105	88.8312	71.0845	51.636	43.338	57.2699	119.052	49.4058	101.343	52.2395	59.3287	67.1124	77.935	91.2345	88.1798	116.147	55.3281	75.4803	84.7851	69.1783	65.2298	65.6436	172.429	55.1576	58.4839	112.2	42.6155	84.1415	133.544	60.1746	86.9886	126.132	161.194	49.2953	93.2852	110.894	78.9534	25.0352	51.5621	55.5632	50.3336	96.7889
FERMENTATION-PWY: mixed acid fermentation|g__Haemophilus.s__Haemophilus_influenzae	0	0	0	0	0	7.75505	0	0	0	0	0	0	0	1.54238	0	0	0	0	0	0	0	0	0.480435	0	0	0	0	0	0	0	0	0	0	0	0	0	0	0	0	0	0	0	0	0	0	0	0
FERMENTATION-PWY: mixed acid fermentation|unclassified	0	0	0	0	0	0	0	0	0	0	0	0	0	0	0	0	0	0	0	0	0	0	0	12.063	0	0	0	0	0	0	0	0	0	0	0	0	6.91473	0	0	0	0	0	0	0	0	0	0
FOLSYN-PWY: superpathway of tetrahydrofolate biosynthesis and salvage	30.1995	34.0343	0	10.7317	12.0544	51.9658	13.5637	35.8397	15.2204	15.1104	42.5746	57.1567	33.7924	43.6919	31.2713	20.3507	18.17	81.8804	62.2186	25.6811	27.5044	18.4903	43.8186	46.646	10.4901	17.9439	111.965	81.5296	55.693	14.8579	91.0309	48.0004	27.4465	36.6162	25.0358	25.6508	21.4985	55.4945	30.5149	33.2628	48.5497	59.46	57.529	35.2844	24.7488	27.6836	84.2949
FOLSYN-PWY: superpathway of tetrahydrofolate biosynthesis and salvage|g__Escherichia.s__Escherichia_coli	0	0	0	0	0	0	0	0	0	0	0	0	0	0	0	0.671861	0	0	0	0	0	0	0	0.277899	0	0	0	0	0	0	0	0	0	0	0	0	0	0	0	0	0	0	0	0	0	0	24.3627
FUC-RHAMCAT-PWY: superpathway of fucose and rhamnose degradation	5.88491	0	0	0	0	0	6.05022	3.87042	2.95863	0	2.96788	6.0225	0	5.41005	0	17.3042	5.1914	6.42013	4.32964	5.10584	11.2827	1.63108	4.02547	2.08442	0	0	2.19296	0	0	6.12126	13.2574	0	9.48385	5.65569	1.80895	1.86107	9.93546	9.86068	4.50206	5.4051	1.57083	0	0	0	9.46154	4.53567	47.3417
FUC-RHAMCAT-PWY: superpathway of fucose and rhamnose degradation|g__Escherichia.s__Escherichia_coli	0	0	0	0	0	0	0	0	0	0	0	0	0	0	0	0.157033	0	0	0	0	0	0	0	0.0550877	0	0	0	0	0	0	0	0	0	0	0	0	0	0	0	0	0	0	0	0	0	0	32.6459
FUCCAT-PWY: fucose degradation	3.25385	2.91148	0	0	1.07454	16.1731	3.9342	8.38683	11.5427	0	3.79611	3.95541	0	8.55396	0	17.7307	6.40118	3.67129	3.9299	5.89444	15.0356	3.55087	2.25946	1.8589	0	0	4.88838	11.0817	0	7.80995	13.9152	3.18721	10.9274	7.53428	4.30507	0.882994	10.5414	8.60332	3.89911	4.32582	1.03726	0.90276	1.57722	0	7.33231	2.76933	51.6379
FUCCAT-PWY: fucose degradation|g__Escherichia.s__Escherichia_coli	1.63582	0	0	0	0	0	0	0	0	0	0	0	0	0	0	0.15579	0	0	0	0	0.307344	0	0	0.422761	0	0	0	0	0	0	0	0	0	0	0	0	0	0	0	0	0	0	0	0	0	0	36.6132
FUCCAT-PWY: fucose degradation|g__Haemophilus.s__Haemophilus_influenzae	0	0	0	0	0	10.1829	0	0	1.09055	0	0	0	0	1.74705	0	7.84549	0	0	0	0	0	0	0	0	0	0	0	0	0	0	0	0	4.24905	0	0	0	0.772836	0.778417	0	0	0	0	0	0	0	0	0
FUCCAT-PWY: fucose degradation|g__Haemophilus.s__Haemophilus_parahaemolyticus	0	1.77816	0	0	0	0	0	0	0	0	0	0	0	0	0	0	0	0	0	0.490082	0	0	0	0	0	0	0	0	0	0	0	0	0	3.34863	0	0	0	0	0	0	0	0	0	0	0	0	0
FUCCAT-PWY: fucose degradation|g__Haemophilus.s__Haemophilus_paraphrohaemolyticus	0	0	0	0	0	0	0	0	0	0	0	0	0	0	0	0	0.553154	0	0	0	5.92443	0	0	0	0	0	0	3.70042	0	0	0.981613	0	1.45061	1.74675	0	0	2.47362	0	0	0	0	0	0	0	0	0	0
FUCCAT-PWY: fucose degradation|g__Haemophilus.s__Haemophilus_sputorum	0	0	0	0	0	0	2.72221	2.64709	1.03111	0	1.25931	1.81991	0	3.07304	0	0	0.553604	0.624096	1.87029	1.97045	0	0.915741	0	0.229311	0	0	0.793308	1.37329	0	2.49833	6.66826	0	1.02107	0	0	0	2.57678	4.29946	2.13743	1.96177	0.458401	0.650925	0	0	2.54588	0	1.61805
FUCCAT-PWY: fucose degradation|unclassified	0	0	0	0	0	0	0	0	0	0	0	0	0	0	0	0	0	0	0	0	0	0	0	0.565412	0	0	0	0	0	0	0	0	0	0	0	0	1.20114	0	0	0	0	0	0	0	0	0	0
GALACT-GLUCUROCAT-PWY: superpathway of hexuronide and hexuronate degradation	111.518	4.75102	3.77049	72.312	34.4865	18.982	19.6751	24.6666	14.3827	25.445	23.4412	9.97899	112.075	16.0551	24.7076	20.2697	11.4702	7.24351	6.66204	21.473	17.6755	49.2204	15.6817	21.0781	42.3044	38.9911	0	2.09434	0	24.6377	2.84746	18.6854	23.0573	1.95689	15.9182	25.1398	0.853767	6.06261	15.4015	8.10496	3.90945	10.0059	6.51743	14.0441	19.688	16.3226	32.6192
GALACT-GLUCUROCAT-PWY: superpathway of hexuronide and hexuronate degradation|g__Escherichia.s__Escherichia_coli	0	0	0	0	0	0	0	0	0	0	0	0	0	0	0	0.706681	0	0	0	0	0	0	0	0.195199	0	0	0	0	0	0	0	0	0	0	0	0	0	0	0	0	0	0	0	0	0	0	22.9773
GALACT-GLUCUROCAT-PWY: superpathway of hexuronide and hexuronate degradation|g__Prevotella.s__Prevotella_salivae	110.014	0	1.52238	68.7284	33.3136	12.0431	12.1559	19.7378	9.7915	23.072	19.0233	3.34491	105.752	12.3378	19.3189	16.7917	9.17976	2.66865	4.27493	17.4889	13.024	45.2658	11.8384	16.9902	40.6819	36.407	0	0	0	19.4161	0	13.3617	19.8067	1.09655	14.7552	22.1078	0.137673	0	12.5783	3.51869	1.80517	5.92881	3.171	11.4531	14.171	14.1583	4.98897
GALACTARDEG-PWY: D-galactarate degradation I	2.63263	0	0	0	0	0	0	0	0	0	0	0	0	0	0	0.543334	0	2.77444	0	2.4229	0	0	0	1.95481	2.32558	0	0	0	0	3.646	0	0	4.52761	0	0	3.3746	0	0	0	0	0	0	2.61769	0	0.733023	1.9079	32.8043
GALACTARDEG-PWY: D-galactarate degradation I|g__Escherichia.s__Escherichia_coli	0	0	0	0	0	0	0	0	0	0	0	0	0	0	0	0.501019	0	0	0	0	0	0	0	0.125972	0	0	0	0	0	0	0	0	0	0	0	0	0	0	0	0	0	0	0	0	0.66896	0.720866	31.8412
GALACTARDEG-PWY: D-galactarate degradation I|unclassified	0	0	0	0	0	0	0	0	0	0	0	0	0	0	0	0	0	0	0	0	0	0	0	0.365571	0	0	0	0	0	0	0	0	0	0	0	0	0	0	0	0	0	0	0	0	0	0	0
GALACTUROCAT-PWY: D-galacturonate degradation I	122.478	4.69713	3.55559	74.3474	35.2417	20.3588	20.2779	26.974	14.0762	25.7399	24.0872	10.1829	113.79	15.9356	25.5102	21.7266	13.9686	6.16284	6.48108	21.655	17.3017	50.6336	15.1035	21.5557	48.1392	41.7452	0	1.52888	0	26.0789	1.93489	22.465	24.3686	1.24582	22.323	28.3876	0.63632	6.38296	17.7187	6.59441	3.56903	11.5308	7.70599	14.7939	20.2558	18.9364	36.5058
GALACTUROCAT-PWY: D-galacturonate degradation I|g__Escherichia.s__Escherichia_coli	0	0	0	0	0	0	0	0	0	0	0	0	0	0	0	0.733753	0	0	0	0	0	0	0	0.172527	0	0	0	0	0	0	0	0	0	0	0	1.00249	0	0	0	0	0	0	0	0	0	0	25.5169
GALACTUROCAT-PWY: D-galacturonate degradation I|g__Prevotella.s__Prevotella_salivae	120.115	2.16752	1.70308	71.5558	33.5143	13.2544	16.8228	20.7048	13.2348	24.5955	19.8644	5.09419	109.9	12.4831	19.3878	15.4834	9.54149	4.22403	4.38037	17.7585	13.5035	45.6886	12.3648	17.3604	44.0823	39.4495	0	1.27849	0	20.1906	0	18.3597	19.8035	1.00159	16.821	24.7163	0.14928	2.61348	12.3924	3.8889	2.3802	6.78219	4.49487	11.3394	15.6264	16.1645	7.90248
GALLATE-DEGRADATION-I-PWY: gallate degradation II	0	0	0	0	0	0	0	0	0	0	0	0	0	0	0	0	0	0	0	0	0	0	0	0.159635	0	0	0	0	0	0	0	0	0	0	0	0	0	0	0	0	0	0	0	0	0	0	0
GALLATE-DEGRADATION-I-PWY: gallate degradation II|unclassified	0	0	0	0	0	0	0	0	0	0	0	0	0	0	0	0	0	0	0	0	0	0	0	0.155972	0	0	0	0	0	0	0	0	0	0	0	0	0	0	0	0	0	0	0	0	0	0	0
GLCMANNANAUT-PWY: superpathway of N-acetylglucosamine, N-acetylmannosamine and N-acetylneuraminate degradation	172.295	99.9733	155.961	77.3382	77.5823	182.873	141.842	102.038	108.297	118.765	96.3378	196.656	132.778	171.46	98.3449	103.102	122.18	166.258	167.464	111.653	131.536	147.311	155.743	107.351	60.9946	72.705	170.409	187.344	203.637	206.678	203.685	57.9597	145.936	260.074	83.2287	129.495	173.999	157.862	152.434	183.683	183.68	168.017	95.6424	127.188	132.64	80.888	155.23
GLCMANNANAUT-PWY: superpathway of N-acetylglucosamine, N-acetylmannosamine and N-acetylneuraminate degradation|g__Aggregatibacter.s__Aggregatibacter_actinomycetemcomitans	0	0	0	0	0	0	0	0	0	0	0	0	0	0	0	0	0	0	0	0	0	0	0	0	0	0	0	0	0	0	0	1.49134	0	0	0	0	0	0	0	0	0.535478	0	0	0	0	0	0
GLCMANNANAUT-PWY: superpathway of N-acetylglucosamine, N-acetylmannosamine and N-acetylneuraminate degradation|g__Cardiobacterium.s__Cardiobacterium_hominis	0	0.959405	0	0	0	0	0	0	0	0	0	0	0	0	0	0	0	0	0	0	0.560081	0	0.500765	0.483408	0	0	0	0	0	0.523615	0	0	0	0	0	0	0	0	0	0	0.383653	0	0	0	0	0	0
GLCMANNANAUT-PWY: superpathway of N-acetylglucosamine, N-acetylmannosamine and N-acetylneuraminate degradation|g__Escherichia.s__Escherichia_coli	0	0	0	0	0	0	0	0	0	0	0	0	0	0	0	0.208005	0	0	0	0	0	0	0	0.396868	0	0	0	0	0	0	0	0	0	0	0	0	0	0	0	0	0	0	0	0	0	0	28.5205
GLCMANNANAUT-PWY: superpathway of N-acetylglucosamine, N-acetylmannosamine and N-acetylneuraminate degradation|g__Fusobacterium.s__Fusobacterium_nucleatum	0	3.32162	0	0	0	0	0	0	2.54934	0	1.19153	3.77391	0	3.09483	1.31438	0.277626	3.25209	2.66367	1.26695	2.08364	0	0	4.83243	5.45141	0	1.94407	4.38699	0	1.45367	2.10599	7.61112	1.85616	0	1.46513	0	3.34825	1.43327	0	0.88005	1.33112	3.31799	3.82164	2.00281	1.57033	2.28429	1.57486	0
GLCMANNANAUT-PWY: superpathway of N-acetylglucosamine, N-acetylmannosamine and N-acetylneuraminate degradation|g__Fusobacterium.s__Fusobacterium_periodonticum	0	0	0	0	0	0	0	0	0	0	0	0	0	0	0	0	0	1.58555	0	4.58271	0	0	0	0	0	0	0	0	0	0	0	0	0	0	1.65826	0	1.92542	0	0	0	0	3.34743	0	0	0	0	0
GLCMANNANAUT-PWY: superpathway of N-acetylglucosamine, N-acetylmannosamine and N-acetylneuraminate degradation|g__Gemella.s__Gemella_haemolysans	0	0	0	1.77568	0	4.60705	2.20044	4.11442	2.4699	0	0	2.38069	0	1.50076	4.70071	0.615451	2.50464	1.80293	1.71827	1.58739	4.73107	1.3244	1.16327	0.0403385	0.991759	0	4.17252	3.00293	0	0.686946	1.13061	0	2.10249	3.72724	1.78235	5.19868	2.92285	0	0.805938	0.678242	0	1.70516	0	0	4.66564	0	0
GLCMANNANAUT-PWY: superpathway of N-acetylglucosamine, N-acetylmannosamine and N-acetylneuraminate degradation|g__Haemophilus.s__Haemophilus_haemolyticus	0	0	0	0	0	0	0	0	0	0	0	0	0	0	0.530594	0	0	0	0	1.00653	0	0	0	0	0	0	0	0	0	0.504071	1.1406	0	2.84568	0.550194	0	0	0.999461	0	0.37147	2.10312	0	0	0	0.873589	0	0	0
GLCMANNANAUT-PWY: superpathway of N-acetylglucosamine, N-acetylmannosamine and N-acetylneuraminate degradation|g__Haemophilus.s__Haemophilus_influenzae	0	0	0	0	0	8.49938	0	0	0	0	0	0	0	2.87764	0	4.78682	0	0	0	0	0	0	0	0	0	0	0	0	0	0	0	0	6.40265	0	0	0	0.446031	1.43415	0	0	0	0	0	0	0	0	0
GLCMANNANAUT-PWY: superpathway of N-acetylglucosamine, N-acetylmannosamine and N-acetylneuraminate degradation|g__Haemophilus.s__Haemophilus_parahaemolyticus	0	1.03299	0	0	0	0	0	0	0	0	0	0	0	0	0	0	0	0	0	0	0	0	0	0	0	0	0	0	0	0	0.644057	0	0	1.18175	0	0	0	0	0	0	0	0	0	0	0	0	0
GLCMANNANAUT-PWY: superpathway of N-acetylglucosamine, N-acetylmannosamine and N-acetylneuraminate degradation|g__Haemophilus.s__Haemophilus_parainfluenzae	5.0534	18.0553	41.5654	17.7804	9.12105	17.1917	17.9394	10.883	13.6348	10.6112	9.29589	15.6528	5.13162	56.2157	16.0636	5.23439	14.51	13.2682	15.7916	25.2368	16.718	6.81773	17.1521	18.6349	14.6299	10.7253	11.8	61.7172	99.2431	83.5776	75.2925	1.37452	16.3103	110.651	7.66837	12.7134	39.2067	41.5334	55.076	19.3771	76.5589	8.51443	0	24.9209	16.9394	5.49523	17.6922
GLCMANNANAUT-PWY: superpathway of N-acetylglucosamine, N-acetylmannosamine and N-acetylneuraminate degradation|g__Haemophilus.s__Haemophilus_paraphrohaemolyticus	0	0	0	0	0	0	0	0	0	0	0	0	0	0	0	0	0	0	0	0	4.32969	0	0	0	0	0	0	1.58343	0	0	0	0	1.22634	0.331781	0	0	0.961625	0	0	0	0	0	0	0	0	0	0
GLCMANNANAUT-PWY: superpathway of N-acetylglucosamine, N-acetylmannosamine and N-acetylneuraminate degradation|g__Haemophilus.s__Haemophilus_sputorum	0	0	0	0	0	0	0	0	0	0	0	0.925509	0	1.03486	0	0	0	0	0.859576	1.45862	0	0	0	0.155682	0	0	0	0	0	1.66842	1.33858	0	1.2762	0	0	0	1.73225	0	1.60383	0	0	0	0	0	0	0	1.18233
GLCMANNANAUT-PWY: superpathway of N-acetylglucosamine, N-acetylmannosamine and N-acetylneuraminate degradation|g__Oribacterium.s__Oribacterium_sinus	0	2.29246	2.42222	0	0	7.70305	0	1.76511	2.00062	1.34364	0	9.02944	0	12.5029	2.75626	3.0407	0	7.74963	0	0.934219	1.63543	1.54536	3.81946	0.465465	0	0.976306	3.22322	3.14337	6.2861	8.00985	4.8314	0	3.59412	4.69283	2.60833	0	7.49455	0	11.8175	7.16666	4.10016	0	8.07278	0	0	1.81633	0
GLCMANNANAUT-PWY: superpathway of N-acetylglucosamine, N-acetylmannosamine and N-acetylneuraminate degradation|g__Selenomonas.s__Selenomonas_flueggei	0	0	0	4.19577	0	0	0	0	0	0	0	0	0	0	0	0	0	0	0	0	0	1.1966	0	0.192397	0	0	0	0	0	0	0	4.14093	7.88956	0	0	0	0	0	0	0	0	0	2.49522	0	0	0	0
GLCMANNANAUT-PWY: superpathway of N-acetylglucosamine, N-acetylmannosamine and N-acetylneuraminate degradation|g__Streptococcus.s__Streptococcus_gordonii	0	0.967841	0	0	0	0	0	0	0	0	0	0	1.56188	0	1.36666	0	0	3.85203	0	0	1.07083	1.35491	2.7636	0.0589355	0	0	0	0	0	0	0	0	0.949702	1.27248	0	2.90397	0	0	0	1.09578	0	5.63767	0	3.15998	0	0	0
GLCMANNANAUT-PWY: superpathway of N-acetylglucosamine, N-acetylmannosamine and N-acetylneuraminate degradation|g__Streptococcus.s__Streptococcus_sanguinis	4.09306	1.51576	30.5596	0	0	10.8321	9.25951	7.28388	2.64386	6.44156	10.0917	26.9151	4.71971	1.87107	3.08322	0.428304	1.05115	16.3835	8.25225	1.31191	5.95188	5.23336	19.9523	2.32762	1.54013	5.93098	25.0267	13.6518	0	6.78077	1.20633	0	18.3757	23.975	0	2.10796	14.5627	4.08919	0.681124	26.7582	8.94364	2.90438	0	6.27156	21.7412	3.62809	1.4588
GLCMANNANAUT-PWY: superpathway of N-acetylglucosamine, N-acetylmannosamine and N-acetylneuraminate degradation|unclassified	0	17.1235	0	8.12035	0	0	6.68884	0	0	8.30163	0	9.80575	0	11.2157	0	1.75123	11.2577	8.04165	3.57062	13.7682	11.1962	0	0	3.49611	0	0	0	8.2942	15.147	6.87584	13.5953	6.20746	5.57915	19.3488	7.29668	5.46701	14.2444	0	11.4242	5.90846	17.4955	0	8.38701	0	0	5.65708	0
GLUCARDEG-PWY: D-glucarate degradation I	2.57511	0	0	0	0	0	0	0	0	0	0	0	0	0	3.43795	0.366826	0	0	0	0	3.73854	0	1.03559	3.93367	0	0	0	0	0	0.768151	0	0	0	0.33154	0	0	1.50043	0	0.528641	0	0.247808	0	1.66131	0.764608	1.52935	2.1625	28.7083
GLUCARDEG-PWY: D-glucarate degradation I|g__Escherichia.s__Escherichia_coli	0	0	0	0	0	0	0	0	0	0	0	0	0	0	0	0.347038	0	0	0	0	0.480855	0	0	0.323735	0	0	0	0	0	0	0	0	0	0	0	0	0	0	0	0	0	0	0	0	0.760259	0.851519	28.1393
GLUCARGALACTSUPER-PWY: superpathway of D-glucarate and D-galactarate degradation	2.63263	0	0	0	0	0	0	0	0	0	0	0	0	0	0	0.543334	0	2.77444	0	2.4229	0	0	0	1.95481	2.32558	0	0	0	0	3.646	0	0	4.52761	0	0	3.3746	0	0	0	0	0	0	2.61769	0	0.733023	1.9079	32.8043
GLUCARGALACTSUPER-PWY: superpathway of D-glucarate and D-galactarate degradation|g__Escherichia.s__Escherichia_coli	0	0	0	0	0	0	0	0	0	0	0	0	0	0	0	0.501019	0	0	0	0	0	0	0	0.125972	0	0	0	0	0	0	0	0	0	0	0	0	0	0	0	0	0	0	0	0	0.66896	0.720866	31.8412
GLUCARGALACTSUPER-PWY: superpathway of D-glucarate and D-galactarate degradation|unclassified	0	0	0	0	0	0	0	0	0	0	0	0	0	0	0	0	0	0	0	0	0	0	0	0.365571	0	0	0	0	0	0	0	0	0	0	0	0	0	0	0	0	0	0	0	0	0	0	0
GLUCONEO-PWY: gluconeogenesis I	19.4145	134.559	136.251	109.823	61.5832	45.4813	131.656	59.0623	50.9751	65.523	105.816	129.3	83.8063	126.96	82.5746	73.9007	103.533	65.8157	104.893	149.801	170.462	74.2075	71.6699	61.444	29.9475	90.1085	9.02105	122.202	60.5941	38.1607	61.5127	97.8453	181.23	50.7269	116.727	120.991	221.783	47.7277	123.958	145.804	121.989	122.878	58.058	95.7319	86.9393	92.9168	0
GLUCONEO-PWY: gluconeogenesis I|unclassified	0	0	0	0	0	0	0	0	0	0	0	0	0	5.82302	0	0	0	0	0	12.063	0	0	7.06095	0	0	0	0	15.4623	0	10.7285	0	0	0	7.57011	0	0	12.965	0	0	0	4.1177	0	0	0	0	0	0
GLUCOSE1PMETAB-PWY: glucose and glucose-1-phosphate degradation	12.5567	5.42269	11.5156	4.38203	5.01969	21.0447	4.45354	11.4295	6.66138	4.94118	6.60004	9.67143	8.07747	25.7108	9.20642	5.27021	4.40003	17.3058	12.1271	16.7586	15.8521	4.73374	10.9036	11.897	11.9517	3.082	11.8709	22.5781	37.9036	50.5462	25.6388	8.2498	8.55882	19.9535	5.492	14.2911	15.1095	53.287	21.3691	16.2356	20.466	2.07187	9.89375	14.2836	15.4745	4.10602	48.4431
GLUCOSE1PMETAB-PWY: glucose and glucose-1-phosphate degradation|g__Cardiobacterium.s__Cardiobacterium_hominis	0	0	0	0	0	0	0	0	0	0	0	0	0	0	0	0	0	0	0	0	0.757831	0	0.607694	0.388763	0	0	0	0	0	0	1.1403	0	0	0.265111	0	0	0.138151	0	0	0	0.620259	0	0	0	0	0	0
GLUCOSE1PMETAB-PWY: glucose and glucose-1-phosphate degradation|g__Escherichia.s__Escherichia_coli	1.47883	0	0	0	0	0	0	0	0	0	0	0	0	0	0	0.390885	0	0	0	0	0.573763	0	0	0.693494	0	0	0	0	0	0	0	0	0	0	0	1.03283	0	0	0	0	0	0	0	0	0	0	25.0498
GLUCOSE1PMETAB-PWY: glucose and glucose-1-phosphate degradation|unclassified	0	3.473	0	0	0	0	0	0	0	0	0	0	0	0	0	0	0	0	0	0	0	0	0	1.0205	0	0	0	0	0	0	0	0	0	2.53221	0	0	2.85942	0	0	0	0	0	0	0	0	0	0
GLUCUROCAT-PWY: superpathway of &beta;-D-glucuronide and D-glucuronate degradation	107.816	6.42869	4.26855	69.0018	31.5437	21.1356	19.8898	24.6712	14.642	26.6902	23.6312	11.7646	111.379	17.6407	26.6533	25.7255	10.5893	8.29391	7.08567	22.1047	20.5692	48.6573	19.5201	20.4611	38.2152	37.8231	1.40126	3.30783	7.68824	28.0403	6.4552	17.4362	28.1643	5.91177	13.4545	23.7593	2.13293	13.5653	18.1547	11.2224	4.93203	12.1759	6.27716	15.6747	19.2337	15.2228	29.7631
GLUCUROCAT-PWY: superpathway of &beta;-D-glucuronide and D-glucuronate degradation|g__Cardiobacterium.s__Cardiobacterium_hominis	0	0	0	0	0	0	0	0	0	0	0	0	0	0	0	0	0	0	0	0	0	0	0	0.169499	0	0	0	0	0	0	0	0	0	0	0	0	0	0	0	0	0.417299	0	0	0	0	0	0
GLUCUROCAT-PWY: superpathway of &beta;-D-glucuronide and D-glucuronate degradation|g__Escherichia.s__Escherichia_coli	0	0	0	0	0	0	0	0	0	0	0	0	0	0	0	0.689782	0	0	0	0	0	0	0	0.176456	0	0	0	0	0	0	0	0	0	0	0	0	0	0	0	0	0	0	0	0	0	0	20.4549
GLUCUROCAT-PWY: superpathway of &beta;-D-glucuronide and D-glucuronate degradation|g__Prevotella.s__Prevotella_salivae	106.328	0	1.56864	65.018	30.5747	12.0854	10.5862	18.7205	8.8156	22.714	18.3553	2.79819	103.297	13.0317	18.7658	17.9676	8.21767	2.22473	4.12405	18.3207	12.9113	43.7379	14.6957	15.6828	36.5682	34.9592	0	0	0	18.9385	0	11.8461	21.947	1.51366	12.306	20.7332	0.173927	0	12.879	4.29651	1.59841	5.68657	2.59414	11.4282	13.5151	13.0875	4.16615
GLUDEG-I-PWY: GABA shunt	0	0	0	0	0	0	0	0	0	0	0	0	4.59187	0	0	0	0	0	0	0	0	0	0	0	0	0	0	0	0	0	0	0	0	0	0	0	0	0	0	0	0	0	0	0	0	0	0
GLUTORN-PWY: L-ornithine biosynthesis	49.6557	119.839	221.564	81.7674	89.6068	190.691	49.2813	84.108	74.0442	58.6706	41.999	161.325	67.0483	114.962	79.9748	67.1579	73.4452	92.3059	84.3768	93.4624	156.866	50.1543	147.021	74.5511	67.6461	34.2021	112.756	187.388	165.3	188.358	135.727	99.9887	111.657	155.754	37.6641	111.349	92.1222	158.736	181.419	144.516	159.196	67.5014	91.2196	118.187	88.0098	187.779	185.151
GLUTORN-PWY: L-ornithine biosynthesis|g__Acidovorax.s__Acidovorax_ebreus	0	0	0	0	0	0	0	0	0	0	0	0	0	0	0	0	0	0	0	0	0	0	0	0.648624	0	0	0	0	0	0	0	0	0	0	0	0	0	0	0	0	0	0	0	0	0	0	0
GLUTORN-PWY: L-ornithine biosynthesis|g__Actinomyces.s__Actinomyces_oris	0	0	0	0	0	0	0	0	0	0	0	3.81616	0	0	0	0	0	0	0	0	0	0	1.0259	0.225928	0	0	0	0	0	0.350232	0.603352	0	0	0.942717	0	0	0	1.07124	0	0	0.432682	0	0	0	0	0	0
GLUTORN-PWY: L-ornithine biosynthesis|g__Actinomyces.s__Actinomyces_viscosus	1.02322	0	0	0	0	0	0	0	0	0	0	3.5631	0	0	0.500693	0	0	0	0	0	0.508856	0	0	1.41685	0.629798	0	2.28836	3.60908	2.19414	0.800716	0	1.2535	0	0.616481	0	0	0	0	0	0	0	0	0	0	0	0	0.993983
GLUTORN-PWY: L-ornithine biosynthesis|g__Bifidobacterium.s__Bifidobacterium_longum	0	0	0	0	0	0	0	0	0	0	0	0	0	0	0	0	0	0	0	0	0	0	0	0	0	0	0	0	0	0	0	0	0	0	0.964852	0	0	0	0	0	0	0	0	0	0	0	0
GLUTORN-PWY: L-ornithine biosynthesis|g__Enhydrobacter.s__Enhydrobacter_aerosaccus	0	0	0	0	0	0	0	0	0	0	0	0	0	0	0	0	0	0	0	0	0	0	0	0.183867	0	0	0	0	0	0	0	0	0	0	0	0	0	0	0	0	0	0	0	0	0	0	0
GLUTORN-PWY: L-ornithine biosynthesis|g__Escherichia.s__Escherichia_coli	1.07913	0	0	0	0	0	0	0	0	0	0	0	0	0	0	0.333429	0	0	0	0	0.515115	0	0	0.36933	0	0	0	0	0	0	0	0	0	0	0	0.739824	0	0	0	0	0	0	0	0	0	0	28.1779
GLUTORN-PWY: L-ornithine biosynthesis|g__Haemophilus.s__Haemophilus_parahaemolyticus	0	0	0	0	0	0	0	0	0	0	0	0	0	0	0	0	0	0	0	0	0	0	0	0	0	0	0	0	0	0	0.486475	1.82828	0	1.34838	0	0	0	0	0	0	0	0	0	0	0	0	0
GLUTORN-PWY: L-ornithine biosynthesis|g__Haemophilus.s__Haemophilus_paraphrohaemolyticus	0	0	0	0	0	0	0	0	0	0	0	0	0	0	0	0	0	0	0	0	3.53284	0	0	0	0	0	0	1.33308	0	0	0	0	1.1717	0.367456	0	0	1.58165	0	0	0.588986	0	0	0	0	0	0	0
GLUTORN-PWY: L-ornithine biosynthesis|g__Haemophilus.s__Haemophilus_sputorum	0	0	0	0	0	0	1.11653	0	0	0	0	1.82776	0	0.821038	0	0	1.03709	0	1.0309	1.38507	0	0	0	0.0942971	0	0	0	1.09252	0	1.95939	5.46873	0	0	0	0	0	1.31354	0	1.89409	0.44993	0.392198	0	0	0	0	0	0
GLUTORN-PWY: L-ornithine biosynthesis|g__Lautropia.s__Lautropia_mirabilis	0	0.838421	0.841773	0	0	0	0	0	0	0	0	5.26677	0	0.523842	0.617512	0	0	3.25451	0.770973	0.621894	3.20365	0	2.94797	0.288419	0	0	0	8.95357	5.63196	1.4534	19.4321	4.15371	1.49944	6.64021	0	0	2.51302	8.14091	11.2695	9.44565	2.83955	0	0	0	0	0	0
GLUTORN-PWY: L-ornithine biosynthesis|g__Neisseria.s__Neisseria_elongata	0	0	0	0	0	0	0	0	0	0	0	0	0	0	0	0	0	0	0	0	1.77433	0	0	0.791706	0	0	0	0	0	0	0	0	0	1.58708	0	0	0.403513	3.34908	3.22379	0.539435	0	0	0	0	0	0	0
GLUTORN-PWY: L-ornithine biosynthesis|g__Neisseria.s__Neisseria_flavescens	0	5.89959	0	2.86039	1.88008	0	0	0	0	0	1.92229	6.56934	0	8.55891	0.324999	0	1.1353	1.1488	1.87198	6.87773	0	0	2.28551	1.92362	0	8.82862	0	32.0067	3.71151	5.75884	15.1761	0	1.5104	17.5267	1.23594	0	5.9795	37.3965	2.94521	6.51774	17.0519	2.40759	0	4.59433	0	0	1.03276
GLUTORN-PWY: L-ornithine biosynthesis|g__Neisseria.s__Neisseria_macacae	0	0	0	0	0	2.18081	0	0	0	0	0	0	0	0	0	0	0.622843	1.98748	2.39505	0.895845	0.563404	0	0	0.0251937	0	0	0	1.99566	0	0	0.759587	0	0	0	0	1.00372	3.29837	1.53406	0	0	0	1.69731	0	0	0	0	0
GLUTORN-PWY: L-ornithine biosynthesis|g__Neisseria.s__Neisseria_sicca	0	1.00849	0	1.25012	0	5.94197	0	0	0	1.1664	1.11058	10.4846	3.46608	0	1.90902	0	1.72468	5.69574	3.26349	5.99319	5.16535	1.84903	3.7875	2.04042	0	1.10815	13.908	33.6142	0	0	9.94266	0	7.20257	21.6235	1.04014	3.52786	4.85609	0	0.85762	19.6797	4.6575	2.62163	1.85407	1.79926	2.64892	0	0
GLUTORN-PWY: L-ornithine biosynthesis|g__Neisseria.s__Neisseria_sp_oral_taxon_014	0	0	0	0	0	0	0	0	0	0	0	0	0	0	0	0	0	0	0	0	0	0	0	0	0	0	0	0	0	0	0	0	0	0	0	0	0	0	0	0	2.48048	0	0	0	0	0	0
GLUTORN-PWY: L-ornithine biosynthesis|g__Neisseria.s__Neisseria_subflava	0	10.0174	1.1177	0	0	0	1.36237	0	0	0	0.843467	2.92576	0	8.29957	0	0	0	1.90095	1.92042	2.24593	0	0	0	3.00315	0	0	0	9.8504	2.61771	8.55167	16.3373	0	3.27886	13.4112	0	0	0	35.0097	2.57948	5.1669	21.6202	0	0	2.42674	0	0	0
GLUTORN-PWY: L-ornithine biosynthesis|g__Streptococcus.s__Streptococcus_mutans	0	0	0	0	0	0	0	0	0	0	0	0	0	0	0	0	0	0	0	0	0	0	0	0	0	0	0	0	0	0	0	2.63933	0	0	0	1.45528	0	0	0	0	0	0	0	0	0	0	0
GLUTORN-PWY: L-ornithine biosynthesis|g__Veillonella.s__Veillonella_dispar	20.7002	1.51866	93.9595	38.2836	34.225	117.465	18.8532	33.7887	29.9267	20.6239	9.357	67.5485	25.2531	72.8914	23.5757	29.2866	19.3531	25.8543	32.6311	18.1774	96.6353	8.80203	59.8164	26.5066	41.8976	9.26722	6.87824	16.4384	90.9241	111.81	29.5698	24.5062	36.1198	60.7581	11.3853	34.8181	27.626	12.5164	70.9484	55.3358	71.6109	11.5933	42.0947	53.877	23.0424	93.2716	81.3031
GLUTORN-PWY: L-ornithine biosynthesis|g__Veillonella.s__Veillonella_parvula	4.0559	11.7939	21.593	15.9824	3.80428	17.6268	1.60229	9.30224	11.8382	15.9608	4.9266	24.4706	15.6825	1.8462	24.7255	11.3554	26.7072	23.3869	14.2152	10.4038	5.29796	9.37269	4.68514	15.9221	2.93802	3.05798	10.09	12.8185	8.43923	19.4468	10.8332	17.7316	4.42716	14.0498	3.60288	27.1563	2.18476	5.17779	18.0972	11.2649	6.57681	4.46792	7.75292	22.1232	27.2878	35.8772	12.6531
GLUTORN-PWY: L-ornithine biosynthesis|g__Veillonella.s__Veillonella_sp_6_1_27	0	0	0	0	0	0	0	0	0	0	0	0	0	0	0	0	0	0	0	0	0	0	0	0	0	0	0	0	0	0	0	0	0	1.46792	0	0	0	0	1.86191	0	0	0	0	0	0	0	0
GLUTORN-PWY: L-ornithine biosynthesis|g__Veillonella.s__Veillonella_sp_oral_taxon_158	0	0	0	0	0	0	0	0	0	0	0	0	0	0	0	0	0	0	0	0	0	0	0	0	0	0	0	0	0	0	0	0	0	0	0	0	0	0	0	0	0	18.8836	0	0	0	0	0
GLUTORN-PWY: L-ornithine biosynthesis|unclassified	0	0	7.32602	0	0	0	0	0	0	0	0	0	0	0	0	0	0	0	0	0	0	0	7.28337	2.55072	0	0	0	0	0	0	0	0	0	0	0	0	4.8765	0	0	0	0	0	0	0	0	0	0
GLYCOCAT-PWY: glycogen degradation I (bacterial)	4.76918	0	23.4363	49.3478	18.54	0	20.2481	11.8528	11.2501	22.3536	26.8617	29.4089	22.2732	11.0593	6.31901	7.10999	3.74602	2.0257	1.86964	36.9213	15.2059	46.3653	30.0272	10.6556	17.8508	11.0283	0	0	0	0	0	52.437	114.723	0	0	6.06438	0	0	25.4205	33.3449	8.94929	20.4962	35.8302	0	17.6153	20.811	51.2798
GLYCOCAT-PWY: glycogen degradation I (bacterial)|unclassified	0	0	0	0	0	0	0	0	0	0	0	0	0	0	0	5.94205	0	0	0	0	0	0	0	0	0	0	0	0	0	0	0	0	0	0	0	0	0	0	0	0	0	0	0	0	0	0	0
GLYCOGENSYNTH-PWY: glycogen biosynthesis I (from ADP-D-Glucose)	126.462	206.86	153.632	139.749	139.833	118.485	129.757	186.444	159.011	118.421	171.086	206.868	97.0428	172.601	124.823	201.34	186.248	142.944	138.731	140.289	148.199	153.905	141.5	261.868	154.744	155.227	102.414	130.06	153.722	157.752	149.241	147.165	184.615	112.74	200.67	195.317	150.572	192.945	142.017	163.97	158.695	174.243	134.355	142.289	128.812	195.861	109.716
GLYCOGENSYNTH-PWY: glycogen biosynthesis I (from ADP-D-Glucose)|g__Escherichia.s__Escherichia_coli	0	0	0	0	0	0	0	0	0	0	0	0	0	0	0	0	0	0	0	0	0.598869	0	0	0.240849	0	0	0	0	0	0	0	0	0	0	0	0.709999	0	0	0	0	0	0	0	0	0	0	26.084
GLYCOGENSYNTH-PWY: glycogen biosynthesis I (from ADP-D-Glucose)|g__Fusobacterium.s__Fusobacterium_nucleatum	0.669879	4.28428	0.689813	0	0.739331	0	1.5908	1.83008	1.79068	1.12559	2.59211	4.67287	2.9505	4.12826	1.91143	2.48572	4.09319	5.15608	6.35258	1.9117	2.16106	0.983274	6.52102	7.99936	0.549061	0.942693	5.10472	3.10479	1.12988	3.35267	8.28076	3.79943	1.3365	3.52859	0	1.14779	2.40824	12.0973	3.6906	3.51481	6.32284	4.70248	1.61891	3.12496	3.64093	2.04363	1.25073
GLYCOGENSYNTH-PWY: glycogen biosynthesis I (from ADP-D-Glucose)|g__Granulicatella.s__Granulicatella_adiacens	1.07232	1.26678	1.91073	0	0	1.84259	8.51244	0.934573	1.08144	3.9809	1.10198	0.799714	0	0	6.1381	0.620112	2.74279	4.79197	2.6851	0.645866	0.374772	4.22202	1.33493	1.79468	0	1.26514	8.05032	1.28239	0.514375	0.368287	0.575329	0	0	1.36176	1.39119	1.58388	0.128364	3.31735	0	7.18231	0.171326	3.40365	0	1.04156	2.74205	1.0086	0.498116
GLYCOGENSYNTH-PWY: glycogen biosynthesis I (from ADP-D-Glucose)|g__Lachnoanaerobaculum.s__Lachnoanaerobaculum_saburreum	0	0	0	0	0	0	0	0	0	0	0	0	0	0	0	0	0	0	0	0	0	0	0	0.0356265	0	0	0	0	0	0	0	0	0	0	0	0	0	0	0	0	0	0.397761	0	0	0	0	0
GLYCOGENSYNTH-PWY: glycogen biosynthesis I (from ADP-D-Glucose)|g__Lachnospiraceae_noname.s__Lachnospiraceae_bacterium_oral_taxon_082	0	0	0	0	1.17344	0	0	0	0	0	0	0	0	1.32692	0.213011	0.312111	0	0	0	0	2.70522	0	1.80753	1.38112	0	0	0	0	0	2.02689	0	0.966268	0.692041	0	0	0.721008	0	0	0.455301	0.467676	0.296426	0	0	0	0	0	0
GLYCOGENSYNTH-PWY: glycogen biosynthesis I (from ADP-D-Glucose)|g__Oribacterium.s__Oribacterium_sinus	1.06498	5.69887	3.01336	1.25677	0	8.62073	2.84748	0.727805	1.9253	1.74297	3.76585	11.677	0	14.5027	2.7807	3.98679	0.955815	8.24727	1.77956	1.29231	2.15327	3.58052	3.18847	0.674761	2.925	0.774304	1.56607	6.07879	6.22762	10.5936	4.7562	0.600626	2.63786	4.70852	2.96685	1.06333	10.9682	2.83953	14.277	13.1556	7.20463	1.42454	11.5462	1.38281	0	3.44491	2.66008
GLYCOGENSYNTH-PWY: glycogen biosynthesis I (from ADP-D-Glucose)|g__Peptostreptococcaceae_noname.s__Eubacterium_yurii	0	0	0	0	0	0	0	0	0	0	0	0	0	0	0	0	0	0	0	0	0	0	0	0.0162059	0	0	0	0	0	0	0	0	0	0	0	0	0	0	0	0	0	0	0	0	0	0	0
GLYCOGENSYNTH-PWY: glycogen biosynthesis I (from ADP-D-Glucose)|unclassified	0	49.4281	19.0305	10.0852	0	0	10.7673	5.33143	0	0	10.6703	11.3085	0	9.10018	3.19107	20.0394	0	11.0516	13.1278	4.35547	9.92	25.1074	6.00157	14.8316	7.51945	32.5137	17.0698	25.4836	9.38235	20.9252	0	0	40.1473	12.3761	19.9745	10.899	40.8032	0	4.93005	4.9762	19.7839	20.5786	13.634	18.345	7.78997	18.2309	8.59667
GLYCOL-GLYOXDEG-PWY: superpathway of glycol metabolism and degradation	0	0.959715	0	0	0	0	1.89316	0.8699	0	0	0.78881	2.4701	0.819983	0.405126	0	0.775314	0	1.61914	0.453626	0.831702	4.18919	0	0	1.00745	0	0	0	7.93075	0	3.25289	8.33768	0	3.43117	4.55716	0	0	3.98003	4.82836	3.54781	0.974102	0.842681	0.498281	0	1.34351	0	0	17.2921
GLYCOL-GLYOXDEG-PWY: superpathway of glycol metabolism and degradation|g__Escherichia.s__Escherichia_coli	0	0	0	0	0	0	0	0	0	0	0	0	0	0	0	0.458983	0	0	0	0	0	0	0	0.0595199	0	0	0	0	0	0	0	0	0	0	0	0	0	0	0	0	0	0	0	0	0	0	15.1985
GLYCOLYSIS-E-D: superpathway of glycolysis and Entner-Doudoroff	31.168	79.2794	42.288	40.7118	41.0137	120.343	70.712	55.473	37.3796	30.2063	75.166	132.517	45.6626	104.867	71.8308	45.8511	70.123	82.7056	79.8945	95.7335	81.3804	83.2137	102.463	66.0912	21.4991	62.7336	105.91	235.574	78.6116	109.732	201.868	30.2919	111.69	241.595	40.2418	78.4442	101.794	222.909	88.915	174.712	199.668	65.0364	57.3114	55.0892	60.2696	56.3706	91.6602
GLYCOLYSIS-E-D: superpathway of glycolysis and Entner-Doudoroff|g__Escherichia.s__Escherichia_coli	0.974979	0	0	0	0	0	0	0	0	0	0	0	0	0	0	0	0	0	0	0	0	0	0	0.260219	0	0	0	0	0	0	0	0	0	0	0	0	0	0	0	0	0	0	0	0	0	0	32.7388
GLYCOLYSIS-E-D: superpathway of glycolysis and Entner-Doudoroff|unclassified	0	0	0	0	0	0	0	0	0	0	0	0	0	0	0	0	0	0	0	0	0	0	0	2.31774	0	0	0	0	0	8.88267	0	0	0	4.40533	0	0	9.79858	0	0	0	3.32799	0	0	0	0	0	0
GLYCOLYSIS-TCA-GLYOX-BYPASS: superpathway of glycolysis, pyruvate dehydrogenase, TCA, and glyoxylate bypass	10.2262	5.54835	7.12465	2.54779	0	9.94786	6.92468	13.3425	0	0	7.13067	33.7306	7.79031	7.54592	5.06903	8.36755	2.14514	25.9519	4.26957	10.4687	19.8537	4.08105	28.4968	18.6666	0	8.02553	0	34.2036	36.6994	26.7744	78.1503	28.4963	18.9908	40.7101	0	20.7733	15.7078	30.8424	54.4053	52.256	20.7677	4.37694	7.9822	6.46736	8.3206	8.96788	70.756
GLYCOLYSIS-TCA-GLYOX-BYPASS: superpathway of glycolysis, pyruvate dehydrogenase, TCA, and glyoxylate bypass|g__Escherichia.s__Escherichia_coli	0	0	0	0	0	0	0	0	0	0	0	0	0	0	0	0	0	0	0	0	0	0	0	0.129589	0	0	0	0	0	0	0	0	0	0	0	0	0	0	0	0	0	0	0	0	0	0	0
GLYCOLYSIS: glycolysis I (from glucose 6-phosphate)	140.174	285.18	287.557	131.202	97.044	171.999	192.697	98.1687	106.502	113.318	143.611	220.235	88.3865	310.229	168.567	168.752	119.08	172.542	203.474	171.39	325.914	112.825	251.131	127.786	124.539	79.7489	290.38	325.48	387.574	392.33	364.775	82.3141	170.211	460.709	163.21	167.772	293.006	351.011	225.674	296.091	374.703	219.266	91.0676	166.91	166.584	106.71	246.979
GLYCOLYSIS: glycolysis I (from glucose 6-phosphate)|g__Escherichia.s__Escherichia_coli	1.18258	0	0	0	0	0	0	0	0	0	0	0	0	0	0	0.360607	0	0	0	0	0	0	0	0.336812	0	0	0	0	0	0	0	0	0	0	0	0	0	0	0	0	0	0	0	0	0	0	35.7998
GLYCOLYSIS: glycolysis I (from glucose 6-phosphate)|unclassified	0	44.8517	48.6355	13.5277	0	0	8.81888	0	0	0	0	13.3792	0	4.48051	9.5732	12.1939	32.9065	0	0	32.5399	0	29.6418	20.197	8.55416	0	0	6.98137	14.4353	21.797	15.8835	16.933	0	13.355	18.325	0	0	25.7449	0	4.86206	0	29.642	14.3458	0	0	0	13.8977	0
GLYOXYLATE-BYPASS: glyoxylate cycle	3.65805	1.27582	1.69812	0.607236	0	2.36295	1.65794	3.75414	0	0	1.72063	8.77857	1.95774	1.7633	1.26877	2.24135	0.491666	7.24066	0.977792	2.54988	5.06213	0.968899	7.16982	5.3126	0	1.95314	0	8.48317	10.2389	7.05281	23.0919	10.6489	4.80078	10.2698	0	5.81663	3.79393	7.78571	18.7708	14.4866	5.04903	1.00795	2.00673	1.52986	2.13945	2.35064	44.338
GLYOXYLATE-BYPASS: glyoxylate cycle|g__Acinetobacter.s__Acinetobacter_junii	0	0	0	0	0	0	0	0	0	0	0	0	0	0	0	0	0	0	0	0	0	0	0	0.100306	0	0	0	0	0	0	0	0	0	0	0	0	0	0	0	0	0	0	0	0	0	0	0
GLYOXYLATE-BYPASS: glyoxylate cycle|g__Enhydrobacter.s__Enhydrobacter_aerosaccus	0	0	0	0	0	0	0	0	0	0	0	0	0	0	0	0	0	0	0	0	0	0	0	0.178675	0	0	0	0	0	0	0	0	0	0	0	0	0	0	0	0	0	0	0	0	0	0	0
GLYOXYLATE-BYPASS: glyoxylate cycle|g__Escherichia.s__Escherichia_coli	1.9573	0	0	0	0	0	0	0	0	0	0	0	0	0	0	0.278488	0	0	0	0	0	0	0	0.236537	0	0	0	0	0	0	0	0	0	0	0	0	0	0	0	0	0	0	0	0	0	0.568855	38.7001
GLYOXYLATE-BYPASS: glyoxylate cycle|g__Lautropia.s__Lautropia_mirabilis	0	1.06059	1.30568	0	0	0	0	2.3062	0	0	0	5.01026	0	0.353849	0.443434	0.098513	0	4.65168	0	0.615562	2.02562	0	3.43509	0.515785	0	0	0	6.58228	7.83578	2.52316	17.3353	5.80973	1.02832	7.8906	0	0	2.18515	7.13982	11.932	9.70608	2.40817	0.396793	0	1.21718	0	0	0
GLYOXYLATE-BYPASS: glyoxylate cycle|unclassified	0	0	0	0	0	0	0	0	0	0	0	0	0	0	0	0	0	0	0	0	0	0	0	1.45332	0	0	0	0	0	0	0	0	0	0	0	0	0	0	0	0	0	0	0	0	0	0	0
GOLPDLCAT-PWY: superpathway of glycerol degradation to 1,3-propanediol	18.5462	20.8927	53.8665	9.83617	23.0661	102.936	42.7878	34.0897	20.5427	33.2494	25.5802	83.8337	24.6413	25.1184	37.935	49.9498	23.2148	57.4107	26.6758	34.6837	41.1455	31.4378	57.1176	34.1938	16.8201	10.4851	62.3143	28.4302	24.3318	46.4598	55.7797	23.002	58.962	66.5947	11.4527	32.4639	44.0895	17.4456	44.8242	73.5391	34.5402	35.828	47.2466	32.932	58.4349	41.5305	25.4424
GOLPDLCAT-PWY: superpathway of glycerol degradation to 1,3-propanediol|g__Streptococcus.s__Streptococcus_sanguinis	7.17294	7.73797	34.0957	3.02398	3.07284	57.3539	24.0438	11.2399	5.21998	13.8028	16.3971	41.8841	3.87007	5.26698	13.3457	12.6167	4.72158	28.4301	15.5048	6.31707	12.2313	15.9744	33.5303	6.42161	2.98798	4.08256	52.0618	17.7625	3.99963	19.8309	41.6498	4.03135	25.1232	43.7737	4.72598	8.12401	37.0373	8.45213	8.44932	44.5181	19.7346	4.234	19.3836	11.5874	30.6513	7.63448	4.4663
GOLPDLCAT-PWY: superpathway of glycerol degradation to 1,3-propanediol|unclassified	0	0	0	0	0	0	0	0	0	0	0	0	0	0	0	0	0	0	0	0	0	0	0	0.448663	0	0	0	0	0	0	0	0	0	0	0	0	0	0	0	0	0	0	0	0	0	0	0
HCAMHPDEG-PWY: 3-phenylpropanoate and 3-(3-hydroxyphenyl)propanoate degradation to 2-oxopent-4-enoate	0	0	0	0	0	0	0	0	0	0	0	0	0	0	0	0.073199	0	0	0	0	0.38201	0	0	0.160866	0	0	0	0	0	0	0	0	0	0	0	0	0	0	0	0	0	0	0	0	0	0	9.11424
HCAMHPDEG-PWY: 3-phenylpropanoate and 3-(3-hydroxyphenyl)propanoate degradation to 2-oxopent-4-enoate|g__Escherichia.s__Escherichia_coli	0	0	0	0	0	0	0	0	0	0	0	0	0	0	0	0.073199	0	0	0	0	0.38201	0	0	0.160866	0	0	0	0	0	0	0	0	0	0	0	0	0	0	0	0	0	0	0	0	0	0	9.11424
HEME-BIOSYNTHESIS-II: heme biosynthesis I (aerobic)	165.65	263.656	261.637	159.96	216.944	170.129	108.289	178.69	147.536	113.179	105.981	226.63	116.56	241.343	131.286	183.033	156.919	134.967	173.917	188.245	300.451	121.975	243.901	183.882	202.455	113.28	141.029	223.914	264.122	281.617	174.182	128.31	210.941	228.841	103.619	206.486	224.207	156.303	296.006	211.933	319.738	147.016	165.246	179.686	123.365	280.058	177.959
HEME-BIOSYNTHESIS-II: heme biosynthesis I (aerobic)|g__Acidovorax.s__Acidovorax_ebreus	0	0	0	0	0	0	0	0	0	0	0	0	0	0	0	0	0	0	0	0	0	0	0	0.52519	0	0	0	0	0	0	0	0	0	0	0	0	0	0	0	0	0	0	0	0	0	0	0
HEME-BIOSYNTHESIS-II: heme biosynthesis I (aerobic)|g__Acinetobacter.s__Acinetobacter_junii	0	0	0	0	0	0	0	0	0	0	0	0	0	0	0	0	0	0	0	0	0	0	0	0.0688633	0	0	0	0	0	0	0	0	0	0	0	0	0	0	0	0	0	0	0	0	0	0	0
HEME-BIOSYNTHESIS-II: heme biosynthesis I (aerobic)|g__Actinomyces.s__Actinomyces_sp_oral_taxon_448	0	0	0	0	0	0	0	0	0	0	0	0	0	0	2.64706	0	0	0	0	0	0	0	0	0.419992	0	0	0	0	0	0	0	0	0	0	0	0	0	0	0	0	0	0	0	0	0	0	0
HEME-BIOSYNTHESIS-II: heme biosynthesis I (aerobic)|g__Aggregatibacter.s__Aggregatibacter_segnis	0	0	0	0	0	0	0	0	0	0	0	0	0	0	0	0	0	0	3.36894	2.06529	0	0	0	0	0	0	0	0	1.38169	0	0	0	0.925665	2.24969	0	0	0	0	0	0	0	2.72391	0	0	0	0	0
HEME-BIOSYNTHESIS-II: heme biosynthesis I (aerobic)|g__Cardiobacterium.s__Cardiobacterium_hominis	0	0	0	0	0	0	0	0	0	0	0	0	0	0	0	0	0	0	0	0	0	0	0.639407	0.504678	0	0	0	0	0	0.326895	0.42534	0	0	0.365456	0	0	0.429048	0	0	0	0.63776	0	0	0	0	0	0
HEME-BIOSYNTHESIS-II: heme biosynthesis I (aerobic)|g__Corynebacterium.s__Corynebacterium_matruchotii	0	0	0	0	0	0	0	0	0	0	0	2.77074	0	0.541208	0	0	0	0	0	0	0	0	0.4489	0.235155	0	0	0	0	0.652841	0	0.961208	0	0	0	0	0	0	0	0	0	0	2.99533	0	0	0	0	0
HEME-BIOSYNTHESIS-II: heme biosynthesis I (aerobic)|g__Enhydrobacter.s__Enhydrobacter_aerosaccus	0	0	0	0	0	0	0	0	0	0	0	0	0	0	0	0	0	0	0	0	0	0	0	0.0897956	0	0	0	0	0	0	0	0	0	0	0	0	0	0	0	0	0	0	0	0	0	0	0
HEME-BIOSYNTHESIS-II: heme biosynthesis I (aerobic)|g__Haemophilus.s__Haemophilus_parahaemolyticus	0	0	0	0	0	0	0	0	0	0	0	0	0	0	0	0	0	0	0	0	0	0	0	0	0	0	0	0	0	0	1.10079	0	0	2.43853	0	0	0	0	0	0	0	0	0	0	0	0	0
HEME-BIOSYNTHESIS-II: heme biosynthesis I (aerobic)|g__Haemophilus.s__Haemophilus_parainfluenzae	0	0	13.2846	3.15443	0	16.2552	3.0395	0	0	0	8.71296	2.83602	0	11.6272	6.0702	0.11305	2.66206	2.92223	8.78831	8.88733	6.72261	4.48447	0	3.10581	17.5731	0	3.19009	0	5.64985	46.7238	17.866	1.15428	2.91393	34.8693	0	4.46265	7.34794	5.19103	11.7366	3.29538	11.4448	5.53294	0	0	0	2.33419	10.8852
HEME-BIOSYNTHESIS-II: heme biosynthesis I (aerobic)|g__Haemophilus.s__Haemophilus_paraphrohaemolyticus	0	0	0	0	0	0	0	0	0	0	0	0	0	0	0	0	0	0	0	0	4.39174	0	0	0	0	0	0	0	0	0	0	0	0	0	0	0	1.06285	0	0	0	0	0	0	0	0	0	0
HEME-BIOSYNTHESIS-II: heme biosynthesis I (aerobic)|g__Lautropia.s__Lautropia_mirabilis	0	0	0.758345	0	0	0	0	1.73959	0	0	0	8.08853	0	0	0.884045	0.919767	0	3.67175	0	0	2.76468	0	4.49022	0.303178	0	0	0	6.94796	6.94262	3.55709	14.1247	5.59853	1.82184	8.22717	0	0.749955	1.4622	11.2145	11.3022	11.8315	3.97467	0	0	0	0	0	0
HEME-BIOSYNTHESIS-II: heme biosynthesis I (aerobic)|g__Neisseria.s__Neisseria_elongata	0	0	0	0	0	0	0	0	0	0	0	0	0	0	0	0	0	0	0	0	1.31089	0	0	1.17279	0	0	0	0	0	0	0	0	0	1.02651	0	0	0	0	0.558844	0	0	0	0	0	0	0	0
HEME-BIOSYNTHESIS-II: heme biosynthesis I (aerobic)|g__Neisseria.s__Neisseria_flavescens	0	0	0	2.31407	2.63101	0	0	1.61337	1.17535	0	2.43394	2.59205	0	9.86313	0.337911	0	0.792928	2.90859	3.23281	4.65827	0	0	0.723503	1.66434	0	5.30464	1.2404	15.5847	1.2051	1.20789	2.5595	0	2.81671	15.6888	0	0	4.056	29.092	3.48001	7.30794	12.3449	2.58779	0	1.16409	0	0	0
HEME-BIOSYNTHESIS-II: heme biosynthesis I (aerobic)|g__Neisseria.s__Neisseria_macacae	0	0	0	0	0	2.6051	0	0	0	0	0	0.909946	0	0	0	0	0	1.92224	1.82952	1.53005	3.29126	0	2.49424	0	0	0	0	3.41431	0	0	3.39016	0	0	0	0	2.03746	3.73163	1.07699	0	0	0	1.14163	0	0	0	0	0
HEME-BIOSYNTHESIS-II: heme biosynthesis I (aerobic)|g__Neisseria.s__Neisseria_sicca	0	0	0	1.26796	0	2.55871	0	1.01673	0	0.999288	1.81891	16.5283	5.34359	0	1.3879	0	0	3.86511	1.77997	2.99746	2.97807	1.13145	4.5766	2.52614	0	0	9.51644	35.6967	0	0	10.0695	0	4.47867	17.2391	1.20624	1.94619	4.35736	0	0.893457	23.6875	4.75748	3.14381	1.38872	1.66805	2.72432	0	0
HEME-BIOSYNTHESIS-II: heme biosynthesis I (aerobic)|g__Neisseria.s__Neisseria_sp_oral_taxon_014	0	0	0	0	0	0	0	0	0	0	0	0	0	0	0	0	0	0	0	0	0	0	0	0	0	0	0	0	0	0	0	0	0	0	0	0	0	0	0	0	0.965751	0	0	0	0	0	0
HEME-BIOSYNTHESIS-II: heme biosynthesis I (aerobic)|g__Neisseria.s__Neisseria_subflava	0	3.93185	1.67668	0	0	0	1.95207	0	0	0	1.8918	5.44071	0	10.6	0	0	0	2.79168	1.68468	2.73294	0	0	0	2.59145	0	0	0	12.2566	5.14215	4.71132	24.1218	0	2.80769	13.0403	2.16184	0	0	18.1062	3.6538	4.41577	17.7252	0	0	0	0	0	0
HEME-BIOSYNTHESIS-II: heme biosynthesis I (aerobic)|g__Rothia.s__Rothia_dentocariosa	0	0	0	0	0	5.62499	0	0	1.87062	0	0.905084	1.39999	0	0.587386	0.388961	1.10949	2.00151	0.753612	0.860558	0	0.968848	0	5.25157	0.146505	0	0	12.3136	1.76951	0	1.35419	1.02059	6.09655	5.44585	11.5067	0	0	4.8474	0	8.32194	1.36599	0.998316	0.930075	1.53949	1.83323	0	0	0.675271
HEME-BIOSYNTHESIS-II: heme biosynthesis I (aerobic)|g__Veillonella.s__Veillonella_dispar	6.80116	1.95528	14.4563	20.5948	8.38295	15.089	2.16001	11.5721	10.5557	9.07863	0	11.958	4.856	16.8977	13.5237	5.87651	4.25542	7.60445	5.01362	8.00887	10.7755	4.18947	8.42927	6.20086	9.76949	2.134	0	7.41601	32.2117	30.668	0.783311	6.56933	8.01874	2.92254	5.90603	9.78094	4.17065	0	59.932	18.7121	25.0042	4.3834	18.0471	8.59755	4.37559	28.6733	15.7142
HEME-BIOSYNTHESIS-II: heme biosynthesis I (aerobic)|g__Veillonella.s__Veillonella_sp_oral_taxon_158	0	0	0	0	0	0	0	0	0	0	0	0	0	0	0	0	0	0	0	0	0	0	0	0	0	0	0	0	0	0	0	0	0	0	0	0	0	0	0	0	0	13.2284	0	0	0	0	0
HEME-BIOSYNTHESIS-II: heme biosynthesis I (aerobic)|g__Veillonella.s__Veillonella_sp_oral_taxon_780	0	0	0	0	0	0	0	0	0	0	0	0	0	0	2.01387	0	0	0	2.43373	0	3.49193	0	0	0	0	0	0	0	0	0	0	0	0	0	0	0	3.60516	0	3.25379	0	0	0	0	0	2.22165	0	0
HEME-BIOSYNTHESIS-II: heme biosynthesis I (aerobic)|unclassified	12.0675	40.8851	85.2713	9.25086	21.4575	23.1003	11.1675	34.118	13.5572	12.0557	6.86314	34.2155	9.33997	38.492	6.45184	14.5037	22.0858	17.7851	24.6194	27.7493	52.7047	14.4799	53.1336	12.911	30.8375	10.9298	33.309	29.7456	42.9344	39.0932	28.2556	10.972	24.4695	36.0524	0	15.9387	34.4115	13.0689	22.0758	27.9877	53.404	9.77496	0	26.9684	13.0823	47.9637	33.6582
HEMESYN2-PWY: heme biosynthesis II (anaerobic)	191.897	294.856	339.281	172.58	267.164	283.848	119.706	194.658	159.24	121.073	113.692	319.803	132.613	327.618	208.818	227.242	166.268	205.918	209.587	207.703	346.98	132.951	362.573	232.671	224.403	119.417	261.288	354.102	455.969	432.878	352.132	318.765	246.901	445.177	107.991	266.385	243.886	324.121	414.61	338.648	383.714	161.767	222.946	205.916	148.415	358.5	215.837
HEMESYN2-PWY: heme biosynthesis II (anaerobic)|g__Acidovorax.s__Acidovorax_ebreus	0	0	0	0	0	0	0	0	0	0	0	0	0	0	0	0	0	0	0	0	0	0	0	0.536546	0	0	0	0	0	0	0	0	0	0	0	0	0	0	0	0	0	0	0	0	0	0	0
HEMESYN2-PWY: heme biosynthesis II (anaerobic)|g__Actinomyces.s__Actinomyces_odontolyticus	1.09941	0	3.31186	3.84077	7.34136	2.17972	1.02257	1.07889	2.04234	3.03914	2.00702	1.94186	3.18291	4.57778	0.280364	5.31403	0.882681	2.69854	0.867362	0	1.18525	0	0	1.44473	12.0536	3.6302	0	0	11.8237	11.7948	6.34997	0	0	2.50761	1.0785	1.55492	0.648622	4.71268	6.51439	5.54268	4.41307	0	2.75272	0	0.969441	1.88505	4.73344
HEMESYN2-PWY: heme biosynthesis II (anaerobic)|g__Actinomyces.s__Actinomyces_sp_oral_taxon_448	0	0	0	0	0	0	0	0	0	0	0	0	0	0	2.89166	0	0	0	0	0	0	0	0	0.424047	0	0	0	0	0	0	0	0	0	0	0	0	0	0	0	0	0	0	0	0	0	0	0
HEMESYN2-PWY: heme biosynthesis II (anaerobic)|g__Aggregatibacter.s__Aggregatibacter_segnis	0	0	0	0	0	0	0.687984	0	0	0	1.17155	0.949722	0	0	0.201954	0	0	0	3.41678	2.6686	0	0	0.513368	0	0	0	0	0	1.54672	0	3.89234	0	0.708253	2.34709	0	0	0	0	0	0.559417	0	2.04427	0	0	0	0	0
HEMESYN2-PWY: heme biosynthesis II (anaerobic)|g__Campylobacter.s__Campylobacter_concisus	5.1508	2.50797	4.53937	6.64792	4.20782	0	4.56413	1.97254	3.71468	1.54426	1.36324	5.81388	13.041	7.52055	4.04224	1.47081	0.901051	4.3298	0	8.74506	4.09288	1.04776	2.34336	4.77659	6.67466	3.3708	5.5453	0	1.08496	2.42445	3.47527	17.3678	22.7176	2.53584	1.21562	3.11238	1.3374	3.95578	15.0612	13.2097	3.10285	1.0844	20.2898	2.79695	1.15864	1.20412	2.30025
HEMESYN2-PWY: heme biosynthesis II (anaerobic)|g__Campylobacter.s__Campylobacter_gracilis	0	0	0	0	0	0	0	0	0	0	0	0	0	0.566164	0.245805	0	0	0	0	0	0	0	0	0.500744	0	0	0	0	0	0	1.05853	0	0	0.272075	0	0	0	0	0	0.896342	0	0	0	0	0	0	0
HEMESYN2-PWY: heme biosynthesis II (anaerobic)|g__Campylobacter.s__Campylobacter_showae	0	7.28107	1.86855	0	0	0	1.96447	0	0	0	0	0	0	0	0	0	0	0	1.03732	1.66363	0	0	0	0.417463	0	0	0	0	0	0	0	0	0	0	0	0	0	0	0	0	0	0	0	0	0	0	0
HEMESYN2-PWY: heme biosynthesis II (anaerobic)|g__Capnocytophaga.s__Capnocytophaga_gingivalis	0	2.92227	0.561023	0	0	0	0	0	0	0	0	0.767298	0	0	0	0	0	1.49846	0	1.54725	1.24306	0	0	1.33542	0	0	0	1.56546	0	0	1.2754	0.999363	2.36257	1.36164	0.646914	0	0.345356	1.31061	1.63613	0	0.244835	0	0	0	0	0	0
HEMESYN2-PWY: heme biosynthesis II (anaerobic)|g__Capnocytophaga.s__Capnocytophaga_granulosa	0	1.37771	0	0	0	0	0	0	0	0	0	0	0	0	0	0	0	0	0	0	0	0	0.540552	0.0706002	0	0	0	0	0	0	0.907139	0	0	0	0	0	0	0	0	0.506728	0	0	0	0	0	0	0
HEMESYN2-PWY: heme biosynthesis II (anaerobic)|g__Capnocytophaga.s__Capnocytophaga_ochracea	0	0	0	0	0	0	0	0	0	0	0	0	0	0	0	0	0	0	1.71626	0	0.746843	0	1.70366	1.49614	0	0	0	0	0	0.445866	1.70658	1.18063	0	0	0	0	0	1.84772	0	0	0.287056	0	0	0	0	0	0
HEMESYN2-PWY: heme biosynthesis II (anaerobic)|g__Cardiobacterium.s__Cardiobacterium_hominis	0	0	0	0	0	0	0	0	0	0	0	0	0	0	0	0	0	0	0	0	0	0	0.535472	0.568181	0	0	0	0	0	0.329776	0.348997	0	0	0.588807	0	0	0.168599	0	0	0	0.732464	0	0	0	0	0	0
HEMESYN2-PWY: heme biosynthesis II (anaerobic)|g__Corynebacterium.s__Corynebacterium_matruchotii	0	0	0	0	0	0	0	0	0	0	0	2.59576	0	0	0	0	0	0	0	0	0.371897	0	0.40086	0.243366	0	0	0	0	1.70644	0	0.534724	0	0	0	0	0	0	0	0	0	0	2.63724	0	0	0	0	0
HEMESYN2-PWY: heme biosynthesis II (anaerobic)|g__Eikenella.s__Eikenella_corrodens	0	0	0	0	0	0	0	0	0	0	0	0	0	0	0	0.210557	0.558724	0	0	0	0	0	0	0	0	0	0	1.36521	0	0	0	0	0	0	0	0	0.183292	0	0	0	0	0	0	0	0	0	0
HEMESYN2-PWY: heme biosynthesis II (anaerobic)|g__Enhydrobacter.s__Enhydrobacter_aerosaccus	0	0	0	0	0	0	0	0	0	0	0	0	0	0	0	0	0	0	0	0	0	0	0	0.175845	0	0	0	0	0	0	0	0	0	0	0	0	0	0	0	0	0	0	0	0	0	0	0
HEMESYN2-PWY: heme biosynthesis II (anaerobic)|g__Escherichia.s__Escherichia_coli	0	0	0	0	0	0	0	0	0	0	0	0	0	0	0	0	0	0	0	0	0	0	0	0.167453	0	0	0	0	0	0	0	0	0	0	0	0	0	0	0	0	0	0	0	0	0	0	24.998
HEMESYN2-PWY: heme biosynthesis II (anaerobic)|g__Haemophilus.s__Haemophilus_parahaemolyticus	0	0.52193	0	0	0	0	0	0	0	0	0	0	0	0	0	0	0	0	0	0	0	0	0	0	0	0	0	0	0	0	0.858837	0	0	2.45893	0	0	0	0	0	0	0	0	0	0	0	0	0
HEMESYN2-PWY: heme biosynthesis II (anaerobic)|g__Haemophilus.s__Haemophilus_parainfluenzae	1.96768	18.7389	41.8672	15.4241	7.17498	23.5617	17.1774	15.6686	17.9337	9.30451	12.0449	12.526	8.61414	59.6567	15.0655	4.84201	10.9923	14.3923	17.1891	24.4212	19.3219	8.52936	15.5009	17.2639	20.8172	14.8347	8.95093	53.662	98.7461	96.1839	75.0387	1.17792	14.9788	91.0267	11.2442	8.15002	35.7246	53.6035	45.0884	15.4179	63.2983	6.74779	5.57691	22.3277	10.8394	5.01349	18.9128
HEMESYN2-PWY: heme biosynthesis II (anaerobic)|g__Haemophilus.s__Haemophilus_paraphrohaemolyticus	0	0	0	0	0	0	0	0	0	0	0	0	0	0	0	0	0	0	0	0	5.06561	0	0	0	0	0	0	0	0	0	0.388446	0	1.04075	1.14272	0	0	1.13675	0	0	0	0	0	0	0	0	0	0
HEMESYN2-PWY: heme biosynthesis II (anaerobic)|g__Kingella.s__Kingella_denitrificans	0	0	0	0	0	0	0	0	0	0	0	0	0	0	0	0	0	0	0	0.818088	1.67838	0	0.540068	0	0	0	0	0	0	0	0	0	0	0.339336	0	0.932658	0	0	0	0	0	0.976231	0	0	0	0	0
HEMESYN2-PWY: heme biosynthesis II (anaerobic)|g__Kingella.s__Kingella_oralis	0	0	0	0	0	0	0	0	0	0	0	0	0	0	0	0	0	0	0	0	0	0	0	0	0	0	0	0	0.746731	0	0	0	0	1.31785	0	0	0	0	0.794862	0	0	0	0	0	0	0	0
HEMESYN2-PWY: heme biosynthesis II (anaerobic)|g__Lautropia.s__Lautropia_mirabilis	0	0	0.969987	0	0	0	0	1.74853	0	0	0.983638	10.1247	0	0	1.00563	0.122604	0	3.86332	0	0	2.89878	0	5.16793	0.310205	0	0	0	12.3752	8.59055	4.92104	18.2636	7.85989	2.07638	9.40119	0	0.799858	3.2131	11.4589	12.7819	15.6085	5.14144	0	0	0.877438	1.61586	0.675734	0
HEMESYN2-PWY: heme biosynthesis II (anaerobic)|g__Neisseria.s__Neisseria_elongata	0	0	0	0	0	0	1.54681	0	0	0	0	0	0	0	0	0	0	0.773912	0	0	1.01736	0	0	0.891287	0	0	0	0	0	0	0	0	0	1.07551	0	0	0	0	0.595441	0	0	0	0	0	0	0	0
HEMESYN2-PWY: heme biosynthesis II (anaerobic)|g__Neisseria.s__Neisseria_flavescens	0	2.1197	0	2.99861	3.72492	0	0	1.55295	1.04136	0	2.4288	5.7177	0	11.0316	0.315299	0	0.602253	2.85317	3.58669	5.00031	0	0	1.99614	2.10548	0	4.94054	1.1112	32.1161	5.60146	5.57022	12.6112	0	2.90251	18.0607	0	0	6.11574	40.2781	2.34299	8.09	12.0007	2.49868	0	1.03147	0	0	0.885748
HEMESYN2-PWY: heme biosynthesis II (anaerobic)|g__Neisseria.s__Neisseria_sp_oral_taxon_014	0	0	0	0	0	0	0	0	0	0	0	0	0	0	0	0	0	0	0	0	0	0	0	0	0	0	0	0	0	0	0	0	0	0	0	0	0	0	0	0	1.53455	0	0	0	0	0	0
HEMESYN2-PWY: heme biosynthesis II (anaerobic)|g__Neisseria.s__Neisseria_subflava	0	3.91055	1.60566	0	0	0	1.30057	0	0	0	1.83316	7.48346	0	10.0911	0	0	0	1.45637	1.60593	1.9836	0	0	0	2.90645	0	0	0	13.1385	4.05288	4.69637	18.2524	0	2.73588	14.4421	0.857876	0	0	17.9503	4.75271	4.496	22.8946	0	0	0	0	0	0
HEMESYN2-PWY: heme biosynthesis II (anaerobic)|g__Rothia.s__Rothia_dentocariosa	0	0	0	0	0	2.2677	0	0	1.11725	0	0.925532	1.56645	0	0.548561	0.333003	1.71902	1.64372	0.658866	0.855648	0	0	0	4.31116	0.142363	0	0	14.7736	1.26294	0	1.11643	0	5.81135	4.958	10.3469	0	0	2.92478	0	7.2173	1.13562	0.981519	0.968978	0	1.52767	0	0	0.694811
HEMESYN2-PWY: heme biosynthesis II (anaerobic)|g__Veillonella.s__Veillonella_atypica	96.5334	0	23.4517	20.4049	119.076	48.3814	13.0175	31.4911	17.8199	10.6289	9.83336	17.8296	14.8827	32.9126	51.6861	50.9344	7.43869	9.9762	21.6029	32.6139	16.5089	36.5216	28.6953	41.2235	54.1123	11.8703	0	0	6.3374	38.1166	2.2803	82.6705	44.7138	4.60496	10.9246	103.524	0.341935	1.24461	48.0398	30.1401	7.0334	6.19466	79.6657	7.37981	21.8379	108.88	32.398
HEMESYN2-PWY: heme biosynthesis II (anaerobic)|g__Veillonella.s__Veillonella_sp_HPA0037	0	0	0	0	0	0	0	0	0	0	0	0	0	0	0	0	0	0	0	0	0	0	0	0	0	0	0	0	0	0	0	44.3597	0	0	0	0	0	0	0	0	0	0	0	0	0	0	0
HEMESYN2-PWY: heme biosynthesis II (anaerobic)|g__Veillonella.s__Veillonella_sp_oral_taxon_780	0	0	0	0	0	0	0	0	0	0	0	0	0	0	2.22371	0	0	0	2.85966	0	3.52131	0	0	0	0	0	0	0	0	0	0	0	0	0	0	0	4.28817	0	3.60959	0	0	0	0	0	2.17566	0	0
HEMESYN2-PWY: heme biosynthesis II (anaerobic)|unclassified	13.6816	51.8361	67.5179	11.3795	16.5174	0	12.8309	36.1737	24.7485	12.9053	11.4809	28.3684	13.2523	34.3953	6.3085	32.211	28.2253	17.8293	25.6514	26.813	47.6948	17.1481	37.9277	27.4504	36.3557	17.9669	28.8398	26.4867	42.9499	44.1287	22.7064	3.05956	24.1418	27.306	0	15.8248	43.5298	15.5723	20.8994	29.1149	42.1298	23.3151	0	55.7737	14.3803	42.3413	0
HEXITOLDEGSUPER-PWY: superpathway of hexitol degradation (bacteria)	42.6474	138.719	119.619	43.9408	34.9078	149.069	85.5102	45.2354	48.0625	36.3498	75.8845	87.6333	49.4095	109.601	77.5036	58.9327	53.7191	115.078	101.38	76.6502	83.501	86.5336	129.082	62.8862	40.2369	28.3365	208.852	58.1167	121.367	143	215.092	37.8126	136.165	221.28	40.0608	95.7337	118.176	127.092	102.646	209.878	160.293	112.484	78.3828	88.1013	78.6273	66.7796	101.655
HISDEG-PWY: L-histidine degradation I	77.7593	101.872	44.9086	23.7644	19.329	48.258	44.0718	27.6688	25.7549	37.732	48.5287	93.048	30.8041	74.3718	32.4748	47.3645	59.7024	61.3069	60.5377	39.5579	84.5535	53.4102	126.602	50.3365	36.8341	36.6683	103.136	71.2631	145.648	114.317	93.1042	67.8103	64.6642	96.4207	38.7474	66.3377	87.4485	77.5743	48.3388	58.4644	89.4346	91.4909	15.8755	42.7917	34.1221	51.4222	39.4968
HISDEG-PWY: L-histidine degradation I|g__Bacteroidetes_noname.s__Bacteroidetes_oral_taxon_274	0	0.636993	0	0	0	0	0	0	0	0	0.552618	0	0.834671	0	0	0	0.732338	0	1.48744	0	0	0	1.46991	0.916691	0	2.77775	0	0	0	0.615736	3.7284	0	0	0	0	0	0	2.66386	0	0	0.3989	0.841056	0	0	0.54991	0.701047	0
HISDEG-PWY: L-histidine degradation I|g__Corynebacterium.s__Corynebacterium_durum	0	0	0	0	0	0	0	0.533216	0	0	0	0	0	0	0	0	0	0	0	0	0	0	1.11055	0.19107	0	0	3.37058	0	0	0.301474	0	0	0.816876	0.402715	0	0	0	0	0	0.460242	0.109474	0	0	0	0	0	0
HISDEG-PWY: L-histidine degradation I|g__Corynebacterium.s__Corynebacterium_matruchotii	0	0.317011	0	0	0	0	0	0	0	0	0	0.717068	0	0.427764	0	0	0	0	0	0	0	0	0.361004	0.107667	0	0	0	0	0.566262	0	0.414867	0	0	0.16728	0	0	0	0	0	0.291169	0.129616	2.98928	0	0	0	0.466449	0
HISDEG-PWY: L-histidine degradation I|g__Fusobacterium.s__Fusobacterium_necrophorum	0	0	0	0	0	0	0	0	0	0	0	0	0	0	0	0	0	0	0	0	0	0	0	0	0	0	0	0	0	0	0	8.38568	0	0	0	0	0	0	0	0	0	0	0	0	0	0	0
HISDEG-PWY: L-histidine degradation I|g__Fusobacterium.s__Fusobacterium_nucleatum	0	6.20618	1.18164	1.42613	0	3.01977	1.22264	2.24032	0	0	3.86151	7.21685	2.29472	9.64849	2.69068	2.54109	3.32546	5.71836	11.1435	5.97898	2.17541	2.21659	10.8574	7.91781	0.964693	3.08806	7.70314	1.27555	4.11388	4.25761	11.6619	4.33774	3.4522	4.46543	1.04161	1.97463	2.72216	2.28173	3.68373	4.37977	6.73776	6.57202	0	3.53223	4.7146	1.32666	2.49275
HISDEG-PWY: L-histidine degradation I|g__Fusobacterium.s__Fusobacterium_periodonticum	2.33654	20.6816	9.25739	3.6692	1.67361	2.1326	5.58811	6.73069	6.50021	3.13608	13.8976	25.2295	0	11.8509	0.213572	1.80284	7.72193	11.9217	3.39657	9.52713	0.608492	7.67522	2.20053	7.55369	8.57136	7.68168	0	14.3003	45.2218	23.1034	10.0042	0	13.1803	3.87764	5.04632	1.48821	17.1998	33.425	4.56634	5.20915	17.7781	7.93223	2.28743	12.3877	2.78211	0.656584	0.699671
HISDEG-PWY: L-histidine degradation I|g__Moraxella.s__Moraxella_catarrhalis	0	0	0	0	0	0	0	0	0	0	0	0	0	0	0	0.428133	0	0	0	0	0	0	0	0	0	0	0	0	0	0	0	0	0	0	0	0	0	0	0	0	0	0	0	0	0	0	0
HISDEG-PWY: L-histidine degradation I|g__Prevotella.s__Candidatus_Prevotella_conceptionensis	0	0	0	0	0	0	0	0	0	0	0	2.26669	0	0.49401	0	0	1.19164	0	0	0	0	0	1.61081	0.21717	0	0	0	0	0	0	0	0	0	1.59091	0	0	0	0	0	0	0	2.36962	0	0	0	0	0
HISDEG-PWY: L-histidine degradation I|g__Prevotella.s__Prevotella_marshii	0	0	0	0	0	0	0	0	0	0	0	0	0	0	0	0	0	0	0	0	0	0.776311	0	0	0	0	0	0	0	0	0	0	0	0	0	0	0	0	0	0	0	2.13345	0	0	0	0	0
HISDEG-PWY: L-histidine degradation I|g__Stomatobaculum.s__Stomatobaculum_longum	0	1.43623	3.15206	0	0	0	0	0	0	0	2.25369	4.04877	0	1.11832	0	1.09136	0	1.40454	0.573219	0	0.396678	0	2.09744	0.477246	0	0	0	0	3.76944	1.37012	0	0	0.767269	1.96534	0.669927	0.809011	0	0	0.428895	0.460335	1.18052	0.915627	0.721438	0	0	0	0
HISDEG-PWY: L-histidine degradation I|g__Streptococcus.s__Streptococcus_australis	0	13.4064	2.88029	0	1.01573	0	1.96477	0	0	0	0.706423	0.821773	0	0	0	0.397674	1.12547	0	2.40102	0.567741	0	0	0	0.4212	0	0.898273	8.28408	7.01024	14.3411	2.23391	7.77444	0	0.899633	29.4948	1.29322	0	8.40226	5.42777	0	0	8.20233	0.808197	0	0.749573	0	0	0
HISDEG-PWY: L-histidine degradation I|g__Streptococcus.s__Streptococcus_cristatus	0	0.520139	0	0	0	0	0	0	0	0	0	1.43042	0	0.948464	0.30243	0	0	0.755766	0	0.466298	0	1.38996	4.16222	0	0	0	10.9493	0	0	0.686781	1.06103	0	0	1.21164	0	0	1.15647	0	0	0.808347	0.233127	4.28036	0	0	0.883685	1.57274	0
HISDEG-PWY: L-histidine degradation I|g__Streptococcus.s__Streptococcus_gordonii	0	0	0	0	1.41868	2.03828	0	0	0	0	0	0.770878	1.23527	0	1.17429	0.14916	1.01034	3.16519	0	0	1.22238	1.23514	1.56593	0.0634261	0	0	2.69533	0	0	0	0	0	0	0	0	2.42467	0.125904	0	0	0.415696	0.176634	3.24289	0	0.713962	0	2.51416	0
HISDEG-PWY: L-histidine degradation I|g__Streptococcus.s__Streptococcus_oligofermentans	0	0.693447	0	0	0	0	0	0	0	0	0	0	0	0	0	0	0	3.01885	0.516561	0	0	0	0	0	0	0	0.931379	0	0	0	2.3682	0	0	0	0	0	0.361592	0	0	0.416707	0.188692	0	0	0	0	1.0976	0
HISDEG-PWY: L-histidine degradation I|g__Streptococcus.s__Streptococcus_parasanguinis	32.9231	6.65874	2.01552	2.62727	3.82423	11.0589	4.56154	0.664142	7.27108	5.68204	2.71453	10.8885	7.89478	23.4772	6.09522	16.0669	1.72189	2.1365	7.99683	2.2357	35.3879	4.9247	54.9512	5.45065	6.4299	2.61911	18.7448	6.1025	21.7279	37.6322	5.29104	24.1946	8.30198	10.13	2.70665	22.1493	5.76353	8.20519	13.8049	9.87191	9.46751	16.2095	4.51364	1.78265	4.85531	9.48084	10.2451
HISDEG-PWY: L-histidine degradation I|g__Streptococcus.s__Streptococcus_pyogenes	0	0	0	0	0	0	0	0	0	0	0	0	0	0	0	0	0	0	0	0	0	0	0	0.240425	0	0	0	0	0	0	0	0	0	0	0	0	0	0	0	0	0	0	0	0	0	0	0
HISDEG-PWY: L-histidine degradation I|g__Streptococcus.s__Streptococcus_sanguinis	3.38962	6.05158	13.3522	1.17846	0	16.8396	8.34359	2.53496	1.35927	4.52039	2.83171	12.2729	2.89581	0.928656	7.44353	1.79066	4.33903	13.1297	11.0802	4.38429	7.00849	7.92605	10.2584	2.95941	1.09137	1.2597	10.5795	13.0499	7.35957	5.00199	21.1174	1.43459	13.0162	15.35	1.3596	1.6469	15.5758	1.83567	7.19442	12.5253	8.89694	3.46886	1.04262	4.29703	6.50897	2.5648	3.16415
HISDEG-PWY: L-histidine degradation I|unclassified	0	20.5003	0	0	0	0	0	0	0	0	7.05486	0	0	0	0	2.04529	24.6714	0	4.43137	0	0	0	0	0.952062	0	0	0	0	0	2.16128	0	0	4.82701	0	8.80074	0	18.5132	0	0	0	8.70545	8.19816	0	9.55513	0	0	0
HISTSYN-PWY: L-histidine biosynthesis	162.873	104.431	169.476	76.5905	183.404	251.966	75.3302	92.6281	67.4519	79.4711	64.2528	209.29	101.757	148.276	156.653	112.658	80.812	118.889	122.035	159.122	158.161	104.074	129.244	136.805	120.806	90.143	148.617	210.264	163.58	215.727	175.766	302.435	225.435	236.045	51.5114	196.066	80.7495	193.55	250.632	238.472	169.186	99.2879	169.761	128.513	128.245	220.302	163.28
HISTSYN-PWY: L-histidine biosynthesis|g__Acidovorax.s__Acidovorax_ebreus	0	0	0	0	0	0	0	0	0	0	0	0	0	0	0	0	0	0	0	0	0	0	0	0.841901	0	0	0	0	0	0	0	0	0	0	0	0	0	0	0	0	0	0	0	0	0	0	0
HISTSYN-PWY: L-histidine biosynthesis|g__Actinobaculum.s__Actinobaculum_sp_oral_taxon_183	0	0	0	0	0	0	0	0	0	0	0	0	0	0	0	0	0	0	0	0	0	0	0	0.163922	0	0	0	0	0	0	0	0	0	0	0	0	0	0	0	0	0	0	0	0	0	0	0
HISTSYN-PWY: L-histidine biosynthesis|g__Actinomyces.s__Actinomyces_massiliensis	0	0	0	0	0	0	0	0	0	0	0	0	0	0	0	0	0	0	0	0	0	0	0	0.230215	0	0	0	0	0	0.720135	0	0	0	0	0	0	0	0	0	0	0	0	0	0	0	0	0
HISTSYN-PWY: L-histidine biosynthesis|g__Actinomyces.s__Actinomyces_naeslundii	0	0	0	0	0	0	0	0	0	0	0	0	0	0	0	0	0.803285	0	0	0	0	0	0	1.28204	0	0	0	0	0	0	0	0	0	0	0	0	0	0	1.05582	0	0	0	0	0	0	0	0
HISTSYN-PWY: L-histidine biosynthesis|g__Actinomyces.s__Actinomyces_sp_oral_taxon_448	0	0	0	0	0	0	0	0	0	0	0	0	0	0	3.5925	0	0	0	0	0	0	0	0	0	0	0	0	0	0	0	0	0	0	0	0	0	0	0	0	0	0	0	0	0	0	0	0
HISTSYN-PWY: L-histidine biosynthesis|g__Actinomyces.s__Actinomyces_viscosus	0	0	0	0	0	0	0	0	0	0	0	0	0	0	0	0	0	0	0	0	0	0	0	0.783788	0	0	0	0	2.91768	0	0	0	0	1.81235	0	0	0	0	0	0	0	0	0	0	0	0	0
HISTSYN-PWY: L-histidine biosynthesis|g__Corynebacterium.s__Corynebacterium_matruchotii	0	0	0	0	0	0	0	0	0	0	0	1.80602	0	0	0	0	0	0	0	0	0	0	0	0.0901152	0	0	0	0	0	0	0	0	0	0	0	0	0	0	0	0	0	5.2218	0	0	0	0	0
HISTSYN-PWY: L-histidine biosynthesis|g__Escherichia.s__Escherichia_coli	0	0	0	0	0	0	0	0	0	0	0	0	0	0	0	1.19681	0	0	0	0	0	0	0	0.100521	0	0	0	0	0	0	0	0	0	0	0	0	0	0	0	0	0	0	0	0	0	0.855187	20.8763
HISTSYN-PWY: L-histidine biosynthesis|g__Haemophilus.s__Haemophilus_influenzae	0	0	0	0	0	8.20161	0	0	0	0	0	0	0	1.80246	0	4.43918	0	0	0	0	0	0	0	0	0	0	0	0	0	0	0	0	6.90027	0	0	0	0.1841	2.41932	0	0	0	0	0	0	0	0	0
HISTSYN-PWY: L-histidine biosynthesis|g__Lautropia.s__Lautropia_mirabilis	0	0	0	0	0	0	0	3.012	0	0	0	8.30613	0	0	0	0	0	4.22553	0	0	3.40132	0	0	0.360268	0	0	0	13.267	4.30599	1.13585	15.8522	6.03217	0	5.71256	0	0	1.16318	9.93612	8.4041	3.99114	2.77819	0	0	0	0	0	0
HISTSYN-PWY: L-histidine biosynthesis|g__Neisseria.s__Neisseria_elongata	0	0	0	0	0	0	0	0	0	0	0	0	0	0	0	0	0	0	0	0	0	0	0	0.797836	0	0	0	0	0	0	0	0	0	2.10569	0	0	0	0	2.22488	0	0	0	0	0	0	0	0
HISTSYN-PWY: L-histidine biosynthesis|g__Neisseria.s__Neisseria_flavescens	0	0	0	3.30994	0	0	0	2.67255	0	0	0	2.96349	0	9.87625	0	0	0	0	0	0	0	0	0	2.97609	0	11.9213	0	0	4.51536	5.54575	12.9838	0	0	13.5827	0	0	3.75742	8.26376	0.797688	7.68577	13.1617	0	0	0	0	0	0
HISTSYN-PWY: L-histidine biosynthesis|g__Neisseria.s__Neisseria_macacae	0	0	0	0	0	0	0	0	0	0	0	2.65174	0	0	0	0	0	0	0	0	0	0	0	0.1506	0	0	3.87316	4.87899	0	0	2.63354	0	0	0	0	0	1.93588	0	0	2.47735	0	0	0	0	0	0	0
HISTSYN-PWY: L-histidine biosynthesis|g__Neisseria.s__Neisseria_sicca	0	0	0	0	0	5.52207	0	0	0	0	0	4.79693	2.55483	0	1.27942	0	2.07124	6.23297	5.19785	5.44343	5.43615	2.03984	5.17964	2.03805	0	0	15.675	25.9948	0	0	12.3901	0	6.32541	21.6137	0	2.30225	4.59387	0	0	16.5634	6.07272	3.80989	0	0	1.84549	0	0
HISTSYN-PWY: L-histidine biosynthesis|g__Neisseria.s__Neisseria_sp_oral_taxon_014	0	0	0	0	0	0	0	0	0	0	0	0	0	0	0	0	0	0	0	0	0	0	0	0	0	0	0	0	0	0	0	0	0	0	0	0	0	0	0	0	2.91949	0	0	0	0	0	0
HISTSYN-PWY: L-histidine biosynthesis|g__Neisseria.s__Neisseria_subflava	0	7.23488	0	0	0	0	0	0	0	0	0	6.3279	0	11.4155	0	0	0	0	6.27765	4.52755	0	0	0	4.41046	0	0	2.20001	27.5627	3.86271	10.1793	18.9478	0	0	15.5376	0	0	0	42.3644	4.92823	5.36023	23.3059	0	0	0	0	0	0
HISTSYN-PWY: L-histidine biosynthesis|g__Propionibacterium.s__Propionibacterium_propionicum	0	0	0	0	0	0	0	0	0	0	0	0	0	0	0	0	0	0	0	0	0	0	0	0.541948	0	0	0	0	0	0	0	0	0	0	0	0	0	0	0	0	0	0	0	0	0	0	0
HISTSYN-PWY: L-histidine biosynthesis|g__Streptococcus.s__Streptococcus_salivarius	0	0	0	0	0	0	0	0	0	0	0	0	0	5.22424	0	0	0	0	0	0	2.73757	0	4.58085	0.922394	0	0	11.828	0	0	6.25117	0	17.8726	0	1.01425	0	0	0.758479	0	0	0	1.60419	0	0	0	2.53997	2.82618	0
HISTSYN-PWY: L-histidine biosynthesis|g__Streptococcus.s__Streptococcus_sanguinis	4.76858	5.63534	26.2344	0	0	32.6148	10.6849	2.52625	0	0	0	29.1528	0	0	8.36375	5.2536	3.71443	19.4218	9.24696	4.28271	7.06625	6.37679	14.3575	4.14321	2.86286	4.41687	22.6928	19.4207	5.20222	9.86997	23.9929	0	17.6666	26.918	0	8.23564	21.2208	6.06894	6.92227	24.0868	12.1466	6.94513	5.56475	6.11939	21.4301	4.9967	3.64281
HISTSYN-PWY: L-histidine biosynthesis|g__Veillonella.s__Veillonella_atypica	73.6779	7.80714	19.2667	26.5731	99.6205	51.9183	8.99042	26.5854	21.3357	12.9304	9.56612	18.6324	23.7807	42.442	45.8112	43.9664	8.34138	16.7434	21.9461	28.9309	19.0823	37.1929	33.3388	36.9712	53.5237	12.005	0	0	7.24916	41.6644	0	102.301	49.3626	6.44319	7.50868	94.7406	0.448138	0	46.4155	46.5744	9.002	16.5455	76.2499	6.12919	20.8703	100.574	25.5723
HISTSYN-PWY: L-histidine biosynthesis|g__Veillonella.s__Veillonella_dispar	5.50152	0	20.0632	0	0	32.0087	7.62552	0	0	10.043	0	10.4885	0	10.5835	5.17931	0	3.80423	1.73435	3.28232	0	13.2253	0	0	4.7274	1.68749	0	0	0	9.34593	7.4396	0	1.83875	3.61447	11.8429	5.78813	4.51216	0.351953	0	64.8704	33.6862	23.025	5.39546	5.12772	20.1755	5.21486	2.04311	30.9345
HISTSYN-PWY: L-histidine biosynthesis|g__Veillonella.s__Veillonella_parvula	0	9.72635	18.5384	13.2931	4.33889	9.0967	2.1924	10.4792	0	7.53611	0	0	6.86936	0	22.7589	11.6423	19.9338	13.8724	12.1838	9.91739	3.06519	2.14216	3.94453	12.0677	0	3.44567	10.6551	8.65309	0	16.581	9.27184	17.3374	0	11.2611	0	24.4459	0.979834	6.30665	10.7583	9.35103	5.43928	5.01416	5.37708	23.4321	21.0844	27.5618	10.8805
HISTSYN-PWY: L-histidine biosynthesis|g__Veillonella.s__Veillonella_sp_6_1_27	0	0	0	0	0	0	0	0	0	0	0	0	0	0	0	0	0	0	0	0	0	0	0	0	0	0	0	0	0	0	0	0	0	0	0	0	0	0	2.35702	0	0	0	0	0	0	0	0
HISTSYN-PWY: L-histidine biosynthesis|g__Veillonella.s__Veillonella_sp_HPA0037	0	0	0	0	0	0	0	0	0	0	0	0	0	0	0	0	0	0	0	0	0	0	0	0	0	0	0	0	0	0	0	40.6031	0	0	0	0	0	0	0	0	0	0	0	0	0	0	0
HISTSYN-PWY: L-histidine biosynthesis|unclassified	0	21.4345	30.7817	0	9.99051	25.2088	5.58043	9.92943	0	5.07974	4.90632	20.5395	0	11.1061	16.3139	6.81408	3.41457	7.55163	4.32032	14.0639	22.7602	4.56943	6.38846	7.28471	6.47466	18.8373	0	0	34.6104	34.2198	5.66905	0	23.9747	23.4588	0	5.51905	12.1556	10.4535	22.2007	7.94234	16.1822	6.91119	13.8524	19.6271	5.81184	19.3169	24.3081
HOMOSER-METSYN-PWY: L-methionine biosynthesis I	154.177	172.179	211.865	148.615	95.5318	216.377	152.235	145.134	105.035	137.542	97.6565	253.808	181.835	216.179	168.868	127.673	115.284	128.288	166.451	150.958	259.687	136.634	241.964	122.921	163.665	91.8005	301.877	189.567	210.327	265.074	235.394	199.22	214.739	296.335	120.154	201.544	184.003	188.288	226.554	281.466	167.418	172.945	131.256	143.643	165.105	166.808	157.319
HOMOSER-METSYN-PWY: L-methionine biosynthesis I|g__Escherichia.s__Escherichia_coli	0	0	0	0	0	0	0	0	0	0	0	0	0	0	0	0	0	0	0	0	0	0	0	0.0137685	0	0	0	0	0	0	0	0	0	0	0	0.606223	0	0	0	0	0	0	0	0	0	0	8.16845
HOMOSER-METSYN-PWY: L-methionine biosynthesis I|g__Leptotrichia.s__Leptotrichia_buccalis	0	0	0	0	0	0	0	0	0	0	0	0	0	0	0	0	0	0	0	0	0	0	0	0.39189	0	0	0	0	0	0	0.932985	0	0	0	0	0	0	0	0	0	0	1.50648	0	0	0	0	0
HOMOSER-METSYN-PWY: L-methionine biosynthesis I|g__Leptotrichia.s__Leptotrichia_shahii	0	0	0	0	0	0	0	0	0	0	0	0	0	0	0.282622	0	0	0	0	0.752755	0	0	0	0.137095	0	0	0	0	0	0	0	0	0	0	0	2.14518	0	0	0	0.324852	0	0	0	0	0	0	0
HOMOSER-METSYN-PWY: L-methionine biosynthesis I|g__Oribacterium.s__Oribacterium_sinus	1.71005	2.29385	4.71916	0	1.44982	11.4549	0	2.91224	3.42423	2.83132	3.09832	12.539	2.6935	14.1627	4.74239	3.92734	1.0373	9.92092	2.08591	2.05705	3.87052	5.73942	4.19893	0.930721	1.73885	0	1.96634	3.5447	5.08319	11.3781	6.55164	0	9.67635	3.86397	2.35735	2.88613	8.64957	2.18612	15.2992	10.8399	7.3183	4.56012	13.255	1.72277	0	8.19447	5.18444
HOMOSER-METSYN-PWY: L-methionine biosynthesis I|g__Selenomonas.s__Selenomonas_flueggei	0	0	0	3.71499	0	0	0	0	0	0	0	0	0	0	0.249931	0	0	0	0	1.00221	0	0	0	0.419778	0	0	0	0	0	0	0	0	6.05942	0	0	0	0	0	0	0.569254	0.227617	0.599233	0	0	0	0	0
HOMOSER-METSYN-PWY: L-methionine biosynthesis I|g__Streptococcus.s__Streptococcus_infantis	0	7.52432	3.12394	2.4895	0	5.78279	5.93308	1.53992	2.88795	0	2.12046	11.1901	0	11.08	1.66646	2.64269	1.42118	0.765071	7.46504	2.55422	9.49105	2.54576	7.86926	1.18725	0.765491	1.88877	4.68917	4.71357	10.7396	3.2252	13.723	0	3.40287	8.3868	5.48217	0.512084	4.30926	6.443	3.69864	16.4415	7.20506	5.32307	4.31339	0.748747	0.796921	3.29215	1.7518
HOMOSER-METSYN-PWY: L-methionine biosynthesis I|g__Streptococcus.s__Streptococcus_mitis_oralis_pneumoniae	8.30175	31.531	17.8329	5.29504	6.73911	38.2682	36.1594	23.289	20.6253	34.8867	15.2212	61.6264	14.4054	24.397	40.5908	23.26	27.0034	26.1012	42.0504	18.5989	56.1728	14.9808	29.2573	4.73572	9.44766	8.1008	82.379	61.0304	14.4865	7.90923	71.0651	24.4249	34.5723	88.7473	19.0012	21.2717	38.5334	34.5922	32.2777	93.5276	18.2798	44.1261	28.191	3.99638	18.5137	13.814	6.66951
HOMOSER-METSYN-PWY: L-methionine biosynthesis I|g__Streptococcus.s__Streptococcus_sanguinis	1.46871	2.56806	23.0141	1.29159	0.945181	12.1554	13.7439	4.62583	3.94346	6.03124	6.2848	15.6333	0	1.4849	4.62084	4.83995	2.14149	12.425	11.9433	5.94354	6.11806	5.56247	13.1397	1.69241	2.82141	2.07722	15.5775	19.4102	0	5.38827	11.58	2.51258	10.5738	24.3344	1.98262	2.57846	17.6842	4.03817	5.24656	18.0602	10.8056	3.8433	9.8202	7.41062	21.9457	2.81176	0.702815
HOMOSER-METSYN-PWY: L-methionine biosynthesis I|g__Streptococcus.s__Streptococcus_tigurinus	0	0	0	0	0	2.73569	0	0	0	0	0	0	0	0	2.60635	0	0.723484	1.17703	0	0	1.7718	2.00949	0	0	0	0	5.32372	3.11797	0	0	0.872642	0	0.762898	0	0	0	2.42168	0	0	6.22888	0	0	0	0	1.23523	0	0
HOMOSER-METSYN-PWY: L-methionine biosynthesis I|unclassified	21.3052	54.1638	20.8605	22.9163	9.25376	0	18.1157	14.0487	19.4515	0	14.4067	23.2399	17.7875	32.0392	16.5412	13.8839	2.89111	15.1228	6.42564	30.5666	33.3991	22.2032	27.1188	15.4245	23.1361	17.754	20.0797	17.4156	40.6412	37.158	22.7638	26.6618	64.188	17.8009	31.6611	42.3377	29.3466	8.47729	22.1218	27.3301	31.3851	12.0662	17.7804	20.4818	10.5238	8.22914	13.7121
HSERMETANA-PWY: L-methionine biosynthesis III	148.729	196.15	169.564	137.853	88.0413	174.858	102.488	134.101	102.984	116.822	104.823	216.55	170.089	198.456	137.738	121.031	110.207	106.339	116.184	133.413	195.229	135.429	217.177	127.348	152.525	90.3738	243.471	219.633	240.561	215.789	219.74	145.718	190.058	275.135	112.645	157.662	173.583	202.844	201.596	223.252	185.591	150.385	95.1294	140.219	141.15	138.048	109.408
HSERMETANA-PWY: L-methionine biosynthesis III|g__Acidovorax.s__Acidovorax_ebreus	0	0	0	0	0	0	0	0	0	0	0	0	0	0	0	0	0	0	0	0	0	0	0	0.784213	0	0	0	0	0	0	0	0	0	0	0	0	0	0	0	0	0	0	0	0	0	0	0
HSERMETANA-PWY: L-methionine biosynthesis III|g__Actinomyces.s__Actinomyces_massiliensis	0	0	0	0	0	0	0	0	0	0	0	0.722479	0	0	0	0	0	0	0	0	0	0	0	0.322513	0	0	0	0	2.20738	0.4399	0.642594	0	0	0	0	0	0	0	0	0	0	0	0	0	0	0	0
HSERMETANA-PWY: L-methionine biosynthesis III|g__Campylobacter.s__Campylobacter_showae	0	8.57105	0	0	0	0	0	0	0	0	0	0.558769	0	0	0	0	0.460207	0.494841	2.00356	3.58263	0	0	0	0.320449	0	0	0	0	0.650869	0.742944	0	0	0.947309	0.551952	0	0	0.511489	1.23431	0.143232	0	0.482977	0.612496	0.735847	0	0	0	0
HSERMETANA-PWY: L-methionine biosynthesis III|g__Selenomonas.s__Selenomonas_flueggei	0.623041	0	0	4.26825	0	0	0	0	0	0	0	1.74273	1.16322	0	0.37399	0	0	0	0	1.11762	0	0	0	0.522431	0	0	0	0	0	0	0	0	8.28003	0	0	0	0	0	0.798744	1.25727	0.274413	0.758707	0	0	0	0	0
HSERMETANA-PWY: L-methionine biosynthesis III|unclassified	23.535	61.166	20.4899	23.614	9.58609	0	19.1734	9.68802	21.5183	0	18.851	34.7701	17.8758	23.8692	14.3007	14.5636	19.3301	16.032	7.65091	28.3704	29.169	25.1973	29.0416	16.4403	23.6447	19.0172	0	22.9635	34.8909	34.0254	18.9791	21.7381	51.682	20.1865	30.6012	34.4685	27.7198	7.69314	24.9352	24.5868	30.1127	8.63241	14.244	22.3262	10.413	8.13501	17.2946
ILEUDEG-PWY: L-isoleucine degradation I	0	0	0	0	0	0	0	0	0	0	0	0	0	0	0	0	0	0	0	0	0	0	0	0.242602	0	0	0	0	0	0	0	0	0	0	0	0	0	0	0	0	0	0	0	0	0	0	0
ILEUSYN-PWY: L-isoleucine biosynthesis I (from threonine)	476.687	547.759	520.028	378.124	406.606	512.352	309.802	346.108	287.294	503.258	275.938	651.521	391.113	552.382	392.249	392.723	357.305	394.955	407.025	397.711	622.298	438.742	629.421	402.958	450.252	273.251	566.452	614.701	652.213	691.751	576.453	604.598	564.259	733.03	276.747	474.014	476.019	520.501	562.792	648.487	567.414	439.112	409.956	340.363	431.226	474.385	379.82
ILEUSYN-PWY: L-isoleucine biosynthesis I (from threonine)|g__Acidovorax.s__Acidovorax_ebreus	0	0	0	0	0	0	0	0	0	0	0	0	0	0	0	0	0	0	0	0	0	0	0	1.36493	0	0	0	0	0	0	0	0	0	0	0	0	0	0	0	0	0	0	0	0	0	0	0
ILEUSYN-PWY: L-isoleucine biosynthesis I (from threonine)|g__Bifidobacterium.s__Bifidobacterium_longum	0	0	0	0	0	0	0	0	0	0	0	0	0	0	0	0	0	0	0	0	0	0	0	0	0	0	0	0	0	0	0	0	0	0	1.45544	0	0	0	0	0	0	0	0	0	0	0	0
ILEUSYN-PWY: L-isoleucine biosynthesis I (from threonine)|g__Campylobacter.s__Campylobacter_gracilis	0	0	0	0	0	0	0	0	0	0	0	0	0	0	0	0	0	0	0	0.852384	0	0	0	1.15317	0	0	0	0	0	0	0	0	0	0	0	0	0	0	0	0.631656	0	0	0	0	0	0	0
ILEUSYN-PWY: L-isoleucine biosynthesis I (from threonine)|g__Campylobacter.s__Campylobacter_rectus	0	0	0	0	0	0	0	0	0	0	0	0	0	0	0	0	0	0	0	0	0	0	2.13715	0	0	0	0	0	0	0	0	0	0	0	0	0	0	0	0	0	0	0	0	0	0	0	0
ILEUSYN-PWY: L-isoleucine biosynthesis I (from threonine)|g__Campylobacter.s__Campylobacter_showae	0	7.63914	2.15262	1.00415	0	0	0	0	0	0	0	2.08127	0	0	0	0	0	0	3.41626	5.97981	1.95728	0	0	0.425678	0	0	0	0	0	1.30032	0.691082	0	2.61377	1.27824	0	0	0.764721	0	1.85202	0	0	1.07376	0	0	0	0	0
ILEUSYN-PWY: L-isoleucine biosynthesis I (from threonine)|g__Cardiobacterium.s__Cardiobacterium_hominis	0	0	0	0	0	0	0	0	0	0	0	0	0	0	0	0	0	0	0	0	0	0	0.394533	0.642035	0	0	0	0	0	0	0.587097	0	0	0	0	0	0.163911	0	0	0	0.227509	0	0	0	0	0	0
ILEUSYN-PWY: L-isoleucine biosynthesis I (from threonine)|g__Centipeda.s__Centipeda_periodontii	0	0	0	0	0	0	0	0	0	0	0	0	0	0	0	0	0	0	1.57311	0	0	0	0	0	0	0	0	0	0	0	0	0	0	0	0	0	0	0	0	0	0	0	0	0	0	0.563633	0
ILEUSYN-PWY: L-isoleucine biosynthesis I (from threonine)|g__Corynebacterium.s__Corynebacterium_durum	0	0	0	0	0	0	0	0	0	0	0	0	0	0	0	0	0	0	0	0	0	0	0.957811	0.331769	0	0	2.0232	0	0	0	0	0	0	0	0	0	0	0	0	0	0	0	0	0	0	0	0
ILEUSYN-PWY: L-isoleucine biosynthesis I (from threonine)|g__Corynebacterium.s__Corynebacterium_matruchotii	0	0	0	0	0	0	0	0	0	0	0	0	0	0	0	0	0	0	0	0	0	0	0	0.174746	0	0	0	0	2.09077	0	2.32378	0	0	0	0	0	0	0	0	0	0	4.673	0	0	0	0	0
ILEUSYN-PWY: L-isoleucine biosynthesis I (from threonine)|g__Enhydrobacter.s__Enhydrobacter_aerosaccus	0	0	0	0	0	0	0	0	0	0	0	0	0	0	0	0	0	0	0	0	0	0	0	0.156319	0	0	0	0	0	0	0	0	0	0	0	0	0	0	0	0	0	0	0	0	0	0	0
ILEUSYN-PWY: L-isoleucine biosynthesis I (from threonine)|g__Escherichia.s__Escherichia_coli	0	0	0	0	0	0	0	0	0	0	0	0	0	0	0	0.861036	0	0	0	0	0	0	0	0.370114	0	0	0	0	0	0	0	0	0	0	0	0	0	0	0	0	0	0	0	0	0	0	33.7829
ILEUSYN-PWY: L-isoleucine biosynthesis I (from threonine)|g__Fusobacterium.s__Fusobacterium_nucleatum	0	4.29734	0	1.39991	0	2.35012	0	2.34964	0	0	2.2668	5.79602	0	2.22925	1.04136	1.3152	8.39775	9.12636	11.2805	3.94808	2.92852	0	3.89255	4.29942	0	0	3.15775	4.34579	3.43237	1.03446	4.43481	0	2.00419	4.53625	0	0	2.53375	1.58887	4.42534	0.986621	2.92409	8.77521	0	1.45884	3.35845	1.06884	0
ILEUSYN-PWY: L-isoleucine biosynthesis I (from threonine)|g__Fusobacterium.s__Fusobacterium_periodonticum	2.39372	39.2518	14.9696	3.97475	5.94583	3.65596	12.9293	16.5484	8.3427	7.3351	23.2027	50.8228	2.8984	23.0294	0.490944	4.10806	17.7328	16.2955	10.5158	14.9132	4.58031	15.5321	8.84238	11.4413	13.958	11.0953	1.67872	22.0273	79.6839	39.6245	22.3429	0	25.2138	7.66769	9.4039	3.52194	33.6817	53.765	8.1515	8.9224	35.1308	14.6001	8.13547	19.3588	5.05997	3.64605	1.74192
ILEUSYN-PWY: L-isoleucine biosynthesis I (from threonine)|g__Lachnoanaerobaculum.s__Lachnoanaerobaculum_saburreum	0	0	0	0	0	0	0	0	0	0	0	0.744901	0	0	0.454315	0	0	0	0	0	0	0	0	0	0	0	0	0	0	0	0	0	0	0	0	0	0	0	0	0.260079	0	0	0	0	0	0	0
ILEUSYN-PWY: L-isoleucine biosynthesis I (from threonine)|g__Lachnospiraceae_noname.s__Lachnospiraceae_bacterium_ICM7	0	3.54387	14.4122	0	0	0	1.84462	0	0	0	0.9681	3.40211	0	1.35021	0	0	0	1.43557	2.34219	1.3598	0	0	1.39881	0.482945	1.62534	0	0	0	4.6125	2.67579	0.613818	0	1.00509	2.61978	0	0	4.35623	1.57098	0.859405	2.87159	5.42778	1.57577	0	3.09496	0	0	0
ILEUSYN-PWY: L-isoleucine biosynthesis I (from threonine)|g__Lachnospiraceae_noname.s__Lachnospiraceae_bacterium_oral_taxon_082	0	0	0	0	0	0	0	0	0	0	0	1.02925	0	1.23543	0	0	0	0	0	0	1.53156	0	1.5335	1.62797	0	0	0	0	0	2.28201	0	0.719324	1.85116	0	0	0	0	0	1.11911	1.0997	1.13567	0	0	0	0	0	0
ILEUSYN-PWY: L-isoleucine biosynthesis I (from threonine)|g__Lachnospiraceae_noname.s__Lachnospiraceae_oral_taxon_107	0	0	0	0	0	0	0	0	0	0	0	0	0	0	0	0	0	0	0	0	0	0	0	0	0	0	0	0	0	0	0.498981	0	0	0	0	0	0	0	0	0.79073	0	0	0	0	0	0	0
ILEUSYN-PWY: L-isoleucine biosynthesis I (from threonine)|g__Lautropia.s__Lautropia_mirabilis	0	0.87987	0	0	0	0	0	1.4771	0	0	0	5.88369	0	1.26128	0.5654	0.764592	0	4.81169	0	0	3.31198	0	4.40497	0.622513	0	0	0	7.85389	8.58176	4.18487	22.9507	5.77444	0	8.77419	0	0.864636	2.80186	10.6279	12.0236	9.57003	2.62738	0	0	0	0	0	0
ILEUSYN-PWY: L-isoleucine biosynthesis I (from threonine)|g__Leptotrichia.s__Leptotrichia_buccalis	0	0	0	0	0	0	0	0	0	0	0	0	0	0	0	0	0	1.50442	0	0	0	0	0	0.43686	0	0	0	0	0	0	2.75605	0	0	0	0	0	0	0	0	0	0	2.3656	0	0	0	0	0
ILEUSYN-PWY: L-isoleucine biosynthesis I (from threonine)|g__Leptotrichia.s__Leptotrichia_hofstadii	0	0	0	0	0	0	0	0	0	0	0	1.35968	0	0	1.68988	0	2.46441	0	2.23683	1.67306	0	0	1.11546	0.388101	0	0	3.46481	0	1.92515	0	0	0	0	0	0	0	0	0	0	2.41246	0	3.63766	0	0	0	0	0
ILEUSYN-PWY: L-isoleucine biosynthesis I (from threonine)|g__Megasphaera.s__Megasphaera_micronuciformis	0	0	0	0	0	0	0	0	0	0	0	0	0	0	0	0	0	0	0	0	0	0	0	0	0	0	0	0	0	0	0	0	0	0	0	0	0	0	0	0	0	0	0	1.21003	0	0	0
ILEUSYN-PWY: L-isoleucine biosynthesis I (from threonine)|g__Neisseria.s__Neisseria_elongata	0	0	0	0	0	0	0.784934	0	0	0	0	0	0	0	0	0	0	1.0773	0	1.58894	1.79716	0	0	1.04609	0	0	0	0	0	0	0	0	0	2.57816	0	0	0.566021	5.3779	1.94639	1.08062	0.522848	0	0	0	0	0	0
ILEUSYN-PWY: L-isoleucine biosynthesis I (from threonine)|g__Neisseria.s__Neisseria_flavescens	0	0	1.02207	3.02394	3.24201	0	0	3.11559	0	0	2.18957	0	0	15.2422	1.05656	0	2.25843	3.19785	0	10.9608	0	0	2.04118	0.744187	0	8.57391	7.46912	41.5501	2.26106	3.24755	7.08553	0	2.08158	15.5001	0	0	4.87111	16.64	1.95406	12.4784	5.45749	4.48622	0	3.55448	1.3889	0	1.80076
ILEUSYN-PWY: L-isoleucine biosynthesis I (from threonine)|g__Neisseria.s__Neisseria_macacae	0	0	0	0	0	8.13609	0	0	0	0	0	5.93804	0	0	0	0	1.17766	2.70048	2.81189	2.09972	1.79016	0	1.91953	1.01222	0	0	5.09581	20.4027	0	0	7.28227	0	0	0	0	4.87438	3.42614	1.97769	0	13.1085	0	2.03319	0	1.06288	0	0	0
ILEUSYN-PWY: L-isoleucine biosynthesis I (from threonine)|g__Neisseria.s__Neisseria_meningitidis	0	0	0	0	1.35321	0	0	0	0	0	0	0	0	0	0	0	0	0	0	0.897299	0	0	0	0	0	0	0	0	0	0	0	0	0	0	0	0	0	0	0	0	0	0	0	0	0	0	0
ILEUSYN-PWY: L-isoleucine biosynthesis I (from threonine)|g__Neisseria.s__Neisseria_sicca	0	0	0	1.71542	0	11.599	2.86202	0	0	1.97345	0	16.6483	2.82409	0	1.74988	0	0	7.58835	3.47242	6.32118	4.66493	4.88332	6.3731	3.16552	0	1.09297	20.8211	38.5699	0	0	11.8417	0	8.40389	26.4577	1.29356	2.74333	5.33999	10.8535	1.70685	15.6433	5.61189	4.31841	0	2.72087	5.22169	0	0
ILEUSYN-PWY: L-isoleucine biosynthesis I (from threonine)|g__Neisseria.s__Neisseria_sp_oral_taxon_014	0	0	0	0	0	0	0	0	0	0	0	0	0	0	0	0	0	0	0	0	0	0	0	0	0	0	0	0	0	0	0	0	0	0	0	0	0	0	0	0	3.67221	0	0	0	0	0	0
ILEUSYN-PWY: L-isoleucine biosynthesis I (from threonine)|g__Neisseria.s__Neisseria_subflava	0	0	0	0	0	0	0	0	0	0	0	0	0	0	0	0	0.581473	0	0	0	0	0	0	0	0	0	0	0	0	0	0	0	0	0	0	0	0	0	0	0	0	0	0	0	0	0	0
ILEUSYN-PWY: L-isoleucine biosynthesis I (from threonine)|g__Oribacterium.s__Oribacterium_sinus	0	3.81627	3.9962	0	2.85769	10.0893	0	0	2.68648	1.27266	0	15.8022	0	14.0387	3.5717	2.89158	0	9.54283	3.43508	2.46842	3.22949	3.29562	3.12033	0.751846	2.80911	2.47797	0	5.68093	4.48474	10.5985	6.11519	0	6.38894	5.74755	2.31747	2.24378	8.5616	2.33112	14.1383	12.1229	5.40555	3.28141	13.5357	0.954721	0	5.86285	4.93518
ILEUSYN-PWY: L-isoleucine biosynthesis I (from threonine)|g__Peptostreptococcaceae_noname.s__Eubacterium_yurii	0	0	0	0	0	0	0	0	0	0	0	0	0	0	0	0	0	0	0	0	0	0	0	0.0345615	0	0	0	0	0	0	0	0	0	0	0	0	0	0	0	0	0	0	0	0	0	0	0
ILEUSYN-PWY: L-isoleucine biosynthesis I (from threonine)|g__Prevotella.s__Prevotella_buccae	0	0	0	0	0	0	0	0	0	0	0	0	0	0	0	0	0	0	0	0	0	0	0	0	0	0	0	0	0	0	0	0	0	0	0	0	0	0	0	0	0	0	0	0	1.0481	0	0
ILEUSYN-PWY: L-isoleucine biosynthesis I (from threonine)|g__Propionibacterium.s__Propionibacterium_propionicum	0	0	0	0	0	0	0	0	0	0	0	1.23352	0	0	0	0	1.92767	0	0.702236	0	0	0	3.22324	1.37998	0	0	0	0	0	0	0	0	0	0	0	0	1.43083	0	0.67904	0	3.79337	0	0	0	0	0	0
ILEUSYN-PWY: L-isoleucine biosynthesis I (from threonine)|g__Rothia.s__Rothia_aeria	0	0	0	0	0	0	0	0	0	0	0	5.9689	0	0	0	0.546927	0	1.9038	3.59543	1.10243	3.79502	0	2.82342	0.678509	0	0	37.232	4.3899	2.50699	0.78393	2.65044	0	0	5.86787	0	0	3.53971	0	2.23154	2.77821	1.48064	0	0	0	0	0	0
ILEUSYN-PWY: L-isoleucine biosynthesis I (from threonine)|g__Rothia.s__Rothia_dentocariosa	0	0	0	0	0	8.56564	0	0	0	0	1.94108	4.00816	0	1.10209	0.748691	1.02948	1.56759	0	0	0	2.08598	0	7.04749	0.19208	1.79051	0	15.2816	0	0	1.51416	0	7.94047	4.5918	11.333	0	2.62608	4.99322	0	9.42545	2.08486	1.25287	0	0	0	0	0	0.982853
ILEUSYN-PWY: L-isoleucine biosynthesis I (from threonine)|g__Selenomonas.s__Selenomonas_artemidis	0	0	0	0	0	0	0	0	0	0	0	0	0	0	0	0	2.12212	0	0	0	0	0	0	0	0	0	0	0	0	0	0.836923	0	0	0	0	0	0	0	0	0	0	0	0	0	0	0	0
ILEUSYN-PWY: L-isoleucine biosynthesis I (from threonine)|g__Selenomonas.s__Selenomonas_flueggei	4.56866	0	12.6739	17.4833	7.25806	0	5.50112	0	4.60371	2.84941	8.9143	3.4186	13.628	2.43514	2.066	0	1.42088	1.07009	3.88062	20.9288	10.5256	14.6551	5.20557	2.80201	9.02325	0	0	0	0	1.15524	0	36.5901	75.9893	0	0	0	0	0	9.69638	8.23192	2.24111	4.62563	11.9169	0	2.77754	8.14312	0
ILEUSYN-PWY: L-isoleucine biosynthesis I (from threonine)|g__Selenomonas.s__Selenomonas_sputigena	0	0	0	0	0	0	0	0	0	0	0	0	0	0	0	0	0	0	0	4.14567	0	0	3.13032	0	0	0	0	0	0	0	0	0	1.31364	0	0	0	0	0	0	0	0	0	0	0	0	0	0
ILEUSYN-PWY: L-isoleucine biosynthesis I (from threonine)|g__Shuttleworthia.s__Shuttleworthia_satelles	0	1.24909	0	0	0	0	0	0	0	0	0	2.41972	0	0	0.649097	0	0	0	0	0	0	0	0	0	0	0	0	0	0	0.814724	0	0	0	0	0	0	0	0	0	0	0	0	0	0	0	1.6514	0
ILEUSYN-PWY: L-isoleucine biosynthesis I (from threonine)|g__Streptococcus.s__Streptococcus_australis	0	19.3073	7.75997	0.951284	0	0	2.7945	0	0	0	1.14391	3.38156	0	2.65645	0	0	3.12636	1.57916	3.59316	2.35811	0	1.58186	1.57072	1.01672	1.04805	0	9.57664	7.33636	17.4112	4.50538	17.0399	0	1.6317	35.4905	3.89679	0	12.7624	18.8432	1.3555	3.92314	18.3659	5.3309	0	0	0	1.31925	0
ILEUSYN-PWY: L-isoleucine biosynthesis I (from threonine)|g__Streptococcus.s__Streptococcus_cristatus	0	0	1.11876	0	0	0	1.91578	0	0	0	0	2.3853	0	0	0.606005	0	0	1.60652	2.98496	0	0	2.35349	3.22482	0	0	0	28.5245	1.43656	1.95733	0.785382	3.01201	0	0	0.852492	0.791618	0	0.964017	0.805534	0	3.12799	0.686102	6.8903	1.49322	0	0	4.51531	0
ILEUSYN-PWY: L-isoleucine biosynthesis I (from threonine)|g__Streptococcus.s__Streptococcus_infantis	3.51466	33.6501	8.11393	8.49723	3.0979	10.8724	15.5275	4.75621	6.61166	3.05712	5.11314	25.2407	0	34.2107	2.29316	7.84553	8.25579	4.86739	17.6018	5.48049	22.4456	5.59975	27.2275	3.46316	6.65634	1.53486	38.0068	16.4094	20.0197	10.894	36.3328	0	4.85847	34.8016	14.3369	0	16.5552	44.8304	4.43656	24.2029	28.7895	15.2497	10.0467	2.77308	5.39722	5.81387	4.21124
ILEUSYN-PWY: L-isoleucine biosynthesis I (from threonine)|g__Streptococcus.s__Streptococcus_mitis_oralis_pneumoniae	12.6224	36.9984	20.3951	6.72208	9.48192	53.085	39.3366	34.9724	17.3862	43.8083	17.7644	81.2856	16.3538	28.7147	54.1726	32.5725	30.6187	37.2595	51.3248	34.8383	71.5868	28.2791	34.1425	6.17594	14.4086	11.8334	96.3416	80.5059	23.4339	9.31133	91.0222	29.4923	41.478	108.649	19.9275	23.148	47.39	28.5736	40.5776	125.4	16.1345	56.8884	52.7803	10.8238	23.8939	13.3617	7.25283
ILEUSYN-PWY: L-isoleucine biosynthesis I (from threonine)|g__Streptococcus.s__Streptococcus_parasanguinis	33.4552	4.09526	0.845324	3.16695	5.86084	12.6729	9.04783	0	8.01652	9.48753	1.80373	20.3431	9.56638	24.2638	10.0593	12.9915	3.65551	1.67696	7.13677	3.31402	46.6783	3.88819	59.6807	5.80994	9.76576	4.29893	21.2037	8.39894	24.3554	47.115	5.64014	24.4136	11.4037	10.9676	0	24.6877	1.53702	19.1291	14.9293	15.2306	12.8952	22.3101	9.14899	3.27072	5.45216	13.4788	15.997
ILEUSYN-PWY: L-isoleucine biosynthesis I (from threonine)|g__Streptococcus.s__Streptococcus_peroris	0	0	0	0	0	0	0	0	0	0	0	0	0	0	0	0	0	0	0	0	0	0	0	0	0	0	0	0	0	0	0	0.834503	0	0	0	0	0	0	0	0	0	0	0	0	0	0	0
ILEUSYN-PWY: L-isoleucine biosynthesis I (from threonine)|g__Streptococcus.s__Streptococcus_pseudopneumoniae	0	0	0	0	0	0	0	0	0	0	0	0	0	0	0	0	0	0	0	1.48806	0	0	0	0	0	0	0	0	0	0	0	1.83296	0	0	0	0	4.45331	0	0	0	0	0	0	0	0	0	0
ILEUSYN-PWY: L-isoleucine biosynthesis I (from threonine)|g__Streptococcus.s__Streptococcus_sanguinis	3.14675	5.96453	30.5487	3.54433	0	45.3344	16.7312	8.44707	3.96367	10.3732	12.4871	31.31	7.04531	4.26044	8.91305	11.0595	2.0865	25.9074	13.9477	6.93989	11.3775	12.1973	20.8975	5.69542	1.79476	6.50318	28.7063	22.7694	9.65114	13.6005	28.7407	4.36517	17.3338	34.0651	2.81993	8.14739	26.0573	4.52556	8.66909	32.6017	12.3817	4.95891	18.9239	14.4788	25.8755	7.70182	4.61916
ILEUSYN-PWY: L-isoleucine biosynthesis I (from threonine)|g__Streptococcus.s__Streptococcus_sp_M334	0	0	0	0	0	0	0	0	0	0	0	0	0	0	0	0	0	0	0	0	11.4401	0	0	0	0	0	0	0	0	0	0	0	5.53459	0	0	0	0	0	0	0	0	0	0	0	0	0	0
ILEUSYN-PWY: L-isoleucine biosynthesis I (from threonine)|g__Streptococcus.s__Streptococcus_sp_SK140	0	0	0	0	0	0	0	0	0	0	0	0	0	11.628	0	0	0	0	0	0	0	0	0	1.21883	0	0	0	0	0	0	0	0	0	0	0	0	4.43338	0	0	0	0	0	0	0	0	0	0
ILEUSYN-PWY: L-isoleucine biosynthesis I (from threonine)|g__Streptococcus.s__Streptococcus_tigurinus	0	0	0	0	0	1.81449	1.19316	0	0	0	0	0	0	0	2.12538	0	0	0	0	0	0	0	0	0	0	0	0	0	0	0	0	0	0	0	0	0	0.526745	0	0	1.92817	0	0	0	0	0	0	0
ILEUSYN-PWY: L-isoleucine biosynthesis I (from threonine)|g__Veillonella.s__Veillonella_sp_oral_taxon_780	0	0	0	0	0	0	0	0	0	7.18463	0	0	0	0	3.65228	0	0	0	4.19406	0	8.69303	0	0	0	0	0	0	0	0	0	0	0	0	0	0	0	9.50882	0	4.27875	0	0	0	0	0	11.1507	0	0
ILEUSYN-PWY: L-isoleucine biosynthesis I (from threonine)|unclassified	8.7794	59.3599	32.026	12.8938	0	0	17.3834	11.5833	0	6.46025	10.3798	40.0587	0	26.7814	15.2847	20.3505	23.7806	18.563	20.6286	45.098	28.5366	0	26.9536	21.2716	13.2776	32.2069	0	22.285	16.3968	24.8241	17.6178	19.1913	44.211	30.8885	27.0839	10.6784	60.7755	33.4936	24.8559	18.7932	47.7303	41.0401	16.1608	17.596	16.4174	10.8043	13.5388
KDO-NAGLIPASYN-PWY: superpathway of (Kdo)2-lipid A biosynthesis	5.66699	0	0	0	0	0	0	0	0	0	0	0	0	0	0	4.68918	0	0	0	0	5.11445	0	0	2.31025	0	0	0	0	0	0	0	0	0	0	0	6.1333	0	0	0	0	0	0	0	0	2.84413	4.40154	31.9501
KDO-NAGLIPASYN-PWY: superpathway of (Kdo)2-lipid A biosynthesis|g__Escherichia.s__Escherichia_coli	0	0	0	0	0	0	0	0	0	0	0	0	0	0	0	0.355742	0	0	0	0	0	0	0	0.211316	0	0	0	0	0	0	0	0	0	0	0	0	0	0	0	0	0	0	0	0	0	0	24.6995
KETOGLUCONMET-PWY: ketogluconate metabolism	11.5368	0	2.17933	0	0	0	0	0	0	0	0	0	0	0	0	3.98512	0	0	0	0	0	0	0	1.68765	0	0	0	0	0	0	0	0	0	0	0	0	0	0	0	0	0	0	0	5.44867	2.57341	1.76886	39.9544
KETOGLUCONMET-PWY: ketogluconate metabolism|g__Escherichia.s__Escherichia_coli	0	0	0	0	0	0	0	0	0	0	0	0	0	0	0	0	0	0	0	0	0	0	0	0.269243	0	0	0	0	0	0	0	0	0	0	0	0	0	0	0	0	0	0	0	0	0	0	30.3016
LACTOSECAT-PWY: lactose and galactose degradation I	84.3542	175.222	157.172	58.2709	51.7	231.729	179.829	100.212	81.1841	130.144	104.971	285.764	68.2826	164.394	142.463	120.439	137.177	176.124	197.839	105.304	234.996	101.717	207.778	80.0516	74.4644	56.5035	446.664	198.063	180.185	156.01	295.704	115.855	133.915	339.494	102.32	152.01	207.382	282.459	116.157	314.741	173.06	216.338	132.54	97.5127	147.582	114.024	102.788
LACTOSECAT-PWY: lactose and galactose degradation I|g__Leptotrichia.s__Leptotrichia_buccalis	0	0	0	0	0	0	0	0	0	0	1.21324	0	0	0	0	0	0	0	0	0	0	0.934813	0	0.776695	0	0.673018	0	0	0	0	1.52425	0	1.44404	0	0	0	0	0	0	0.651329	0	0	0	0	0	0.970463	0
LACTOSECAT-PWY: lactose and galactose degradation I|g__Leptotrichia.s__Leptotrichia_hofstadii	0	0	0	0	0	0	0	0	0	0	0	0.613484	0	0	0.31165	0	3.48046	0	2.82457	0	0	0	1.3603	0.2428	0	0	1.22979	0	0	0	0	0	0	0	0	0	0	0	0	0.578327	0	4.52439	0	0	0	0	0
LACTOSECAT-PWY: lactose and galactose degradation I|g__Leptotrichia.s__Leptotrichia_shahii	0	0	0	0	0	0	0	0	0	0	0	0	0	0	0	0	0	0	0	0	0	0	0	0.610711	0	0	0	0	0	0	0	0	0	0	0	0	0	0	0	0.626922	0	0	0	0	1.08015	0	0
LACTOSECAT-PWY: lactose and galactose degradation I|g__Leptotrichia.s__Leptotrichia_wadei	0	0	0	0	0	0	0	0	0	0	0	0	0	0	0	0	0	0	0	0	0	0	1.25947	0.529461	0	0	0	0	0	0	0	0	0	0	0	0	0	0	0	1.15328	0	0	0	0	0	0	0
LACTOSECAT-PWY: lactose and galactose degradation I|g__Streptococcus.s__Streptococcus_anginosus	0	0	0	0	0	0	0	0	0	0	0	0	0	0	0.216397	0	0	0	0	0	0	0	0	0	0	0	0	0	0	0	0	0	0	0	0	0	0	0	0	0	0	0	0	0	0	0	0
LACTOSECAT-PWY: lactose and galactose degradation I|g__Streptococcus.s__Streptococcus_australis	0	27.2236	16.5573	1.24247	0	0	4.72242	0	0	0	3.35478	2.74793	0	5.87575	0	0	3.65079	2.88564	5.17967	2.56493	0.806461	2.0656	0.655225	0.879216	2.49925	0	19.9281	16.1172	30.3887	8.02251	31.1037	0	1.23294	62.7076	5.01182	0	25.0323	25.1648	1.23263	3.30612	36.2877	9.97633	0	0	2.1682	0	0
LACTOSECAT-PWY: lactose and galactose degradation I|g__Streptococcus.s__Streptococcus_cristatus	0	0	0	0	0	0	0	0	0	0	0	0	0	0	0.585423	0	0	1.57608	0	0	0	1.57488	0.724543	0	0	0	14.0207	0	0	0.384674	0.721491	0	0	2.81465	0	0	0.594225	0	0	0.669879	0.276152	1.26836	0	0	0	2.32652	0
LACTOSECAT-PWY: lactose and galactose degradation I|g__Streptococcus.s__Streptococcus_gordonii	0	2.3877	0	0	0	5.60825	0	0	0	2.71651	2.30518	4.15135	2.07469	0	3.5607	1.37235	5.00914	6.08859	0	0	2.01655	1.57825	3.45668	0.510346	0	0	6.71494	0	0	0.327564	0	0	0	1.94837	0	4.84655	0.433645	0	0	6.51981	0.207244	8.42383	0	5.62948	0	1.74663	0
LACTOSECAT-PWY: lactose and galactose degradation I|g__Streptococcus.s__Streptococcus_infantis	1.52604	43.8741	9.32097	12.4668	4.12115	6.65372	31.6372	4.7195	5.00643	7.18477	10.9444	38.7161	1.88373	40.7349	3.09758	9.61537	15.5078	11.2184	34.9955	14.2047	25.4241	8.04185	26.0793	7.81943	9.45917	7.24698	68.8781	16.6275	24.2747	12.7469	49.3392	0	7.17037	49.1557	29.8529	1.81815	26.5981	104.589	6.93032	40.011	45.1344	27.683	16.7851	8.49144	5.60744	11.5156	2.37508
LACTOSECAT-PWY: lactose and galactose degradation I|g__Streptococcus.s__Streptococcus_intermedius	0	0	0	0	0	0	0	0	0	0	0	0	0	0	0	0	0	0	0	0	0	0	0	0	0	0	0	0	0	0	0	0	0	0	0	0	0	0	0	0	0	0	0	3.40889	0	0	0
LACTOSECAT-PWY: lactose and galactose degradation I|g__Streptococcus.s__Streptococcus_mitis_oralis_pneumoniae	15.2707	39.7515	29.1341	8.31201	13.6796	71.8865	44.6933	29.3115	15.5536	49.0575	20.0254	81.8087	15.6062	32.4523	48.6174	44.3581	38.8362	40.5498	59.0089	34.9008	68.2887	25.5049	40.3563	8.58021	15.7696	11.8573	110.617	68.8205	24.9396	13.0882	100.937	35.9203	34.3992	97.0079	21.009	37.7769	32.2034	23.9682	43.7207	117.302	15.8083	61.3078	49.4031	18.1942	29.7288	22.8823	10.16
LACTOSECAT-PWY: lactose and galactose degradation I|g__Streptococcus.s__Streptococcus_mutans	0	0	0	0	0	0	0	0	0	0	0	0	0	0	1.16372	0	0	0	0	0	0	0	0	0.0449759	0	0	0	0	0	0	0	6.20387	0	0	0	1.71203	0	0	0.172115	0	0	0	0	0	0	0	0
LACTOSECAT-PWY: lactose and galactose degradation I|g__Streptococcus.s__Streptococcus_oligofermentans	0	0	0	0	0	0	0	0	0	0	0	0	0	0	0	0	0	1.05922	0	0	0	0	0	0	0	0	0	0	0	0	0	0	0	0	0	0	0	0	0	0	0	0	0	0	0	0	0
LACTOSECAT-PWY: lactose and galactose degradation I|g__Streptococcus.s__Streptococcus_parasanguinis	39.5538	8.74743	1.26356	3.48548	9.73148	22.7439	11.5769	1.04376	11.8098	12.0729	3.25966	19.9683	16.0659	36.7941	10.139	12.7903	4.67446	4.96753	9.27403	5.23339	40.067	6.03791	53.8003	7.472	11.6336	2.95601	23.5131	7.30157	25.9429	45.7945	14.2516	27.5316	9.37518	16.2474	3.42827	35.2821	5.48903	28.1761	11.9457	20.0847	16.6207	24.6621	7.91133	6.27545	7.03245	19.0156	14.9777
LACTOSECAT-PWY: lactose and galactose degradation I|g__Streptococcus.s__Streptococcus_peroris	0	0	0	0	0	0	0	0	0	0	0.695784	2.52413	0	2.74325	0	0	0	0	0	0	0	0	0	0	0	0	0	0	2.26545	0	0	2.80772	0	1.26743	2.04062	0	0	1.7802	0.572125	0.630337	0	0	0	0	0	0	0
LACTOSECAT-PWY: lactose and galactose degradation I|g__Streptococcus.s__Streptococcus_pseudopneumoniae	0	0	0	0	0	0	0	0	0	0	0	0	0	0	0	0	0	5.58359	4.16642	6.30806	0	0	0	0	0	0	0	0	0	0	0	5.48664	0	0	0	0	7.68406	0	0	0	0	0	4.36885	0	0	0	0
LACTOSECAT-PWY: lactose and galactose degradation I|g__Streptococcus.s__Streptococcus_pyogenes	0	0	0	0	0	0	0	0	0	0	0	0	0	0	0	0	0	0	0	0	0	0	0	0.255155	0	0	0	0	0	0	0	1.71998	0	0	0	0	0	0	0	0	0	0	0	0	0	0	0
LACTOSECAT-PWY: lactose and galactose degradation I|g__Streptococcus.s__Streptococcus_salivarius	0	0	0	0	0	0	0	0	0	0	0	0	0	0	0	0	0	0	0	0	0	0	0	0.288772	0	0	29.2457	0	1.38991	0	0	0	0	0	0	0	1.9275	0	0	0	0.32591	0	0	1.56459	0	1.26913	0
LACTOSECAT-PWY: lactose and galactose degradation I|g__Streptococcus.s__Streptococcus_sanguinis	8.13712	8.06597	49.7855	1.97623	2.80029	45.1726	27.6878	12.0789	7.70434	21.9021	22.4358	50.4474	7.82102	4.95176	15.545	11.4175	8.82059	36.7253	30.3507	12.151	18.6433	12.0939	25.4509	7.67844	6.84878	8.81274	63.9902	38.6916	11.538	19.1355	38.1857	4.03677	19.4218	46.143	2.62029	16.6627	40.333	8.2693	11.2402	44.1128	19.5407	6.75296	18.5616	18.5586	42.9588	11.684	4.60848
LACTOSECAT-PWY: lactose and galactose degradation I|g__Streptococcus.s__Streptococcus_sobrinus	0	0	0	0	0	0	0	0	0	0	0	0	0	0	0.324914	0	0	0	0	0	0	0	0	0	0	0	0	0	0	0	0	0	0	0	0	0	0	0	0	0	0	0	0	0	0	0	0
LACTOSECAT-PWY: lactose and galactose degradation I|g__Streptococcus.s__Streptococcus_sp_M334	0	0	0	0	0	0	0	0	0	0	0	0	0	0	0	0	0	0	0	0	14.3047	0	0	0	0	0	0	0	0	0	0	0	8.77018	0	0	0	0	0	0	0	0	0	0	0	0	0	0
LACTOSECAT-PWY: lactose and galactose degradation I|g__Streptococcus.s__Streptococcus_sp_SK140	0	0	0	0	0	0	0	0	0	0	0	0	0	9.12637	0	0	0	0	0	0	0	0	0	1.40987	0	0	0	0	0	0	0	0	0	0	0	0	3.96346	0	0	0	0	0	0	0	0	0	0
LACTOSECAT-PWY: lactose and galactose degradation I|g__Streptococcus.s__Streptococcus_tigurinus	0	0	0	0	0	1.67906	1.04494	2.23402	1.21736	0	0	0	0	0	7.78083	0	2.41015	2.32871	0	0	2.39711	3.74293	0	0	0	0	10.1219	0	0	0	7.6928	1.23463	2.10083	0	1.05347	0	1.1834	0	4.38019	7.56985	0.205026	3.14055	0	0	2.60622	0	0
LACTOSECAT-PWY: lactose and galactose degradation I|unclassified	0	0	0	4.49911	0	0	0	0	6.21885	5.11893	0	0	0	4.76274	0	0.954453	0	0	6.11688	5.69713	4.23422	0	10.7724	7.38324	4.95656	0	34.6419	12.4459	7.61959	0	2.63157	0	0	7.79964	0	5.58593	12.416	13.5496	1.6051	3.19616	2.74412	3.48932	0	0	0	0	0
LEU-DEG2-PWY: L-leucine degradation I	0	0	0	0	0	0	0	0	0	0	0	0	0	0	0	0	0	0	0	0	0	0	0	2.89321	0	0	0	0	0	0	0	0	0	0	0	0	0	0	0	0	0	0	0	0	0	0	0
LEU-DEG2-PWY: L-leucine degradation I|g__Acidovorax.s__Acidovorax_ebreus	0	0	0	0	0	0	0	0	0	0	0	0	0	0	0	0	0	0	0	0	0	0	0	1.17604	0	0	0	0	0	0	0	0	0	0	0	0	0	0	0	0	0	0	0	0	0	0	0
LEU-DEG2-PWY: L-leucine degradation I|g__Enhydrobacter.s__Enhydrobacter_aerosaccus	0	0	0	0	0	0	0	0	0	0	0	0	0	0	0	0	0	0	0	0	0	0	0	0.200304	0	0	0	0	0	0	0	0	0	0	0	0	0	0	0	0	0	0	0	0	0	0	0
LEU-DEG2-PWY: L-leucine degradation I|unclassified	0	0	0	0	0	0	0	0	0	0	0	0	0	0	0	0	0	0	0	0	0	0	0	0.277538	0	0	0	0	0	0	0	0	0	0	0	0	0	0	0	0	0	0	0	0	0	0	0
LPSSYN-PWY: superpathway of lipopolysaccharide biosynthesis	3.46587	0	0	0	0	0	0	0	0	0	0	0	0	0	0	2.56541	0	0	0	0	0	0	0	0.470165	0	0	0	0	0	0	0	0	0	0	0	2.90339	0	0	0	0	0	0	0	0	0	0	54.4532
LPSSYN-PWY: superpathway of lipopolysaccharide biosynthesis|g__Escherichia.s__Escherichia_coli	0	0	0	0	0	0	0	0	0	0	0	0	0	0	0	0.45622	0	0	0	0	0	0	0	0.059644	0	0	0	0	0	0	0	0	0	0	0	0	0	0	0	0	0	0	0	0	0	0	26.3939
MET-SAM-PWY: superpathway of S-adenosyl-L-methionine biosynthesis	231.486	257.132	320.844	224.303	152.493	319.793	229.336	225.75	184.847	234.242	158.681	366.711	239.314	307.931	256.058	211.313	209.125	198.201	247.185	242.418	372.618	234.128	337.162	230.261	242.422	164.961	384.391	284.83	300.664	387.524	340.443	278.878	317.681	417.595	204.273	310.498	265.935	294.302	319.86	394.584	256.419	277.301	197.569	245.135	257.659	252.262	227.517
MET-SAM-PWY: superpathway of S-adenosyl-L-methionine biosynthesis|g__Escherichia.s__Escherichia_coli	0	0	0	0	0	0	0	0	0	0	0	0	0	0	0	0	0	0	0	0	0	0	0	0.0202904	0	0	0	0	0	0	0	0	0	0	0	0	0	0	0	0	0	0	0	0	0	0	2.11436
MET-SAM-PWY: superpathway of S-adenosyl-L-methionine biosynthesis|g__Leptotrichia.s__Leptotrichia_buccalis	0	0	0	0	0	0	0	0	0	0	0	0	0	0	0	0	0	0	0	0	0	0	0	0.301793	0	0	0	0	0	0	0.604956	0	0	0	0	0	0	0	0	0	0	1.57226	0	0	0	0	0
MET-SAM-PWY: superpathway of S-adenosyl-L-methionine biosynthesis|g__Leptotrichia.s__Leptotrichia_shahii	0	0	0	0	0	0	0	0	0	0	0	0	0	0	0	0	0	0	0	0.581407	0	0	0	0	0	0	0	0	0	0	0	0	0	0	0	0	0	0	0	0	0	0	0	0	0	0	0
MET-SAM-PWY: superpathway of S-adenosyl-L-methionine biosynthesis|g__Oribacterium.s__Oribacterium_sinus	0	1.95175	2.85816	0	0	6.45977	0	0	2.82481	1.62902	0	9.86198	0	10.5095	3.01203	3.73527	0	8.81328	1.7953	1.41368	2.13266	2.83466	2.38869	0.491964	1.09394	0	1.42101	2.63622	4.27195	8.12101	4.48631	0	5.48336	1.93777	1.85892	1.31728	5.88804	1.33949	10.6974	7.47215	4.96509	1.78108	10.9038	0	0	4.8883	0
MET-SAM-PWY: superpathway of S-adenosyl-L-methionine biosynthesis|g__Selenomonas.s__Selenomonas_flueggei	0	0	0	4.64086	0	0	0	0	0	0	0	0	0	0	0.454927	0	0	0	0	1.97174	0	0	0	0.676012	0	0	0	0	0	0	0	0	11.6403	0	0	0	0	0	0	1.01043	0.402905	1.15158	0	0	0	0	0
MET-SAM-PWY: superpathway of S-adenosyl-L-methionine biosynthesis|g__Streptococcus.s__Streptococcus_infantis	0	13.4948	4.80443	4.05226	0	6.91978	9.51179	2.51048	3.95376	0	3.55092	15.023	0	16.8959	1.80301	3.7546	2.68918	1.4806	11.0928	3.5853	13.6719	3.67773	11.5913	2.06611	1.44859	2.25483	9.22202	7.47464	13.3979	5.27965	21.4126	0	4.21404	14.6475	9.13056	0	7.35622	13.1689	3.71019	20.1814	12.0057	8.73896	4.80905	1.48048	1.48543	4.89293	2.64378
MET-SAM-PWY: superpathway of S-adenosyl-L-methionine biosynthesis|g__Streptococcus.s__Streptococcus_mitis_oralis_pneumoniae	7.86483	28.6191	15.6603	6.83546	6.55572	39.2196	34.5765	23.9284	17.8278	36.8114	14.1984	62.6054	13.7052	19.945	42.7898	26.2589	27.7288	27.301	43.346	20.7358	56.4444	16.4143	27.7835	4.79093	9.69216	8.0368	82.4359	61.1641	15.6721	8.4468	67.5007	24.1871	31.6929	84.8781	16.4976	20.1395	35.267	36.2414	31.2197	99.2465	14.3703	46.5728	31.3587	4.10019	19.8634	12.1982	4.75691
MET-SAM-PWY: superpathway of S-adenosyl-L-methionine biosynthesis|g__Streptococcus.s__Streptococcus_sanguinis	1.8916	2.62863	19.1119	0	0	14.0418	9.96274	5.36843	2.8412	7.38263	6.81222	16.1572	0	1.72988	5.8849	5.6342	2.35993	15.0085	13.0392	6.16787	7.46412	5.95472	12.8865	2.43424	1.47682	3.21595	18.1804	13.4368	0	6.3915	14.1074	0	12.3676	23.6673	1.47217	3.46641	16.3398	0	2.24608	20.0062	9.37241	3.71594	9.73036	3.95223	16.6141	3.46322	1.09569
MET-SAM-PWY: superpathway of S-adenosyl-L-methionine biosynthesis|g__Streptococcus.s__Streptococcus_tigurinus	0	0	0	0	0	0	0	0	0	0	0	0	0	0	0.82611	0	0	0	0	0	0	0	0	0	0	0	2.95737	0	0	0	0	0	0	0	0	0	0	0	0	0	0	0	0	0	0.844157	0	0
MET-SAM-PWY: superpathway of S-adenosyl-L-methionine biosynthesis|unclassified	35.1337	81.5512	30.717	36.9598	14.6363	0	29.7824	21.3875	35.5801	0	23.8743	36.6211	26.1003	43.2368	24.7651	28.1838	4.60759	24.5702	9.88267	46.1946	49.0861	39.3664	40.0067	29.9087	37.173	33.5811	23.2386	26.4527	51.4277	50.3052	31.3417	31.3157	71.3755	27.2628	52.7077	52.0646	50.6122	15.3452	31.7257	37.2283	48.0101	18.8378	20.9962	35.4954	15.9596	12.7035	17.1048
METHGLYUT-PWY: superpathway of methylglyoxal degradation	7.39043	34.8853	16.4597	12.2308	5.13952	24.3912	29.8731	14.4383	22.2481	16.3185	6.49291	68.1138	3.98383	37.1034	15.7706	14.1238	15.7546	18.7802	37.0698	34.7345	36.2566	12.2437	42.2597	8.71869	7.65231	0	19.1179	61.31	10.9039	0	41.9381	17.7354	15.3745	56.2672	17.5746	11.6627	22.1028	111.374	16.1601	62.055	20.8642	26.8096	18.4054	16.0638	14.9994	4.16814	43.4936
METHGLYUT-PWY: superpathway of methylglyoxal degradation|g__Escherichia.s__Escherichia_coli	0	0	0	0	0	0	0	0	0	0	0	0	0	0	0	0.11643	0	0	0	0	0	0	0	0.0570017	0	0	0	0	0	0	0	0	0	0	0	0	0	0	0	0	0	0	0	0	0	0	8.08478
METHGLYUT-PWY: superpathway of methylglyoxal degradation|unclassified	0	0	8.40798	0	0	0	0	0	0	0	0	0	0	0	0	0	0	0	0	0	0	0	0	0.418802	0	0	0	0	0	0	0	0	0	0	0	0	0	0	0	0	2.95752	0	0	0	0	0	0
METHYLGALLATE-DEGRADATION-PWY: methylgallate degradation	0	0	0	0	0	0	0	0	0	0	0	0	0	0	0	0	0	0	0	0	0	0	0	0.199483	0	0	0	0	0	0	0	0	0	0	0	0	0	0	0	0	0	0	0	0	0	0	0
METHYLGALLATE-DEGRADATION-PWY: methylgallate degradation|unclassified	0	0	0	0	0	0	0	0	0	0	0	0	0	0	0	0	0	0	0	0	0	0	0	0.193424	0	0	0	0	0	0	0	0	0	0	0	0	0	0	0	0	0	0	0	0	0	0	0
METSYN-PWY: L-homoserine and L-methionine biosynthesis	235.939	266.582	315.5	221.506	160.829	298.897	223.847	226.39	174.824	211.841	160.625	367.404	242.429	315.471	251.682	205.689	189.79	195.49	243.225	222.875	365.159	212.859	347.646	207.529	250.003	154.917	387.741	284.965	320.112	382.607	337.69	293.432	308.128	415.403	190.755	302.861	264.225	288.074	324.301	384.211	260.355	260.612	195.755	225.314	240.55	258.723	226.636
METSYN-PWY: L-homoserine and L-methionine biosynthesis|g__Escherichia.s__Escherichia_coli	0	0	0	0	0	0	0	0	0	0	0	0	0	0	0	0	0	0	0	0	0	0	0	0.017761	0	0	0	0	0	0	0	0	0	0	0	0	0	0	0	0	0	0	0	0	0	0	2.49961
METSYN-PWY: L-homoserine and L-methionine biosynthesis|g__Leptotrichia.s__Leptotrichia_buccalis	0	0	0	0	0	0	0	0	0	0	0	0	0	0	0	0	0	0	0	0	0	0	0	0.309865	0	0	0	0	0	0	0.627293	0	0	0	0	0	0	0	0	0	0	1.7685	0	0	0	0	0
METSYN-PWY: L-homoserine and L-methionine biosynthesis|g__Leptotrichia.s__Leptotrichia_shahii	0	0	0	0	0	0	0	0	0	0	0	0	0	0	0	0	0	0	0	0.599556	0	0	0	0.0427639	0	0	0	0	0	0	0	0	0	0	0	0	0	0	0	0	0	0	0	0	0	0	0
METSYN-PWY: L-homoserine and L-methionine biosynthesis|g__Oribacterium.s__Oribacterium_sinus	0	2.31743	2.99371	0	0	6.93619	0	0	3.46739	1.70954	0	11.6641	0	11.4122	3.19987	4.22015	0	9.22739	2.07113	1.48537	2.35121	3.67028	2.60277	0.529026	1.11384	0	2.06749	2.79278	4.52273	8.88909	4.89843	0	6.31411	2.14124	2.06636	2.05139	6.34513	1.42452	11.3426	7.95854	5.42141	2.09144	12.3049	0.998048	0	5.56886	3.00944
METSYN-PWY: L-homoserine and L-methionine biosynthesis|g__Selenomonas.s__Selenomonas_flueggei	0	0	0	4.37264	0	0	0	0	0	0	0	0	0	0	0.421045	0	0	0	0	1.84043	0	0	0	0.693612	0	0	0	0	0	0	0	0	10.5817	0	0	0	0	0	0	0.96366	0.385895	1.02738	0	0	0	0	0
METSYN-PWY: L-homoserine and L-methionine biosynthesis|g__Streptococcus.s__Streptococcus_infantis	0	12.0549	4.28549	3.65503	0	6.71318	8.65219	2.34638	3.66676	0	3.26503	13.9962	0	16.2099	1.72413	3.55697	2.4029	1.29346	10.0572	3.31104	12.5589	3.37974	10.4573	1.86396	1.25896	2.10143	8.21606	6.8313	12.432	4.74908	19.8506	0	3.81414	13.0126	8.22278	0	6.62461	11.5601	3.40807	19.1103	10.7871	8.06738	4.58006	1.315	1.32322	4.50698	2.47752
METSYN-PWY: L-homoserine and L-methionine biosynthesis|g__Streptococcus.s__Streptococcus_mitis_oralis_pneumoniae	7.61971	29.1237	15.4964	6.64048	6.69431	39.8352	35.5689	24.233	18.4129	36.5565	15.887	61.9414	14.5046	20.6199	42.4328	25.3621	26.9646	27.0693	43.4215	21.0593	56.6406	16.1511	28.0999	4.6779	9.75494	8.68626	82.7023	61.0698	15.6527	8.57878	68.0723	25.5706	34.1077	83.0701	16.5482	20.4123	35.8943	36.2455	31.103	96.7878	14.2437	45.5766	30.1297	5.21465	19.8635	12.1768	5.19501
METSYN-PWY: L-homoserine and L-methionine biosynthesis|g__Streptococcus.s__Streptococcus_sanguinis	1.7544	2.47588	19.5462	0	0	12.6051	10.2808	5.13307	3.59364	7.1739	6.66582	15.1307	0	1.66057	5.5388	5.26636	2.09146	13.8436	13.0624	6.75398	6.8617	6.63356	12.3602	2.31514	1.51839	3.02629	17.5094	14.1859	0	6.02905	13.0012	2.61486	11.7382	22.799	1.56785	3.1278	15.6081	0	2.49123	18.9862	9.64643	3.36568	10.165	4.30196	17.17	3.15566	1.01192
METSYN-PWY: L-homoserine and L-methionine biosynthesis|g__Streptococcus.s__Streptococcus_tigurinus	0	0	0	0	0	0	0	0	0	0	0	0	0	0	1.06138	0	0.748154	0	0	0	0	0	0	0	0	0	3.31153	0	0	0	0	0	0	0	0	0	0	0	0	0	0	0	0	0	0.881189	0	0
METSYN-PWY: L-homoserine and L-methionine biosynthesis|unclassified	34.51	80.4554	36.7509	36.1684	16.6267	0	30.4993	25.7779	34.9018	0	26.3031	37.4613	25.3601	43.494	24.1184	25.2815	5.66939	23.5188	11.5478	46.7199	52.1516	37.9265	40.0147	28.7965	39.9491	32.5593	26.9158	28.1347	51.3284	51.3257	30.1498	31.1216	73.3563	26.4824	50.997	57.5497	47.0547	13.5238	32.8076	38.0301	47.6278	20.9999	24.1531	36.4677	17.7603	15.3626	18.8535
NAD-BIOSYNTHESIS-II: NAD salvage pathway II	46.8097	73.5766	70.661	40.5721	39.481	94.3724	111.689	70.0835	55.2409	107.584	60.5459	117.368	53.166	110.337	75.395	51.1736	92.7084	79.2787	110.835	46.212	128.268	67.4409	90.2422	36.737	40.9531	33.1954	186.173	131.316	96.9177	69.7684	153.337	83.0468	92.2367	204.867	72.9758	53.787	90.6658	139.289	74.7032	156.46	67.8398	98.7499	87.3901	61.4906	67.9344	52.082	63.6209
NAD-BIOSYNTHESIS-II: NAD salvage pathway II|g__Escherichia.s__Escherichia_coli	0.869441	0	0	0	0	0	0	0	0	0	0	0	0	0	0	0.384428	0	0	0	0	0.726251	0	0	0.198757	0	0	0	0	0	0	0	0	0	0	0	0.748723	0	0	0	0	0	0	1.06694	0	0	0	40.1519
NAD-BIOSYNTHESIS-II: NAD salvage pathway II|g__Haemophilus.s__Haemophilus_haemolyticus	0	0	0	0	0	0	2.31238	1.17207	0	0	1.14518	0	0	0.940783	0.575014	0.0600291	0.703767	2.09743	0	0.94622	0.729044	0.612747	0.673813	0	1.48258	0	0.955907	6.21481	0	0.658285	2.71793	1.0784	1.08097	0.432007	0	0	1.306	0	0	2.06909	0.610018	0	0	0	0	0	0
NAD-BIOSYNTHESIS-II: NAD salvage pathway II|g__Haemophilus.s__Haemophilus_influenzae	0	0	0	0	0	10.728	1.05523	0.585095	0	0	0	0.637609	0	4.13742	0.409493	6.3792	0	0	0	0	0.853695	0	0.772154	0	1.71484	0	0	1.66547	0	0	1.70605	0.748196	8.13714	0.951835	0	0	1.13462	2.53551	0	0.677121	0.108982	0	0	0	0	0	0
NAD-BIOSYNTHESIS-II: NAD salvage pathway II|g__Haemophilus.s__Haemophilus_parahaemolyticus	0	0	0	0	0	0	0	0	0	0	0	0	0	0	0	0	0	0	0	1.09277	0	0	0	0	0	0	0	0	0	0	1.65221	2.43406	0	2.824	0	0	0	0	0	0	0	0	0	0	0	0	0
NAD-BIOSYNTHESIS-II: NAD salvage pathway II|g__Haemophilus.s__Haemophilus_sputorum	0	0	0	0	0	0	1.62382	2.63126	0	0	0	0	0	2.14336	0	0	0	0	1.87154	2.15603	0	0.821994	0	0.0302939	0	0.538424	0	1.93785	0	1.90754	4.537	0	0	0	0	0	1.34755	2.27271	3.09175	0.691048	0	0	0	0	0	0	0
NAD-BIOSYNTHESIS-II: NAD salvage pathway II|g__Streptococcus.s__Streptococcus_infantis	0	15.6601	2.44115	3.98068	1.76912	2.51637	14.2426	2.03341	1.22037	4.52639	3.48075	2.88346	0	16.1276	0.314882	0.0230717	4.34439	4.55577	14.558	3.04967	5.43125	3.09101	8.21977	2.82004	3.84413	1.37351	21.8349	2.77278	6.80722	5.78998	23.576	0	3.10966	15.7993	11.1219	0	7.24175	28.6811	1.59488	2.27421	10.0436	10.4274	4.63791	0.612622	2.10311	2.08003	1.87501
NAD-BIOSYNTHESIS-II: NAD salvage pathway II|g__Streptococcus.s__Streptococcus_mitis_oralis_pneumoniae	0	10.068	3.8369	6.16408	2.29393	9.32737	8.51864	2.26189	2.95492	0	0	12.5897	0	8.26977	1.85519	1.42541	1.78807	0	3.69103	3.05765	6.34395	0	0	2.8203	3.44816	0	22.6289	0	1.78827	3.11064	6.28041	2.43564	0	11.5036	7.58356	2.0219	3.08549	8.46276	1.15782	21.5692	5.89663	9.18155	3.66574	0	2.23523	2.07541	4.15963
NAD-BIOSYNTHESIS-II: NAD salvage pathway II|unclassified	0	0	0	0	0	0	0	0	0	0	0	0	0	0	0	0	0	0	2.18396	0	2.32933	0	0	0.511698	0	0	0	0	0	0	0	5.80603	0	1.42239	0	0	0.646512	0	0	0	0.758256	0	0	0	0	0	0
NAGLIPASYN-PWY: lipid IVA biosynthesis	27.8638	99.647	108.846	66.685	22.1891	120.837	64.2852	73.5306	71.1146	32.7513	56.6592	123.727	76.5219	181.361	60.4476	36.5217	36.6408	82.9736	95.2792	135.411	99.5613	42.2422	71.1166	79.7397	49.5363	66.0929	100.185	259.144	203.965	211.67	214.937	34.7727	158.019	232.066	38.9219	78.1555	109.295	262.246	169.088	170.121	204.845	88.7587	51.6755	73.8131	40.8227	25.8362	90.1642
NAGLIPASYN-PWY: lipid IVA biosynthesis|g__Acidovorax.s__Acidovorax_ebreus	0	0	0	0	0	0	0	0	0	0	0	0	0	0	0	0	0	0	0	0	0	0	0	0.395782	0	0	0	0	0	0	0	0	0	0	0	0	0	0	0	0	0	0	0	0	0	0	0
NAGLIPASYN-PWY: lipid IVA biosynthesis|g__Aggregatibacter.s__Aggregatibacter_aphrophilus	0	0	0	0	0	0	0	0	0	0	0	0	0	0	0	0	0	0	0	0	0	0	0	0.0256956	0	0	0	1.73937	0	0	0	0	0	0	0	0	0	0	0	1.23788	0	0	0	0	0	0	0
NAGLIPASYN-PWY: lipid IVA biosynthesis|g__Aggregatibacter.s__Aggregatibacter_segnis	0	0	0	0	0	0	0	0	0	0	3.29337	1.19424	0	0	0	0	0	0.830526	3.8727	1.92654	0	0	0	0	0	0	0	0	0.919679	0	3.4439	0	0	2.54088	0	0	0	0	0	0	0	2.57658	0	0	0	0	0
NAGLIPASYN-PWY: lipid IVA biosynthesis|g__Cardiobacterium.s__Cardiobacterium_hominis	0	0	0	0	0	0	0	0	0	0	0	0	0	0	0	0	0	0	0	0	0	0	0	0.312209	0	0	0	0	0	0.623896	0	0	0	0	0	0	0	0	0	0	0	0	0	0	0	0	0
NAGLIPASYN-PWY: lipid IVA biosynthesis|g__Eikenella.s__Eikenella_corrodens	0	0	0	0	0	0	0	0	0	0	0	0	0	0	0	0	0	0	0	0	0	0	0	0	0	0	0	0	0	0	0	0	0	0	0	0	0.22084	0	0	0	0	0	0	0	0	0	0
NAGLIPASYN-PWY: lipid IVA biosynthesis|g__Enhydrobacter.s__Enhydrobacter_aerosaccus	0	0	0	0	0	0	0	0	0	0	0	0	0	0	0	0	0	0	0	0	0	0	0	0.0681706	0	0	0	0	0	0	0	0	0	0	0	0	0	0	0	0	0	0	0	0	0	0	0
NAGLIPASYN-PWY: lipid IVA biosynthesis|g__Escherichia.s__Escherichia_coli	0	0	0	0	0	0	0	0	0	0	0	0	0	0	0	0.602382	0	0	0	0	0.616166	0	0	0.152815	0	0	0	0	0	0	0	0	0	0	0	0	0	0	0	0	0	0	0	0	0	0	23.1076
NAGLIPASYN-PWY: lipid IVA biosynthesis|g__Haemophilus.s__Haemophilus_haemolyticus	0	0	0	0	0	0	0.973277	0	0	0	0	0	0	0	0	0	0	0	0	0	0	0	0	0	0	0	0	0	0	0	0	0	0	0	0	0	0	0	0	0	0	0	0	0	0	0	0
NAGLIPASYN-PWY: lipid IVA biosynthesis|g__Haemophilus.s__Haemophilus_influenzae	0	0	0	0	0	6.18692	0	0	0	0	0	0	0	2.24892	0	4.40308	0	0	0	0	0.857911	0	0	0	0	0	0	0	0	0	0	0	5.6148	0.543942	0	0	0.739041	1.43909	0	0	0	0	0	0	0	0	0
NAGLIPASYN-PWY: lipid IVA biosynthesis|g__Haemophilus.s__Haemophilus_parahaemolyticus	0	0.604911	0	0	0	0	0	0	0	0	0	0	0	0	0	0	0	0	0	0	0	0	0	0	0	0	0	0	0	0	0	0	0	0.776912	0	0	0	0	0	0	0	0	0	0	0	0	0
NAGLIPASYN-PWY: lipid IVA biosynthesis|g__Haemophilus.s__Haemophilus_parainfluenzae	0	17.902	40.9414	17.3012	4.96185	24.45	17.9914	7.28766	13.0634	6.30615	7.11205	12.6412	6.20496	55.8342	13.4636	3.5515	5.50984	15.8162	19.9327	20.6462	15.3791	5.11767	14.2687	14.5675	12.1581	7.70037	12.0433	44.118	77.1453	82.7287	66.1579	0	18.7074	85.4475	7.2929	9.91362	32.4105	67.5771	43.9498	16.9212	59.2839	5.91002	0	20.1086	11.3553	2.42591	15.6869
NAGLIPASYN-PWY: lipid IVA biosynthesis|g__Haemophilus.s__Haemophilus_paraphrohaemolyticus	0	0	0	0	0	0	0	0	0	0	0	0	0	0	0	0	1.32427	0	0	0	1.63941	0	0	0	0	0	0	0	0	0	0	0	0.945822	0.540616	0	0	1.2351	0	0	0	0	0	0	0	0	0	0
NAGLIPASYN-PWY: lipid IVA biosynthesis|g__Haemophilus.s__Haemophilus_sputorum	0	0	0	0	0	0	0	0.882571	0	0	0	1.34867	0	1.36674	0	0	0	0	1.1295	0.880592	0	0	0	0.22173	0	0	0	0	0	1.47554	3.27304	0	0	0	0	0	1.04655	2.31936	2.32316	0.518084	0	0	0	0	0	0	0
NAGLIPASYN-PWY: lipid IVA biosynthesis|g__Kingella.s__Kingella_denitrificans	0	0	0	0	0	0	0	0	0	0	0	0	0	0	0	0	0	0	0	0.764025	1.34642	0	0	0	0	0	0	0	0	0	0	0	0	0.317644	0	1.25589	0	0	0	0.437419	0	0	0	0	0	0	0
NAGLIPASYN-PWY: lipid IVA biosynthesis|g__Kingella.s__Kingella_oralis	0	0	0	0	0	0	0	0	0	0	0	0	0	0	0	0	0	0	0	0	0	0	0	0	0	0	0	0	0	0	0	0	0	0	0	0	0	0	0.379682	0	0	0	0	0	0	0	0
NAGLIPASYN-PWY: lipid IVA biosynthesis|g__Lautropia.s__Lautropia_mirabilis	0	0	0	0	0	0	0.997339	1.04523	0	0	0	5.64626	0	0	0.538819	0.175788	0	3.73885	0	0	1.78461	0	2.55114	0.132732	0	0.71396	0	6.4559	5.72308	2.0517	12.4581	2.76756	1.03106	7.49676	0	0	2.16883	5.09292	10.9631	8.35825	1.31825	0	0	0	0	1.16103	0
NAGLIPASYN-PWY: lipid IVA biosynthesis|g__Neisseria.s__Neisseria_elongata	0	0	0	0	0	0	0	0	0	0	0	0	0	0	0	0	0	0	0	0.820562	2.23109	0	0	0.824929	0	0	0	0	0	0	0	0	0	1.13952	0	0.813777	0.512424	2.13352	0.74123	0	0	0	0	0	0	0	0
NAGLIPASYN-PWY: lipid IVA biosynthesis|g__Neisseria.s__Neisseria_flavescens	0	3.28084	0	2.35	0	0	1.66785	2.2957	1.39049	0	4.95952	1.99752	0	6.62736	0	0	0	1.91007	2.88281	6.97952	0	0	2.0984	2.97095	0	4.19903	5.83367	20.5253	5.55317	4.27489	26.1952	0	3.41882	18.9067	1.08636	0	4.88096	45.4149	4.47555	10.5594	26.379	2.44209	0	3.18115	0	0	0
NAGLIPASYN-PWY: lipid IVA biosynthesis|g__Neisseria.s__Neisseria_macacae	0	0	0	0	0	0	0	0	0	0	0	0	0	0	0	0	0	0	1.86944	1.24562	2.01502	0	0.987061	0.040328	0	0	3.2393	3.33198	0	0	0.92213	0	0	0	0	0	1.39114	1.57644	0	0	0	2.4937	0	1.81629	0	0	0
NAGLIPASYN-PWY: lipid IVA biosynthesis|g__Neisseria.s__Neisseria_sicca	0	0.91232	0	1.60135	0	4.39315	1.19785	1.13218	0	1.25243	1.93136	14.2642	0	0	0.884471	0	0	4.46888	3.34417	6.18622	3.84666	2.88514	4.4625	2.37202	0	0	14.4273	33.4751	0	0	9.10361	0	4.90733	22.0513	0	4.8911	5.86962	3.7173	0.712855	24.097	4.06698	4.24761	2.10048	0	3.47414	0	0
NAGLIPASYN-PWY: lipid IVA biosynthesis|g__Neisseria.s__Neisseria_sp_oral_taxon_014	0	0	0	0	0	0	0	0	0	0	0	0	0	0	0	0	0	0	0	0	0	0	0	0	0	0	0	0	0	0	0	0	0	0	0	0	0	0	0	0	0.366991	0	0	0	0	0	0
NAGLIPASYN-PWY: lipid IVA biosynthesis|g__Neisseria.s__Neisseria_subflava	0	4.30731	0	0	0	0	0	0	0	0	1.72182	3.95737	0	5.23066	0	0	0	0	3.51646	1.98061	0	0	0	2.58729	0	0	0	6.32871	2.47292	6.02465	9.50153	0	7.90416	13.7046	0	0	0	23.7847	5.16181	3.51388	9.70381	0	0	0.832621	0	0	0
NAGLIPASYN-PWY: lipid IVA biosynthesis|unclassified	0	0	8.2804	0	0	0	0	0	0	0	0	0	0	0	0	0	0	0	0	0	0	0	3.1173	1.52958	0	0	0	7.27771	0	0	0	0	0	0	0	0	3.56992	0	2.00804	0	5.06351	0	0	0	0	0	0
NONMEVIPP-PWY: methylerythritol phosphate pathway I	669.748	610.508	463.049	595.042	712.475	409.469	400.861	640.078	651.953	720.866	434.999	537.306	499.52	467.02	505.438	546.972	656.536	299.143	374.354	406.7	547.564	544.832	524.806	642.107	699.486	635.053	264.035	398.086	531.467	568.232	367.395	472.221	521.042	450.788	481.093	670.647	400.838	320.235	520.072	423.572	525.254	416.28	298.426	513.201	405.885	539.446	493.271
NONMEVIPP-PWY: methylerythritol phosphate pathway I|g__Actinomyces.s__Actinomyces_graevenitzii	1.26514	0	9.43565	0	0	0	0	0	0	0	0	0	0	0	0.288196	0	0	0.653539	0	0	0	0	0.971759	1.48093	2.05576	1.63596	0	0	0	0	0.4369	1.7643	0	0	0	0	0.972562	3.44188	3.77623	0.640708	0	0	0	0	0	0.763101	0
NONMEVIPP-PWY: methylerythritol phosphate pathway I|g__Actinomyces.s__Actinomyces_massiliensis	0	0	0	0	0	0	0	0	0	0	0	0	0	0	0	0	0	0	0	0	0	0	0	0.19768	0	0	0	0	1.60827	0.610291	0	0	0	0	0	0	0	0	0	0	0	0	0	0	0	0	0
NONMEVIPP-PWY: methylerythritol phosphate pathway I|g__Actinomyces.s__Actinomyces_naeslundii	0	1.37888	0	0	0	0	0	0	0	0	0	0	0	0	0	0	0.895878	0	0	0	0	0	0	0.830687	0	0	0	0	0	0	0	0	0	0	0	0.96383	0.235961	0	0	0	0.601278	0	0	0	0	0	0
NONMEVIPP-PWY: methylerythritol phosphate pathway I|g__Actinomyces.s__Actinomyces_sp_HPA0247	0	0	0	0	0	0	0	0	0	0	0	0	0	0	2.45061	27.8265	0	0	0	0	0	0	0	2.89841	0	0	0	0	0	0	0	0	0	0	0	0	0	0	6.51336	13.1836	0	0	0	0	0	0	0
NONMEVIPP-PWY: methylerythritol phosphate pathway I|g__Actinomyces.s__Actinomyces_sp_ICM39	0	9.38862	0	0	0	0	0	0	0	0	0	0	0	0	0	0	0	0	0	0	0	0	0	3.27401	0	0	0	0	0	0	0	0	0	0	0	0	0	0	0	0	0	0	0	0	0	0	0
NONMEVIPP-PWY: methylerythritol phosphate pathway I|g__Actinomyces.s__Actinomyces_sp_oral_taxon_172	0	0	0	0	0	0	0	0	0	0	0	0	0	0	0	0	0	0	0	0	0	0	0	9.04324	0	0	0	0	0	0	0	0	0	0	0	0	0	0	0	0	0	0	0	0	0	0	0
NONMEVIPP-PWY: methylerythritol phosphate pathway I|g__Actinomyces.s__Actinomyces_viscosus	0	2.07324	0	0	0	0	0	0	0	0	0	5.47401	0	0	0.682978	0.381744	0.591597	0	0	0	0	0	0.879686	1.70387	0	0	3.88698	5.88078	1.9698	1.15271	0.673738	0	0	2.11246	0	0	0	0	0.830033	0	0	0	0	0	0	0.996298	0
NONMEVIPP-PWY: methylerythritol phosphate pathway I|g__Alloprevotella.s__Alloprevotella_tannerae	0	0	5.4956	0	0	0	17.1461	3.44996	0	0	7.48277	5.11382	0	2.14953	1.2224	0	0	2.28895	5.44127	0	0	9.4207	0	0.17693	0	64.1603	0	0	0	0	0	0	0	1.01589	9.15091	0	0	0	0	0	2.43121	9.34499	0	3.46143	5.39822	0	0
NONMEVIPP-PWY: methylerythritol phosphate pathway I|g__Atopobium.s__Atopobium_parvulum	2.76552	4.90287	1.88688	2.60462	0	0	4.95068	5.81268	4.48559	0	1.53267	7.29936	0	0	5.91437	4.30436	8.7695	4.27458	1.22526	0	2.42125	5.93515	2.12296	8.51134	0	0	2.17412	0	0	2.85444	0	0	0	1.1048	0	6.61197	0	0	1.07089	2.3592	0	2.55117	2.61458	7.61913	9.06954	6.36163	3.64344
NONMEVIPP-PWY: methylerythritol phosphate pathway I|g__Atopobium.s__Atopobium_rimae	0	7.63577	1.8108	1.45321	0	0	3.36886	0	0	0	1.22139	13.4062	8.13393	0	3.88003	0.962437	0	0	0	0	0	0	1.25029	4.01504	0	0	0	0	0	4.01166	0	0	0	0.823148	0	5.98904	0	1.35634	0	0	0	0.957029	0	8.32964	5.35554	0	0
NONMEVIPP-PWY: methylerythritol phosphate pathway I|g__Bacteroidetes_noname.s__Bacteroidetes_oral_taxon_274	0	0	0	0	0	0	0	0	0	0	0	0	0	0	0	0	0	0	0	0	0	0	1.30418	0	0	0	0	0	0	0	2.89913	0	0	0	0	0	0	0	0	0	0.376209	0	0	0	0	0	0
NONMEVIPP-PWY: methylerythritol phosphate pathway I|g__Campylobacter.s__Campylobacter_concisus	4.45087	4.67553	4.5898	4.77386	3.12887	0	0	0	0	2.37676	3.99297	2.70686	8.98925	8.64012	5.0232	0.218044	0.905826	4.08141	1.04118	7.63703	6.36923	2.49466	1.42825	3.98698	5.2777	2.42258	5.25787	0	2.93627	3.13721	2.12334	8.98459	22.6634	2.6984	0	2.22645	1.54052	3.71788	11.9548	12.3522	3.58502	1.91081	14.5718	1.02327	0	0	1.96682
NONMEVIPP-PWY: methylerythritol phosphate pathway I|g__Catonella.s__Catonella_morbi	0	0	0	0	0	0	0	0	0	0	0	0	0	0	0	0	0	0	0	0	0	0	0	0	0	0	0	0	0	0	0.79705	0	0	0	0	0	0	0	0	0	0.790159	0	0	0	0	0	0
NONMEVIPP-PWY: methylerythritol phosphate pathway I|g__Corynebacterium.s__Corynebacterium_durum	0	0	0	0	0	0	0	0	0	0	0	0	0	0	0	0	0	0	0	0	0	0	0	0.210521	0	0	0	0	0	0	0	0	0	0.59555	0	0	0	0	0	0	0	0	0	0	0	0	0
NONMEVIPP-PWY: methylerythritol phosphate pathway I|g__Corynebacterium.s__Corynebacterium_matruchotii	0	0	0	0	0	0	0	0	0	0	0	0	0	0	0	0	0	0	0	0	0	0	0	0	0	0	0	0	1.21464	0	0	0	0	0	0	0	0	0	0	0	0	0	0	0	0	0	0
NONMEVIPP-PWY: methylerythritol phosphate pathway I|g__Cryptobacterium.s__Cryptobacterium_curtum	0	0	0	0	0	0	0	0	0	0	0	2.32434	0	0	0.463777	0	0	0	0	0	0	0	0	0	0	0	0	0	0	0	0	0	0	0	0	1.96122	0	0	0	0	0	0	0	0	0	0	0
NONMEVIPP-PWY: methylerythritol phosphate pathway I|g__Eikenella.s__Eikenella_corrodens	0	0	0	0	0	0	0	0	0	0	0	0	0	0	0	0	0	0.793099	0	0	0	0	0	0.109138	0	0	0	0	0	0	0	0	0	0	0	0	0	0	0	0	0	0	0	0	0	0	0
NONMEVIPP-PWY: methylerythritol phosphate pathway I|g__Enhydrobacter.s__Enhydrobacter_aerosaccus	0	0	0	0	0	0	0	0	0	0	0	0	0	0	0	0	0	0	0	0	0	0	0	0.0552453	0	0	0	0	0	0	0	0	0	0	0	0	0	0	0	0	0	0	0	0	0	0	0
NONMEVIPP-PWY: methylerythritol phosphate pathway I|g__Eubacterium.s__Eubacterium_saphenum	0	0	0	0	0	0	0	0	0	0	0	0	0	0	0.965284	0	0	0	0	0	0	0	0	0	0	0	0	0	0	0	0	0	0	0	0	0	0	0	0	0	0	0	0	0	0	0	0
NONMEVIPP-PWY: methylerythritol phosphate pathway I|g__Fusobacterium.s__Fusobacterium_necrophorum	0	0	0	0	0	0	0	0	0	0	0	0	0	0	0	0	0	0	0	0	0	0	0	0	0	0	0	0	0	0	0	7.10602	0	0	0	0	0	0	0	0	0	0	0	0	0	0	0
NONMEVIPP-PWY: methylerythritol phosphate pathway I|g__Fusobacterium.s__Fusobacterium_nucleatum	0	5.02827	0	0	1.14411	0	0	2.75241	2.1268	0	0	3.49704	0	4.59302	3.01932	3.19954	5.93112	6.39548	8.75867	3.9156	2.95271	0	6.22094	5.96573	0	2.78369	7.70096	0	2.12348	1.50555	3.91797	3.18907	0	3.91673	1.63598	1.87181	2.5305	4.99156	2.67435	2.4032	3.98425	0	0	3.76998	0	1.6971	1.87029
NONMEVIPP-PWY: methylerythritol phosphate pathway I|g__Haemophilus.s__Haemophilus_haemolyticus	0	0	0	0	0	0	1.18475	0	0	0	0	0	0	0	0	0	0	0	0	0.925855	0	0	0	0	0	0	0	2.05534	0	0	0.945315	0	3.48682	0	0	0	1.09807	0	0	0	0	0	0	0	0	0	0
NONMEVIPP-PWY: methylerythritol phosphate pathway I|g__Haemophilus.s__Haemophilus_influenzae	0	0	0	0	0	8.74002	0	0	0	0	0	0	0	1.86139	0	3.78749	0	0	0	0	0	0	0	0	0	0	0	0	0	0	0	0	2.7642	0	0	0	0.316533	0	0	0	0	0	0	0	0	0	0
NONMEVIPP-PWY: methylerythritol phosphate pathway I|g__Kingella.s__Kingella_denitrificans	0	0	0	0	0	0	0	0	0	0	0	0	0	0	0	0	0	0	0	1.68732	0	0	0	0	0	0	0	0	0	0	0	0	0	0	0	0	0.279194	0	0	0	0	0	0	0	0	0	0
NONMEVIPP-PWY: methylerythritol phosphate pathway I|g__Oribacterium.s__Oribacterium_sinus	0	1.77161	0	0	0	0	0	0	0	0	1.85959	8.48996	0	8.1732	2.07397	2.44288	1.33965	5.54232	1.64094	0	1.10918	3.51941	0	0.152608	0	0	0	0	1.9194	7.12438	2.6016	0	2.00761	1.20249	1.95403	0	5.03473	0	10.032	6.06633	4.30019	0	8.21563	0	0	4.35989	0
NONMEVIPP-PWY: methylerythritol phosphate pathway I|g__Oribacterium.s__Oribacterium_sp_ACB1	0	0	11.0325	0	0	0	0	0	0	0	0	0	0	0	0	2.07165	0	0	0	0	0	0	0	0	0	0	0	0	0	0	0	0	0	0	0	0	5.4363	0	0	0	0	0	0	0	0	0	0
NONMEVIPP-PWY: methylerythritol phosphate pathway I|g__Oribacterium.s__Oribacterium_sp_ACB8	0	0	0	0	0	0	0	0	0	4.51858	0	0	0	0	0	0	0	2.58332	0	0	0	0	0	0	0	0	0	0	0	0	0	0	0	0	0	0	0	0	0	0	0	0	0	0	0	0	0
NONMEVIPP-PWY: methylerythritol phosphate pathway I|g__Parvimonas.s__Parvimonas_micra	0	1.471	0	0	0	0	0	0	9.38259	0	8.40574	0	0	0	6.49307	0	0	0	0	0	0	0	8.39903	0.893785	0	1.96602	0	0	0	0	0	0	0	1.26673	0	1.18782	0	0	0	0	0	4.95955	0	0	2.18506	0	0
NONMEVIPP-PWY: methylerythritol phosphate pathway I|g__Peptostreptococcus.s__Peptostreptococcus_stomatis	0	0	0	0	0	0	0	0	0	0	0	0	0	0	0	0	2.06602	0	0	0	0	0	6.81463	0	0	0	0	0	0	0	0	0	0	0	0	0	0	0	0	0	0	0	0	0	0	0	0
NONMEVIPP-PWY: methylerythritol phosphate pathway I|g__Porphyromonas.s__Porphyromonas_catoniae	0	1.04347	0	0	0	0	0	0	0	2.00493	0	0	0	0	1.78796	0.400067	0	0	2.29627	1.70061	0	0	1.46777	2.11635	0	0	0	0	0	0	0	0	0	0	0	0	3.5525	0	0	0	2.03473	2.53613	0	0	0	0	0
NONMEVIPP-PWY: methylerythritol phosphate pathway I|g__Porphyromonas.s__Porphyromonas_endodontalis	0	0	0	0	0	0	0	0	0	0	0	0	0	0	0.688398	0	0	0	1.62339	0	0	0	0	0	0	0	0	0	0	0	0	0	0	0	0	0	0	0	0	0	0.71015	1.08419	0	0	0	0	0
NONMEVIPP-PWY: methylerythritol phosphate pathway I|g__Prevotella.s__Candidatus_Prevotella_conceptionensis	0	0	0	0	0	0	0	0	0	0	0	0	0	0	0	0	0	0	0	0	0	0	0	0.161451	0	0	0	0	0	0	0	0	0	0.552148	0	0	0	0	0	0	0	0	0	0	0	0	0
NONMEVIPP-PWY: methylerythritol phosphate pathway I|g__Prevotella.s__Prevotella_buccae	0	0	0	0	0	0	0	0	0	0	0	0	0	0	0	0	0	0	0	0	0	0	0	0	0	0	0	0	0	0	0	0	0	0	0	0	0	0	0	0	0	0	0	0	1.32858	0	0
NONMEVIPP-PWY: methylerythritol phosphate pathway I|g__Prevotella.s__Prevotella_maculosa	0	0	0	0	0	0	0	0	0	0	0	0	0	0	0.566376	0	0	0	0	0	0	0	0	0.518131	0	0	0	0	0	0	0	0	0	0	0	0	0	0	0	0.591322	0	0	0	0	0	0	0
NONMEVIPP-PWY: methylerythritol phosphate pathway I|g__Prevotella.s__Prevotella_melaninogenica	54.0718	177.625	64.9077	222.878	47.5836	49.9717	71.2108	194.055	196.265	251.047	25.7922	74.7792	28.4304	77.4933	32.6748	49.8326	158.771	29.901	91.8088	89.5094	132.433	42.6066	40.2527	39.726	219.666	168.64	37.4222	55.1583	98.1758	57.5754	27.6008	0	71.1558	34.2138	78.5949	33.2747	17.6484	20.1999	58.3718	53.8497	65.9831	71.4489	28.695	87.0308	41.8679	96.0563	129.767
NONMEVIPP-PWY: methylerythritol phosphate pathway I|g__Prevotella.s__Prevotella_micans	0	0	0	0	0	0	0	0	0	0	0	0	0	0	0	0	0	0	0	0	0	0.606605	0.889637	1.07183	0	0	0	0	0	0	0	0	0	0	0	0	0	0	0	0	0	2.76632	0	0	0	3.29005	0
NONMEVIPP-PWY: methylerythritol phosphate pathway I|g__Prevotella.s__Prevotella_oulorum	0	1.46251	12.0011	18.7432	7.78106	0	3.87761	2.80355	0	3.2159	0	2.513	7.09881	1.22316	6.36296	1.66681	1.16885	1.35551	1.43682	0	0	3.86776	1.04216	0.133655	6.81659	0	1.52994	0	0	2.07996	0	0	15.2186	0	0	0	0	0	1.00291	9.01466	0	4.12778	16.9702	0	0	4.12499	1.72749
NONMEVIPP-PWY: methylerythritol phosphate pathway I|g__Prevotella.s__Prevotella_pleuritidis	0	0	0	0	0	0	0	0	0	0	0	0	0	0	0	0	0	0	0	0	0	0	4.17868	0	0	0	0	0	0	0.39943	3.49217	1.98759	0	0	0	0	0	0	0	0	0	0	0	0	3.42459	0	0
NONMEVIPP-PWY: methylerythritol phosphate pathway I|g__Prevotella.s__Prevotella_saccharolytica	0	0	0	0	0	0	0	0	0	0	0	0	0	0	0	0	0	0	1.42062	0	0	0	1.03982	0.137169	0	0	0	0	0	0	0	0	0	0	0	0	0	0	0	0	0	0	0	0	0	0	0
NONMEVIPP-PWY: methylerythritol phosphate pathway I|g__Prevotella.s__Prevotella_salivae	117.754	0	1.47958	74.123	40.0633	9.95017	13.6136	24.2921	12.2905	25.0409	20.7736	4.81869	112.263	9.20816	22.5065	16.6134	7.56194	0	5.73823	17.429	9.55784	51.6764	10.4908	18.5922	39.5102	34.8918	0	0	0	27.4626	0	17.9266	20.2548	0	24.9863	20.0532	0	0	12.6213	1.44995	2.45158	7.84632	3.08402	13.6812	19.4083	13.7199	8.44876
NONMEVIPP-PWY: methylerythritol phosphate pathway I|g__Propionibacterium.s__Propionibacterium_propionicum	0	0	0	0	0	0	0	0	0	0	0	0	0	0	0	0	0	0	0	0	0.513873	0	1.01733	0.536352	0	0	0	0	0	0	0	0	0	0	0	0	0	0	0.424257	0	1.12105	0	0	0	0	0	0
NONMEVIPP-PWY: methylerythritol phosphate pathway I|g__Rothia.s__Rothia_aeria	0	0	0	0	0	0	0	0	0	0	0	4.19103	0	0	0	0	0	0	1.90135	0	2.22873	0	2.88794	0.580597	0	0	26.2418	6.11966	1.35699	0	2.8603	0	0	5.98721	0	1.04596	3.08265	0	2.21704	4.19951	1.72868	0	0	0	0	0	0
NONMEVIPP-PWY: methylerythritol phosphate pathway I|g__Rothia.s__Rothia_dentocariosa	0	0	0	0	0	6.12225	0	0	1.5902	0	0	0	0	0.941813	0	0.257551	0	0	0	0	1.87841	0	3.62388	0.201319	0	0	14.7036	4.46219	0	0	0	6.20682	0	11.4572	0	0	3.64413	0	6.9272	1.71657	1.66358	0	0	0	0	0	0
NONMEVIPP-PWY: methylerythritol phosphate pathway I|g__Selenomonas.s__Selenomonas_sputigena	0	0	0	0	0	0	0	0	0	0	0	0	0	0	0	0	0	0	0	3.14269	0	0	0	0	0	0	0	0	0	0	0	0	0	0	0	0	0	0	0	0.77007	0	0	0	0	0	0	0
NONMEVIPP-PWY: methylerythritol phosphate pathway I|g__Shuttleworthia.s__Shuttleworthia_satelles	0	0	0	0	0	0	0	0	0	0	0	0	0	0	0.361471	0	0	0	0	0	0	0	0	0	0	0	0	0	0	0	0	0	0	0	0	0	0	0	0	0	0	0	0	0	0	0	0
NONMEVIPP-PWY: methylerythritol phosphate pathway I|g__Solobacterium.s__Solobacterium_moorei	6.16652	4.89253	0	0	8.51076	4.9483	9.26422	0	0	0	6.75593	4.55138	8.68015	0	4.18319	8.92182	13.5706	0	2.58344	0	3.54669	7.51481	3.45799	20.8758	0	10.7866	0	0	0	2.98649	0.862003	0	0	3.27842	0	6.81045	0	0	2.20417	2.75501	4.57425	4.68247	5.54592	0	5.66004	12.3543	0
NONMEVIPP-PWY: methylerythritol phosphate pathway I|unclassified	60.8866	101.381	92.6806	62.1011	62.6907	0	70.6215	114.915	97.093	32.7081	93.5041	62.543	41.4289	47.4063	31.6236	106.272	104.951	34.8419	44.5083	85.0966	110.431	80.4846	58.0679	150.362	91.4759	120.019	14.44	47.21	41.3623	53.7859	30.7397	38.3439	81.479	34.1416	112.955	78.3581	125.749	25.3376	55.2972	50.0289	85.1834	67.5787	16.2942	103.066	32.1975	81.0196	38.375
NONOXIPENT-PWY: pentose phosphate pathway (non-oxidative branch)	94.1031	264.935	304.583	151.941	111.104	263.113	225.144	204.994	160.487	200.601	184.245	361.524	144.958	252.629	230.856	220.899	233.107	221.593	249.238	215.981	342.338	126.403	252.29	152.854	123.632	164.073	270.718	242.062	253.463	242.444	287.478	217.73	307.748	324.674	188.31	244.674	303.123	184.289	291.474	354.265	261.48	270.497	199.043	227.531	187.187	270.561	170.963
NONOXIPENT-PWY: pentose phosphate pathway (non-oxidative branch)|g__Abiotrophia.s__Abiotrophia_defectiva	1.85656	0.520657	1.45963	0	0	0	0.80051	0	0	0	1.7233	3.80874	0	0	1.85091	1.29405	2.24043	5.41732	5.29681	1.53699	1.17045	1.31171	2.03918	2.14	0	0	7.48945	6.0749	0.720072	0	0	0	0	2.38966	1.18806	1.40577	5.88413	3.18299	0	1.15286	0.566325	8.33508	0	2.1671	2.24687	1.339	0
NONOXIPENT-PWY: pentose phosphate pathway (non-oxidative branch)|g__Actinomyces.s__Actinomyces_sp_oral_taxon_448	0	0	0	0	0	0	0	0	0	0	0	0	0	0	2.99265	0	0	0	0	0	0	0	0	0.241921	0	0	0	0	0	0	0	0	0	0	0	0	0	0	0	0	0	0	0	0	0	0	0
NONOXIPENT-PWY: pentose phosphate pathway (non-oxidative branch)|g__Campylobacter.s__Campylobacter_gracilis	0	0	0	0	0	0	0	0	0	0	0	0	0	0	0.235819	0	0	0	0	0.590711	0	0	0	1.00985	0	0	0	0	0	0	1.71535	0	0	0	0	0	0	0	0.594034	0	0.709437	0.423284	0	0	0	0	0
NONOXIPENT-PWY: pentose phosphate pathway (non-oxidative branch)|g__Campylobacter.s__Campylobacter_showae	0	5.34616	1.29066	0	0	0	0	0	0	0	0	0.937257	0	0	0	0	1.64642	1.07896	1.18889	1.6191	0.461221	0	0	0.397204	0	0.419889	0	0	1.16464	0.209262	0	0	0	0.401188	0	0	0.397244	0.698473	0.301348	0	0.242696	0	0	0	0	0	0
NONOXIPENT-PWY: pentose phosphate pathway (non-oxidative branch)|g__Catonella.s__Catonella_morbi	0	0	0	0	0	0	0	0	0	0	0	0	0	0	0.372043	0	1.4134	1.47509	1.47043	0	0	0	0	0.0410675	0	0	0	0	0	0	0.467274	0	0	0.807335	0	0	0	0	0	0	0.796464	0	0	0	1.38952	0	0
NONOXIPENT-PWY: pentose phosphate pathway (non-oxidative branch)|g__Enhydrobacter.s__Enhydrobacter_aerosaccus	0	0	0	0	0	0	0	0	0	0	0	0	0	0	0	0	0	0	0	0	0	0	0	0.1562	0	0	0	0	0	0	0	0	0	0	0	0	0	0	0	0	0	0	0	0	0	0	0
NONOXIPENT-PWY: pentose phosphate pathway (non-oxidative branch)|g__Fusobacterium.s__Fusobacterium_nucleatum	0	0	0	0	0	0	0	0	0	0	0	2.48033	0	0	0.59103	2.1709	0	0	3.49163	2.38349	0	0	2.45193	1.31589	0	0	4.18662	0	0	0	4.91089	1.25701	0	0	0	0	0	5.95089	0	0	2.56726	0	0	4.80688	0	0	0
NONOXIPENT-PWY: pentose phosphate pathway (non-oxidative branch)|g__Gemella.s__Gemella_haemolysans	0	0.994593	0.76588	1.23484	0	2.77095	3.32395	4.28612	1.47131	1.22649	1.35332	4.84381	0	0.780841	1.96775	1.27087	3.02439	0.918386	1.89464	1.1191	4.46019	1.70289	1.75209	0.231841	0	0	3.0589	0	0.381127	0	1.8015	1.32456	1.73375	3.40677	2.42274	2.97152	2.4615	0	1.03676	2.68532	0.406658	3.1553	0	0	2.71103	0	0
NONOXIPENT-PWY: pentose phosphate pathway (non-oxidative branch)|g__Granulicatella.s__Granulicatella_adiacens	1.7422	0	0	0	0	4.36918	15.6282	0	2.86399	2.33046	1.18114	3.17476	3.06698	0	8.59934	2.83016	5.0012	7.65578	3.61701	0	2.44615	5.73798	1.12819	2.80852	0	2.55263	10.5334	4.30717	11.7007	2.56039	3.14327	3.98623	0	4.2685	0	3.33125	1.04508	8.40007	1.00915	13.3552	0.281172	6.76356	0	0.970217	4.07313	1.01411	0.841484
NONOXIPENT-PWY: pentose phosphate pathway (non-oxidative branch)|g__Granulicatella.s__Granulicatella_elegans	0	0	0	0	0	0	0	0	0	5.32228	0	2.23392	0	0	3.4267	1.41614	0	1.93712	0	0	4.64642	0	0.807832	0	0	0	0	0	0	0	0	0	0	0	0	0	3.61992	0	0	0	0	2.19539	0	0	5.89901	0	0
NONOXIPENT-PWY: pentose phosphate pathway (non-oxidative branch)|g__Lachnospiraceae_noname.s__Lachnospiraceae_bacterium_ICM7	0	2.63446	8.73524	0	0	0	0	0	0	0	0	1.52448	0	0	0	0	0	0.904846	1.12482	0	0.509651	0	1.70138	0.129356	0	0.77313	0	0	7.77673	1.37684	0.56583	0	0	1.8957	0	0	3.26777	0.747056	1.17036	1.34732	3.18791	0.941252	0	2.34894	0.477961	0	0
NONOXIPENT-PWY: pentose phosphate pathway (non-oxidative branch)|g__Lachnospiraceae_noname.s__Lachnospiraceae_oral_taxon_107	0	0.868436	0	0	0	0	0	0	0	0	0	0	0	0	0	0	0	0	0	0	0	0	0	0	0	0	0	0	0	0	0	0	0	0	0	0	0	0	0	0.427234	0	0	0	0	0	0	0
NONOXIPENT-PWY: pentose phosphate pathway (non-oxidative branch)|g__Lautropia.s__Lautropia_mirabilis	0	0	1.13084	0.730833	0	0	0.999295	1.35349	0	0	0	6.6523	0	1.35934	0.76684	1.0818	0	5.62547	0.80786	0	3.37293	0	3.43204	0.846665	0	0	0	8.8391	9.07478	3.68461	18.6472	6.48895	2.99373	8.10949	0	0	1.66017	13.6625	11.3417	10.795	3.48966	0	0	1.6346	0	0.417121	0
NONOXIPENT-PWY: pentose phosphate pathway (non-oxidative branch)|g__Oribacterium.s__Oribacterium_sinus	0	1.30541	0	0	1.90787	10.2896	0	0	2.99055	0	3.2585	12.5342	0	11.4338	3.86929	4.44245	1.63593	6.11897	0.942217	0	3.08757	2.84091	2.45877	0.513338	2.22896	1.83655	1.78445	3.50397	2.03477	8.86752	3.81027	0	5.28072	1.90848	0	1.82294	5.25904	0	11.5205	6.7786	6.82071	0	10.0846	0	1.42162	0	2.95664
NONOXIPENT-PWY: pentose phosphate pathway (non-oxidative branch)|g__Oribacterium.s__Oribacterium_sp_ACB1	0	0	12.0701	0	0	0	0	0	0	0	0	0	0	0	0	3.54826	0	0	0	0	0	0	0	0	0	0	0	0	0	0	0	0	0	0	0	0	3.74097	0	0	0	0	0	0	0	0	0	0
NONOXIPENT-PWY: pentose phosphate pathway (non-oxidative branch)|g__Oribacterium.s__Oribacterium_sp_ACB8	0	0	0	0	0	0	0	0	0	9.32353	0	0	0	0	0	0	0	0	0	0	0	0	0	0	0	0	0	0	0	0	0	0	0	0	0	0	0	0	0	0	0	0	0	0	0	0	0
NONOXIPENT-PWY: pentose phosphate pathway (non-oxidative branch)|g__Oribacterium.s__Oribacterium_sp_oral_taxon_078	0	0	0	0	0	0	0	0	0	0	0	0	0	0	0	0	0	0	0	0	0	0	0	0.0974873	0	0	0	0	0	0	0	0	0	0	0	0	0	0	0	0.41584	0	0	0	0	0	0	0
NONOXIPENT-PWY: pentose phosphate pathway (non-oxidative branch)|g__Parvimonas.s__Parvimonas_micra	0	14.1539	2.56601	0	0	5.70075	9.25123	0	21.5821	3.43759	34.4476	0	0	6.69825	8.18117	3.83923	0	0	4.17673	0	0	3.58312	9.84105	0.810714	0	6.57228	0	6.16854	0	0	1.73681	3.63517	0	2.65447	12.2783	2.34814	9.90432	0	0	0	3.51409	9.99032	0	9.47012	4.36543	0	0
NONOXIPENT-PWY: pentose phosphate pathway (non-oxidative branch)|g__Parvimonas.s__Parvimonas_sp_oral_taxon_110	0	0	0	0	0	0	0	0	0	0	0	0	0	0	0	9.03356	0	0	0	0	0	0	0	1.0293	0	0	0	0	0	0	0	0	0	0	0	3.65084	0	0	0	0	0	0	0	0	0	0	0
NONOXIPENT-PWY: pentose phosphate pathway (non-oxidative branch)|g__Peptostreptococcaceae_noname.s__Eubacterium_yurii	0	1.33298	0	0	0	0	0	0	0	0	0	0	0	0	0	0	0	0	0	0	0	0	0	0	0	0	0	0	0	0	0	0	0	0	0	0	0	0	0	0	0	0	0	0	0	0	0
NONOXIPENT-PWY: pentose phosphate pathway (non-oxidative branch)|g__Peptostreptococcus.s__Peptostreptococcus_stomatis	0	1.89119	5.50765	4.11741	0	0	5.15478	2.98587	0	2.02342	5.81476	0	0	0	0	2.40042	9.39106	2.1348	0	2.09478	0	0	6.46354	3.29584	2.29164	5.55964	0	0	0	1.02746	0	0	2.10437	0	3.24504	0	4.74709	0	0	0	0	3.36455	0	4.41442	1.81734	1.52238	0
NONOXIPENT-PWY: pentose phosphate pathway (non-oxidative branch)|g__Porphyromonas.s__Porphyromonas_endodontalis	0	0	0	0	0	0	0	0	0	0	2.83918	0	0	1.01534	1.34145	0	0	0.74514	1.65634	0	0	0	0	0	0	1.47165	0	0	0	0	0	0	0	0	0	0	0	2.60746	0	0	0.934557	0.75512	0.80657	0	0.576067	0	0
NONOXIPENT-PWY: pentose phosphate pathway (non-oxidative branch)|g__Prevotella.s__Prevotella_buccae	0	0	0	0	0	0	0	0	0	0	0	0	0	0	0	0	0	0	0	0	0	0	0	0	0	0	0	0	0	0	0	0	0	0	0	0	0	0	0	0	0	0	0	0.579882	0	0	0
NONOXIPENT-PWY: pentose phosphate pathway (non-oxidative branch)|g__Prevotella.s__Prevotella_pleuritidis	0	0	0.750357	1.51758	0	0	0	0	0	0	0	0	0	0	0	0	0	0	0	0	0	0	6.35059	0	0	0	0	0	0	0	2.00934	0	0	0	0	0	0	0	0	0	0.897308	0	0	0	0	0	0
NONOXIPENT-PWY: pentose phosphate pathway (non-oxidative branch)|g__Propionibacterium.s__Propionibacterium_propionicum	0	0	0	0	0	0	0	0	0	0	0	1.78926	0	0	0	0	0	0	0	0	1.40632	0	1.7618	0.71487	0	0	0.524349	0	0	0	0	0	0	0	0	0	0.910318	0	0.210441	0	1.31076	0	0	0	0	0.928391	0
NONOXIPENT-PWY: pentose phosphate pathway (non-oxidative branch)|g__Rothia.s__Rothia_dentocariosa	0	0	0	0	0	6.53252	1.5506	0.438465	0	0	0.855754	1.86006	0	1.1403	0	0.35387	1.05915	1.74705	1.19387	0.360471	1.16888	0	5.05502	0.192431	0	0	9.32488	0	0	1.67588	0	3.82688	4.97102	8.38763	1.42648	1.8633	4.01748	0	7.46337	1.08507	1.13752	1.59095	0	0	0	0	0
NONOXIPENT-PWY: pentose phosphate pathway (non-oxidative branch)|g__Selenomonas.s__Selenomonas_flueggei	0	0	5.59741	9.12767	2.93439	0	0	0	2.46951	2.2722	5.84695	2.05394	3.30011	1.5588	0.622717	0	0	0	3.28487	9.79088	4.07607	10.7506	4.06308	1.53405	3.06741	0	0	0	0	0	0	16.426	59.2739	0	0	0	0	0	6.18068	5.35186	0.658373	4.36328	8.7032	0	1.84996	4.34901	0
NONOXIPENT-PWY: pentose phosphate pathway (non-oxidative branch)|g__Selenomonas.s__Selenomonas_noxia	0	2.8735	0	8.18008	0	0	0	0	0	0	1.19776	3.12226	2.9861	0	0.448786	0.318055	7.12248	0	2.21011	1.56231	0	1.95884	0	3.41753	0	0	1.21747	0	0	1.56624	0.619524	5.70656	0.952852	1.27173	0	0.953168	0.182741	0	1.27358	0.988961	0.481332	2.6212	9.00596	2.70875	0	4.49544	8.71499
NONOXIPENT-PWY: pentose phosphate pathway (non-oxidative branch)|g__Treponema.s__Treponema_medium	0	0	0	0	0	0	0	0	0	0	0	0	0	0	0.420942	0	0	0	0	0	0	0	0	0	0	0	0	0	0	0	0	0	0	0	0	0	0	0.647613	0	0	0	0	0	0	0	0	0
NONOXIPENT-PWY: pentose phosphate pathway (non-oxidative branch)|g__Treponema.s__Treponema_socranskii	0	0	0	0	0	0	0	0	0	0	0	0	0	0	0	0	0	0	0	0	0	0	1.16054	0.214828	0	0	0	0	0	0	0.896737	0	0	0	0	0	0	0	0	0	0	0	0	0	0	0	0
NONOXIPENT-PWY: pentose phosphate pathway (non-oxidative branch)|g__Veillonella.s__Veillonella_dispar	24.135	0	60.0612	22.8335	22.8298	54.1816	11.2681	36.2236	25.6999	14.7285	3.48676	38.8385	13.4249	43.313	18.6877	26.2637	13.9673	15.6213	23.5686	9.79591	68.0482	2.93645	17.7572	16.3884	24.8214	6.63349	0	13.3053	54.5695	70.0731	4.3	15.1181	19.7915	7.41936	11.496	22.76	8.96192	3.35069	70.98	51.723	24.0961	10.4012	24.0786	27.1201	15.8632	60.1768	48.9574
NONOXIPENT-PWY: pentose phosphate pathway (non-oxidative branch)|g__Veillonella.s__Veillonella_parvula	0	17.6563	31.156	19.1397	6.58535	15.415	4.66104	16.2464	15.3363	21.6407	7.97834	23.9814	12.7135	2.92977	30.1764	12.5244	34.3499	29.7803	20.5991	13.9183	6.30168	5.21021	6.04503	18.5524	1.60919	7.36761	16.7796	6.60086	17.1164	16.7594	12.2395	19.2377	6.7468	20.4323	5.71108	27.4898	5.23792	3.34272	14.0641	12.3576	12.938	5.60221	5.32907	31.4479	28.1823	44.7473	13.4202
NONOXIPENT-PWY: pentose phosphate pathway (non-oxidative branch)|g__Veillonella.s__Veillonella_sp_oral_taxon_158	0	0	0	0	0	0	0	0	0	0	0	0	0	0	0	0	0	0	0	0	0	0	0	0	0	0	0	0	0	0	0	0	0	0	0	0	0	0	0	0	0	25.5778	0	0	0	0	0
NONOXIPENT-PWY: pentose phosphate pathway (non-oxidative branch)|unclassified	10.0622	52.6292	44.9016	26.6603	15.1583	0	42.7421	45.0504	0	20.923	35.4621	37.0649	34.5822	33.0163	24.6082	34.493	48.5295	13.2013	29.131	69.1164	50.1233	11.0092	20.8454	21.6616	31.1797	53.1422	10.228	16.1832	23.3783	29.6498	18.2877	26.9365	64.3674	22.1112	71.8688	64.0745	82.0844	22.9292	27.0692	32.1664	56.3749	12.953	33.1807	40.1411	18.1862	52.2111	16.1519
OANTIGEN-PWY: O-antigen building blocks biosynthesis (E. coli)	117.238	211.376	158.309	111.237	103.927	250.575	185.898	206.298	127.37	192.058	152.799	290.46	270.515	207.182	197.207	206.729	213.361	191.033	206.975	153.085	248.102	161.561	167.924	162.2	129.031	128.664	253.116	252.85	240.98	208.944	289.275	217.496	272.46	269.396	229.06	167.263	172.293	284.952	189.678	290.52	213.422	211.785	154.522	165.663	182.82	136.068	151.551
OANTIGEN-PWY: O-antigen building blocks biosynthesis (E. coli)|g__Acidovorax.s__Acidovorax_ebreus	0	0	0	0	0	0	0	0	0	0	0	0	0	0	0	0	0	0	0	0	0	0	0	0.363846	0	0	0	0	0	0	0	0	0	0	0	0	0	0	0	0	0	0	0	0	0	0	0
OANTIGEN-PWY: O-antigen building blocks biosynthesis (E. coli)|g__Capnocytophaga.s__Capnocytophaga_granulosa	0	0	0	0	0	0	0	0	0	0	0	0	0	0	0	0	0	0	0	0	0	0	0	0	0	0	0	0	0	0	0	0.756391	0	0	0	0	0	0	0	0	0	1.31123	0	0	0	0	0
OANTIGEN-PWY: O-antigen building blocks biosynthesis (E. coli)|g__Escherichia.s__Escherichia_coli	0	0	0	0	0	0	0	0	0	0	0	0	0	0	0	0.484027	0	0	0	0	0	0	0	0.216013	0	0	0	0	0	0	0	0	0	0	0	0	0	0	0	0	0	0	0	0	0	0	27.1579
OANTIGEN-PWY: O-antigen building blocks biosynthesis (E. coli)|g__Fusobacterium.s__Fusobacterium_nucleatum	0	5.7061	0.768657	0	0	3.0931	0	2.08892	1.81538	1.11375	3.28959	6.68124	0	4.27619	0	0	3.52789	7.59537	8.64005	4.7426	0	0	1.99248	6.83892	0	2.47125	3.53013	1.67375	3.27711	3.63937	7.49218	2.32175	2.56447	4.19085	0	0	0.967212	8.31549	2.56152	2.10996	5.44959	6.55551	3.22444	0	5.22776	0	1.91391
OANTIGEN-PWY: O-antigen building blocks biosynthesis (E. coli)|g__Neisseria.s__Neisseria_subflava	0	8.33108	0	0	0	0	1.19488	0	0	0	0	4.85878	0	10.3682	0	0	0	0	0	2.13654	0	0	0	4.38492	0	0	0	25.7877	7.49937	9.90613	29.6623	0	0	8.38449	0	0	0	29.935	4.79545	2.89996	17.8107	0	0	0	0	0	0
OANTIGEN-PWY: O-antigen building blocks biosynthesis (E. coli)|g__Streptococcus.s__Streptococcus_pyogenes	0	0	0	0	0	0	0	0	0	0	0	0	0	0	0	0	0	0	0	0	0	0	0	0.0597186	0	0	0	0	0	0	0	0	0	0	0	0	0	0	0	0	0	0	0	0	0	0	0
OANTIGEN-PWY: O-antigen building blocks biosynthesis (E. coli)|unclassified	0	13.4858	7.65609	0	0	0	13.246	13.0479	0	0	17.359	14.146	0	15.0017	7.93051	8.11268	16.8335	11.788	15.4278	0	16.7916	0	3.65268	14.5967	0	10.5184	4.91351	0	15.0448	7.71025	9.77912	0	15.0922	11.3644	22.6102	0	14.551	14.6462	4.69879	7.58664	10.7301	18.4864	0	0	17.929	0	0
ORNARGDEG-PWY: superpathway of L-arginine and L-ornithine degradation	0	0	0	0	0	0	0	0	0	0	0	0	0	0	0	0.546807	0	0	0	0	0	0	0	0.515594	0	0	0	0	0	0	0	0	0	0	0	0	0	0	0	0	0	0	0	0	0	0	27.4318
ORNARGDEG-PWY: superpathway of L-arginine and L-ornithine degradation|g__Escherichia.s__Escherichia_coli	0	0	0	0	0	0	0	0	0	0	0	0	0	0	0	0.351614	0	0	0	0	0	0	0	0.255442	0	0	0	0	0	0	0	0	0	0	0	0	0	0	0	0	0	0	0	0	0	0	24.5997
ORNDEG-PWY: superpathway of ornithine degradation	0	0	0	0	0	0	0	0	0	0	0	0	0	0	0	3.85046	0	0	0	0	0	0	0	1.09376	0	0	0	0	0	0	0	0	0	0	0	0	0	0	0	0	0	0	0	0	0	0	33.9829
ORNDEG-PWY: superpathway of ornithine degradation|g__Escherichia.s__Escherichia_coli	0	0	0	0	0	0	0	0	0	0	0	0	0	0	0	0	0	0	0	0	0	0	0	0.216656	0	0	0	0	0	0	0	0	0	0	0	0	0	0	0	0	0	0	0	0	0	0	21.1899
P101-PWY: ectoine biosynthesis	0	0	0	0	0	0	0	0	0	0	0	0	0	0	0	0	0	0	0	0	0	0	0	0.479942	0	0	0	0	0	0	0	0	0	0	0	0	0	0	0	0	0	0	0	0	0	0	0
P105-PWY: TCA cycle IV (2-oxoglutarate decarboxylase)	8.23729	0	1.79111	0	0	0	0	7.32976	0	0	3.08999	21.5846	3.2315	1.82706	3.66876	4.63219	0	10.2766	1.64903	3.29066	10.8628	0	11.3766	13.4543	0	0	0	0	14.9187	12.8633	1.51371	21.4212	8.86412	2.46895	0	10.744	0	13.3473	31.9008	26.1598	8.91266	2.81476	0	1.77463	4.8433	7.77252	48.4147
P105-PWY: TCA cycle IV (2-oxoglutarate decarboxylase)|g__Escherichia.s__Escherichia_coli	0	0	0	0	0	0	0	0	0	0	0	0	0	0	0	0	0	0	0	0	0	0	0	0.0850633	0	0	0	0	0	0	0	0	0	0	0	0	0	0	0	0	0	0	0	0	0	0	0
P105-PWY: TCA cycle IV (2-oxoglutarate decarboxylase)|unclassified	0	0	0	0	0	0	0	0	0	0	0	0	0	0	0	0	0	0	0	0	0	0	0	0.552892	0	0	0	0	0	0	0	0	0	0	0	0	0	0	0	0	0	0	0	0	0	0	0
P108-PWY: pyruvate fermentation to propanoate I	0	24.4573	17.0098	0	0	0	0	0	0	0	12.1675	31.589	0	11.5547	3.73942	0	15.7063	6.34095	27.1187	14.4527	13.3419	2.53006	18.5693	13.1752	0	5.98756	14.0993	7.96273	31.8026	8.97159	12.4502	0	11.8724	0.94087	6.33275	0	11.5579	4.20349	1.68168	6.95037	18.5269	29.5781	18.6562	0	12.2842	5.92546	0
P108-PWY: pyruvate fermentation to propanoate I|g__Propionibacterium.s__Propionibacterium_propionicum	0	0	0	0	0	0	0	0	0	0	0	0	0	0	0	0	1.99389	0	0	0	1.30178	0	2.01357	1.0991	0	0	0	0	0	0	0	0	0	0	0	0	1.63958	0	0	0	1.44715	0	0	0	0	0	0
P108-PWY: pyruvate fermentation to propanoate I|unclassified	0	0	0	0	0	0	0	0	0	0	0	0	0	0	0	0	0	0	0	0	0	0	0	0.636244	0	0	0	0	0	0	0	0	0	0	0	0	0	0	0	0	0	0	0	0	0	0	0
P122-PWY: heterolactic fermentation	17.7909	28.8401	31.1135	3.89825	17.0323	61.9681	56.2914	37.1417	16.9153	37.8644	45.1031	75.9252	14.211	26.2459	38.9181	33.5588	27.474	70.3504	64.7042	36.2711	53.5433	22.5384	62.3313	24.3057	4.47857	22.7729	65.7029	103.909	67.4574	54.7724	126.915	10.9767	57.6834	134.084	26.5781	22.614	87.2131	72.565	46.5936	99.2506	65.2625	47.9087	26.1546	53.0384	45.1158	11.0552	31.3672
P122-PWY: heterolactic fermentation|unclassified	0	0	0	0	0	0	0	0	0	0	0	0	0	0	0	0	0	0	0	0	0	0	0	0	0	0	0	0	0	0	0	0	0	6.98444	0	0	5.21106	0	0	0	1.72457	0	0	0	0	0	0
P124-PWY: Bifidobacterium shunt	0	0	0	2.3035	13.0764	5.58427	9.37925	0	0	2.88681	2.46416	16.1651	4.37609	0	22.6145	6.74289	3.99708	16.1889	3.94698	0	7.96776	9.97218	16.1846	12.7063	0	10.7174	0	54.7194	3.90355	0	4.14796	0	4.23862	0	0	22.3924	5.9941	56.8497	0	68.667	0	0	0	8.78047	20.726	0	0
P124-PWY: Bifidobacterium shunt|unclassified	0	0	0	0	0	0	0	0	0	0	0	7.43083	0	0	2.76034	0	0	0	0	0	0	0	10.3519	5.63069	0	0	0	0	0	0	0	0	0	0	0	0	5.3769	0	0	0	0	0	0	0	0	0	0
P125-PWY: superpathway of (R,R)-butanediol biosynthesis	0	0	0	0	0	0	0	0	1.43248	0	0	0	0	0	0.862761	0	1.81638	0	0	0.81896	0.611259	0	0.565181	1.15804	0	0	0	0	0	0	1.83892	0	0	0.350139	0	0.955705	0	0	0	0	0.504471	0	0	1.96894	0	0	0
P161-PWY: acetylene degradation	17.1241	10.3507	38.742	0.939851	3.33132	62.8517	27.1383	15.7364	6.45157	25.1725	21.8702	52.5225	5.16651	8.4305	18.9888	14.5959	12.1514	48.9106	39.19	13.8546	23.4152	9.73215	44.9334	9.3243	2.55125	8.88466	57.0704	46.7102	25.5993	19.0283	59.3272	4.2674	33.9984	59.0876	14.7178	8.40656	43.4871	18.8627	17.4516	60.8426	24.3828	25.4331	29.2971	25.6865	47.8575	16.236	13.2036
P161-PWY: acetylene degradation|g__Neisseria.s__Neisseria_sicca	0	0	0	0	0	0	0	0.855219	0	0	0	0	0	0	0	0	0	6.08603	0	0	0	0	0	0	0	0	0	0	0	0	0	0	0	0	2.47561	0	0	0	0	0	0	0	0	0	0	0	0
P161-PWY: acetylene degradation|g__Streptococcus.s__Streptococcus_sanguinis	2.32449	4.40246	0	0	0	8.65212	6.00635	4.09899	4.13633	0	1.32605	12.9534	0	3.17952	7.90481	3.27359	0	20.7261	0	0	0	4.30136	1.43933	1.03084	0	2.06086	0	13.7296	0	8.81776	0	2.61997	2.37721	8.67303	2.07282	4.17649	13.8357	4.10934	4.3383	8.25552	5.32187	0	12.8287	2.35013	0	0	0.938987
P161-PWY: acetylene degradation|unclassified	5.82799	0	0	0	0	0	0	0	0	0	0	0	0	2.67621	1.01455	0	0	1.7834	4.24939	0	1.32993	0	3.63135	1.36109	0	0	0	0	0	0.715543	3.1614	0	1.84566	5.41479	0	0	4.99604	0	3.99888	2.13349	0.617782	0	0	3.2313	0	0	0
P162-PWY: L-glutamate degradation V (via hydroxyglutarate)	0	2.12608	0	0	5.57547	0	0	0	0	0	3.28645	0	0	0	0.974309	26.2106	0	0.649639	0	0	0	0	0.3757	6.5464	0	0	0	0	0	0	0	0	0	2.57824	0	4.4516	5.03517	0	0	0	0	8.3551	0	6.527	0	0	0
P162-PWY: L-glutamate degradation V (via hydroxyglutarate)|unclassified	0	0	0	0	0	0	0	0	0	0	0	0	0	0	0	0	0	0	0	0	0	0	0	0.292972	0	0	0	0	0	0	0	0	0	0	0	0	0	0	0	0	0	0	0	0	0	0	0
P163-PWY: L-lysine fermentation to acetate and butanoate	11.6552	57.758	41.4824	9.55568	21.4759	17.9895	25.7989	38.8131	38.0687	15.704	47.5168	70.1355	8.27514	44.7557	8.90128	24.4978	44.2954	40.1302	35.2617	33.9715	11.874	31.4068	34.5249	36.4628	27.9956	41.1764	17.761	43.6643	105.872	59.5549	44.6778	14.7622	40.3844	22.1004	18.5289	15.2852	44.7734	91.4603	20.9871	23.6976	63.073	41.5089	10.3113	45.6591	18.4894	13.3104	5.83137
P163-PWY: L-lysine fermentation to acetate and butanoate|g__Fusobacterium.s__Fusobacterium_nucleatum	0	6.10199	0	0	1.51089	7.13563	0	0	5.40455	1.65933	0	12.1263	0	13.1811	4.48741	5.22863	0	7.08701	17.3965	8.85768	5.01687	0	17.2064	10.7583	1.52211	5.44767	12.6727	6.89641	0	7.31682	16.3317	6.71498	3.03797	7.76107	2.85225	6.21813	6.21942	12.9578	4.24668	6.70239	12.4447	11.0295	4.54962	9.04796	5.57142	2.6075	1.46868
P163-PWY: L-lysine fermentation to acetate and butanoate|g__Fusobacterium.s__Fusobacterium_periodonticum	3.36196	30.0772	17.2507	4.90486	7.83338	0	10.2335	11.1489	10.7922	2.31583	20.6606	45.6777	0	23.3071	0	3.33897	12.8028	16.6053	7.95361	13.2427	2.24358	11.0197	6.31637	8.10491	12.1223	10.1934	0	25.3756	73.4688	37.5141	17.2862	0	26.7158	5.06495	6.58972	0	26.0547	62.7223	8.2295	7.77711	34.1977	14.9941	2.86543	16.5035	0	1.70003	0
P164-PWY: purine nucleobases degradation I (anaerobic)	32.3905	122.029	118.941	40.7138	25.5077	53.8269	64.8437	59.557	141.606	79.9198	193.735	75.6022	37.5095	85.7007	58.5154	93.59	61.4006	77.2265	45.7433	59.602	59.16	80.6301	86.321	56.8199	57.8329	81.4445	43.5891	22.1532	61.4363	76.8321	55.2585	79.7875	76.9491	51.0884	157.305	86.7848	101.423	67.6356	75.6005	43.9321	80.5097	94.2931	78.2856	89.6071	60.4854	37.5288	53.8014
P164-PWY: purine nucleobases degradation I (anaerobic)|g__Gemella.s__Gemella_haemolysans	1.18743	0	0	1.58928	0	1.56495	1.06089	2.39285	0.975651	0	0	3.80056	0	0.716105	1.73405	0.143756	1.91086	0.876461	0	1.8144	1.07575	1.2051	1.5108	0.0314956	0.608602	0	2.88	0	0	0	1.0519	0	0.844839	2.9316	0	2.17536	1.46081	0	0.24799	1.35353	0.436086	2.15719	0	0	2.08307	0	0
P164-PWY: purine nucleobases degradation I (anaerobic)|g__Oribacterium.s__Oribacterium_sinus	0	3.48756	0	0	0	9.95001	0	0	0	4.03755	0	12.0347	2.11853	14.2868	5.23512	5.30606	0	7.64241	3.51324	2.29804	0	4.88576	2.79218	0.721817	0	0	0	0	0	11.4278	3.78872	0	5.23581	3.55571	2.80538	0	6.94822	4.85628	14.775	10.3216	6.87989	3.13223	17.5263	0.938599	0	6.9145	4.2346
P164-PWY: purine nucleobases degradation I (anaerobic)|g__Treponema.s__Treponema_medium	0	1.61983	0	0	0	0	0	0	0	0	0	0	0	0.324853	1.08706	0	0	0	0	0	0	0	6.79519	0	0	0	0	0	0	1.1516	0	0	1.59658	0	0	0	0	5.45436	0	0	1.41057	0	0	0.788347	1.62375	0	0
P164-PWY: purine nucleobases degradation I (anaerobic)|g__Treponema.s__Treponema_vincentii	0	0	0	0	0	0	0	0	0	0	0	0	0	0	0	0	0	0	0	0	0	0	0	0	0	0	0	0	0	0	0	0	0	0	0	0	0	0	0	0	0	0.762171	0	0	0	0	0
P164-PWY: purine nucleobases degradation I (anaerobic)|unclassified	0	42.36	0	12.1224	0	0	16.6833	14.0696	10.5903	0	19.8693	6.82549	0	16.7798	4.79831	4.89377	10.3629	8.55634	15.902	24.7347	14.9313	11.525	5.34657	2.08265	11.8642	9.42671	8.75805	11.6052	0	15.6898	8.81589	7.1224	10.0035	7.84352	28.5558	10.2311	48.4122	0	8.63646	6.24353	33.041	7.93004	11.269	20.4306	4.08965	0	9.39674
P185-PWY: formaldehyde assimilation III (dihydroxyacetone cycle)	26.4986	72.3919	132.1	35.4161	31.6208	118.206	92.5238	48.8285	61.5304	53.3229	76.5049	140.91	48.1798	43.653	58.931	91.4708	58.419	100.024	80.1402	71.7701	78.0887	64.9763	139.699	75.4339	40.935	27.2359	122.609	123.79	115.294	103.916	188.496	28.734	96.6485	193.297	34.7245	49.9438	163.487	138.158	111.954	183.257	104.04	95.1805	44.0186	89.9541	97.6619	58.5462	28.3986
P185-PWY: formaldehyde assimilation III (dihydroxyacetone cycle)|unclassified	0	0	0	0	0	0	0	0	0	0	0	0	0	0	0	0	0	0	0	0	0	0	0	0	0	0	0	0	0	4.40157	0	0	0	0	0	0	0	0	0	0	0	0	0	0	0	0	0
P221-PWY: octane oxidation	0	0	0	0	0	0	0	0	0	0	0	0	0	0	0	0	0	0	0	0	0	0	0	0.665713	0	0	0	0	0	0	0	0	0	0	0	0	0	0	0	0	0	0	0	0	0	0	0
P23-PWY: reductive TCA cycle I	0	0	0	0	0	0	0	0	0	0	0	13.868	0	10.8701	0	10.9694	0	18.8723	0	0	0	0	0	5.91559	12.9711	0	0	0	0	4.44636	0	0	18.7159	11.3621	0	0	0	0	0	0	7.51215	0	0	0	0	0	0
P23-PWY: reductive TCA cycle I|unclassified	0	0	0	0	0	0	0	0	0	0	0	0	0	0	0	0	0	0	0	0	0	0	0	2.82415	0	0	0	0	0	0	0	0	0	0	0	0	0	0	0	0	0	0	0	0	0	0	0
P4-PWY: superpathway of L-lysine, L-threonine and L-methionine biosynthesis I	43.3114	155.568	167.608	82.4278	78.1263	201.144	110.681	111.6	88.0498	76.5192	85.7909	274.313	91.027	247.012	116.738	131.944	105.172	145.636	161.402	141.795	234.211	90.142	238.58	129.051	105.516	63.5922	257.676	263.747	246.116	245.604	249.911	111.32	192.819	324.552	75.3958	118.997	177.813	255.662	230.17	243.828	247.269	123.587	100.07	105.697	106.266	71.3408	149.384
P4-PWY: superpathway of L-lysine, L-threonine and L-methionine biosynthesis I|g__Escherichia.s__Escherichia_coli	0	0	0	0	0	0	0	0	0	0	0	0	0	0	0	0	0	0	0	0	0	0	0	0	0	0	0	0	0	0	0	0	0	0	0	0	0	0	0	0	0	0	0	0	0	0	4.66027
P4-PWY: superpathway of L-lysine, L-threonine and L-methionine biosynthesis I|unclassified	0	0	9.83314	0	0	0	13.0518	0	0	0	0	0	0	0	0	12.0819	0	7.19247	4.5812	8.77777	12.1918	0	0	12.4572	0	0	0	17.8985	16.4276	17.3527	12.418	0	9.25881	10.6168	0	0	17.5601	13.1706	8.29744	8.07534	15.1439	0	0	3.96198	0	0	0
P42-PWY: incomplete reductive TCA cycle	26.5223	97.5025	138.832	81.96	40.8945	96.1959	64.5817	39.3708	64.0336	46.7344	47.5031	99.0848	59.36	153.367	62.9858	38.2003	44.4521	79.2995	68.5851	106.732	104.186	53.2561	97.1229	74.4928	78.0106	50.6741	60.5673	119.593	223.737	202.548	138.491	57.4708	118.119	189.241	30.1569	58.3611	107.897	82.3459	182.33	136.306	176.762	42.3076	67.2848	68.9535	58.0942	27.7915	116.695
P42-PWY: incomplete reductive TCA cycle|unclassified	0	0	0	0	0	0	0	0	0	0	0	0	0	0	0	4.69917	0	0	0	0	0	0	0	3.98715	0	0	0	0	0	2.02772	0	0	0	0	0	0	2.30434	0	0	0	0	0	0	0	0	0	0
P441-PWY: superpathway of N-acetylneuraminate degradation	48.642	104.18	100.569	48.7373	44.3396	107.536	93.5546	71.3313	50.8955	65.3201	84.1792	146.613	48.3557	132.601	74.6419	58.2167	89.0239	113.26	96.1366	104.509	110.76	63.6625	103.83	78.2078	32.5219	61.3577	108.067	118.645	82.5942	80.4325	141.822	34.2287	115.031	158.859	52.2328	84.0195	173.894	74.2227	68.692	133.419	128.84	75.015	43.1838	71.8873	102.049	45.9391	61.7257
P441-PWY: superpathway of N-acetylneuraminate degradation|unclassified	0	0	0	0	0	0	0	0	0	0	0	0	0	5.70511	0	0	0	0	0	0	0	0	0	3.38823	0	0	0	0	0	2.55324	0	0	0	9.22299	0	0	12.9004	0	6.33188	0	4.14666	0	0	0	0	0	0
P461-PWY: hexitol fermentation to lactate, formate, ethanol and acetate	20.7712	34.7381	36.5391	10.2634	5.35739	71.645	38.811	15.5425	14.2629	19.3672	30.2441	22.2426	26.1586	25.8906	24.0182	29.9631	15.0085	51.0522	41.599	22.1407	25.3016	33.9537	48.1045	24.5846	17.5047	7.27035	60.6847	12.0577	27.7193	32.1986	43.3081	8.12801	71.535	53.0769	14.6085	23.0948	37.0793	27.1055	26.3296	59.7462	34.3455	38.2397	50.5873	33.2978	43.5129	35.8543	58.0612
P461-PWY: hexitol fermentation to lactate, formate, ethanol and acetate|g__Escherichia.s__Escherichia_coli	2.00627	0	0	0	0	0	0	0	0	0	0	0	0	0	0	0	0	0	0	0	0.715874	0	0	0.439834	0	0	0	0	0	0	0	0	0	0	0	0	0	0	0	0	0	0	0	0	0	0	39.2356
P461-PWY: hexitol fermentation to lactate, formate, ethanol and acetate|g__Lactobacillus.s__Lactobacillus_rhamnosus	0	0	0	0	0	0	0	0	0	0	0	0	0	0	0	0	0	0	0	0	0	0	0	0	0	0	0	0	0	0	0	0	0	0	0	0	0	0	0	0	0	0	0	0.46996	0	0	0
PANTO-PWY: phosphopantothenate biosynthesis I	400.622	463.309	310.951	379.586	427.693	257.741	304.933	479.167	454.602	403.925	311.578	350.447	307.457	349.261	378.74	379.818	533.43	247.91	278.583	285.874	389.615	349.29	390.017	409.4	458.608	472.778	254.616	334.825	434.893	406.329	283.986	323.021	326.242	346.531	381.715	467.261	284.918	305.269	355.448	275.527	397.922	305.806	196.394	318.26	313.268	364.517	397.345
PANTO-PWY: phosphopantothenate biosynthesis I|g__Acidovorax.s__Acidovorax_ebreus	0	0	0	0	0	0	0	0	0	0	0	0	0	0	0	0	0	0	0	0	0	0	0	1.13707	0	0	0	0	0	0	0	0	0	0	0	0	0	0	0	0	0	0	0	0	0	0	0
PANTO-PWY: phosphopantothenate biosynthesis I|g__Acinetobacter.s__Acinetobacter_junii	0	0	0	0	0	0	0	0	0	0	0	0	0	0	0	0	0	0	0	0	0	0	0	0.193968	0	0	0	0	0	0	0	0	0	0	0	0	0	0	0	0	0	0	0	0	0	0	0
PANTO-PWY: phosphopantothenate biosynthesis I|g__Actinobaculum.s__Actinobaculum_sp_oral_taxon_183	0	0	0	0	0	0	0	0	0	0	0	0	0	0	0	0	0	0	0	0	0	0	0	0.0534684	0	0	0	0	0	0	0	0	0	0	0	0	0	0	0	0	0	0	0	0	0	0	0
PANTO-PWY: phosphopantothenate biosynthesis I|g__Actinomyces.s__Actinomyces_georgiae	0	0	0	0	0	0	0	0	0	0	0	0	0	0	0	0	0	0	0	0	0	0	0	1.29206	0	0	0	0	0	0	0	0	0	1.07161	0	0	0	0	0	0.813493	0	0	0	0	0	0	0
PANTO-PWY: phosphopantothenate biosynthesis I|g__Actinomyces.s__Actinomyces_graevenitzii	1.29767	1.23146	11.8541	0	1.13596	0	0	0	0	0	0	0	0	0	0.316525	0	1.22354	1.09192	0	0	0	0	0	1.55352	0	1.36304	0	0	0	0	0	1.39969	0	0	0	0	0.20235	2.01043	3.77313	0	0	0.758526	0	0.790842	0	0	1.63708
PANTO-PWY: phosphopantothenate biosynthesis I|g__Actinomyces.s__Actinomyces_johnsonii	0	0	0	0	0	0	0	0	0	0	0	0	0	0	0	0	0	0	0	0	1.03855	0	0.586357	0.0265432	0	0	0	0	0	0	0	0	0	0.655372	0	0	0	0	0	0.537876	0	0	0	0	0	0	0
PANTO-PWY: phosphopantothenate biosynthesis I|g__Actinomyces.s__Actinomyces_massiliensis	0	0	0	0	0	0	0	0	0	0	0	0	0	0	0	0	0	0	0	0	0	0	0	0.0264416	0	0	0	0	0.773639	0.503292	0	0	0	0	0	0	0	0	0	0	0	0.847128	0	0	0	0	0
PANTO-PWY: phosphopantothenate biosynthesis I|g__Actinomyces.s__Actinomyces_naeslundii	0	1.03283	0	1.0213	0	0	0	0	0	0	0	1.12654	0	0	0.305919	0	0	0	0	0	0	0	0	1.0803	0	0	0	0	0	0	0	0	0	0	0	0	0.140784	1.17274	0.615942	0	0.794742	0	0	0	0	0	0
PANTO-PWY: phosphopantothenate biosynthesis I|g__Actinomyces.s__Actinomyces_odontolyticus	0	1.59251	0	1.40806	1.73387	0	2.42203	1.78107	3.55881	0	1.60502	4.03858	3.50347	4.54532	0	2.2826	4.24623	6.97465	0	0.71156	1.68011	0	0	0.460938	6.35337	0	0	0	1.2861	12.4743	4.00841	0	0	2.37993	4.3549	2.71326	2.78819	11.2619	1.39052	3.59728	4.86798	0	0	2.77287	2.63111	5.89044	2.62921
PANTO-PWY: phosphopantothenate biosynthesis I|g__Actinomyces.s__Actinomyces_sp_HPA0247	0	0	0	0	0	0	0	0	0	0	0	0	0	0	1.0429	29.7635	0	0	0	0	0	0	0	3.07389	0	0	0	0	0	0	0	0	0	0	0	0	0	0	6.08517	10.0222	0	0	0	0	0	0	0
PANTO-PWY: phosphopantothenate biosynthesis I|g__Actinomyces.s__Actinomyces_sp_ICM39	0	6.25437	0	0	0	0	0	0	0	0	0	0	0	0	0	0	0	0	0	0	0	0	0	3.50192	0	0	0	0	0	0	0	0	0	0	0	0	0	0	0	0	0	0	0	0	0	0	0
PANTO-PWY: phosphopantothenate biosynthesis I|g__Actinomyces.s__Actinomyces_sp_ICM47	0	0	0	0	0	0	0	0	0	0	0	0	0	0	5.70881	0	0	0	0	0	0	0	0	12.2831	0	0	0	0	0	0	0	0	0	0	0	0	0	0	3.78498	0	0	0	0	0	0	0	0
PANTO-PWY: phosphopantothenate biosynthesis I|g__Actinomyces.s__Actinomyces_sp_oral_taxon_172	0	0	0	0	0	0	0	0	0	0	0	0	0	0	0	0	0	0	0	0	0	0	0	7.2638	0	0	0	0	0	0	0	0	0	0	0	0	0	0	0	0	0	0	0	0	0	0	0
PANTO-PWY: phosphopantothenate biosynthesis I|g__Actinomyces.s__Actinomyces_sp_oral_taxon_448	0	0	0	0	0	0	0	0	0	0	0	0	0	0	2.49103	0	0	0	0	0	0	0	0	0.249062	0	0	0	0	0	0	0	0	0	0	0	0	0	0	0	0	0	0	0	0	0	0	0
PANTO-PWY: phosphopantothenate biosynthesis I|g__Actinomyces.s__Actinomyces_viscosus	0.831384	1.61472	0.678533	0	0	0	0	0	0	0	0	6.31148	0	0.663815	0.645329	0.0805726	0	0	0	0	0	0	0.573434	1.38633	0	0	5.88619	8.38869	2.77404	0.733539	1.23034	0.919668	0.85881	1.00804	0	0	0	1.24814	0.612094	0	0	0	0	0	0	0	0.668126
PANTO-PWY: phosphopantothenate biosynthesis I|g__Alloprevotella.s__Alloprevotella_rava	0	0	0	0	0	0	0	0	0	0	0	0	0	0	0	0	0	0	0	0	0	0	0	0	0	1.78068	0	0	0	0	0	0	0	0	0	0	0	0	2.17319	0.944093	0	0	0	0	0	0	0
PANTO-PWY: phosphopantothenate biosynthesis I|g__Alloprevotella.s__Alloprevotella_tannerae	0	1.86984	4.32547	0	0	0	15.2645	2.8587	0	0	5.51953	5.45214	5.72106	1.45979	1.22758	0.560975	0.771091	0.816769	3.95432	0	0	8.35453	0	0.21284	0	63.1885	0	0	0	0.88542	0	0	1.12837	1.26311	6.1716	2.56513	0	0	0	0	2.45303	3.78089	0	3.80793	2.95232	0	0
PANTO-PWY: phosphopantothenate biosynthesis I|g__Bacteroidetes_noname.s__Bacteroidetes_oral_taxon_274	0	0	0	0	0	0	0	0	0	0	0	0	0	0	0	0	0	0	1.1708	0	0	0	0.868007	0.327666	0	0	0	0	0.780953	0.488148	3.55121	0	0	0	0	0	0	0	0	0	0	0	0	0	0	0	0
PANTO-PWY: phosphopantothenate biosynthesis I|g__Campylobacter.s__Campylobacter_concisus	0	3.51782	3.46135	0	1.82894	0	0	0	0	0	0	4.77697	5.40115	10.3821	3.2223	1.06287	1.01777	5.31724	0	11.337	5.49192	0	3.68367	3.14472	3.25631	2.62698	5.63758	0	3.24733	1.93276	2.89317	13.8553	13.6642	1.41057	1.19881	0	1.29423	3.73885	9.88028	10.4763	2.808	0	11.2594	1.46469	1.43098	0	0
PANTO-PWY: phosphopantothenate biosynthesis I|g__Campylobacter.s__Campylobacter_gracilis	0	0	0	0	0	0	0	0	0	0	0	0	0	0	0	0	0	0	0	0	0	0	0	0.0792421	0	0	0	0	0	0	0	0	0	0	0	0	0	0	0.299703	0	0	0	0	0	0	0	0
PANTO-PWY: phosphopantothenate biosynthesis I|g__Campylobacter.s__Campylobacter_showae	0	5.90071	0	0	0	0	0	0	0	0	0	0	0	0	0	0	0	0	0	2.63447	0	0	0	0.249151	0	0	0	0	0	0	0	0	0	0	0	0	0	0	0.395033	0	0	0	0	0	0	0	0
PANTO-PWY: phosphopantothenate biosynthesis I|g__Capnocytophaga.s__Capnocytophaga_gingivalis	0	3.46109	2.41604	0	0	0	0	0	0	0	0	0	0	0	0	0	0	0	0	2.06112	0	0	0	0.681401	0	0	0	0	1.15695	0	0.673614	0	0.851554	0.828067	0	0	0	2.18896	0.793544	0	0	0	0	0	0	0	0
PANTO-PWY: phosphopantothenate biosynthesis I|g__Capnocytophaga.s__Capnocytophaga_granulosa	0	0	0	0	0	0	0	0	0	0	0	0	0	0.720563	0	0	0	0	0	0	0	0	0	0	0	0	0	0	0	0	0.673615	0	0	0	0	0	0	0	0	0	0	0	0	0	0	0	0
PANTO-PWY: phosphopantothenate biosynthesis I|g__Capnocytophaga.s__Capnocytophaga_ochracea	0	0	0	0	0	0	0	0	0	0	0	0	0	0	0	0	1.21988	0	0	0	0.724065	0	0	1.39121	0	0	0	0	0	0.518952	0	2.28681	0	0	0	0	0	0	0.600072	0	0.366953	0	0	0	0	0.889578	0
PANTO-PWY: phosphopantothenate biosynthesis I|g__Corynebacterium.s__Corynebacterium_durum	0	0	0	0	0	0	0	0	0	0	0	0	0	0	0	0	0	0	0	0	0	0	0	0.0903538	0	0	2.24052	1.54802	0	0	0	0	0.759335	0.628216	0	0	0.177229	0	0	0	0	0	0	0	0	0	0
PANTO-PWY: phosphopantothenate biosynthesis I|g__Eikenella.s__Eikenella_corrodens	0	0	0	0	0	0	0	0	0	0	0	0	0	0	0	0	0	0	0	0	0	0	0	0.028403	0	0	0	0	0	0	0	0	0	0	0	0	0.242955	0	0	0	0	0	0	0	0	0	0
PANTO-PWY: phosphopantothenate biosynthesis I|g__Enhydrobacter.s__Enhydrobacter_aerosaccus	0	0	0	0	0	0	0	0	0	0	0	0	0	0	0	0	0	0	0	0	0	0	0	0.224776	0	0	0	0	0	0	0	0	0	0	0	0	0	0	0	0	0	0	0	0	0	0	0
PANTO-PWY: phosphopantothenate biosynthesis I|g__Escherichia.s__Escherichia_coli	1.32883	0	0	0	0	0	0	0	0	0	0	0	0	0	0	0.660654	0	0	0	0	0	0	0	0.581267	0	0	0	0	0	0	0	0	0	0	0	0	0	0	0	0	0	0	0	0	0	0	40.9211
PANTO-PWY: phosphopantothenate biosynthesis I|g__Fusobacterium.s__Fusobacterium_necrophorum	0	0	0	0	0	0	0	0	0	0	0	0	0	0	0	0	0	0	0	0	0	0	0	0	0	0	0	0	0	0	0	6.3809	0	0	0	0	0	0	0	0	0	0	0	0	0	0	0
PANTO-PWY: phosphopantothenate biosynthesis I|g__Kingella.s__Kingella_denitrificans	0	0	0	0	0	0	0	0	0	0	0	0	0	0	0	0	0	0	0	1.60826	0.812672	0	1.08722	0	0	0	0	0	0	0	0	0	0	0.197207	0	0.620897	0.218848	0	0	0	0	0.893274	0	0	0	0	0
PANTO-PWY: phosphopantothenate biosynthesis I|g__Kingella.s__Kingella_oralis	0	0	0	0	0	0	0	0	0	0	0	0	0	0	0	0	0	0	0	0	0	0	0	0	0	0	0	0	0	0	0	0	0	0.715246	0	0	0	0	0.663556	0	0	0	0	0	0	0	0
PANTO-PWY: phosphopantothenate biosynthesis I|g__Moraxella.s__Moraxella_catarrhalis	0	0	0	0	0	0	0	0	0	0	0	0	0	0	0	0.185167	0	0	0	0	0	0	0	0	0	0	0	0	0	0	0	0	0	0	0	0	0	0	0	0	0	0	0	0	0	0	0
PANTO-PWY: phosphopantothenate biosynthesis I|g__Neisseria.s__Neisseria_cinerea	0	0	0	0	0	0	0	0	0	0	0	0	0	0	0	0	0	0	0	0	0	0	0	0	0	0	0	0	0	0	0	0	0	0	0	0	0.206645	0	0	0	0	0	0	0	0	0	0
PANTO-PWY: phosphopantothenate biosynthesis I|g__Neisseria.s__Neisseria_flavescens	0	4.39376	0	1.0357	0	0	3.0818	1.52385	2.08042	0	0	0	0	12.2969	0.68903	0	1.06299	5.15666	3.57333	3.47996	0	1.25924	1.91216	1.4553	0	9.58197	5.81685	17.6163	1.25513	7.28823	10.4974	0	6.26015	11.709	0	0	6.73401	41.6355	0.92984	6.25211	6.62815	4.32352	0	1.48859	0	0	1.6904
PANTO-PWY: phosphopantothenate biosynthesis I|g__Neisseria.s__Neisseria_sicca	0	0	0	0	0	3.34753	0	0	0	0	0.864596	10.7912	1.81722	0	1.07224	0	1.10252	3.50688	3.12308	1.26934	1.83491	1.88922	0.906558	2.4817	0	0	10.9624	23.8261	0	0	0	0	0	6.7638	0	0	2.65681	6.662	0.749403	5.37444	0	1.39949	1.69781	2.42021	2.45872	0	0
PANTO-PWY: phosphopantothenate biosynthesis I|g__Neisseria.s__Neisseria_subflava	0	6.27307	1.14811	0	0	0	0	0	0	0	1.57025	5.93817	0	7.56275	0	0	0	1.42149	0	1.98875	0	0	0	3.87421	0	0	0	14.8003	2.65434	3.57098	7.73038	0	2.63632	16.457	1.19991	0	0	37.1547	1.28619	9.04119	26.1471	0	0	1.3338	0	0	0
PANTO-PWY: phosphopantothenate biosynthesis I|g__Peptostreptococcus.s__Peptostreptococcus_stomatis	1.84672	1.80375	6.15873	2.41251	0	0	2.55967	0	3.19088	0	3.35832	0	0	0	0	1.3988	10.6262	0	0	0.847755	0.610304	1.41776	9.63379	2.29761	1.33718	5.32512	0	0	0.857026	0.74141	0	0	0.855977	1.48248	5.26413	0	5.38344	1.64203	0	0	0	0	0	2.91134	0	0	0
PANTO-PWY: phosphopantothenate biosynthesis I|g__Porphyromonas.s__Porphyromonas_catoniae	0	0.703914	0	1.15404	0	0	1.20027	1.29663	0	0	0	1.1902	0	0	2.19697	1.47324	2.5342	0	4.27972	4.58489	0	0	0.826097	2.09029	0	1.0083	0	0	0	0	1.4216	0	0	1.08659	1.24273	0.955593	3.82509	0	0	0	2.73376	4.04415	3.4057	2.10015	0.984161	0	0
PANTO-PWY: phosphopantothenate biosynthesis I|g__Porphyromonas.s__Porphyromonas_endodontalis	0	0	0	0	0	0	0	0	0	0	1.58608	0	0	4.27468	2.2208	0	0	0	2.89967	0	0	0	0	0	0	0	1.03857	0	0	0	0	1.41766	0	0	0	0	0	4.03793	0	0	0.594304	3.32359	0	0	0	0	0
PANTO-PWY: phosphopantothenate biosynthesis I|g__Porphyromonas.s__Porphyromonas_gingivalis	0	0	0	0	0	0	0	0	0	0	0	0	0	0	0.256755	0	0	0	0	0	0	0	0	0	0	0	0	0	0	0	0	0	0	0	0	0	0	0	0	0	0	0	0	0	0	0	0
PANTO-PWY: phosphopantothenate biosynthesis I|g__Porphyromonas.s__Porphyromonas_sp_oral_taxon_279	0	60.632	23.1482	8.76163	11.5798	0	35.9702	41.9062	28.3999	26.2324	60.4925	26.9317	0	19.6138	2.62044	2.03715	136.918	42.0872	20.8524	23.5545	8.45358	9.5796	7.9323	1.97244	6.51397	23.6939	0	67.6445	52.2224	15.2387	44.9661	0	2.13427	41.8023	61.209	5.11557	81.7943	16.6501	2.2024	13.9076	143.839	43.2493	3.53352	21.562	10.7412	6.61396	5.81093
PANTO-PWY: phosphopantothenate biosynthesis I|g__Prevotella.s__Prevotella_nigrescens	0	0	0	0	0	0	15.0991	0	0	0	0	0	0	0	10.0925	0	0	0	0	0	0	0	0	3.30406	0	0	0	0	0	0	0	0	0	0	0	0	0	0	0	0	0	0	0	0	0	0	0
PANTO-PWY: phosphopantothenate biosynthesis I|g__Rothia.s__Rothia_aeria	0	0	0	0	0	5.17662	0	0	0	0	0	3.38406	0	0.852311	0	1.5606	0	1.08845	4.64246	2.29049	4.2535	0	4.2753	0.874877	0	1.18028	37.804	8.336	2.29706	0.493717	3.5057	0	0	6.36353	0	1.5566	5.27623	1.53336	1.22867	4.50294	1.55689	0	1.73888	0	0.978465	0.987488	0
PANTO-PWY: phosphopantothenate biosynthesis I|g__Rothia.s__Rothia_dentocariosa	0	0	0	0	0	2.92567	0	0	2.88806	0	1.97959	1.24989	0	0.68625	0.305285	1.68379	3.26309	0	2.57918	0	1.40503	0	4.04702	0.0973716	0	0	14.907	0	0	2.14761	0	7.34152	5.80846	13.775	0	0	3.18953	0	9.77066	1.74667	1.39961	1.12599	3.26909	1.09261	0	0	0
PANTO-PWY: phosphopantothenate biosynthesis I|g__Rothia.s__Rothia_mucilaginosa	0	13.658	2.23744	0	1.32494	14.2672	4.15926	1.13	1.86095	0	6.50538	12.7465	0	45.2783	0.467335	0.349017	1.03667	2.71501	15.5263	6.30799	39.7652	0	89.6804	2.81867	1.13763	1.08312	28.9311	21.5884	86.889	36.6399	39.8727	9.14487	16.3864	62.4707	0	0.846529	15.9001	1.84601	19.2365	10.9625	27.7742	4.35087	0	3.9743	0	1.19122	0
PANTO-PWY: phosphopantothenate biosynthesis I|unclassified	8.92069	69.1192	58.4373	35.3994	23.1082	0	46.6017	60.0735	16.1393	22.1383	29.7604	50.9778	21.6164	40.4742	22.9633	43.0807	61.5915	26.5511	22.199	59.7052	62.3677	21.0078	34.6122	27.5854	32.8842	16.6899	11.9885	10.6055	32.7463	41.0456	22.3089	38.8013	26.4564	18.1127	59.0143	83.124	72.4213	13.3044	30.4063	31.3791	44.2511	28.0538	17.2235	29.6783	19.1589	53.1055	6.59334
PANTOSYN-PWY: pantothenate and coenzyme A biosynthesis I	469.041	503.76	371.989	456.42	484.703	323.707	334.415	549.119	515.387	508.352	351.853	367.434	336.228	357.51	348.318	388.631	542.614	280.41	303.119	316.976	398.718	398.193	346.91	462.067	547.892	517.726	276.728	324.517	411.684	413.308	284.63	354.363	370.367	324.779	423.08	512.779	309.627	282.95	352.487	303.04	423.516	350.725	254.776	369.408	316.602	434.049	412.42
PANTOSYN-PWY: pantothenate and coenzyme A biosynthesis I|g__Acidovorax.s__Acidovorax_ebreus	0	0	0	0	0	0	0	0	0	0	0	0	0	0	0	0	0	0	0	0	0	0	0	0.780781	0	0	0	0	0	0	0	0	0	0	0	0	0	0	0	0	0	0	0	0	0	0	0
PANTOSYN-PWY: pantothenate and coenzyme A biosynthesis I|g__Actinomyces.s__Actinomyces_massiliensis	0	0	0	0	0	0	0	0	0	0	0	0	0	0	0	0	0	0	0	0	0	0	0	0.047746	0	0	0	0	0	0	0	0	0	0	0	0	0	0	0	0	0	0	0	0	0	0	0
PANTOSYN-PWY: pantothenate and coenzyme A biosynthesis I|g__Actinomyces.s__Actinomyces_naeslundii	0	0	0	1.11297	0	0	0	0	0	0	0	0	0	0	0	0	0	0	0	0	0	0	0	0.773222	0	0	0	0	0	0	0	0	0	0	0	0	0.134674	0	0	0	0.561975	0	0	0	0	0	0
PANTOSYN-PWY: pantothenate and coenzyme A biosynthesis I|g__Actinomyces.s__Actinomyces_odontolyticus	0	0	0	0	0	0	1.95767	1.83359	0	0	0	0	1.97679	0	0	0.967804	0	2.85367	0	0	1.86771	0	0	0.601189	5.00339	0	0	0	2.17735	6.14383	2.28881	0	0	1.2207	2.30471	0	1.35002	4.77653	0.823143	1.82941	1.06993	0	0	1.27483	0	2.25232	3.77674
PANTOSYN-PWY: pantothenate and coenzyme A biosynthesis I|g__Actinomyces.s__Actinomyces_sp_ICM39	0	4.07289	0	0	0	0	0	0	0	0	0	0	0	0	0	0	0	0	0	0	0	0	0	1.93355	0	0	0	0	0	0	0	0	0	0	0	0	0	0	0	0	0	0	0	0	0	0	0
PANTOSYN-PWY: pantothenate and coenzyme A biosynthesis I|g__Actinomyces.s__Actinomyces_sp_ICM47	0	0	0	0	0	0	0	0	0	0	0	0	0	0	5.40509	0	0	0	0	0	0	0	0	12.1763	0	0	0	0	0	0	0	0	0	0	0	0	0	0	2.51937	0	0	0	0	0	0	0	0
PANTOSYN-PWY: pantothenate and coenzyme A biosynthesis I|g__Actinomyces.s__Actinomyces_sp_oral_taxon_448	0	0	0	0	0	0	0	0	0	0	0	0	0	0	1.88959	0	0	0	0	0	0	0	0	0.158573	0	0	0	0	0	0	0	0	0	0	0	0	0	0	0	0	0	0	0	0	0	0	0
PANTOSYN-PWY: pantothenate and coenzyme A biosynthesis I|g__Alloprevotella.s__Alloprevotella_tannerae	0	1.58109	5.29417	0	0	0	12.1741	2.83618	0	0	6.68932	3.74869	0	0	1.44089	0	0	0	4.01874	0	0	6.20182	0	0	0	45.9479	0	0	0	0	0	0	1.40932	1.36891	6.40401	3.13499	0	0	0	0	2.32956	3.81172	0	0	0	0	0
PANTOSYN-PWY: pantothenate and coenzyme A biosynthesis I|g__Escherichia.s__Escherichia_coli	0	0	0	0	0	0	0	0	0	0	0	0	0	0	0	0	0	0	0	0	0	0	0	0.25686	0	0	0	0	0	0	0	0	0	0	0	0	0	0	0	0	0	0	0	0	0	0	27.4226
PANTOSYN-PWY: pantothenate and coenzyme A biosynthesis I|g__Peptostreptococcus.s__Peptostreptococcus_stomatis	0	0	0	0	0	0	0	0	0	0	0	0	0	0	0	0	3.15572	0	0	0	0	0	3.70239	0	0	0	0	0	0	0	0	0	0	0	0	0	0	0	0	0	0	0	0	3.30466	0	0	0
PANTOSYN-PWY: pantothenate and coenzyme A biosynthesis I|g__Porphyromonas.s__Porphyromonas_catoniae	0	0	0	0	0	0	0	1.03617	0	0	0	0	0	0	1.11437	0.629309	0.946275	0	3.97023	3.05707	0	0	0.786058	2.01405	0	0	0	0	0	0	1.31025	0	0	0.711541	0	0	2.07902	0	0	0	2.12424	3.58962	0	0	1.24488	0	0
PANTOSYN-PWY: pantothenate and coenzyme A biosynthesis I|g__Porphyromonas.s__Porphyromonas_sp_oral_taxon_279	0	51.7865	22.5371	10.0664	9.29269	0	40.1542	43.5178	28.9491	27.4823	64.8319	22.6013	0	18.5795	2.50636	1.05488	131.068	40.28	21.6994	20.7089	6.07023	11.3978	6.58652	2.30691	7.11405	25.8672	0	67.7982	48.1179	13.0864	44.6569	0	0	41.941	58.6015	3.72891	77.1883	19.0804	0.887188	14.9202	123.402	44.4584	3.41464	23.3093	10.0393	7.80203	0
PANTOSYN-PWY: pantothenate and coenzyme A biosynthesis I|unclassified	16.2553	68.1367	68.5635	44.4227	32.3817	0	56.6758	49.8261	23.7622	30.341	42.6644	47.5678	19.8377	36.9366	24.6729	56.0909	68.8002	16.4806	30.7416	70.2875	73.6477	27.1462	23.9771	41.0779	34.1759	31.0527	15.3403	12.2229	17.9311	47.2855	18.6911	32.9233	32.7635	17.558	70.7292	72.8324	83.2456	16.6202	24.1072	37.8459	47.005	35.065	23.2091	47.8671	23.5822	68.3296	8.337
PENTOSE-P-PWY: pentose phosphate pathway	80.4901	189.74	202.537	103.448	96.229	165.22	154.792	153.733	117.633	118.733	152.473	229.514	68.2536	215.757	129.615	139.925	199.395	151.775	176.688	163.975	176.459	99.1589	184.239	138.318	106.575	120.549	130.494	240.812	240.284	227.596	282.745	167.357	187.895	317.874	148.648	148.107	239.304	196.249	192.152	238.684	266.669	192.912	136.986	131.092	124.932	146.871	118.144
PENTOSE-P-PWY: pentose phosphate pathway|g__Propionibacterium.s__Propionibacterium_propionicum	0	0	0	0	0	0	0	0	0	0	0	0.876565	0	0	0	0	0	0	0	0	0	0	1.6771	0.645029	0	0	0	0	0	0	0	0	0	0	0	0	0.712368	0	0	0	0.982943	0	0	0	0	0	0
PENTOSE-P-PWY: pentose phosphate pathway|g__Rothia.s__Rothia_dentocariosa	0	0	0	0	0	5.09884	0.91894	0	0	0	0	0	0	0	0	0	0	1.30667	1.16665	0	0	0	4.00318	0	0	0	9.63898	0	0	1.3909	0	3.66848	3.59676	7.4887	0	1.3819	3.27093	0	6.04158	0	0.954952	0	0	0	0	0	0
PENTOSE-P-PWY: pentose phosphate pathway|unclassified	0	16.7196	21.9177	0	11.4791	0	0	0	0	0	0	13.6072	0	13.0519	6.63807	14.9646	9.74171	0	0	0	4.16458	9.44407	14.5339	16.5286	12.1714	26.6494	0	0	0	5.2128	7.19793	0	11.0845	20.1878	15.4795	0	26.7474	0	13.871	13.456	21.3415	11.9105	0	12.7536	0	0	5.411
PEPTIDOGLYCANSYN-PWY: peptidoglycan biosynthesis I (meso-diaminopimelate containing)	905.368	804.556	658.628	691.321	923.783	634.913	562.742	777.876	816.643	922.683	595.824	763.525	596.12	688.059	714.358	686.07	771.276	479.132	558.913	525.845	782.574	701.185	733.109	807.238	837.856	723.113	567.56	678.633	771.487	795.593	630.181	682.691	688.97	739.291	613.227	892.301	577.719	608.747	673.812	700.193	741.835	667.484	470.78	642.488	613.412	724.108	668.554
PEPTIDOGLYCANSYN-PWY: peptidoglycan biosynthesis I (meso-diaminopimelate containing)|g__Abiotrophia.s__Abiotrophia_defectiva	1.54652	0	1.1718	0	0	2.19834	0	1.32077	0	0	2.19154	2.88549	0	0	3.92085	0.983412	3.62658	6.32955	3.59643	1.47971	2.98785	0.924321	1.83953	2.84244	0	0	5.86888	5.98907	0	0	1.52293	0	0	1.26368	0	0	6.40317	0	0	0.585876	0.78928	6.13612	0	1.47895	2.9488	0	0
PEPTIDOGLYCANSYN-PWY: peptidoglycan biosynthesis I (meso-diaminopimelate containing)|g__Acidovorax.s__Acidovorax_ebreus	0	0	0	0	0	0	0	0	0	0	0	0	0	0	0	0	0	0	0	0	0	0	0	0.649066	0	0	0	0	0	0	0	0	0	0	0	0	0	0	0	0	0	0	0	0	0	0	0
PEPTIDOGLYCANSYN-PWY: peptidoglycan biosynthesis I (meso-diaminopimelate containing)|g__Actinobaculum.s__Actinobaculum_sp_oral_taxon_183	0	0	0	0	0	0	0	0	0	0	0	0	0	0	0	0	0	0	0	0	0	0	0	0.241777	0	0	0	0	0	0	0	0	0	0	0	0	0	0	0	0	0	0	0	0	0	0	0
PEPTIDOGLYCANSYN-PWY: peptidoglycan biosynthesis I (meso-diaminopimelate containing)|g__Actinomyces.s__Actinomyces_georgiae	0	0	0	0	0	0	0	0	0	0	0	0	0	0	0	0	1.24021	0	0	0	0	0	0	1.48847	0	0	0	0	0	0	0	0	0	0.859696	0	0	0	0	0	0	0	0	0	0	0	0	0
PEPTIDOGLYCANSYN-PWY: peptidoglycan biosynthesis I (meso-diaminopimelate containing)|g__Actinomyces.s__Actinomyces_graevenitzii	2.18006	0	8.9307	0	0	0	0	0	0	0	0	0	0	0	0	0	1.19046	0.87331	0	0	0	0	0	1.77326	1.9172	1.59317	0	0	0	0.577247	0	1.54788	0	0	0	0	0.723421	2.56678	2.55357	0.562533	0	0	0	1.1925	0	0	1.06438
PEPTIDOGLYCANSYN-PWY: peptidoglycan biosynthesis I (meso-diaminopimelate containing)|g__Actinomyces.s__Actinomyces_johnsonii	0	0	0	0	0	0	0	0	0	0	0	0	0	0	0	0	0	0	0	0	0	0	0	0	0	0	0	0	0	0	0	0	0	0.507386	0	0	0	0	0	0	0	0	0	0	0	0	0
PEPTIDOGLYCANSYN-PWY: peptidoglycan biosynthesis I (meso-diaminopimelate containing)|g__Actinomyces.s__Actinomyces_massiliensis	0	0	0	0	0	0	0	0	0	0	0	0	0	0	0	0	0	0	0	0	0	0	0	0.272934	0	0	0	0	2.05905	0.480792	0	0	0	0	0	0	0	0	0	0	0	0	0	0	0	0	0
PEPTIDOGLYCANSYN-PWY: peptidoglycan biosynthesis I (meso-diaminopimelate containing)|g__Actinomyces.s__Actinomyces_sp_HPA0247	0	0	0	0	0	0	0	0	0	0	0	0	0	0	1.09215	22.9537	0	0	0	0	0	0	0	1.69579	0	0	0	0	0	0	0	0	0	0	0	0	0	0	4.71328	9.75903	0	0	0	0	0	0	0
PEPTIDOGLYCANSYN-PWY: peptidoglycan biosynthesis I (meso-diaminopimelate containing)|g__Actinomyces.s__Actinomyces_sp_ICM39	0	7.43143	0	0	0	0	0	0	0	0	0	0	0	0	0	0	0	0	0	0	0	0	0	3.39604	0	0	0	0	0	0	0	0	0	0	0	0	0	0	0	0	0	0	0	0	0	0	0
PEPTIDOGLYCANSYN-PWY: peptidoglycan biosynthesis I (meso-diaminopimelate containing)|g__Actinomyces.s__Actinomyces_sp_ICM47	0	0	0	0	0	0	0	0	0	0	0	0	0	0	4.56672	0	0	0	0	0	0	0	0	11.9734	0	0	0	0	0	0	0	0	0	0	0	0	0	0	2.56226	0	0	0	0	0	0	0	0
PEPTIDOGLYCANSYN-PWY: peptidoglycan biosynthesis I (meso-diaminopimelate containing)|g__Actinomyces.s__Actinomyces_sp_oral_taxon_172	0	0	0	0	0	0	0	0	0	0	0	0	0	0	0	0	0	0	0	0	0	0	0	5.32554	0	0	0	0	0	0	0	0	0	0	0	0	0	0	0	0	0	0	0	0	0	0	0
PEPTIDOGLYCANSYN-PWY: peptidoglycan biosynthesis I (meso-diaminopimelate containing)|g__Actinomyces.s__Actinomyces_sp_oral_taxon_448	0	0	0	0	0	0	0	0	0	0	0	0	0	0	3.2378	0	0	0	0	0	0	0	0	0.206966	0	0	0	0	0	0	0	0	0	0	0	0	0	0	0	0	0	0	0	0	0	0	0
PEPTIDOGLYCANSYN-PWY: peptidoglycan biosynthesis I (meso-diaminopimelate containing)|g__Alloprevotella.s__Alloprevotella_tannerae	0	2.0153	5.88239	0	0	0	12.951	2.71677	0	0	5.38073	3.70756	2.41131	2.54957	0.839512	0.649854	0	1.80121	2.34552	0	0	9.54412	0	0.0871688	0	61.1414	0	0	0	0	0	0	0	0.444165	7.11311	2.47208	0	0	0	0	1.81421	5.99742	0	3.76933	3.32775	0	0
PEPTIDOGLYCANSYN-PWY: peptidoglycan biosynthesis I (meso-diaminopimelate containing)|g__Atopobium.s__Atopobium_parvulum	5.87755	9.58872	4.45548	4.05812	3.36267	0	9.16389	7.28273	3.71519	4.35644	3.35984	8.57914	4.02782	0	5.22819	8.93908	6.1156	4.95825	0	0	7.59238	4.0582	2.09835	13.5876	8.82186	2.7498	4.00601	2.90667	0	4.37481	0	2.89467	3.60525	1.18037	3.28635	20.4745	0	1.409	3.29461	2.36006	0	0	0	9.5917	14.3808	7.50889	8.15277
PEPTIDOGLYCANSYN-PWY: peptidoglycan biosynthesis I (meso-diaminopimelate containing)|g__Atopobium.s__Atopobium_rimae	1.01824	6.7298	1.46399	0.905039	0	0	3.69567	0	1.12863	0	0	12.6095	6.7566	0	3.89146	0.326287	0.683473	2.52897	0	0	0	0.899867	0.684011	5.1189	0	0	0	0	0	4.20544	0	0	0	0.772356	0	5.93774	0	0	0	0	0	0	0	6.81693	7.87073	2.44021	0
PEPTIDOGLYCANSYN-PWY: peptidoglycan biosynthesis I (meso-diaminopimelate containing)|g__Atopobium.s__Atopobium_sp_ICM58	0	0	0	0	0	0	0	0	0	0	0	0	0	0	0	0	0	0	0	0	0	0	4.57785	0	0	0	0	0	0	0	0	0	0	0	0	0	0	0	0	0	0	0	0	0	0	0	0
PEPTIDOGLYCANSYN-PWY: peptidoglycan biosynthesis I (meso-diaminopimelate containing)|g__Bacteroidetes_noname.s__Bacteroidetes_oral_taxon_274	0	0	0	0	0	0	0	0	0	0	0	0	0	0	0	0	0	0	0	0	0	0	0.687778	0.0417935	0	0	0	0	0	0	3.40744	0	0	0	0	0	0	0	0	0	0	0	0	0	0	0.87346	0
PEPTIDOGLYCANSYN-PWY: peptidoglycan biosynthesis I (meso-diaminopimelate containing)|g__Campylobacter.s__Campylobacter_gracilis	0	0	0	0	0	0	0	0	0	0	0	0	0	0	0.199955	0	0	0	0	0	0	0	0	0.144646	0	0	0	0	0	0	0	0	0	0	0	0	0	0	0	0	0	0	0	0	0	0	0
PEPTIDOGLYCANSYN-PWY: peptidoglycan biosynthesis I (meso-diaminopimelate containing)|g__Campylobacter.s__Campylobacter_rectus	0	0	0	0	0	0	0	0	0	0	0	0	0	0	0	0	0	0	0	0	0	0	0.669303	0	0	0	0	0	0	0	0	0	0	0	0	0	0	0	0	0	0	0	0	0	0	0	0
PEPTIDOGLYCANSYN-PWY: peptidoglycan biosynthesis I (meso-diaminopimelate containing)|g__Campylobacter.s__Campylobacter_showae	0	4.01449	0	0	0	0	0	0	0	0	0	1.0969	0	0	0	0	0	0	0	2.16202	0	0	0	0.309321	0	0	0	0	0	0	0	0	0	0	0	0	0.314698	0	0.630042	0	0	0	0	0	0	0	0
PEPTIDOGLYCANSYN-PWY: peptidoglycan biosynthesis I (meso-diaminopimelate containing)|g__Capnocytophaga.s__Capnocytophaga_gingivalis	0	1.99097	0.859081	0	0	0	0	0	0	0	0	0	0	0	0	0	0	0	0	1.41894	0.89212	0	0	0.783614	0	0	0	0	0	0	0	0	0	0.627329	0	0	0.230085	0	1.54769	0	0	0	0	0	0	0	0
PEPTIDOGLYCANSYN-PWY: peptidoglycan biosynthesis I (meso-diaminopimelate containing)|g__Capnocytophaga.s__Capnocytophaga_granulosa	0	0	0	0	0	0	0	0	0	0	0	0	0	0	0	0	0	0.881885	0	0	0	0	0	0	0	0	0	0	0	0	0	0	0	0	0	0	0	0	0.244385	0	0	0	0	0	0	0	0
PEPTIDOGLYCANSYN-PWY: peptidoglycan biosynthesis I (meso-diaminopimelate containing)|g__Capnocytophaga.s__Capnocytophaga_ochracea	0	0	0	0	0	0	0	0	0	0	0	0	0	0	0	0	0	0	0	0	0.770014	0	1.22924	1.07585	0	0	0	0	0	0.360674	0	0	0	0	0	0	0	0	0	0	0	0	0	0	0	0	0
PEPTIDOGLYCANSYN-PWY: peptidoglycan biosynthesis I (meso-diaminopimelate containing)|g__Cardiobacterium.s__Cardiobacterium_hominis	0	0	0	0	0	0	0	0	0	0	0	0	0	0	0	0	0	0	0	0	0	0	0	0.304556	0	0	0	0	0	0	0.506968	0	0	0	0	0	0.212963	0	0	0	0	0	0	0	0	0	0
PEPTIDOGLYCANSYN-PWY: peptidoglycan biosynthesis I (meso-diaminopimelate containing)|g__Clostridiales_Family_XIII_Incertae_Sedis_noname.s__Eubacterium_infirmum	0	1.65623	0	0	0	0	0	0	0	0	0	0	0	0	1.19263	0	1.46356	0	0	0	0	0	0	0	0	1.85715	0	0	0	0	0	0	0	0	0	3.35222	0	0	0	0	0	3.19705	0	0	1.96717	3.12141	0
PEPTIDOGLYCANSYN-PWY: peptidoglycan biosynthesis I (meso-diaminopimelate containing)|g__Corynebacterium.s__Corynebacterium_durum	0	0	0	0	0	0	0	0	0	0	0	0	0	0	0	0	0	0	0	0	0	0	0	0.211979	0	0	0	0	0	0	0	0	0	0	0	0	0	0	0	0	0	0	0	0	0	0	0
PEPTIDOGLYCANSYN-PWY: peptidoglycan biosynthesis I (meso-diaminopimelate containing)|g__Corynebacterium.s__Corynebacterium_matruchotii	0	0	0	0	0	0	0	0	0	0	0	0	0	0	0	0	0	0	0	0	0	0	0	0.0900749	0	0	0	0	1.27229	0	1.00632	0	0	0	0	0	0	0	0	0	0	2.92851	0	0	0	0	0
PEPTIDOGLYCANSYN-PWY: peptidoglycan biosynthesis I (meso-diaminopimelate containing)|g__Cryptobacterium.s__Cryptobacterium_curtum	0	0	0	0	0	0	0	0	0	0	0	2.3559	0	0	0	0	0	0	0	0	0	0	0	0	0	0	0	0	0	0	0	0	0	0	0	1.06059	0	0	0	0	0	0	0	0	0	0	0
PEPTIDOGLYCANSYN-PWY: peptidoglycan biosynthesis I (meso-diaminopimelate containing)|g__Eikenella.s__Eikenella_corrodens	0	0	0	0	0	0	0	0	0	0	0	0	0	0	0	0	0	0	0	0	0	0	0	0.172292	0	0	0	0	0	0	0	0	0	0	0	0	0	0	0	0	0	0	0	0	0	0	0
PEPTIDOGLYCANSYN-PWY: peptidoglycan biosynthesis I (meso-diaminopimelate containing)|g__Enhydrobacter.s__Enhydrobacter_aerosaccus	0	0	0	0	0	0	0	0	0	0	0	0	0	0	0	0	0	0	0	0	0	0	0	0.0936578	0	0	0	0	0	0	0	0	0	0	0	0	0	0	0	0	0	0	0	0	0	0	0
PEPTIDOGLYCANSYN-PWY: peptidoglycan biosynthesis I (meso-diaminopimelate containing)|g__Escherichia.s__Escherichia_coli	0	0	0	0	0	0	0	0	0	0	0	0	0	0	0	0.122897	0	0	0	0	0	0	0	0.231445	0	0	0	0	0	0	0	0	0	0	0	0	0	0	0	0	0	0	0	0	0	0	21.8438
PEPTIDOGLYCANSYN-PWY: peptidoglycan biosynthesis I (meso-diaminopimelate containing)|g__Eubacterium.s__Eubacterium_brachy	0	1.9899	0	0	0	0	0.848676	0	0	1.4068	3.64163	0	0	0	3.45893	0	0	0	0	0	0	0	1.32859	4.20505	1.15291	1.85806	0	0	0.917497	1.42548	1.46933	8.56806	0	0	0	1.08678	0	0	0	0	0.933718	7.97163	0	2.30942	7.42235	1.26329	0
PEPTIDOGLYCANSYN-PWY: peptidoglycan biosynthesis I (meso-diaminopimelate containing)|g__Eubacterium.s__Eubacterium_saphenum	0	0	0	0	0	0	0	0	0	0	0	0	0	0	1.23076	0	0	0	0	0	0	0	0	0	0	0	0	0	0	0	0	0	0	0	0	0	0	0	0	0	0	0	0	0	0	0	0
PEPTIDOGLYCANSYN-PWY: peptidoglycan biosynthesis I (meso-diaminopimelate containing)|g__Filifactor.s__Filifactor_alocis	0	0	0	0	0	0	0	0	0	0	0	0	0	0	0.521406	0	0	0	0	0	0	0	0	0	0	0	0	0	0	0	0	0	0	0	0	0	0	0	0	0	0	0	0	0	0	0	0
PEPTIDOGLYCANSYN-PWY: peptidoglycan biosynthesis I (meso-diaminopimelate containing)|g__Fusobacterium.s__Fusobacterium_necrophorum	0	0	0	0	0	0	0	0	0	0	0	0	0	0	0	0	0	0	0	0	0	0	0	0	0	0	0	0	0	0	0	6.37736	0	0	0	0	0	0	0	0	0	0	0	0	0	0	0
PEPTIDOGLYCANSYN-PWY: peptidoglycan biosynthesis I (meso-diaminopimelate containing)|g__Fusobacterium.s__Fusobacterium_nucleatum	0	3.41813	0	0	0	2.74222	2.09057	1.92987	1.914	0	4.12076	6.37252	0	6.30738	2.2871	2.08973	5.25516	7.4501	8.34618	3.53524	1.57573	0	9.26748	6.79468	0	2.55081	7.64103	1.7137	3.76877	2.93379	9.22186	3.28819	1.39242	3.7188	1.68661	3.06673	2.59466	7.79262	3.43887	2.38212	5.46626	6.39726	2.03124	4.75463	3.30604	1.43836	1.24971
PEPTIDOGLYCANSYN-PWY: peptidoglycan biosynthesis I (meso-diaminopimelate containing)|g__Gemella.s__Gemella_haemolysans	0	0	0	0	0	0	0	1.48905	0	1.56196	0	1.23133	0	1.35592	2.84857	0	1.44745	0	1.857	0	2.08989	0	0	0.180936	0	0	0	0	0	0	0.819206	0	0	2.35172	0	2.74076	1.13068	0	0.273021	0.621599	0.278521	1.95336	0	0	1.9846	0	0
PEPTIDOGLYCANSYN-PWY: peptidoglycan biosynthesis I (meso-diaminopimelate containing)|g__Gemella.s__Gemella_morbillorum	0	0	1.16783	0	0	0	0	0	0	0	5.84073	2.82784	0	0	2.89791	0.595226	5.77543	13.9171	8.87876	1.37158	1.49198	4.99573	0	1.08331	0	1.18635	1.53867	0	0	0	0	0	1.15847	2.43212	3.44819	2.77191	1.8508	0	0	1.20876	0	22.1106	0	0	3.83583	1.42299	0
PEPTIDOGLYCANSYN-PWY: peptidoglycan biosynthesis I (meso-diaminopimelate containing)|g__Granulicatella.s__Granulicatella_adiacens	0	1.28546	1.45763	0	0	3.16729	6.97892	1.90492	1.06868	4.14952	3.62706	3.57984	2.22273	0	5.82174	2.21782	3.43351	4.5755	4.01647	2.40288	1.62382	3.01307	1.03344	1.93688	0	1.37725	8.35821	1.99717	1.25006	0.883867	1.80428	0	0	2.89193	0	3.65483	0.336529	4.47105	0.703129	7.42571	0	3.99446	0	0	4.11807	2.24469	0
PEPTIDOGLYCANSYN-PWY: peptidoglycan biosynthesis I (meso-diaminopimelate containing)|g__Granulicatella.s__Granulicatella_elegans	0	0	0	0	0	0	2.36616	6.06042	2.59423	5.2348	1.22728	3.59268	0	0	4.3509	0	2.94186	4.83996	3.69539	0.989124	5.68626	0	0	0.0708615	0	0	0	1.55754	0	0	0.856169	0	2.20881	0	2.10802	0	6.10544	0	1.1466	1.61189	0	7.15025	0	0	5.26141	0	0
PEPTIDOGLYCANSYN-PWY: peptidoglycan biosynthesis I (meso-diaminopimelate containing)|g__Haemophilus.s__Haemophilus_haemolyticus	0	0	0	0	0	0	1.07765	0	0	0	0	0	0	0	0.513613	0	0	0	0	0	0	0	0	0	0.761024	0	0	1.77691	0	0.36103	0.646716	0	1.6391	0	0	0	0.514474	0	0	0	0.370615	0	0	0	0	0	0
PEPTIDOGLYCANSYN-PWY: peptidoglycan biosynthesis I (meso-diaminopimelate containing)|g__Haemophilus.s__Haemophilus_influenzae	0	0	0	0	0	8.76091	0	0	0	0	0	0	0	1.62657	0	4.90524	0	0	0	0	0.569268	0	0	0	0	0	0	0	0	0	0	0	4.16694	0	0	0	0.355812	0	0	0	0	0	0	0	0	0	0
PEPTIDOGLYCANSYN-PWY: peptidoglycan biosynthesis I (meso-diaminopimelate containing)|g__Haemophilus.s__Haemophilus_parahaemolyticus	0	0	0	0	0	0	0	0	0	0	0	0	0	0	0	0	0	0	0	0	0	0	0	0	0	0	0	0	0	0	0	0	0	0.930303	0	0	0	0	0	0	0	0	0	0	0	0	0
PEPTIDOGLYCANSYN-PWY: peptidoglycan biosynthesis I (meso-diaminopimelate containing)|g__Haemophilus.s__Haemophilus_parainfluenzae	0	15.7731	38.8768	16.1312	6.61437	18.3365	17.4722	11.2515	12.8801	6.813	8.80397	9.71052	5.3027	52.2722	13.2248	4.29516	6.91135	14.2773	19.8559	22.9932	21.1319	7.11229	13.9994	15.9269	15.5327	8.68481	8.99248	53.6585	86.6595	77.4943	67.1531	1.10378	14.5398	92.2267	9.80861	8.34271	36.6699	52.4451	37.9337	16.5128	64.6131	6.68426	1.98732	19.6651	12.4244	2.82489	16.0652
PEPTIDOGLYCANSYN-PWY: peptidoglycan biosynthesis I (meso-diaminopimelate containing)|g__Haemophilus.s__Haemophilus_paraphrohaemolyticus	0	0	0	0	0	0	0	0	0	0	0	0	0	0	0	0	0.894555	0	0	0	1.32916	0	0	0	0	0	0	0	0	0	0	0	1.37544	0	0	0	1.28476	0	0	0	0	0	0	0	0	0	0
PEPTIDOGLYCANSYN-PWY: peptidoglycan biosynthesis I (meso-diaminopimelate containing)|g__Haemophilus.s__Haemophilus_sputorum	0	0	0	0	0	0	0.99067	0	0	0	0	0	0	1.3488	0	0	0	0	0	0	0	0	0	0.171544	0	0	0	0	0	1.01986	2.18438	0	0	0	0	0	1.11748	0	1.63492	0	0	0	0	0	0	0	0.909385
PEPTIDOGLYCANSYN-PWY: peptidoglycan biosynthesis I (meso-diaminopimelate containing)|g__Kingella.s__Kingella_denitrificans	0	0	0	0	0	0	0	0	0	0	0	0	0	0	0	0	0	0	0	1.04279	0	0	0	0	0	0	0	0	0	0	0	0	0	0	0	0.710761	0	0	0	0	0	0	0	0	0	0	0
PEPTIDOGLYCANSYN-PWY: peptidoglycan biosynthesis I (meso-diaminopimelate containing)|g__Kingella.s__Kingella_oralis	0	0	0	0	0	0	0	0	0	0	0	0	0	0	0	0	0	0	0	0	0	0	0	0	0	0	0	0	0	0	0	0	0	0.792809	0	0	0	0	0.801164	0	0	0	0	0	0	0	0
PEPTIDOGLYCANSYN-PWY: peptidoglycan biosynthesis I (meso-diaminopimelate containing)|g__Lachnospiraceae_noname.s__Lachnospiraceae_bacterium_ICM7	0	1.77831	11.49	0	0	0	0	0	0	0	0	1.35676	0	0	0	0	0.920453	0	0	0.715963	0	0	0.567185	0.375874	0	0	0	0	3.77971	1.953	0	0	0	0.869541	0	0	2.57103	0	0.643895	1.34201	2.98147	0	0	1.74082	0	0	0
PEPTIDOGLYCANSYN-PWY: peptidoglycan biosynthesis I (meso-diaminopimelate containing)|g__Lachnospiraceae_noname.s__Lachnospiraceae_bacterium_oral_taxon_082	0	0	0	0	0	0	0	0	0	0	0	0	0	0	0	0	0	0	0	0	1.35059	0	0	1.2209	0	0	0	0	0	1.83165	0	0	0	0	0	0	0	0	0.451474	0	0	0	0	0	0	0	0
PEPTIDOGLYCANSYN-PWY: peptidoglycan biosynthesis I (meso-diaminopimelate containing)|g__Lachnospiraceae_noname.s__Lachnospiraceae_oral_taxon_107	0	0	0	0	0	0	0	0	0	0	0	0	0	0	0	0	0	0	0	0	0	0	0	0	0	0	0	0	0	0	0	0	0	0	0	0	0	0	0	0	0	0.943436	0	0	0	0	0
PEPTIDOGLYCANSYN-PWY: peptidoglycan biosynthesis I (meso-diaminopimelate containing)|g__Leptotrichia.s__Leptotrichia_buccalis	0	0	0	0	0	0	0	0	0	0	0	0	0	0	0	0	0	0	0	0	0	0	0	0.201231	0	0	0	0	0	0	0	0	0	0	0	0	0	0	0	0	0	1.04024	0	0	0	0	0
PEPTIDOGLYCANSYN-PWY: peptidoglycan biosynthesis I (meso-diaminopimelate containing)|g__Leptotrichia.s__Leptotrichia_goodfellowii	0	0	0	0	0	0	0	0	0	0	0	0	0	0	0	0	0	0	0	0	0	0	0.559479	1.03418	0	0	0	0	0	0	0	0	0	0.281666	0	0	0	0	0	0	0	0	0	0	0	0	0
PEPTIDOGLYCANSYN-PWY: peptidoglycan biosynthesis I (meso-diaminopimelate containing)|g__Leptotrichia.s__Leptotrichia_sp_oral_taxon_215	0	0	0	0	0	0	0	0	0	0	0	0	0	0	0	0	0	0	0	0	0	0	0	0.910218	0	0	0	0	0	0	0	0	0	0	0	0	5.99109	0	0	0	0	0	0	0	0	0	0
[truncated: 4,492 more rows]
