# Supplementary material for: Deep metagenomics examines the oral microbiome during dental caries, revealing novel taxa and co-occurrences with host molecules
Source: HighWire-hosted journal article supplement (doi:10.1101/gr.265645.120), 2020-11-25
Supplement: Supplemental_Table_S6.xlsx [file Supplemental_Table_S6.xlsx]

## Sheet: differentials
Supplemental Table S6: Differential Ranks of functional pathways associated with dental caries (i.e. disease status) generated by Songbird	Intercept	Status[T.healthy]
PWY-7269: NAD/NADP-NADH/NADPH mitochondrial interconversion (yeast)	-2.22765	-1.48617
PWY-7323: superpathway of GDP-mannose-derived O-antigen building blocks biosynthesis	-2.78689	-1.30511
GLUCARDEG-PWY: D-glucarate degradation I	-3.42751	-1.29674
COLANSYN-PWY: colanic acid building blocks biosynthesis	-2.41518	-1.21824
PWY-5855: ubiquinol-7 biosynthesis (prokaryotic)	-3.34191	-1.10319
PWY-5856: ubiquinol-9 biosynthesis (prokaryotic)	-3.34191	-1.10319
PWY-5857: ubiquinol-10 biosynthesis (prokaryotic)	-3.34191	-1.10319
PWY-6708: ubiquinol-8 biosynthesis (prokaryotic)	-3.34191	-1.10319
GALACTARDEG-PWY: D-galactarate degradation I	-3.34836	-0.917696
GLUCARGALACTSUPER-PWY: superpathway of D-glucarate and D-galactarate degradation	-3.34836	-0.917696
GALACT-GLUCUROCAT-PWY: superpathway of hexuronide and hexuronate degradation	-0.778244	-0.727554
GALACTUROCAT-PWY: D-galacturonate degradation I	-0.727498	-0.720213
PWY-6507: 4-deoxy-L-threo-hex-4-enopyranuronate degradation	-0.78791	-0.701405
PWY-7242: D-fructuronate degradation	-0.717404	-0.641342
GLUCUROCAT-PWY: superpathway of &beta;-D-glucuronide and D-glucuronate degradation	-0.780183	-0.638049
P162-PWY: L-glutamate degradation V (via hydroxyglutarate)	-3.74887	-0.564089
"PRPP-PWY: superpathway of histidine, purine, and pyrimidine biosynthesis"	-1.62004	-0.556459
PWY-5022: 4-aminobutanoate degradation V	-4.34934	-0.505938
PWY-4702: phytate degradation I	-1.1816	-0.427083
FUCCAT-PWY: fucose degradation	-2.2768	-0.366915
PWY-5840: superpathway of menaquinol-7 biosynthesis	1.23087	-0.344401
PWY-5723: Rubisco shunt	-1.73091	-0.337939
PWY-821: superpathway of sulfur amino acid biosynthesis (Saccharomyces cerevisiae)	-1.55108	-0.318753
GLYCOCAT-PWY: glycogen degradation I (bacterial)	-1.16994	-0.301855
PYRIDNUCSYN-PWY: NAD biosynthesis I (from aspartate)	1.55967	-0.300393
PWY-6891: thiazole biosynthesis II (Bacillus)	-1.69779	-0.298613
SALVADEHYPOX-PWY: adenosine nucleotides degradation II	-1.34365	-0.274773
POLYAMSYN-PWY: superpathway of polyamine biosynthesis I	0.252844	-0.272971
PWY-6823: molybdenum cofactor biosynthesis	-3.44949	-0.262912
PWY-6895: superpathway of thiamin diphosphate biosynthesis II	-0.338238	-0.242534
PWY-6608: guanosine nucleotides degradation III	0.817691	-0.233182
PWY-5690: TCA cycle II (plants and fungi)	-0.922483	-0.225602
PWY-5005: biotin biosynthesis II	0.47883	-0.219731
SER-GLYSYN-PWY: superpathway of L-serine and glycine biosynthesis I	1.75139	-0.217715
RHAMCAT-PWY: L-rhamnose degradation I	-1.66357	-0.214192
PWY-6545: pyrimidine deoxyribonucleotides de novo biosynthesis III	0.375829	-0.213768
COBALSYN-PWY: adenosylcobalamin salvage from cobinamide I	0.804151	-0.21331
PWY-6353: purine nucleotides degradation II (aerobic)	-0.735808	-0.210924
"ARGORNPROST-PWY: arginine, ornithine and proline interconversion"	-2.95381	-0.210554
PWY-7663: gondoate biosynthesis (anaerobic)	2.03949	-0.206431
PWY-6892: thiazole biosynthesis I (E. coli)	-1.3561	-0.206316
PWY-6147: 6-hydroxymethyl-dihydropterin diphosphate biosynthesis I	2.17983	-0.205684
PWY-4981: L-proline biosynthesis II (from arginine)	1.04111	-0.199865
PWY-5973: cis-vaccenate biosynthesis	2.09216	-0.199755
P164-PWY: purine nucleobases degradation I (anaerobic)	0.168946	-0.198083
"PWY-5791: 1,4-dihydroxy-2-naphthoate biosynthesis II (plants)"	1.08921	-0.190268
"PWY-5837: 1,4-dihydroxy-2-naphthoate biosynthesis I"	1.08921	-0.190268
FUC-RHAMCAT-PWY: superpathway of fucose and rhamnose degradation	-2.55419	-0.186036
PWY-7456: mannan degradation	-0.705329	-0.183987
DTDPRHAMSYN-PWY: dTDP-L-rhamnose biosynthesis I	1.79847	-0.182512
ASPASN-PWY: superpathway of L-aspartate and L-asparagine biosynthesis	1.74538	-0.181087
PWY-5863: superpathway of phylloquinol biosynthesis	-1.27859	-0.178149
THISYN-PWY: superpathway of thiamin diphosphate biosynthesis I	-0.0237655	-0.175518
PWY-6282: palmitoleate biosynthesis I (from (5Z)-dodec-5-enoate)	1.60065	-0.173799
PWY-6700: queuosine biosynthesis	2.41942	-0.173057
FASYN-ELONG-PWY: fatty acid elongation -- saturated	1.69222	-0.171758
PWY-7664: oleate biosynthesis IV (anaerobic)	1.65776	-0.171003
PWY0-862: (5Z)-dodec-5-enoate biosynthesis	1.61484	-0.170466
PWY-5686: UMP biosynthesis	2.37865	-0.168583
PWY-5897: superpathway of menaquinol-11 biosynthesis	1.47831	-0.166275
PWY-5898: superpathway of menaquinol-12 biosynthesis	1.47831	-0.166275
PWY-5899: superpathway of menaquinol-13 biosynthesis	1.47831	-0.166275
THISYNARA-PWY: superpathway of thiamin diphosphate biosynthesis III (eukaryotes)	1.53005	-0.155674
PANTOSYN-PWY: pantothenate and coenzyme A biosynthesis I	1.83285	-0.153477
"P125-PWY: superpathway of (R,R)-butanediol biosynthesis"	-4.93496	-0.15333
NONMEVIPP-PWY: methylerythritol phosphate pathway I	2.09568	-0.152911
COA-PWY: coenzyme A biosynthesis I	2.03537	-0.152379
PWY0-1298: superpathway of pyrimidine deoxyribonucleosides degradation	0.461244	-0.151137
PWY66-398: TCA cycle III (animals)	-2.68705	-0.15048
PWY0-1586: peptidoglycan maturation (meso-diaminopimelate containing)	1.09872	-0.149946
PWY-5989: stearate biosynthesis II (bacteria and plants)	0.668188	-0.138855
PWY-1042: glycolysis IV (plant cytosol)	2.25948	-0.138342
PWY-4041: &gamma;-glutamyl cycle	-1.37087	-0.134004
ARGININE-SYN4-PWY: L-ornithine de novo biosynthesis	-3.64499	-0.130669
PEPTIDOGLYCANSYN-PWY: peptidoglycan biosynthesis I (meso-diaminopimelate containing)	2.3936	-0.130508
PWY-6385: peptidoglycan biosynthesis III (mycobacteria)	1.71578	-0.129212
PWY-6386: UDP-N-acetylmuramoyl-pentapeptide biosynthesis II (lysine-containing)	2.42015	-0.128516
PWY-7221: guanosine ribonucleotides de novo biosynthesis	2.45641	-0.128504
PWY-6387: UDP-N-acetylmuramoyl-pentapeptide biosynthesis I (meso-diaminopimelate containing)	2.40959	-0.128048
PWY-4242: pantothenate and coenzyme A biosynthesis III	1.90501	-0.123608
PWY-6549: L-glutamine biosynthesis III	-2.83681	-0.11929
PWY-6897: thiamin salvage II	1.50417	-0.113265
PWY0-1297: superpathway of purine deoxyribonucleosides degradation	0.716439	-0.107778
PWY-6609: adenine and adenosine salvage III	2.00145	-0.105989
COA-PWY-1: coenzyme A biosynthesis II (mammalian)	2.13204	-0.104052
PWY-2942: L-lysine biosynthesis III	2.17237	-0.0999546
PWY66-409: superpathway of purine nucleotide salvage	1.37283	-0.0976544
PWY-5667: CDP-diacylglycerol biosynthesis I	1.74929	-0.0904828
PWY-7219: adenosine ribonucleotides de novo biosynthesis	2.71212	-0.0879293
PWY-7199: pyrimidine deoxyribonucleosides salvage	1.90541	-0.0858018
PANTO-PWY: phosphopantothenate biosynthesis I	1.70478	-0.0857649
PWY-5676: acetyl-CoA fermentation to butanoate II	-0.710827	-0.0829491
PPGPPMET-PWY: ppGpp biosynthesis	-1.29704	-0.0820096
PWY-7357: thiamin formation from pyrithiamine and oxythiamine (yeast)	1.3915	-0.0804506
GLUTORN-PWY: L-ornithine biosynthesis	0.491084	-0.0804023
PWY-6163: chorismate biosynthesis from 3-dehydroquinate	2.09123	-0.0768469
GLYCOL-GLYOXDEG-PWY: superpathway of glycol metabolism and degradation	-3.67804	-0.0733073
PWY-7560: methylerythritol phosphate pathway II	1.56534	-0.0726263
PWY0-1319: CDP-diacylglycerol biosynthesis II	1.78051	-0.0688391
PWY-5097: L-lysine biosynthesis VI	2.00811	-0.0687472
PWY-6270: isoprene biosynthesis I	1.60417	-0.0675948
"GOLPDLCAT-PWY: superpathway of glycerol degradation to 1,3-propanediol"	-0.541083	-0.0675543
PWY-5695: urate biosynthesis/inosine 5'-phosphate degradation	2.21762	-0.0585563
PWY-6151: S-adenosyl-L-methionine cycle I	2.10103	-0.0578745
GLYCOGENSYNTH-PWY: glycogen biosynthesis I (from ADP-D-Glucose)	0.849786	-0.0571018
PWY-6737: starch degradation V	1.70656	-0.0553348
"PWY-7115: C4 photosynthetic carbon assimilation cycle, NAD-ME type"	0.171076	-0.0535613
COMPLETE-ARO-PWY: superpathway of aromatic amino acid biosynthesis	1.93145	-0.0474166
ARO-PWY: chorismate biosynthesis I	1.97912	-0.0448933
METHGLYUT-PWY: superpathway of methylglyoxal degradation	-1.12148	-0.0443473
"PWY-7388: octanoyl-[acyl-carrier protein] biosynthesis (mitochondria, yeast)"	1.44492	-0.043473
"P461-PWY: hexitol fermentation to lactate, formate, ethanol and acetate"	-0.720887	-0.0256725
"PWY-7371: 1,4-dihydroxy-6-naphthoate biosynthesis II"	-1.40981	-0.0229737
PWY-6471: peptidoglycan biosynthesis IV (Enterococcus faecium)	0.778088	-0.0223263
PWY-5100: pyruvate fermentation to acetate and lactate II	1.71225	-0.0222143
PWY-5121: superpathway of geranylgeranyl diphosphate biosynthesis II (via MEP)	0.161561	-0.0213
PWY-6969: TCA cycle V (2-oxoglutarate:ferredoxin oxidoreductase)	-0.742561	-0.0171018
ARGSYN-PWY: L-arginine biosynthesis I (via L-ornithine)	1.07469	-0.0160399
PWY-7400: L-arginine biosynthesis IV (archaebacteria)	1.0821	-0.0151593
PWY-6527: stachyose degradation	0.876428	-0.0141665
PWY0-1296: purine ribonucleosides degradation	1.7132	-0.0126384
PWY-7229: superpathway of adenosine nucleotides de novo biosynthesis I	2.18681	-0.00855171
ARG+POLYAMINE-SYN: superpathway of arginine and polyamine biosynthesis	0.214029	-0.00701394
PWY-5838: superpathway of menaquinol-8 biosynthesis I	-0.499136	-0.00445708
PWY-6606: guanosine nucleotides degradation II	-0.927151	-0.00445537
TRNA-CHARGING-PWY: tRNA charging	1.62399	-0.00328825
PWY-5861: superpathway of demethylmenaquinol-8 biosynthesis	-0.826897	-0.00254766
PWY-6612: superpathway of tetrahydrofolate biosynthesis	-0.911423	-0.00251927
FASYN-INITIAL-PWY: superpathway of fatty acid biosynthesis initiation (E. coli)	1.46319	0.000674148
PWY-6859: all-trans-farnesol biosynthesis	-0.700583	0.00134158
PWY-7031: protein N-glycosylation (bacterial)	-2.67245	0.00145969
HISTSYN-PWY: L-histidine biosynthesis	0.728694	0.00228342
PWY4FS-8: phosphatidylglycerol biosynthesis II (non-plastidic)	0.933769	0.00243794
PWY-621: sucrose degradation III (sucrose invertase)	0.774596	0.00579281
1CMET2-PWY: N10-formyl-tetrahydrofolate biosynthesis	1.18687	0.00597967
PHOSLIPSYN-PWY: superpathway of phospholipid biosynthesis I (bacteria)	1.24389	0.00672209
PWY4FS-7: phosphatidylglycerol biosynthesis I (plastidic)	0.938344	0.00800178
PWY-6124: inosine-5'-phosphate biosynthesis II	1.26381	0.00819945
CALVIN-PWY: Calvin-Benson-Bassham cycle	1.52227	0.0115214
RIBOSYN2-PWY: flavin biosynthesis I (bacteria and plants)	1.11637	0.0122398
PWY-7228: superpathway of guanosine nucleotides de novo biosynthesis I	1.72439	0.0137687
FOLSYN-PWY: superpathway of tetrahydrofolate biosynthesis and salvage	-0.634262	0.0149121
PWY-6628: superpathway of L-phenylalanine biosynthesis	0.599209	0.0151769
PWY-6126: superpathway of adenosine nucleotides de novo biosynthesis II	1.97222	0.0152809
HEME-BIOSYNTHESIS-II: heme biosynthesis I (aerobic)	0.99854	0.0160299
PWY-7187: pyrimidine deoxyribonucleotides de novo biosynthesis II	1.40563	0.0167984
PWY0-166: superpathway of pyrimidine deoxyribonucleotides de novo biosynthesis (E. coli)	1.66324	0.0193151
PWY-1269: CMP-3-deoxy-D-manno-octulosonate biosynthesis I	0.60872	0.0200806
PWY-6703: preQ0 biosynthesis	1.35186	0.0201585
PWY-5189: tetrapyrrole biosynthesis II (from glycine)	1.37182	0.0206102
"PWY-724: superpathway of L-lysine, L-threonine and L-methionine biosynthesis II"	1.79243	0.0236901
PWY-6749: CMP-legionaminate biosynthesis I	-1.89953	0.0266593
PWY-6125: superpathway of guanosine nucleotides de novo biosynthesis II	1.62614	0.0280261
PWY-5347: superpathway of L-methionine biosynthesis (transsulfuration)	1.12478	0.0283838
OANTIGEN-PWY: O-antigen building blocks biosynthesis (E. coli)	1.01664	0.0291976
PWY-6121: 5-aminoimidazole ribonucleotide biosynthesis I	1.84021	0.0298474
NONOXIPENT-PWY: pentose phosphate pathway (non-oxidative branch)	1.181	0.0308851
PWY-6122: 5-aminoimidazole ribonucleotide biosynthesis II	1.80169	0.0336366
PWY-6277: superpathway of 5-aminoimidazole ribonucleotide biosynthesis	1.80169	0.0336366
PWY-7184: pyrimidine deoxyribonucleotides de novo biosynthesis I	1.50844	0.0351559
PWY-6123: inosine-5'-phosphate biosynthesis I	1.42488	0.0357732
GLUCONEO-PWY: gluconeogenesis I	0.281537	0.0368403
"GLCMANNANAUT-PWY: superpathway of N-acetylglucosamine, N-acetylmannosamine and N-acetylneuraminate degradation"	0.695258	0.0374046
"PWY-241: C4 photosynthetic carbon assimilation cycle, NADP-ME type"	-0.666725	0.0383503
PWY-7220: adenosine deoxyribonucleotides de novo biosynthesis II	1.47865	0.0385844
PWY-7222: guanosine deoxyribonucleotides de novo biosynthesis II	1.47865	0.0385844
PWY-7431: aromatic biogenic amine degradation (bacteria)	-4.89621	0.0388997
PWY-7111: pyruvate fermentation to isobutanol (engineered)	1.87515	0.0390106
PWY-7208: superpathway of pyrimidine nucleobases salvage	1.50011	0.0390999
ILEUSYN-PWY: L-isoleucine biosynthesis I (from threonine)	1.88901	0.0416107
VALSYN-PWY: L-valine biosynthesis	1.88901	0.0416107
METSYN-PWY: L-homoserine and L-methionine biosynthesis	1.31001	0.0434645
DENOVOPURINE2-PWY: superpathway of purine nucleotides de novo biosynthesis II	1.49543	0.0446685
PWY-2941: L-lysine biosynthesis II	1.3574	0.0461662
MET-SAM-PWY: superpathway of S-adenosyl-L-methionine biosynthesis	1.32893	0.0465852
PWY-5918: superpathay of heme biosynthesis from glutamate	1.23014	0.0490022
PWY-6595: superpathway of guanosine nucleotides degradation (plants)	-1.11979	0.0502832
PWY-6519: 8-amino-7-oxononanoate biosynthesis I	-0.3251	0.0522973
PWY-841: superpathway of purine nucleotides de novo biosynthesis I	1.62075	0.0547945
PWY-7282: 4-amino-2-methyl-5-phosphomethylpyrimidine biosynthesis (yeast)	1.22491	0.0590236
PWY-3841: folate transformations II	1.2077	0.0599414
PWY-7196: superpathway of pyrimidine ribonucleosides salvage	-3.32977	0.0602622
"PWY-5464: superpathway of cytosolic glycolysis (plants), pyruvate dehydrogenase and TCA cycle"	-0.937467	0.0605758
POLYISOPRENSYN-PWY: polyisoprenoid biosynthesis (E. coli)	-0.782719	0.0636762
HOMOSER-METSYN-PWY: L-methionine biosynthesis I	0.905517	0.0640489
BIOTIN-BIOSYNTHESIS-PWY: biotin biosynthesis I	-0.186874	0.0674368
ANAGLYCOLYSIS-PWY: glycolysis III (from glucose)	1.4898	0.0700531
TRPSYN-PWY: L-tryptophan biosynthesis	1.01885	0.0711481
BRANCHED-CHAIN-AA-SYN-PWY: superpathway of branched amino acid biosynthesis	1.78359	0.0714418
PWY-5030: L-histidine degradation III	0.0326895	0.0743519
PWY66-422: D-galactose degradation V (Leloir pathway)	1.12903	0.0756047
HSERMETANA-PWY: L-methionine biosynthesis III	0.775868	0.0803638
PWY-7197: pyrimidine deoxyribonucleotide phosphorylation	1.19007	0.0824632
PWY-3001: superpathway of L-isoleucine biosynthesis I	1.72492	0.08448
THRESYN-PWY: superpathway of L-threonine biosynthesis	1.67962	0.0935066
PWY-5103: L-isoleucine biosynthesis III	1.74962	0.094614
PWY1F-823: leucopelargonidin and leucocyanidin biosynthesis	-1.57367	0.0953699
PWY-6305: putrescine biosynthesis IV	-1.35273	0.0958398
PWY-5910: superpathway of geranylgeranyldiphosphate biosynthesis I (via mevalonate)	-1.64228	0.0962367
PWY-7392: taxadiene biosynthesis (engineered)	-1.28832	0.0980965
PWY-6317: galactose degradation I (Leloir pathway)	1.0689	0.101168
PWY-6901: superpathway of glucose and xylose degradation	-0.231288	0.102729
ANAEROFRUCAT-PWY: homolactic fermentation	1.02208	0.105438
NAD-BIOSYNTHESIS-II: NAD salvage pathway II	0.130011	0.109742
PWY-5188: tetrapyrrole biosynthesis I (from glutamate)	1.46839	0.109999
P161-PWY: acetylene degradation	-1.05509	0.110905
"PWY-7237: myo-, chiro- and scillo-inositol degradation"	-1.66793	0.111285
FERMENTATION-PWY: mixed acid fermentation	0.0153023	0.113572
"PWY-7117: C4 photosynthetic carbon assimilation cycle, PEPCK type"	0.39511	0.120849
P163-PWY: L-lysine fermentation to acetate and butanoate	-0.794491	0.124763
HEMESYN2-PWY: heme biosynthesis II (anaerobic)	1.1985	0.125303
"PWY-7013: L-1,2-propanediol degradation"	-1.5097	0.125321
P441-PWY: superpathway of N-acetylneuraminate degradation	0.174926	0.128624
PWY1G-0: mycothiol biosynthesis	-4.27324	0.131109
PWY-5101: L-isoleucine biosynthesis II	-3.25833	0.137136
PWY-7268: NAD/NADP-NADH/NADPH cytosolic interconversion (yeast)	-1.69352	0.139383
PENTOSE-P-PWY: pentose phosphate pathway	0.79986	0.140467
P105-PWY: TCA cycle IV (2-oxoglutarate decarboxylase)	-2.37735	0.142006
PWY-7254: TCA cycle VII (acetate-producers)	-1.64356	0.142204
POLYAMINSYN3-PWY: superpathway of polyamine biosynthesis II	-3.13895	0.151618
REDCITCYC: TCA cycle VIII (helicobacter)	-1.59659	0.152998
UDPNAGSYN-PWY: UDP-N-acetyl-D-glucosamine biosynthesis I	0.887032	0.161979
PWYG-321: mycolate biosynthesis	0.906028	0.173376
P108-PWY: pyruvate fermentation to propanoate I	-2.04479	0.173846
PWY-922: mevalonate pathway I	-0.316016	0.176177
LACTOSECAT-PWY: lactose and galactose degradation I	0.719933	0.178579
PYRIDNUCSAL-PWY: NAD salvage pathway I	-1.17572	0.184201
GLUCOSE1PMETAB-PWY: glucose and glucose-1-phosphate degradation	-1.69825	0.185378
TCA: TCA cycle I (prokaryotic)	-0.15135	0.188284
PWY-5913: TCA cycle VI (obligate autotrophs)	-0.00811907	0.190225
PWY-5484: glycolysis II (from fructose 6-phosphate)	0.908312	0.192649
PWY0-1061: superpathway of L-alanine biosynthesis	1.16537	0.193372
PWY-5659: GDP-mannose biosynthesis	-0.0668914	0.195536
PWY-5384: sucrose degradation IV (sucrose phosphorylase)	-1.20058	0.203032
PWY0-1261: anhydromuropeptides recycling	0.75229	0.203453
PWY66-400: glycolysis VI (metazoan)	1.00167	0.204851
PWY-6263: superpathway of menaquinol-8 biosynthesis II	-1.67275	0.204868
PWY-6803: phosphatidylcholine acyl editing	-1.09316	0.210451
GLYOXYLATE-BYPASS: glyoxylate cycle	-2.67832	0.212633
GLYCOLYSIS: glycolysis I (from glucose 6-phosphate)	0.954149	0.217148
PWY-7234: inosine-5'-phosphate biosynthesis III	1.05537	0.22238
PWY-6748: nitrate reduction VII (denitrification)	-3.63178	0.240093
P185-PWY: formaldehyde assimilation III (dihydroxyacetone cycle)	0.0648104	0.240769
HEXITOLDEGSUPER-PWY: superpathway of hexitol degradation (bacteria)	0.198769	0.248318
PWY-6936: seleno-amino acid biosynthesis	1.1977	0.253649
"P4-PWY: superpathway of L-lysine, L-threonine and L-methionine biosynthesis I"	0.63506	0.264823
PWY-5971: palmitate biosynthesis II (bacteria and plants)	0.948794	0.266302
PWY-6168: flavin biosynthesis III (fungi)	0.819684	0.269642
P42-PWY: incomplete reductive TCA cycle	0.0966891	0.282933
PWY0-845: superpathway of pyridoxal 5'-phosphate biosynthesis and salvage	0.405666	0.287012
HISDEG-PWY: L-histidine degradation I	-0.284447	0.287224
PWY-5920: superpathway of heme biosynthesis from glycine	-0.189978	0.303418
PWY-5088: L-glutamate degradation VIII (to propanoate)	-3.40274	0.311762
PWY0-1415: superpathway of heme biosynthesis from uroporphyrinogen-III	-0.394575	0.328501
GLYCOLYSIS-E-D: superpathway of glycolysis and Entner-Doudoroff	-0.00700923	0.342099
TCA-GLYOX-BYPASS: superpathway of glyoxylate bypass and TCA	-2.12501	0.342652
PYRIDOXSYN-PWY: pyridoxal 5'-phosphate biosynthesis I	0.0121506	0.34768
DENITRIFICATION-PWY: nitrate reduction I (denitrification)	-3.57184	0.349188
NAGLIPASYN-PWY: lipid IVA biosynthesis	0.136237	0.350505
PWY-5154: L-arginine biosynthesis III (via N-acetyl-L-citrulline)	-0.210736	0.351456
PWY0-162: superpathway of pyrimidine ribonucleotides de novo biosynthesis	0.822622	0.35375
ARGSYNBSUB-PWY: L-arginine biosynthesis II (acetyl cycle)	-0.0175609	0.360203
PWY-5173: superpathway of acetyl-CoA biosynthesis	-0.677836	0.366613
P122-PWY: heterolactic fermentation	-0.639314	0.373223
PWY0-781: aspartate superpathway	0.367046	0.377655
PWY-6113: superpathway of mycolate biosynthesis	-0.0257233	0.394907
TEICHOICACID-PWY: teichoic acid (poly-glycerol) biosynthesis	-3.01202	0.40485
PWY-7539: 6-hydroxymethyl-dihydropterin diphosphate biosynthesis III (Chlamydia)	0.361864	0.409598
DAPLYSINESYN-PWY: L-lysine biosynthesis I	0.517053	0.417263
PWY0-1241: ADP-L-glycero-&beta;-D-manno-heptose biosynthesis	-0.786775	0.430552
PWY-6285: superpathway of fatty acids biosynthesis (E. coli)	-0.337426	0.453175
SULFATE-CYS-PWY: superpathway of sulfate assimilation and cysteine biosynthesis	-0.442505	0.472335
PWY-5345: superpathway of L-methionine biosynthesis (by sulfhydrylation)	-0.373431	0.491237
PWY-6284: superpathway of unsaturated fatty acids biosynthesis (E. coli)	-0.870581	0.504612
PWY-3781: aerobic respiration I (cytochrome c)	-0.352774	0.525875
PWY66-399: gluconeogenesis III	0.145251	0.527142
PWY-5367: petroselinate biosynthesis	-2.09685	0.540418
"GLYCOLYSIS-TCA-GLYOX-BYPASS: superpathway of glycolysis, pyruvate dehydrogenase, TCA, and glyoxylate bypass"	-1.74213	0.553272
SO4ASSIM-PWY: sulfate reduction I (assimilatory)	-1.09604	0.568357
P124-PWY: Bifidobacterium shunt	-2.65502	0.568651
PWY-5083: NAD/NADH phosphorylation and dephosphorylation	-0.842424	0.579589
PWY-7211: superpathway of pyrimidine deoxyribonucleotides de novo biosynthesis	-1.51246	0.611815
"PWY-7383: anaerobic energy metabolism (invertebrates, cytosol)"	-0.0293231	0.63263
PWY-7210: pyrimidine deoxyribonucleotides biosynthesis from CTP	-2.08177	0.64524
PWY-7279: aerobic respiration II (cytochrome c) (yeast)	-0.976177	0.65435
PWY-5675: nitrate reduction V (assimilatory)	-3.00825	0.659158
PWY0-1479: tRNA processing	-0.623614	0.667709
PWY-7198: pyrimidine deoxyribonucleotides de novo biosynthesis IV	-2.40595	0.684317
CITRULBIO-PWY: L-citrulline biosynthesis	-2.60085	0.686768
PWY-6562: norspermidine biosynthesis	-3.39475	0.712114
PWY-4984: urea cycle	-3.00402	0.898979
