# Supplementary material for: Deep metagenomics examines the oral microbiome during dental caries, revealing novel taxa and co-occurrences with host molecules
Source: HighWire-hosted journal article supplement (doi:10.1101/gr.265645.120), 2020-11-25
Supplement: Supplemental_Table_S7.xlsx [file Supplemental_Table_S7.xlsx]

## Sheet: conditionals
Supplemental Table S7. Conditional probabilities of the microbe-host marker co-occurrences (mmvec)
	EGF	FGF2	TGFA	CSF3	FLT3LG	CSF2	CX3CL1	IFNA2	IFNG	CXCL1P1	IL10	CCL7	IL12B	CCL22	IL12	IL13	IL15	IL1RN	IL1A	IL1B	IL5	IL6	IL7	IL8	CXCL10	CCL2	CCL3	CCL4	TNF	LTA	VEGFA
s__Prevotella_melaninogenica	0.18611	0.173985	-0.353831	-0.425559	0.19615	-0.11689	0.168792	0.0884725	0.0750977	-0.150677	0.0890874	0.120096	0.15468	0.174205	0.13835	0.115042	-0.0493408	0.00214419	-0.0497535	-0.202606	-0.224374	-0.179768	0.129126	-0.175618	0.0754676	0.131315	-0.022556	-0.044845	-0.181639	0.0394945	0.119843
s__Veillonella_unclassified	0.18659	0.0638313	-0.195666	-0.24206	0.0648213	-0.0594019	0.030474	0.000749284	0.0326729	-0.0380609	0.0260434	0.0550062	0.0375318	0.0643603	0.0364745	0.042966	-0.0234234	-0.0253819	-0.0470396	-0.105608	-0.0633315	-0.111802	0.047853	0.0269879	0.0340237	0.0241868	0.0757338	0.0314504	-0.0691023	0.0464787	0.0526413
s__Rothia_mucilaginosa	0.173286	0.205801	-0.582747	-0.724503	0.208119	-0.167298	0.102291	0.0126451	0.112334	-0.0998055	0.0912477	0.180214	0.124713	0.207438	0.121985	0.142961	-0.0577753	-0.0656254	-0.131169	-0.307991	-0.175834	-0.328024	0.15767	0.103245	0.11652	0.0840313	0.249526	0.11264	-0.195234	0.156466	0.172872
s__Haemophilus_parainfluenzae	0.143911	0.167698	-0.525669	-0.658445	0.162499	-0.145919	0.0541769	-0.0175151	0.0982687	-0.0588456	0.069859	0.158109	0.0841179	0.169445	0.0868123	0.118372	-0.047594	-0.0744207	-0.129235	-0.272599	-0.117688	-0.302943	0.129816	0.176179	0.102803	0.0469892	0.285439	0.140727	-0.154313	0.159949	0.150016
s__Veillonella_parvula	0.17942	0.167067	-0.256903	-0.297521	0.200001	-0.0967779	0.209939	0.130511	0.0609721	-0.181876	0.0928379	0.0967955	0.177228	0.1666	0.153466	0.107329	-0.0467461	0.0362568	-0.0113211	-0.159422	-0.257815	-0.114471	0.121755	-0.319979	0.0594841	0.161298	-0.156552	-0.123562	-0.182588	-0.015442	0.100015
s__Prevotella_salivae	0.346989	0.0263119	0.118087	0.172111	0.0594461	0.00306469	0.142222	0.119734	-0.0216758	-0.132752	0.0263215	-0.0302853	0.0924209	0.0247018	0.0692353	0.00626866	-0.0190158	0.0738461	0.0684686	0.0331442	-0.160865	0.0942161	0.0114272	-0.417053	-0.0261041	0.10342	-0.344708	-0.216414	-0.068309	-0.132379	-0.0218756
s__Streptococcus_sanguinis	0.243989	0.137111	-0.288293	-0.346093	0.154984	-0.0973443	0.132954	0.0682096	0.0573945	-0.12461	0.0686822	0.0936612	0.121567	0.137287	0.108399	0.0895969	-0.0429039	-0.00138341	-0.0432149	-0.166425	-0.184018	-0.148002	0.100951	-0.144783	0.0576915	0.102737	-0.0213953	-0.0393289	-0.14955	0.0286706	0.0934599
s__Solobacterium_moorei	0.240724	0.0276005	0.0295891	0.0516555	0.0469191	-0.0100279	0.0879468	0.0691278	-0.0062181	-0.0842248	0.0201821	-0.00679962	0.0605899	0.0267752	0.0470001	0.0119329	-0.0157037	0.0375088	0.0301502	-0.00174459	-0.105415	0.0322876	0.0158703	-0.235535	-0.00850863	0.0643165	-0.184203	-0.118856	-0.0531285	-0.0674004	-0.00241034
s__Streptococcus_parasanguinis	0.189762	0.11938	-0.228418	-0.271496	0.137711	-0.079726	0.127544	0.0709458	0.0476528	-0.116263	0.0619514	0.0772244	0.11298	0.119366	0.0995988	0.0774883	-0.0362561	0.00792596	-0.0277221	-0.134678	-0.168948	-0.113077	0.0875355	-0.161775	0.0474569	0.0982833	-0.0509476	-0.0531009	-0.130716	0.0124167	0.077901
s__Atopobium_parvulum	0.211472	-0.0229061	0.151001	0.200759	-0.00695415	0.0265191	0.051111	0.0546565	-0.0313049	-0.0514321	-0.00420846	-0.0466248	0.0229079	-0.0239667	0.0119259	-0.0225302	-0.00223533	0.0448128	0.0528581	0.0643022	-0.052881	0.0976707	-0.022388	-0.224684	-0.0341705	0.0349674	-0.212899	-0.127332	-0.00409889	-0.0930666	-0.0412819
s__Veillonella_atypica	0.284205	0.101922	-0.0862487	-0.0835077	0.135027	-0.0520787	0.178433	0.12496	0.0222549	-0.160668	0.0616037	0.0377619	0.137797	0.100929	0.114243	0.0602683	-0.0350388	0.052689	0.0243744	-0.0722969	-0.214828	-0.0198367	0.070473	-0.366229	0.0194133	0.134194	-0.244233	-0.167405	-0.131465	-0.0700856	0.0433722
s__Veillonella_dispar	0.210738	0.15334	-0.242764	-0.281498	0.18341	-0.0917668	0.191221	0.117702	0.0554515	-0.168593	0.0842693	0.0889352	0.161648	0.152934	0.13994	0.098102	-0.044828	0.0307943	-0.0133842	-0.15058	-0.238767	-0.109814	0.111435	-0.292161	0.0541438	0.146633	-0.141346	-0.112877	-0.170375	-0.0137299	0.0917849
s__Streptococcus_salivarius	0.234442	0.120835	-0.197249	-0.228432	0.144914	-0.075857	0.151041	0.0920707	0.0423482	-0.137288	0.0653963	0.0692382	0.12739	0.120512	0.110006	0.0765333	-0.0381443	0.0223939	-0.0130562	-0.123114	-0.193564	-0.0904981	0.0872263	-0.235981	0.0413062	0.11532	-0.115056	-0.0924251	-0.138829	-0.0129899	0.071511
s__Oribacterium_sinus	0.184056	0.136533	-0.31931	-0.389032	0.148754	-0.100865	0.110529	0.0479823	0.0633265	-0.103532	0.0659724	0.102335	0.108118	0.137017	0.0988853	0.0912954	-0.0405928	-0.0151793	-0.0573055	-0.177732	-0.159522	-0.170179	0.102036	-0.0710635	0.0644625	0.0866414	0.0426104	8.01025e-05	-0.141323	0.0544508	0.100552
s__Streptococcus_intermedius	0.235637	-0.0970486	0.281781	0.357357	-0.0915082	0.0689126	-0.0266315	0.0098779	-0.0638719	0.0109979	-0.0446695	-0.0966236	-0.0468037	-0.0981177	-0.0501751	-0.0723091	0.014437	0.0365245	0.065422	0.139233	0.0401602	0.160559	-0.0780066	-0.138476	-0.066668	-0.0260117	-0.190949	-0.102804	0.067468	-0.106103	-0.0915913
s__Streptococcus_mitis_oralis_pneumoniae	0.158716	0.0190324	-0.0192884	-0.0177472	0.0266492	-0.0140762	0.0373347	0.0255825	0.0012662	-0.0395426	0.0104726	0.0044056	0.0278229	0.0187931	0.0224105	0.00983301	-0.0108506	0.00942383	0.00331688	-0.0178346	-0.0515405	-0.00561237	0.0120912	-0.0882333	0.000584258	0.0272532	-0.0610479	-0.0424584	-0.0321981	-0.0203044	0.00574605
s__Fusobacterium_nucleatum	0.166482	0.112664	-0.303365	-0.374198	0.117408	-0.0912058	0.0690013	0.018235	0.0571475	-0.0690851	0.0508231	0.0928854	0.0758566	0.113378	0.0719402	0.0766274	-0.0344066	-0.0288566	-0.0648077	-0.163989	-0.113092	-0.168367	0.0851115	0.0105666	0.0589405	0.0550537	0.0971629	0.0367864	-0.11381	0.069304	0.0898081
s__Gemella_morbillorum	0.216073	0.145528	-0.235119	-0.273168	0.17369	-0.0885461	0.179644	0.109719	0.0527556	-0.159557	0.0794461	0.0849484	0.152264	0.145169	0.13192	0.093048	-0.0432333	0.0274133	-0.0147549	-0.145366	-0.226178	-0.107484	0.10571	-0.272562	0.0515858	0.137697	-0.129601	-0.104717	-0.162444	-0.0114016	0.0875204
s__Granulicatella_adiacens	0.289041	0.0949875	-0.146811	-0.166416	0.11694	-0.0618135	0.129293	0.0808698	0.0288948	-0.122487	0.0513894	0.0492583	0.10616	0.0945867	0.090378	0.0583226	-0.0341649	0.0218968	-0.00647166	-0.0962401	-0.169304	-0.0650308	0.0672015	-0.225981	0.0276722	0.0976687	-0.124296	-0.094821	-0.117833	-0.0247014	0.0518112
s__Prevotella_oulorum	0.287611	0.0336191	-0.0225705	-0.0157827	0.0488181	-0.0229723	0.0729875	0.0517832	0.000465866	-0.0757532	0.0194604	0.00498357	0.0533465	0.0330969	0.0425744	0.0168292	-0.0193688	0.0214539	0.01093	-0.0268296	-0.0978053	-0.00182062	0.0209693	-0.1786	-0.00100959	0.053267	-0.127955	-0.0871399	-0.0585485	-0.0439005	0.00786068
s__Campylobacter_concisus	0.212349	0.0925561	-0.228545	-0.278176	0.100704	-0.0737497	0.0728045	0.0292005	0.0418011	-0.0738616	0.0430362	0.0692893	0.0717578	0.0929164	0.0655786	0.0610678	-0.0311642	-0.014532	-0.0440267	-0.128085	-0.112791	-0.123575	0.0685387	-0.0473921	0.0426557	0.056543	0.0314474	-6.25348e-05	-0.101219	0.0370063	0.0679288
s__Gemella_haemolysans	0.270151	0.0302255	-0.0640649	-0.072651	0.0379482	-0.0292479	0.0409984	0.0229412	0.00592854	-0.049699	0.0135583	0.0138872	0.033161	0.0301048	0.0275962	0.0166139	-0.0182321	0.00132361	-0.00941268	-0.0430164	-0.0670284	-0.0323193	0.019904	-0.08352	0.00555063	0.0296928	-0.0461087	-0.0374324	-0.0492216	-0.0123242	0.0146932
s__Prevotella_pallens	0.180472	0.0414647	-0.0150838	-0.00585215	0.0588976	-0.0197531	0.0877287	0.064283	0.00433404	-0.0810569	0.0263633	0.00883522	0.0649434	0.0408483	0.052599	0.0228175	-0.0167236	0.0302417	0.0188187	-0.0227583	-0.105614	0.00616804	0.0274236	-0.201236	0.00259704	0.0652642	-0.14455	-0.0962865	-0.0603304	-0.0470688	0.012214
s__Fusobacterium_periodonticum	0.143729	0.155589	-0.428176	-0.530868	0.159309	-0.124616	0.0851895	0.0168496	0.0828645	-0.0823255	0.0699858	0.133074	0.098958	0.156716	0.0955292	0.107428	-0.0440958	-0.0443927	-0.0936953	-0.227949	-0.140826	-0.239257	0.118729	0.05236	0.0857271	0.0692169	0.166013	0.0714137	-0.149773	0.109205	0.128091
s__Streptococcus_infantis	0.173682	0.168794	-0.429097	-0.528076	0.17812	-0.129202	0.113844	0.0384135	0.0845877	-0.107022	0.0789189	0.135895	0.120152	0.169713	0.112759	0.114949	-0.0482751	-0.0333938	-0.0860372	-0.232773	-0.173042	-0.234653	0.127658	-0.0121271	0.0868686	0.0907258	0.119035	0.0407042	-0.167292	0.0941305	0.13204
s__Capnocytophaga_unclassified	0.222903	0.125818	-0.285519	-0.345727	0.139255	-0.0932118	0.109845	0.0510303	0.055512	-0.104849	0.061185	0.0906611	0.104265	0.126152	0.0942383	0.0830232	-0.0394974	-0.00993199	-0.0488834	-0.161585	-0.158039	-0.150532	0.0932107	-0.0943555	0.0562528	0.0853373	0.0146669	-0.0156051	-0.135103	0.0398873	0.0895969
s__Abiotrophia_defectiva	0.33968	0.0855382	-0.145927	-0.166669	0.104794	-0.0610522	0.11291	0.0682893	0.0253688	-0.112397	0.0445046	0.0448994	0.0932497	0.0852293	0.0793796	0.0518803	-0.0340939	0.0147317	-0.0117398	-0.0947291	-0.155267	-0.0679457	0.0600181	-0.197745	0.024406	0.0847918	-0.105111	-0.0828103	-0.110749	-0.0203796	0.0469455
s__Neisseria_unclassified	0.0961367	0.191819	-0.638779	-0.804807	0.179384	-0.171484	0.0365321	-0.0432326	0.119584	-0.0434018	0.0770901	0.1914	0.0811667	0.194175	0.0887612	0.137812	-0.0519634	-0.101183	-0.16443	-0.325782	-0.107023	-0.373045	0.150245	0.286569	0.125749	0.0355257	0.400849	0.20662	-0.167674	0.213086	0.180301
s__Prevotella_nanceiensis	0.211555	0.171723	-0.412809	-0.504718	0.185165	-0.128247	0.131447	0.05344	0.0817768	-0.123129	0.082131	0.131846	0.131505	0.172438	0.121234	0.115539	-0.0503363	-0.0238832	-0.0770342	-0.227729	-0.192459	-0.221962	0.128854	-0.0641023	0.0834965	0.103547	0.0756999	0.0136661	-0.175147	0.0774389	0.129055
s__Eubacterium_infirmum	0.185374	0.0542158	-0.0579547	-0.0599286	0.0707382	-0.0311759	0.0898391	0.0611285	0.0123848	-0.0836046	0.0314624	0.0216969	0.0701526	0.0537605	0.0583715	0.0320156	-0.0201208	0.0233345	0.00770631	-0.0445457	-0.112336	-0.0189211	0.0374383	-0.18108	0.0110698	0.0674024	-0.116949	-0.081954	-0.0713243	-0.0325109	0.0243149
s__Rothia_dentocariosa	0.238613	0.169303	-0.355026	-0.427325	0.190391	-0.117793	0.161251	0.0823792	0.0727091	-0.147791	0.0853376	0.117429	0.148546	0.169561	0.13298	0.111512	-0.0504298	-0.00184657	-0.053039	-0.203324	-0.219972	-0.182274	0.125312	-0.165306	0.0731864	0.125162	-0.0157447	-0.0410168	-0.180035	0.0402822	0.116968
s__Rothia_aeria	0.231223	0.167125	-0.377326	-0.45794	0.18409	-0.121147	0.143431	0.0663919	0.0755142	-0.133405	0.0819038	0.122055	0.137205	0.167602	0.124511	0.111154	-0.0498203	-0.0129469	-0.0641839	-0.211984	-0.2029	-0.198797	0.12447	-0.11311	0.0765915	0.111998	0.0289975	-0.0138324	-0.174761	0.0574276	0.120461
s__Actinomyces_graevenitzii	0.135841	0.0467325	-0.00924697	0.00244817	0.0662655	-0.0184111	0.0996064	0.0741539	0.00596533	-0.0878151	0.0308754	0.0103729	0.0738355	0.0460256	0.0600142	0.0264093	-0.0160479	0.0367086	0.0245145	-0.0204524	-0.114643	0.0121844	0.031437	-0.224542	0.00397734	0.0745798	-0.162339	-0.106906	-0.0636637	-0.0521118	0.0142324
s__Actinomyces_odontolyticus	0.229174	0.0342717	-0.0662508	-0.075352	0.0425515	-0.0292258	0.0459019	0.0266051	0.00828655	-0.0512075	0.0164843	0.0167702	0.0374805	0.0341411	0.031515	0.0197222	-0.017495	0.00348184	-0.00798225	-0.0438852	-0.0697339	-0.0323989	0.0232393	-0.0876282	0.00787816	0.0337918	-0.0476193	-0.0382125	-0.050624	-0.0113202	0.0176401
s__Prevotella_histicola	0.386931	-0.0395446	0.229972	0.305841	-0.0159302	0.0392635	0.0717215	0.0783077	-0.0506092	-0.0773005	-0.0101259	-0.074328	0.0295777	-0.0411413	0.0133373	-0.0380551	-0.00498986	0.0648756	0.077775	0.0973642	-0.0783207	0.14713	-0.0380624	-0.337159	-0.0549195	0.0480594	-0.321858	-0.192974	-0.00571329	-0.142826	-0.0662983
s__candidate_division_TM7_single_cell_isolate_TM7c	0.191775	0.244871	-0.340889	-0.389695	0.296882	-0.132651	0.324344	0.208189	0.0868186	-0.275159	0.139719	0.136174	0.269954	0.243949	0.232544	0.157006	-0.0653452	0.0672498	-0.00101848	-0.216529	-0.387279	-0.142978	0.178275	-0.516758	0.0839947	0.249165	-0.273551	-0.206076	-0.265749	-0.0393273	0.142094
s__Megasphaera_micronuciformis	0.211579	0.0102906	0.0126031	0.023804	0.0198843	-0.0077768	0.040445	0.0312462	-0.00635381	-0.0447519	0.00679747	-0.00675673	0.0268162	0.00987777	0.0200692	0.00261231	-0.0107806	0.0156691	0.0121233	-0.00342526	-0.0551518	0.0135159	0.00454375	-0.120265	-0.00749879	0.028736	-0.0950087	-0.0623137	-0.0291426	-0.0368238	-0.00456377
s__Prevotella_nigrescens	0.229086	0.107179	-0.184566	-0.215076	0.127563	-0.0698318	0.129596	0.0771848	0.0381877	-0.119662	0.0570088	0.062887	0.110306	0.106954	0.0955576	0.0679379	-0.0347669	0.0160775	-0.0157749	-0.113873	-0.169396	-0.0869484	0.0773957	-0.196913	0.0374326	0.0989163	-0.0905506	-0.0755138	-0.12379	-0.00719396	0.0645871
s__Prevotella_oris	0.327617	0.00933045	0.058137	0.0869316	0.0270087	-0.00314686	0.0711499	0.0591345	-0.0162906	-0.0755945	0.00931269	-0.0208704	0.0445848	0.00847175	0.0322142	-0.00137558	-0.0149054	0.0346367	0.0317546	0.0128731	-0.0906082	0.0454522	0.00137952	-0.227234	-0.0186524	0.0504449	-0.188607	-0.120187	-0.0412317	-0.0753441	-0.0163851
s__Leptotrichia_unclassified	0.127144	0.00419679	-0.0443804	-0.0558741	0.00188176	-0.0138818	-0.00982194	-0.0129221	0.00277025	-0.000308595	-0.00187979	0.00700407	-0.00496838	0.00440208	-0.00340706	0.00233857	-0.00644802	-0.0136971	-0.0167779	-0.0235573	-0.0022726	-0.0291135	0.00273914	0.0313799	0.0033181	-0.00793545	0.0338155	0.0171153	-0.0101118	0.0132565	0.00599585
s__Granulicatella_unclassified	0.174596	0.108678	-0.243332	-0.294575	0.120428	-0.0792605	0.0957865	0.0452081	0.0480714	-0.0901777	0.0532672	0.0781456	0.0906581	0.108953	0.0819015	0.0718507	-0.0333632	-0.00737345	-0.0408043	-0.13767	-0.135973	-0.127771	0.0806203	-0.0831496	0.0486758	0.0745072	0.0108178	-0.0142466	-0.115669	0.0339097	0.0772915
s__Gemella_sanguinis	0.16735	0.0684979	-0.185269	-0.227293	0.0724439	-0.0579578	0.0451364	0.0131332	0.0327797	-0.0484957	0.0303566	0.0545565	0.0478314	0.0688887	0.0447021	0.0456545	-0.0236058	-0.0173239	-0.0396629	-0.101922	-0.0765034	-0.102742	0.051046	-0.0081218	0.0337493	0.0353395	0.047515	0.0142265	-0.0740968	0.0368693	0.0529175
s__Peptostreptococcus_stomatis	0.273073	-0.000319295	0.0144717	0.0247867	0.00645228	-0.00692301	0.0228123	0.0177772	-0.0105759	-0.0342957	-0.000888683	-0.0119938	0.0127638	-0.000639627	0.00801986	-0.00472192	-0.0108816	0.00802485	0.00660084	-0.00148791	-0.0404103	0.010872	-0.00359613	-0.0912857	-0.0114585	0.0148049	-0.0757964	-0.0503048	-0.0216239	-0.0329413	-0.0103147
s__candidate_division_TM7_single_cell_isolate_TM7b	0.18676	0.241267	-0.348462	-0.400885	0.290706	-0.132974	0.312183	0.198125	0.087299	-0.265242	0.13657	0.137051	0.261557	0.240464	0.225952	0.155203	-0.0643952	0.0610462	-0.00654578	-0.218621	-0.374886	-0.149716	0.176014	-0.485651	0.0848012	0.240079	-0.248622	-0.19053	-0.26044	-0.0304569	0.14235
s__Granulicatella_elegans	0.318715	0.105976	-0.177248	-0.203783	0.128511	-0.0713458	0.136277	0.08269	0.0341608	-0.13024	0.0561762	0.0580805	0.113671	0.105642	0.0974211	0.0656325	-0.0380722	0.0188461	-0.0131452	-0.112975	-0.18156	-0.082007	0.0753789	-0.226664	0.0331037	0.103129	-0.116061	-0.092226	-0.129863	-0.0185738	0.060352
s__Dialister_invisus	0.241724	-0.00934931	0.0446595	0.0622933	-0.00245379	0.00212526	0.0196741	0.0188618	-0.015379	-0.0295206	-0.0043169	-0.020178	0.00817252	-0.00976121	0.00339592	-0.0108226	-0.00734722	0.0126082	0.0143508	0.0146557	-0.0321188	0.0284327	-0.0103791	-0.0984761	-0.016498	0.0122818	-0.0896219	-0.0565176	-0.0117208	-0.0406954	-0.0180796
s__Selenomonas_noxia	0.212822	0.0279517	-0.0167033	-0.0108833	0.0404095	-0.0177789	0.0604166	0.0431917	0.000936417	-0.0611764	0.0165483	0.00451868	0.0442722	0.0275205	0.0354448	0.0142981	-0.015021	0.0184646	0.00995354	-0.0206889	-0.0791209	-0.000147487	0.0176662	-0.145868	-0.000280859	0.0442801	-0.104605	-0.0708941	-0.0468985	-0.0355198	0.00689088
s__Porphyromonas_catoniae	0.265454	0.0363817	-0.138217	-0.170575	0.0360309	-0.0445045	0.0107759	-0.00822172	0.0172092	-0.0262502	0.0113622	0.0322574	0.0169613	0.0367809	0.0169653	0.0231756	-0.0200127	-0.0241295	-0.0383057	-0.0760109	-0.042128	-0.0819662	0.0262545	0.0254521	0.018238	0.00779157	0.0555296	0.0223137	-0.0487596	0.0297118	0.0304363
s__Porphyromonas_sp_oral_taxon_279	0.189256	0.142666	-0.610222	-0.777409	0.116536	-0.15699	-0.0442921	-0.10195	0.103375	0.0160287	0.0445977	0.168787	0.0171581	0.145433	0.0344967	0.105881	-0.0444999	-0.130015	-0.181559	-0.302949	-0.0251992	-0.371918	0.114095	0.431079	0.110715	-0.0269994	0.494913	0.268875	-0.120342	0.235086	0.155366
s__Peptostreptococcus_unclassified	0.317512	0.0317519	-0.00140237	0.0127146	0.0497211	-0.0196047	0.0829681	0.0615856	-0.00367214	-0.0852287	0.0198077	-0.00119763	0.0586628	0.0310612	0.0459736	0.0144735	-0.0199935	0.0288703	0.0191562	-0.0181876	-0.1082	0.0123971	0.0187676	-0.216153	-0.00560471	0.0603039	-0.162189	-0.107828	-0.0607049	-0.0582965	0.00253585
s__Parvimonas_unclassified	0.306526	0.125163	-0.266626	-0.31889	0.142487	-0.0924872	0.124017	0.0635382	0.050226	-0.120903	0.0617977	0.0836086	0.112311	0.125289	0.099577	0.0806974	-0.0425895	-0.00197577	-0.0408376	-0.155755	-0.176571	-0.137271	0.0913313	-0.146212	0.0503978	0.0951307	-0.0302666	-0.0438819	-0.142495	0.021046	0.0836183
s__Eubacterium_brachy	0.232469	0.0666545	-0.123072	-0.143071	0.0797703	-0.0481783	0.0807965	0.0468509	0.0220358	-0.080046	0.0340841	0.0381012	0.0684499	0.0665146	0.0589577	0.0412505	-0.0253358	0.00734289	-0.0133166	-0.0768768	-0.112234	-0.0596138	0.0473722	-0.129189	0.0215613	0.0610169	-0.0603948	-0.0510882	-0.0829546	-0.00703315	0.039175
s__Haemophilus_haemolyticus	0.0192894	-0.0692003	0.092113	0.105937	-0.0831825	0.0340849	-0.0900254	-0.0583738	-0.0262754	0.0720233	-0.0403786	-0.0398748	-0.075529	-0.068961	-0.0654668	-0.0452825	0.0154542	-0.0201221	-0.00145442	0.0573243	0.102523	0.0376691	-0.0510696	0.135895	-0.025538	-0.06974	0.0698305	0.0523963	0.0699768	0.0073857	-0.041428
s__Catonella_morbi	-0.103264	-0.0724868	0.116502	0.135334	-0.0865215	0.0438353	-0.0895893	-0.0548199	-0.0263324	0.0792944	-0.0396562	-0.0423147	-0.0759206	-0.0723062	-0.065783	-0.0463872	0.0213526	-0.0138686	0.00708817	0.0720244	0.11243	0.053123	-0.0526846	0.135814	-0.0257453	-0.0686984	0.064693	0.0521603	0.0806432	0.00568853	-0.0436037
s__Streptococcus_australis	0.242278	0.124164	-0.372735	-0.462712	0.125046	-0.109786	0.0571375	0.00121826	0.0662874	-0.0650369	0.0522104	0.109074	0.0720846	0.125221	0.0707733	0.0850408	-0.0406087	-0.0471498	-0.0882265	-0.19868	-0.112305	-0.212322	0.09419	0.067434	0.0689935	0.0463406	0.158063	0.0698561	-0.126096	0.0959275	0.104316
s__Lautropia_mirabilis	0.146053	0.160054	-0.345949	-0.419407	0.177124	-0.11046	0.142082	0.0692003	0.0726181	-0.126841	0.0803319	0.115845	0.134457	0.160442	0.121743	0.10697	-0.0445337	-0.00667982	-0.0548056	-0.194347	-0.192869	-0.179802	0.119613	-0.11814	0.0734657	0.111274	0.017416	-0.0180092	-0.163196	0.0516934	0.114658
s__Neisseria_sicca	0.151394	0.0360498	-0.128949	-0.160516	0.0348381	-0.0386322	0.00911519	-0.00797042	0.0194826	-0.0180098	0.012757	0.033722	0.0162039	0.0364644	0.016827	0.0242906	-0.0152411	-0.0215543	-0.0346084	-0.0687673	-0.0320407	-0.075943	0.0270192	0.0377181	0.0205586	0.00737331	0.0637869	0.0294367	-0.040687	0.0340793	0.0318019
s__Prevotella_veroralis	0.232891	-0.00380288	0.0695338	0.096909	0.00861426	0.00568269	0.0451026	0.0409898	-0.0173722	-0.048987	0.00181242	-0.0239534	0.0251706	-0.00449198	0.0165358	-0.0083045	-0.008033	0.0274702	0.0286473	0.0239504	-0.0558942	0.048028	-0.00707418	-0.166451	-0.019252	0.0313232	-0.146257	-0.0910335	-0.0199409	-0.0613999	-0.0204133
s__Prevotella_maculosa	0.0432068	-0.0685363	0.0960245	0.111833	-0.0812815	0.0337973	-0.0850592	-0.054267	-0.0274233	0.0666825	-0.0397401	-0.0413287	-0.0724162	-0.0683568	-0.0632199	-0.0453807	0.0143672	-0.0177453	0.000706903	0.0581276	0.0961157	0.040747	-0.050972	0.11999	-0.0268503	-0.0662259	0.0566583	0.0439811	0.0670194	0.00211641	-0.0425697
s__Stomatobaculum_longum	0.000644642	-0.065667	0.0936227	0.108505	-0.0783773	0.0341339	-0.0828215	-0.0526476	-0.025213	0.0673959	-0.0376443	-0.038665	-0.070056	-0.0654774	-0.0608916	-0.0429474	0.0154305	-0.0166811	0.00132544	0.0575317	0.0962995	0.0400512	-0.0484363	0.121909	-0.0246142	-0.064134	0.0596075	0.0460804	0.0671259	0.00456049	-0.0399507
s__Neisseria_meningitidis	-0.398886	-0.0924727	0.217838	0.260107	-0.105415	0.0783594	-0.0891429	-0.0420095	-0.0344923	0.0978818	-0.0425957	-0.0609491	-0.0809716	-0.0926056	-0.0714342	-0.0578921	0.0386211	0.00859749	0.0390742	0.128789	0.141111	0.115519	-0.0661543	0.11185	-0.0347203	-0.0672185	0.0221012	0.0355047	0.116227	-0.0138421	-0.0607806
s__Lachnospiraceae_bacterium_ICM7	0.121837	0.0212312	-0.110038	-0.139597	0.0163107	-0.0302877	-0.0124991	-0.0221928	0.0150228	0.00127506	0.00427788	0.0264354	-0.00127006	0.0217292	0.00200944	0.015116	-0.0105728	-0.0264859	-0.035331	-0.0558858	-0.00550992	-0.0685519	0.0164731	0.076485	0.0163457	-0.00903747	0.0866397	0.0460031	-0.0230837	0.0391392	0.024013
s__Parvimonas_micra	0.231693	-0.0494978	0.0591516	0.0711047	-0.0565633	0.0153737	-0.0562113	-0.0372109	-0.0247312	0.0319168	-0.0310236	-0.0339408	-0.0497702	-0.0494366	-0.0446478	-0.0353146	0.00216822	-0.0153195	-0.00366202	0.0319911	0.0498567	0.0228885	-0.0387287	0.0565829	-0.0245121	-0.0454301	0.018379	0.0145478	0.0342938	-0.00949227	-0.0344549
s__Capnocytophaga_gingivalis	0.0245035	-0.0479583	0.0504785	0.0557283	-0.0593266	0.0207287	-0.0694842	-0.0473747	-0.016767	0.0547435	-0.0292396	-0.0250054	-0.0566316	-0.0476918	-0.0484961	-0.0310406	0.0101523	-0.0193634	-0.00686784	0.0337464	0.0764928	0.0167653	-0.0351553	0.11585	-0.0159824	-0.0536309	0.0679484	0.0477703	0.0489664	0.0127363	-0.0265946
s__Actinomyces_viscosus	-0.245706	-0.0908095	0.193062	0.230384	-0.103847	0.0678594	-0.09149	-0.0471913	-0.0356571	0.0903097	-0.0447041	-0.0598343	-0.0823217	-0.0908802	-0.0727536	-0.0581937	0.0318418	0.00107719	0.0294239	0.113501	0.131182	0.0992537	-0.0659985	0.112441	-0.0357243	-0.0699652	0.0271318	0.0353618	0.105178	-0.0129787	-0.0599512
s__Neisseria_flavescens	0.152674	0.139019	-0.318757	-0.388273	0.151738	-0.100276	0.114292	0.0510403	0.0647155	-0.104664	0.067981	0.10388	0.11124	0.139486	0.101655	0.0932239	-0.0398731	-0.0131236	-0.0556021	-0.177286	-0.161385	-0.168916	0.104102	-0.0755399	0.0658037	0.0897564	0.0398097	-0.00139986	-0.141903	0.054392	0.10219
s__Leptotrichia_wadei	-0.00386076	-0.0686034	0.0972869	0.112566	-0.0820362	0.0357239	-0.0870776	-0.0554604	-0.026128	0.0711143	-0.0393414	-0.0401333	-0.0735065	-0.0683976	-0.0638245	-0.0447819	0.0163002	-0.0176811	0.00114781	0.0600108	0.101432	0.0414617	-0.0505387	0.129415	-0.0254813	-0.0673758	0.0640073	0.049261	0.0705204	0.00549805	-0.0415166
s__Atopobium_rimae	0.269812	0.00380182	0.0922554	0.130088	0.0230642	0.00668885	0.0761138	0.0669294	-0.020117	-0.0756673	0.00886529	-0.0281458	0.0460185	0.00278854	0.0325884	-0.0051376	-0.0110516	0.0435668	0.043318	0.0304804	-0.0887404	0.0670575	-0.00277222	-0.250788	-0.0228899	0.0542431	-0.214966	-0.133942	-0.0337909	-0.0867643	-0.0229067
s__Streptococcus_cristatus	0.211806	-0.012447	-0.0599705	-0.0794034	-0.022001	-0.0155852	-0.0488257	-0.0446748	-0.000997415	0.0256162	-0.0154846	0.00329934	-0.0337798	-0.0119364	-0.0271237	-0.00829536	-0.00627599	-0.033432	-0.0336079	-0.0280414	0.0317602	-0.0462949	-0.00940266	0.113498	0.000398555	-0.0380494	0.0963793	0.0555228	0.00438698	0.0322972	0.000664356
s__Alloprevotella_tannerae	0.1089	0.0493205	0.0248739	0.0483319	0.0741858	-0.0117309	0.123201	0.0959871	0.00273094	-0.104615	0.0358806	0.0043089	0.0888698	0.0483176	0.0713406	0.0270674	-0.0152632	0.05274	0.0410547	-0.0059204	-0.134406	0.0370572	0.0326227	-0.291796	-6.45021e-05	0.0922583	-0.220928	-0.141773	-0.0679858	-0.0742554	0.00968898
s__Haemophilus_influenzae	0.056938	-0.0961215	0.174932	0.210753	-0.108407	0.0550567	-0.0962627	-0.0541254	-0.0437476	0.0758666	-0.0521631	-0.0668366	-0.0877394	-0.0961959	-0.0787184	-0.0651123	0.0206196	-0.00830563	0.0186974	0.0987044	0.114712	0.0853882	-0.072531	0.0957219	-0.043831	-0.0759101	0.0147026	0.0231112	0.0903251	-0.0226101	-0.0669113
s__Streptococcus_gordonii	0.114166	-0.0703534	0.14718	0.181374	-0.0753652	0.0412984	-0.055393	-0.0263537	-0.0368641	0.0394282	-0.0370082	-0.055497	-0.0554016	-0.0706191	-0.0515729	-0.0494374	0.0123064	0.00243704	0.0222207	0.0783168	0.0652396	0.076155	-0.0543941	0.0175321	-0.037503	-0.0449989	-0.0345195	-0.011464	0.0587726	-0.0352212	-0.0544605
s__Selenomonas_flueggei	0.0137863	-0.0957116	0.171854	0.205867	-0.109037	0.0559115	-0.0995752	-0.0567997	-0.041901	0.081042	-0.0518413	-0.0646674	-0.0894695	-0.0957341	-0.0797219	-0.0641206	0.0222523	-0.00959767	0.0175242	0.098506	0.120713	0.0832549	-0.0716902	0.109989	-0.041842	-0.0780171	0.0268075	0.0310789	0.0934018	-0.0172502	-0.065012
s__Haemophilus_sputorum	0.123193	-0.00115783	-0.0397709	-0.0511622	-0.00500545	-0.0115215	-0.0185428	-0.0190286	0.00124584	0.00695752	-0.00518734	0.00465385	-0.0118488	-0.000909334	-0.00919526	-0.000990854	-0.00505165	-0.0163395	-0.0180068	-0.020036	0.00761758	-0.0279826	-0.00108533	0.0478112	0.00191817	-0.0145837	0.0443764	0.0243492	-0.0040402	0.0159253	0.0033984
s__Corynebacterium_matruchotii	0.00193965	-0.0601905	0.0809056	0.0929006	-0.0725063	0.0303216	-0.0786729	-0.0509035	-0.0224939	0.0638344	-0.0349468	-0.0343871	-0.0658719	-0.0599776	-0.0570103	-0.0392	0.0140498	-0.0173043	-0.000942755	0.0506131	0.0906065	0.0332701	-0.0442795	0.120372	-0.0218388	-0.0608245	0.0623571	0.0468188	0.0619071	0.00722003	-0.0357651
s__Human_herpesvirus_7	0.187653	0.134946	-0.324666	-0.396554	0.145854	-0.101592	0.104328	0.0426589	0.0636268	-0.0988617	0.064366	0.102988	0.103896	0.135494	0.0955823	0.0904927	-0.0404258	-0.0186959	-0.0606196	-0.179675	-0.153749	-0.174546	0.101031	-0.0550865	0.0649391	0.0819766	0.0557426	0.00810259	-0.139224	0.0591482	0.10087
s__Scardovia_wiggsiae	0.270816	0.0177394	0.0624878	0.0938111	0.0383299	-0.00244661	0.088044	0.0727088	-0.0134737	-0.0856571	0.0159754	-0.0177657	0.0574969	0.0167659	0.0430717	0.00433477	-0.0144519	0.0430332	0.0386846	0.0140392	-0.104271	0.0516153	0.00776207	-0.258884	-0.0161561	0.0636916	-0.211745	-0.134274	-0.0471545	-0.0814658	-0.0126622
s__Capnocytophaga_ochracea	-0.330514	-0.0909312	0.20584	0.245789	-0.103733	0.0732946	-0.0890665	-0.0435712	-0.0347326	0.0935912	-0.0430611	-0.060026	-0.0806521	-0.0910403	-0.0712321	-0.0575118	0.0354087	0.00552662	0.0348389	0.12135	0.135404	0.107912	-0.0655008	0.110263	-0.0349005	-0.0675786	0.0232935	0.0346845	0.110458	-0.0136419	-0.0599609
s__Campylobacter_showae	0.0533353	-0.0497068	0.0347501	0.034762	-0.0634594	0.0172067	-0.0806092	-0.0576987	-0.0158982	0.0617094	-0.0320516	-0.0228816	-0.0639326	-0.0493082	-0.0541388	-0.0319167	0.00924972	-0.0270816	-0.0148037	0.0267349	0.0847947	0.00513354	-0.0362695	0.145343	-0.0147532	-0.062108	0.0935457	0.062782	0.0503676	0.0220528	-0.0251496
s__Aggregatibacter_segnis	-0.282983	-0.0850258	0.179665	0.213175	-0.0983307	0.0652135	-0.08923	-0.046793	-0.0315768	0.0905447	-0.0415778	-0.054096	-0.0790593	-0.0850429	-0.0693299	-0.0536736	0.0319503	0.000104264	0.0269826	0.1073	0.129925	0.0919967	-0.0611871	0.120139	-0.031504	-0.0677529	0.0375229	0.0413351	0.102576	-0.00680256	-0.0544647
s__Neisseria_subflava	-0.042138	-0.0545103	0.070243	0.0791956	-0.066871	0.0284548	-0.075427	-0.0494238	-0.0185869	0.0637226	-0.0316036	-0.0290713	-0.0620299	-0.0542595	-0.0531594	-0.0347459	0.014479	-0.0172938	-0.00225445	0.0457923	0.0890219	0.0278707	-0.0395397	0.125194	-0.0178341	-0.0578431	0.0699621	0.0512741	0.0596691	0.0123355	-0.0306225
s__Streptococcus_tigurinus	-0.0301334	-0.0595782	0.0650736	0.0711892	-0.0744478	0.028347	-0.0883101	-0.0598456	-0.0192451	0.0732356	-0.0356855	-0.0296674	-0.0713653	-0.0592206	-0.0607297	-0.037767	0.0150863	-0.0235943	-0.00758648	0.0446369	0.101301	0.0223003	-0.043075	0.154313	-0.0181957	-0.0676543	0.0923874	0.0652415	0.0651633	0.0196129	-0.0317871
s__Prevotella_saccharolytica	-0.253015	-0.0894861	0.189193	0.225393	-0.102676	0.0670604	-0.0913689	-0.0474954	-0.034654	0.0905967	-0.0440682	-0.0583806	-0.0818164	-0.0895388	-0.0721484	-0.0571469	0.0318107	0.000533402	0.0285137	0.111707	0.131154	0.0970331	-0.0648892	0.115372	-0.0346738	-0.0697591	0.030578	0.0373433	0.104569	-0.0111556	-0.0585838
s__Bacteroidetes_oral_taxon_274	-0.208364	-0.0774294	0.145582	0.17094	-0.0911992	0.0542621	-0.0889314	-0.0506537	-0.0278853	0.0854114	-0.0398018	-0.0468041	-0.0767456	-0.0773349	-0.066747	-0.0489174	0.026952	-0.00692618	0.0167165	0.0886711	0.121424	0.0712758	-0.0557743	0.130323	-0.0275219	-0.0676997	0.0538668	0.0484674	0.0914601	0.00107842	-0.0476938
s__Prevotella_loescheii	-0.0754375	-0.0790588	0.12879	0.150661	-0.0934611	0.0468099	-0.0946563	-0.0574351	-0.0301188	0.0818505	-0.0433639	-0.0477181	-0.0810828	-0.0789041	-0.0706603	-0.0512006	0.0217949	-0.0140979	0.00854812	0.0782359	0.11715	0.0592647	-0.057914	0.13595	-0.029595	-0.0729461	0.0604949	0.050186	0.0849833	0.00183311	-0.048902
s__Leptotrichia_goodfellowii	-0.233931	-0.0849573	0.174369	0.207074	-0.0981051	0.062462	-0.0894263	-0.0477383	-0.0323931	0.0877111	-0.0423449	-0.0544535	-0.0793026	-0.0849692	-0.0696912	-0.0541482	0.0299044	-0.00160616	0.0247713	0.103649	0.126418	0.0884582	-0.0615326	0.117584	-0.0323084	-0.0682465	0.0363413	0.0396975	0.0993184	-0.00776507	-0.0548402
s__Streptococcus_constellatus	0.370692	-0.0268458	0.0595414	0.0802879	-0.0224559	0.00475927	-0.00106681	0.00417734	-0.02479	-0.0204243	-0.0161484	-0.032325	-0.0100838	-0.0272225	-0.0130525	-0.0237649	-0.0085368	0.00510614	0.0104785	0.0220778	-0.0172337	0.0324387	-0.0244211	-0.0789079	-0.0257965	-0.00475613	-0.0825089	-0.0518917	-0.00255486	-0.044301	-0.0304703
s__Streptococcus_oligofermentans	-0.317098	-0.0907456	0.20168	0.240528	-0.10382	0.0719928	-0.0903373	-0.0450552	-0.0345599	0.0937529	-0.0433931	-0.0594732	-0.0813967	-0.0908335	-0.0717913	-0.0574391	0.0347901	0.00408042	0.0331424	0.119156	0.135462	0.105107	-0.0654057	0.113767	-0.0346711	-0.0686009	0.0268416	0.0365197	0.109639	-0.0123255	-0.059513
s__Lachnospiraceae_oral_taxon_107	-0.381577	-0.0920983	0.214795	0.256472	-0.105012	0.0770803	-0.0891595	-0.0424327	-0.0345555	0.0968242	-0.042725	-0.0607185	-0.0809172	-0.0922248	-0.0714046	-0.0578051	0.0378114	0.00780467	0.0379902	0.126908	0.139704	0.113584	-0.0659998	0.111528	-0.0347675	-0.0673368	0.0224623	0.0353349	0.114786	-0.0137726	-0.0605777
s__Neisseria_macacae	-0.15138	-0.0826545	0.153473	0.181305	-0.0963594	0.0550364	-0.0921129	-0.0524461	-0.0317381	0.0846665	-0.0431628	-0.0517882	-0.0804462	-0.0825917	-0.0704751	-0.053182	0.0258756	-0.00758705	0.0171056	0.0918281	0.121829	0.0749481	-0.0602623	0.125393	-0.0314565	-0.0707042	0.0467804	0.0440062	0.0924679	-0.00383561	-0.0525323
s__Actinomyces_naeslundii	-0.380545	-0.091784	0.212853	0.25397	-0.104828	0.0766008	-0.089568	-0.0429626	-0.0342669	0.0970635	-0.0426838	-0.0602328	-0.0810677	-0.0919	-0.0714663	-0.0575582	0.0376836	0.00727678	0.0373281	0.12597	0.139877	0.112347	-0.065739	0.113419	-0.0344507	-0.0676295	0.0244048	0.0364242	0.114533	-0.012924	-0.0601439
s__Lachnospiraceae_bacterium_oral_taxon_082	-0.368562	-0.090623	0.208858	0.249153	-0.103557	0.0751333	-0.0887902	-0.0428641	-0.0338836	0.0956755	-0.0423096	-0.0594076	-0.0802767	-0.0907324	-0.0707597	-0.0568856	0.036906	0.00670782	0.0362938	0.123621	0.137887	0.110033	-0.0649508	0.112622	-0.0340512	-0.0670869	0.0248168	0.0362588	0.112672	-0.0125507	-0.0593454
s__Leptotrichia_buccalis	-0.398954	-0.092462	0.217816	0.26008	-0.105404	0.0783551	-0.0891368	-0.042007	-0.0344852	0.0978807	-0.0425896	-0.0609392	-0.0809644	-0.0925948	-0.071427	-0.0578838	0.0386213	0.00859704	0.0390711	0.128779	0.141107	0.115508	-0.0661455	0.111858	-0.034713	-0.067213	0.0221149	0.0355125	0.116222	-0.0138328	-0.060771
s__Alloprevotella_rava	-0.020773	0.0645329	-0.0941771	-0.109946	0.0763599	-0.0332343	0.0790224	0.0497833	0.0257011	-0.0631688	0.0369459	0.039122	0.0674859	0.0643795	0.0589437	0.0425814	-0.0143651	0.0153257	-0.00228939	-0.0568903	-0.091041	-0.0409453	0.0478783	-0.110952	0.0252033	0.0614284	-0.0511163	-0.040454	-0.0642362	-0.00131874	0.0402137
s__Eikenella_corrodens	-0.339269	-0.0876266	0.191923	0.22781	-0.101237	0.070166	-0.0906946	-0.0463102	-0.0319548	0.0952288	-0.0419155	-0.0557475	-0.0805764	-0.0876634	-0.0706113	-0.0548757	0.0349122	0.00249315	0.0307085	0.114796	0.136332	0.0994098	-0.0627203	0.123041	-0.0319299	-0.0685526	0.0369675	0.0424781	0.10864	-0.00718436	-0.0560371
s__Treponema_socranskii	-0.388415	-0.0914533	0.212266	0.253111	-0.10459	0.076687	-0.0896532	-0.0430585	-0.0338774	0.0975923	-0.0424484	-0.0597623	-0.0809925	-0.0915634	-0.0713275	-0.0572228	0.0379239	0.00724628	0.0372584	0.125853	0.140423	0.11204	-0.0654061	0.114926	-0.0340452	-0.0676195	0.0258275	0.0373679	0.114799	-0.0121829	-0.0597035
s__Prevotella_denticola	0.196569	-0.0421782	0.0592514	0.0724352	-0.0469717	0.0147848	-0.0428409	-0.0268796	-0.022234	0.0233234	-0.0256506	-0.0308698	-0.0393744	-0.0421977	-0.0358607	-0.0304138	0.00195316	-0.00941073	0.000770312	0.0310376	0.0380767	0.0257097	-0.0332303	0.032284	-0.0222421	-0.0349846	0.00144139	0.00392816	0.0284206	-0.0137044	-0.0309422
s__Prevotella_micans	0.0555693	-0.0736848	0.142724	0.173361	-0.0816788	0.0433937	-0.0681552	-0.0363013	-0.0350674	0.0530569	-0.0393122	-0.0535401	-0.0639139	-0.0738213	-0.0579884	-0.0504132	0.0153922	-0.00270666	0.018146	0.0789864	0.0820633	0.0715458	-0.0559631	0.0547488	-0.0353481	-0.0541291	-0.00508191	0.00773546	0.0674979	-0.0239261	-0.0531893
s__Actinobacillus_unclassified	-0.0127016	-0.0637821	0.0963262	0.112352	-0.0756078	0.0346358	-0.0780712	-0.0486784	-0.0247941	0.0644299	-0.0359942	-0.0383355	-0.0665821	-0.0636319	-0.0580389	-0.0417236	0.0155709	-0.0140911	0.00363818	0.0585435	0.0924309	0.0426436	-0.0470455	0.111811	-0.0243044	-0.0604515	0.0517302	0.0413289	0.0656752	0.00213033	-0.039413
s__Corynebacterium_durum	-0.338314	-0.0881157	0.193053	0.229217	-0.101743	0.0704673	-0.0910093	-0.0464288	-0.0322304	0.0954384	-0.0421646	-0.0561622	-0.0809198	-0.0881553	-0.0709405	-0.0552258	0.0349921	0.00255539	0.0309101	0.115381	0.136711	0.100014	-0.063103	0.122929	-0.0322127	-0.0688148	0.0365229	0.0422733	0.109026	-0.00751185	-0.0564395
s__Aggregatibacter_unclassified	-0.330436	-0.0891407	0.196752	0.234069	-0.102512	0.0711387	-0.0905747	-0.0457233	-0.0331712	0.0946712	-0.0426109	-0.0575154	-0.081001	-0.0892016	-0.0711953	-0.0560954	0.0349319	0.00328537	0.0319276	0.117006	0.136101	0.102234	-0.0640052	0.118839	-0.0332104	-0.0686016	0.0322784	0.039757	0.109261	-0.00957027	-0.0576876
s__Streptococcus_peroris	-0.327642	-0.089497	0.197256	0.234709	-0.102888	0.071224	-0.0908717	-0.0459054	-0.0333951	0.094749	-0.0428354	-0.057813	-0.0812981	-0.089559	-0.0714773	-0.056369	0.0349025	0.00321705	0.0319376	0.117238	0.136281	0.102458	-0.0642985	0.11883	-0.0334369	-0.0688575	0.0320633	0.0396333	0.109416	-0.00978784	-0.0579812
s__Actinomyces_oris	-0.321909	-0.0861566	0.183972	0.217878	-0.0999954	0.0676895	-0.0912575	-0.0476918	-0.0311502	0.0945396	-0.041712	-0.0541264	-0.0805096	-0.0861629	-0.070397	-0.0539467	0.0338158	0.000598038	0.02813	0.110534	0.135018	0.0944576	-0.0616682	0.126776	-0.0310451	-0.0690199	0.0417652	0.044779	0.106401	-0.00504321	-0.0545617
s__Actinomyces_johnsonii	-0.376069	-0.0917764	0.213386	0.254776	-0.104663	0.0765394	-0.0889967	-0.0424884	-0.0344774	0.0963475	-0.0426633	-0.0604919	-0.0807361	-0.0919003	-0.0712449	-0.0576391	0.0375048	0.00754115	0.0375742	0.126067	0.139036	0.112737	-0.065797	0.111326	-0.0346828	-0.067241	0.0226401	0.035286	0.114134	-0.0136669	-0.0603622
s__Lachnoanaerobaculum_saburreum	-0.377376	-0.0902129	0.205971	0.245213	-0.103548	0.074803	-0.0900894	-0.0441335	-0.0331407	0.0972002	-0.0422146	-0.0583722	-0.0809021	-0.090298	-0.0711077	-0.0564019	0.0371483	0.00578721	0.035259	0.122534	0.139548	0.10814	-0.0644901	0.118199	-0.0332424	-0.0679594	0.0299074	0.0393961	0.113142	-0.0103258	-0.0584336
s__Selenomonas_sputigena	-0.388828	-0.0916449	0.213452	0.254643	-0.104698	0.076972	-0.0893912	-0.0427263	-0.0340605	0.0974232	-0.042475	-0.0600658	-0.0808937	-0.0917616	-0.0712856	-0.0573766	0.037993	0.00757069	0.0376631	0.12642	0.140289	0.112796	-0.0655674	0.113717	-0.0342459	-0.0674331	0.0245981	0.0366728	0.114937	-0.0127204	-0.0599743
s__Leptotrichia_hofstadii	-0.392876	-0.0923074	0.217248	0.259479	-0.10516	0.0779935	-0.088806	-0.0418443	-0.03457	0.0972469	-0.0425748	-0.0609636	-0.0807363	-0.0924424	-0.0712627	-0.0578583	0.0383358	0.00854432	0.0389243	0.128324	0.140307	0.115188	-0.0660885	0.11073	-0.0348043	-0.0670058	0.0213544	0.0349197	0.11564	-0.0141528	-0.0607825
s__Capnocytophaga_granulosa	-0.39113	-0.0917293	0.213807	0.25505	-0.104806	0.0771415	-0.0894902	-0.0427526	-0.0340519	0.0976441	-0.0424864	-0.0600945	-0.0809723	-0.0918459	-0.0713465	-0.057407	0.038108	0.00762618	0.0377641	0.126658	0.140578	0.113004	-0.0656108	0.114006	-0.034237	-0.0674935	0.0247437	0.0368165	0.115173	-0.012663	-0.0600042
s__Propionibacterium_propionicum	-0.103027	-0.0653875	0.0890242	0.100337	-0.0804805	0.0368896	-0.0906353	-0.0586536	-0.0212876	0.0797514	-0.0371174	-0.0342688	-0.0743448	-0.0650859	-0.0635107	-0.0410935	0.0195335	-0.0192248	-0.00069042	0.0584335	0.110837	0.0366141	-0.0469845	0.154226	-0.0203801	-0.069124	0.0864159	0.0639792	0.0750637	0.0163341	-0.0361421
s__Selenomonas_artemidis	-0.398969	-0.0924698	0.21784	0.260109	-0.105412	0.078362	-0.0891402	-0.0420068	-0.0344894	0.0978846	-0.0425928	-0.0609461	-0.0809688	-0.0926026	-0.0714314	-0.0578892	0.0386238	0.00860014	0.0390768	0.128792	0.141114	0.115521	-0.0661514	0.111853	-0.0347174	-0.0672157	0.0221044	0.0355077	0.11623	-0.0138391	-0.0607777
s__Oribacterium_sp_oral_taxon_078	-0.382769	-0.0909696	0.209601	0.249776	-0.104189	0.0758653	-0.0898705	-0.0435426	-0.0336041	0.0973944	-0.0423854	-0.0592159	-0.0809896	-0.0910693	-0.0712704	-0.0569144	0.0375654	0.00660188	0.0363882	0.124432	0.140023	0.110376	-0.0650579	0.11626	-0.0337442	-0.0677964	0.0274989	0.0381816	0.114072	-0.011441	-0.0592074
s__Campylobacter_gracilis	-0.371782	-0.0897632	0.203706	0.242404	-0.10314	0.0740667	-0.0901493	-0.0444534	-0.032926	0.096885	-0.0421397	-0.0579227	-0.0808152	-0.0898406	-0.0709955	-0.0561282	0.0368028	0.00527898	0.0345443	0.121293	0.139026	0.106744	-0.0641759	0.118968	-0.0330074	-0.0680218	0.0310475	0.0398992	0.112419	-0.00980337	-0.0580205
s__Cryptobacterium_curtum	-0.165261	-0.0934109	0.190054	0.227285	-0.106463	0.0650965	-0.0941928	-0.0499251	-0.0382794	0.0876408	-0.0473584	-0.0624212	-0.0849911	-0.09348	-0.0754135	-0.0608148	0.0291397	-0.00167151	0.0266474	0.110659	0.128491	0.0963744	-0.0686151	0.109997	-0.0383426	-0.0726584	0.0247225	0.0328299	0.102436	-0.0155293	-0.0625454
s__Treponema_medium	-0.36528	-0.0885497	0.200201	0.238149	-0.101825	0.0728724	-0.0892825	-0.0442095	-0.0324264	0.0957586	-0.0416467	-0.0570188	-0.0799382	-0.088621	-0.0701964	-0.0553626	0.0362394	0.00491005	0.033749	0.119293	0.137348	0.104778	-0.0633042	0.118372	-0.0324931	-0.0673717	0.0315618	0.0398894	0.110862	-0.00931685	-0.0571407
s__Selenomonas_infelix	-0.384597	-0.0913089	0.211576	0.252299	-0.104417	0.0763855	-0.0895394	-0.0430646	-0.0338769	0.0972649	-0.0424355	-0.0596904	-0.0808909	-0.0914184	-0.0712467	-0.0571658	0.0377313	0.00711537	0.0370482	0.125413	0.139987	0.111623	-0.0653283	0.114615	-0.0340432	-0.0675562	0.0257395	0.0372206	0.114411	-0.012216	-0.0596337
s__Porphyromonas_endodontalis	0.0481115	-0.0523005	0.0557672	0.0621653	-0.064216	0.0219793	-0.0741758	-0.05046	-0.0190529	0.0571579	-0.0319757	-0.0281094	-0.0608639	-0.0520319	-0.0523299	-0.0341902	0.0102102	-0.0206382	-0.00714006	0.0365023	0.0804101	0.0188533	-0.0385913	0.119834	-0.0182583	-0.0574637	0.0687578	0.0485057	0.0517176	0.0115515	-0.0297263
s__Shuttleworthia_satelles	-0.393874	-0.0926976	0.218024	0.260399	-0.105613	0.0782731	-0.0892265	-0.0420741	-0.0347179	0.0976527	-0.042772	-0.0612107	-0.0811066	-0.0928325	-0.0715875	-0.0581072	0.0384698	0.00852757	0.0390275	0.128788	0.140891	0.115578	-0.0663713	0.111296	-0.0349514	-0.067327	0.0215458	0.0351152	0.116093	-0.0141795	-0.0610321
s__Actinomyces_massiliensis	-0.339974	-0.0908436	0.20932	0.250289	-0.103291	0.0742593	-0.0873994	-0.0418779	-0.0348857	0.0928682	-0.0426261	-0.0604789	-0.0795967	-0.0909752	-0.0704217	-0.0574525	0.0358003	0.0069561	0.0364083	0.12307	0.134605	0.11036	-0.0654298	0.105819	-0.0351146	-0.0662798	0.019197	0.0324039	0.110728	-0.0151377	-0.0602997
s__Escherichia_unclassified	-0.38185	-0.0920677	0.216225	0.258391	-0.104773	0.0773494	-0.0882859	-0.0416091	-0.0347328	0.0961613	-0.0425758	-0.0610208	-0.0803829	-0.0922062	-0.0710147	-0.0578367	0.037827	0.00841795	0.0386371	0.127514	0.138941	0.114598	-0.0660138	0.10885	-0.0349773	-0.0666907	0.0200922	0.033921	0.114631	-0.0146984	-0.0608189
s__Prevotella_pleuritidis	0.153399	-0.0304905	-0.0491125	-0.0706962	-0.0466687	-0.00690239	-0.083408	-0.0695267	-0.00409135	0.0568757	-0.0267214	-0.00214363	-0.0599455	-0.029762	-0.0485884	-0.0186802	0.000219849	-0.0446486	-0.0398762	-0.016885	0.0730418	-0.0459035	-0.0216715	0.188345	-0.00207727	-0.0639505	0.148369	0.0905335	0.0287026	0.0482519	-0.00598856
s__Aggregatibacter_aphrophilus	-0.397792	-0.0924431	0.2176	0.259818	-0.105387	0.0782685	-0.0891581	-0.0420521	-0.034489	0.0978257	-0.0426038	-0.0609227	-0.0809748	-0.0925753	-0.0714362	-0.0578813	0.0385683	0.00853344	0.0389891	0.128649	0.141033	0.115367	-0.0661392	0.111887	-0.0347152	-0.0672361	0.0221795	0.0355261	0.116134	-0.0138141	-0.0607574
s__Cardiobacterium_hominis	-0.391188	-0.091693	0.213635	0.254829	-0.104781	0.0771023	-0.0895165	-0.0427912	-0.0340202	0.0976663	-0.0424757	-0.0600447	-0.0809767	-0.0918087	-0.0713435	-0.0573779	0.0381009	0.00758567	0.0377108	0.126577	0.140593	0.112898	-0.0655802	0.114171	-0.0342028	-0.0675107	0.0249161	0.0369147	0.115152	-0.0125837	-0.0599589
s__Neisseria_elongata	-0.179596	-0.0651555	0.10811	0.124456	-0.0788403	0.0431211	-0.083378	-0.0506953	-0.0213998	0.0787629	-0.0347301	-0.0360351	-0.0696911	-0.0649552	-0.0598215	-0.0405576	0.0227375	-0.0118046	0.00772702	0.0686293	0.110047	0.0498624	-0.0464992	0.136962	-0.0207651	-0.0632231	0.0695703	0.0553293	0.0786936	0.0105416	-0.0374018
s__Treponema_denticola	-0.326569	-0.0897332	0.19713	0.2345	-0.103216	0.0712222	-0.0913773	-0.0463085	-0.0334573	0.0950875	-0.0430191	-0.0578828	-0.0816778	-0.0897915	-0.0717924	-0.0565216	0.0349109	0.00297523	0.0317404	0.117218	0.136731	0.10228	-0.0644719	0.119852	-0.0334889	-0.0692487	0.0328212	0.0401032	0.109622	-0.00956771	-0.0580706
s__Haemophilus_paraphrohaemolyticus	-0.237442	-0.084342	0.169782	0.201012	-0.0979543	0.0615732	-0.0909858	-0.0494165	-0.031549	0.0891056	-0.0422941	-0.0531513	-0.0800364	-0.0843228	-0.0701054	-0.0535546	0.0298723	-0.00301077	0.023121	0.101635	0.127842	0.0854684	-0.0609407	0.124063	-0.0313801	-0.0693387	0.042501	0.0433402	0.0993171	-0.00511352	-0.053695
s__Prevotella_intermedia	-0.0395056	-0.0417696	-0.0082483	-0.0226909	-0.0600884	0.0104565	-0.0940216	-0.0722538	-0.00568767	0.0773845	-0.029633	-0.00818636	-0.0692342	-0.0410648	-0.0562984	-0.0241764	0.0108917	-0.038928	-0.0290477	0.00896185	0.100777	-0.0222266	-0.028549	0.210935	-0.00371592	-0.0709218	0.15597	0.100501	0.0523485	0.0500179	-0.0119953
s__Candidatus_Prevotella_conceptionensis	-0.39096	-0.0916896	0.213582	0.254763	-0.10478	0.0770833	-0.0895278	-0.0428067	-0.0340195	0.097661	-0.0424797	-0.060039	-0.080983	-0.0918051	-0.0713484	-0.0573772	0.0380904	0.0075683	0.0376896	0.126547	0.140585	0.112863	-0.0655789	0.114198	-0.0342015	-0.0675204	0.024948	0.0369288	0.115136	-0.0125725	-0.0599543
s__Human_herpesvirus_4	0.142675	-0.0139222	-0.0750253	-0.101356	-0.0274034	-0.0155674	-0.0644186	-0.0579017	0.00290905	0.0419937	-0.0173502	0.00845901	-0.0433819	-0.0132148	-0.0339814	-0.00760363	-0.00326359	-0.041475	-0.041235	-0.0320742	0.051218	-0.057649	-0.00927359	0.164331	0.00484517	-0.0490962	0.139117	0.0825584	0.0127865	0.0495013	0.00480029
s__Alloprevotella_unclassified	-0.12534	-0.0926803	0.192539	0.231606	-0.104384	0.0639565	-0.0890241	-0.0458906	-0.0397256	0.0811665	-0.0469126	-0.0640472	-0.0817842	-0.0928106	-0.0731527	-0.0610526	0.0273778	0.000309077	0.0282469	0.110387	0.120688	0.098527	-0.0686074	0.0925107	-0.0399578	-0.0691072	0.0105309	0.0234951	0.0983344	-0.0213505	-0.063849
s__Filifactor_alocis	-0.351303	-0.0898877	0.203019	0.241861	-0.103045	0.0732416	-0.089671	-0.0442536	-0.0335006	0.0952744	-0.0424327	-0.0584536	-0.0806284	-0.0899732	-0.0709637	-0.0564758	0.0359951	0.00506468	0.0341985	0.120457	0.137121	0.106276	-0.0644682	0.115804	-0.0336048	-0.0678231	0.0285703	0.0380563	0.111088	-0.0110343	-0.0585074
s__Eubacterium_yurii	-0.398024	-0.0924737	0.217724	0.259972	-0.105417	0.0783078	-0.0891627	-0.0420408	-0.0345043	0.0978448	-0.0426125	-0.0609514	-0.0809864	-0.0926062	-0.0714484	-0.0579009	0.0385855	0.00855715	0.039025	0.128717	0.141065	0.115442	-0.0661613	0.111852	-0.0347315	-0.0672393	0.0221207	0.0355003	0.116174	-0.0138437	-0.0607842
s__Streptococcus_mutans	-0.391703	-0.0927062	0.21758	0.259846	-0.105648	0.0781151	-0.0893803	-0.0422494	-0.0347282	0.0976405	-0.0428325	-0.0611829	-0.081208	-0.092839	-0.0716705	-0.0581273	0.0383802	0.00835566	0.0388305	0.128541	0.140868	0.115269	-0.0663891	0.111617	-0.034956	-0.0674562	0.0218717	0.0352702	0.115983	-0.0140759	-0.0610147
s__Kingella_denitrificans	-0.315469	-0.089123	0.196201	0.233635	-0.102298	0.0704991	-0.0900268	-0.0454317	-0.0335638	0.093335	-0.0427535	-0.0578632	-0.0807117	-0.089191	-0.0710449	-0.0562824	0.0343169	0.00320024	0.0317195	0.116345	0.134495	0.101901	-0.0641416	0.116131	-0.0336229	-0.0683051	0.0301962	0.0382306	0.108167	-0.0105459	-0.0579967
s__Mycoplasma_orale	-0.301988	-0.0848711	0.177291	0.209652	-0.098787	0.0654062	-0.0913301	-0.0485711	-0.030632	0.093323	-0.0415438	-0.0529203	-0.0802138	-0.0848567	-0.070058	-0.0532139	0.032667	-0.000906549	0.0260024	0.106788	0.133144	0.0903328	-0.0608074	0.128395	-0.0304727	-0.0691539	0.0445928	0.0458858	0.10406	-0.00376169	-0.0534525
